# Supplementary material for: Mitochondrial Genomes Assembled from Non-Invasive eDNA Metagenomic Scat Samples in Critically Endangered Mammals
Source: MDPI journal article supplement (doi:10.3390/genes14030657), 2023-03-05
Supplement: s1 [file s1]

### Supplementary Materials

Table S1. Mitochondrial genome of *Ursus thibetanus* assembled from scat sample SRR6109212. Features and annotation.

| Name       | Type | Start | Stop  | Strand | Length (bp) | Start | Stop | Anticodon | Continuity |
|------------|------|-------|-------|--------|-------------|-------|------|-----------|------------|
| C. Region1 |      | 1     | 248   | +      | 248         |       |      |           |            |
| OH         |      | 249   | 577   | +      | 329         |       |      |           | 0          |
| C.Region 2 |      | 578   | 1185  | +      | 608         |       |      |           | 0          |
| trnF(gaa)  | tRNA | 1186  | 1253  | +      | 68          |       |      | GAA       | 0          |
| rrnS       | rRNA | 1254  | 2220  | +      | 967         |       |      |           | 0          |
| trnV(tac)  | tRNA | 2221  | 2286  | +      | 66          |       |      | TAC       | -1         |
| rrnL       | rRNA | 2286  | 3867  | +      | 1580        |       |      |           | 1          |
| trnL2(taa) | tRNA | 3869  | 3943  | +      | 75          |       |      | TAA       | 2          |
| nad1       | PCG  | 3946  | 4902  | +      | 957         | ATG   | TAA  |           | -1         |
| trnI(gat)  | tRNA | 4902  | 4970  | +      | 69          |       |      | GAT       | -3         |
| trnQ(ttg)  | tRNA | 4968  | 5040  | -      | 73          |       |      | TTG       | 1          |
| trnM(cat)  | tRNA | 5042  | 5110  | +      | 69          |       |      | CAT       | 0          |
| nad2       | PCG  | 5111  | 6154  | +      | 1044        | ATT   | TAG  |           | -2         |
| trnW(tca)  | tRNA | 6153  | 6219  | +      | 67          |       |      | TCA       | 8          |
| trnA(tgc)  | tRNA | 6228  | 6296  | -      | 69          |       |      | TGC       | 0          |
| trnN(gtt)  | tRNA | 6297  | 6369  | -      | 73          |       |      | GTT       | 2          |
| OL         |      | 6372  | 6403  | +      | 32          |       |      |           | -1         |
| trnC(gca)  | tRNA | 6403  | 6469  | -      | 67          |       |      | GCA       | 0          |
| trnY(gta)  | tRNA | 6470  | 6536  | -      | 67          |       |      | GTA       | 1          |
| cox1       | PCG  | 6538  | 8082  | +      | 1545        | ATG   | TAA  |           | -3         |
| trnS2      | tRNA | 8080  | 8148  | -      | 69          |       |      |           | 6          |
| trnD(gtc)  | tRNA | 8155  | 8221  | +      | 67          |       |      | GTC       | 0          |
| cox2       | PCG  | 8222  | 8905  | +      | 684         | ATG   | TAG  |           | 3          |
| trnK(ttt)  | tRNA | 8909  | 8976  | +      | 68          |       |      | TTT       | 2          |
| atp8       | PCG  | 8979  | 9182  | +      | 204         | ATG   | TAA  |           | -43        |
| atp6       | PCG  | 9140  | 9820  | +      | 680         | ATG   | TAA  |           | -1         |
| cox3       | PCG  | 9820  | 10603 | +      | 784         | ATG   | T--  |           | 0          |
| trnG(tcc)  | tRNA | 10604 | 10672 | +      | 69          |       |      | TCC       | 0          |
| nad3       | PCG  | 10673 | 11029 | +      | 357         | ATC   | TAG  |           | -10        |
| trnR(tcg)  | tRNA | 11020 | 11088 | +      | 69          |       |      | TCG       | 0          |
| nad41      | PCG  | 11089 | 11385 | +      | 297         | ATG   | TAA  |           | -7         |
| nad4       | PCG  | 11379 | 12756 | +      | 1378        | ATG   | T- - |           | 0          |
| trnH(gtg)  | tRNA | 12757 | 12825 | +      | 69          |       |      | GTG       | 0          |
| trnS1      | tRNA | 12826 | 12884 | +      | 59          |       |      |           | 0          |
| trnL1(tag) | tRNA | 12885 | 12954 | +      | 70          |       |      | TAG       | -9         |
| nad5       | PCG  | 12946 | 14757 | +      | 1812        | ATA   | TA-  |           | 1          |
| nad6       | PCG  | 14759 | 15283 | -      | 525         | ATA   | TAA  |           | 3          |
| trnE(tcc)  | tRNA | 15287 | 15355 | -      | 69          |       |      | TCC       | 4          |
| cob        | PCG  | 15360 | 16499 | +      | 1140        | ATG   | AGA  |           | 0          |
| trnT(tgt)  | tRNA | 16500 | 16569 | +      | 70          |       |      | TGT       | -1         |
| trnP(tgg)  | tRNA | 16569 | 16634 | -      | 66          |       |      | TGG       |            |

Table S2. Mitochondrial genome of *Ursus thibetanus* assembled from scat sample SRR6109214. Features and annotation.

| Name           | Type   | Start | Stop  | Strand | Length (bp) | Start | Stop | Anticodon | Continuity |
|----------------|--------|-------|-------|--------|-------------|-------|------|-----------|------------|
| Control Region |        | 1     | 249   | +      | 250         |       |      |           | 0          |
| OH             | origin | 250   | 578   | +      | 329         |       |      |           | 0          |
| Control Region |        | 579   | 1276  | +      | 698         |       |      |           | 0          |
| trnF(gaa)      | tRNA   | 1277  | 1344  | +      | 68          |       |      |           | 0          |
| rrnS           | rRNA   | 1345  | 2311  | +      | 967         |       |      |           | 0          |
| trnV(tac)      | tRNA   | 2312  | 2377  | +      | 66          |       |      |           | 1          |
| rrnL           | rRNA   | 2379  | 3958  | +      | 1579        |       |      |           | 1          |
| trnL2(taa)     | tRNA   | 3960  | 4034  | +      | 74          |       |      |           | 2          |
| nad1           | PCG    | 4037  | 4993  | +      | 957         | ATG   | TAA  |           | -1         |
| trnI(gat)      | tRNA   | 4993  | 5061  | +      | 69          |       |      |           | -3         |
| trnQ(ttg)      | tRNA   | 5059  | 5131  | -      | 73          |       |      |           | 1          |
| trnM(cat)      | tRNA   | 5133  | 5201  | +      | 69          |       |      |           | -27        |
| nad2           | PCG    | 5175  | 6245  | +      | 1071        | ATA   | TAG  |           | -2         |
| trnW(tca)      | tRNA   | 6244  | 6310  | +      | 67          |       |      |           | 8          |
| trnA(tgc)      | tRNA   | 6319  | 6387  | -      | 69          |       |      |           | 0          |
| trnN(gtt)      | tRNA   | 6388  | 6460  | -      | 73          |       |      |           | 2          |
| OL             | origin | 6463  | 6494  | +      | 32          |       |      |           | -1         |
| trnC(gca)      | tRNA   | 6494  | 6560  | -      | 67          |       |      |           | 0          |
| trnY(gta)      | tRNA   | 6561  | 6627  | -      | 67          |       |      |           | 1          |
| cox1           | PCG    | 6629  | 8173  | +      | 1545        | ATG   | TAA  |           | -3         |
| trnS2(tga)     | tRNA   | 8171  | 8239  | -      | 69          |       |      |           | 6          |
| trnD(gtc)      | tRNA   | 8246  | 8312  | +      | 67          |       |      |           | 0          |
| cox2           | PCG    | 8313  | 8996  | +      | 684         | ATG   | TAG  |           | 3          |
| trnK(ttt)      | tRNA   | 9000  | 9067  | +      | 68          |       |      |           | 2          |
| atp8           | PCG    | 9070  | 9273  | +      | 204         | ATG   | TAA  |           | -41        |
| atp6           | PCG    | 9231  | 9911  | +      | 680         | ATG   | TAA  |           | -1         |
| cox3           | PCG    | 9911  | 10694 | +      | 738         | ATG   | T    |           | 0          |
| trnG(tcc)      | tRNA   | 10695 | 10763 | +      | 69          |       |      |           | 9          |
| nad3           | PCG    | 10773 | 11110 | +      | 314         | ATC   | TA   |           | 0          |
| trnR(tcg)      | tRNA   | 11111 | 11179 | +      | 69          |       |      |           | 0          |
| nad4l          | PCG    | 11180 | 11476 | +      | 297         | ATG   | TAA  |           | -7         |
| nad4           | PCG    | 11470 | 12847 | +      | 1377        | ATG   | T    |           | 0          |
| trnH(gtg)      | tRNA   | 12848 | 12916 | +      | 69          |       |      |           | 0          |
| trnS1(gct)     | tRNA   | 12917 | 12975 | +      | 59          |       |      |           | 0          |
| trnL1(tag)     | tRNA   | 12976 | 13045 | +      | 70          |       |      |           | 9          |
| nad5           | PCG    | 13037 | 14875 | +      | 1780        | ATA   | TAA  |           | -24        |
| nad6           | PCG    | 14850 | 15371 | -      | 522         | ATG   | TAA  |           | 6          |
| trnE(ttc)      | tRNA   | 15378 | 15446 | -      | 69          |       |      |           | 4          |
| cob            | PCG    | 15451 | 16590 | +      | 1140        | ATG   | AGA  |           | 0          |
| trnT(tgt)      | tRNA   | 16591 | 16660 | +      | 70          |       |      |           | -1         |
| trnP(tgg)      | tRNA   | 16660 | 16725 | -      | 66          |       |      |           |            |

Table S3. Mitochondrial genome of panda bear *Ailuropoda melanoleuca* assembled from scat sample SRR6109207. Features and annotation.

| Name       | Type | Start | Stop  | Strand | Length<br>(bp) | Start<br>Codon | Stop<br>Codon | Anticodon | Continuity |
|------------|------|-------|-------|--------|----------------|----------------|---------------|-----------|------------|
| CR         |      | 1     | 1164  | +      | 1165           |                |               |           |            |
| OH         |      | 271   | 666   | +      | 396            |                |               |           |            |
| trnF(ttc)  | tRNA | 1165  | 1233  | +      | 69             |                |               | gaa       | 0          |
| rrnS       | rRNA | 1234  | 2199  | +      | 966            |                |               |           | 0          |
| trnV(gta)  | tRNA | 2200  | 2267  | +      | 68             |                |               | tac       | -1         |
| rrnL       | rRNA | 2267  | 3848  | +      | 1582           |                |               |           | +1         |
| trnL2(tta) | tRNA | 3850  | 3924  | +      | 75             |                |               | taa       | +1         |
| nad1       | PCG  | 3926  | 4882  | +      | 957            | ATG            | TAA           |           | -1         |
| trnI(atc)  | tRNA | 4882  | 4950  | +      | 69             |                |               | gat       | -3         |
| trnQ(caa)  | tRNA | 4948  | 5020  | -      | 73             |                |               | ttg       | +1         |
| trnM(atg)  | tRNA | 5022  | 5090  | +      | 69             |                |               | cat       | 0          |
| nad2       | PCG  | 5091  | 6134  | +      | 1044           | ATA            | TAG           |           | -2         |
| trnW(tga)  | tRNA | 6133  | 6200  | +      | 68             |                |               | tca       | +7         |
| trnA(gca)  | tRNA | 6208  | 6276  | -      | 69             |                |               | tgc       | 0          |
| trnN(aac)  | tRNA | 6277  | 6349  | -      | 73             |                |               | ggt       | +2         |
| OL         |      | 6352  | 6383  | +      | 32             |                |               |           | -1         |
| trnC(tgc)  | tRNA | 6383  | 6449  | -      | 67             |                |               | gca       | 0          |
| trnY(tac)  | tRNA | 6450  | 6516  | -      | 67             |                |               | gta       | +2         |
| cox1       | PCG  | 6518  | 8062  | +      | 1545           | ATG            | TAA           |           | -2         |
| trnS2(tca) | tRNA | 8060  | 8128  | -      | 69             |                |               | tga       | +6         |
| trnD(gac)  | tRNA | 8135  | 8201  | +      | 67             |                |               | gtc       | 0          |
| cox2       | PCG  | 8202  | 8885  | +      | 684            | ATG            | TAA           |           | +3         |
| trnK(aaa)  | tRNA | 8889  | 8955  | +      | 67             |                |               | ttt       | +2         |
| atp8       | PCG  | 8958  | 9161  | +      | 204            | ATG            | TAA           |           | -43        |
| atp6       | PCG  | 9119  | 9799  | +      | 681            | ATG            | TAA           |           | -1         |
| cox3       | PCG  | 9799  | 10583 | +      | 785            | ATG            | TA-           |           | -1         |
| trnG(gga)  | tRNA | 10583 | 10651 | +      | 69             |                |               | tcc       | 0          |
| nad3       | PCG  | 10652 | 10999 | +      | 348            | ATA            | TA-           |           | -1         |
| trnR(cga)  | tRNA | 10999 | 11067 | +      | 69             |                |               | tcg       | 0          |
| nad4l      | PCG  | 11068 | 11364 | +      | 297            | ATG            | TAA           |           | -7         |
| nad4       | PCG  | 11358 | 12735 | +      | 1378           | ATG            | T--           |           | 0          |
| trnH(cac)  | tRNA | 12736 | 12804 | +      | 69             |                |               | gtg       | 0          |
| trnS1(agg) | tRNA | 12805 | 12863 | +      | 59             |                |               | gct       | 0          |
| trnL1(cta) | tRNA | 12864 | 12933 | +      | 70             |                |               | tag       | 0          |
| nad5       | PCG  | 12934 | 14763 | +      | 1830           | ATA            | TAA           |           | -26        |
| nad6       | PCG  | 14738 | 15265 | -      | 528            | ATG            | TAA           |           | 0          |
| trnE(gaa)  | tRNA | 15266 | 15334 | -      | 69             |                |               | ttc       | +4         |
| cob        | PCG  | 15339 | 16478 | +      | 1140           | ATG            | AGA           |           | 0          |
| trnT(aca)  | tRNA | 16479 | 16550 | +      | 72             |                |               | tgt       | -1         |
| trnP(cca)  | tRNA | 16550 | 16615 | -      | 66             |                |               | tgg       |            |

Table S4. Mitochondrial genome of panda bear *Ailuropoda melanoleuca* assembled from scat sample SRR6109208. Features and annotation.

| Name  | Type | Start | Stop  | Strand | Length (bp) | Start | Stop | Anticodon | Continuity |
|-------|------|-------|-------|--------|-------------|-------|------|-----------|------------|
| CR    |      | 1     | 1335  | +      | 1335        |       |      |           |            |
| OH    |      | 695   | 1004  | +      | 310         |       |      |           |            |
| trnF  | tRNA | 1336  | 1404  | +      | 69          |       |      |           | 0          |
| rrnS  | rRNA | 1405  | 2370  | +      | 966         |       |      |           | 0          |
| trnV  | tRNA | 2371  | 2438  | +      | 68          |       |      |           | +1         |
| rrnL  | rRNA | 2440  | 4019  | +      | 1580        |       |      |           | +1         |
| trnL2 | tRNA | 4021  | 4095  | +      | 75          |       |      |           | +1         |
| nad1  | pcg  | 4097  | 5053  | +      | 957         | ATG   | TAA  |           | -1         |
| trnI  | tRNA | 5053  | 5121  | +      | 69          |       |      |           | -3         |
| trnQ  | tRNA | 5119  | 5191  | -      | 73          |       |      |           | +1         |
| trnM  | tRNA | 5193  | 5261  | +      | 69          |       |      |           | 0          |
| nad2  | pcg  | 5262  | 6305  | +      | 1044        | ATA   | TAG  |           | -2         |
| trnW  | tRNA | 6304  | 6371  | +      | 68          |       |      |           | +7         |
| trnA  | tRNA | 6379  | 6447  | -      | 69          |       |      |           | 0          |
| trnN  | tRNA | 6448  | 6520  | -      | 73          |       |      |           | 2          |
| OL    |      | 6523  | 6554  | +      | 32          |       |      |           | -1         |
| trnC  | tRNA | 6554  | 6620  | -      | 67          |       |      |           | 0          |
| trnY  | tRNA | 6621  | 6687  | -      | 67          |       |      |           | +1         |
| cox1  | pcg  | 6689  | 8233  | +      | 1545        | ATG   | TAA  |           | -3         |
| trnS2 | tRNA | 8231  | 8299  | -      | 69          |       |      |           | +6         |
| trnD  | tRNA | 8306  | 8372  | +      | 67          |       |      |           | 0          |
| cox2  | pcg  | 8373  | 9056  | +      | 684         | ATG   | TAA  |           | +3         |
| trnK  | tRNA | 9060  | 9126  | +      | 67          |       |      |           | +2         |
| atp8  | pcg  | 9129  | 9332  | +      | 204         | ATG   | TAA  |           | -43        |
| atp6  | pcg  | 9290  | 9970  | +      | 681         | ATG   | TAA  |           | -1         |
| cox3  | pcg  | 9970  | 10753 | +      | 784         | ATG   | T--  |           | 0          |
| trnG  | tRNA | 10754 | 10822 | +      | 69          |       |      |           | 0          |
| nad3  | pcg  | 10823 | 11169 | +      | 347         | ATA   | TA-  |           | 0          |
| trnR  | tRNA | 11170 | 11238 | +      | 69          |       |      |           | 0          |
| nad4l | pcg  | 11239 | 11535 | +      | 297         | ATG   | TAA  |           | -7         |
| nad4  | pcg  | 11529 | 12906 | +      | 1378        | ATG   | T--  |           | 0          |
| trnH  | tRNA | 12907 | 12975 | +      | 69          |       |      |           | 0          |
| trnS1 | tRNA | 12976 | 13034 | +      | 59          |       |      |           | 0          |
| trnL1 | tRNA | 13035 | 13104 | +      | 70          |       |      |           | 0          |
| nad5  | pcg  | 13105 | 14934 | +      | 1830        | ATT   | TAA  |           | -26        |
| nad6  | pcg  | 14909 | 15436 | -      | 528         | ATG   | TAA  |           | 0          |
| trnE  | tRNA | 15437 | 15505 | -      | 69          |       |      |           | +4         |
| cob   | pcg  | 15510 | 16649 | +      | 1140        | ATG   | AGA  |           | 0          |
| trnT  | tRNA | 16650 | 16721 | +      | 72          |       |      |           | -1         |
| trnP  | tRNA | 16721 | 16786 | -      | 66          |       |      |           |            |

Table S5. Mitochondrial genome of panda bear *Ailuropoda melanoleuca* assembled from scat sample SRR6109209. Features and annotation.

| Name        | Type | Start | Stop  | Strand | Length (bp) |     | Start | Stop | Anticodon | Continuity |
|-------------|------|-------|-------|--------|-------------|-----|-------|------|-----------|------------|
| CR          |      | 1     | 1226  | +      | 1226        |     |       |      | 0         |            |
| trnF        | tRNA | 1227  | 1295  | +      | 69          |     |       |      | 0         |            |
| rrnS        | rRNA | 1296  | 2261  | +      | 966         |     |       |      | 0         |            |
| trnV(gta)   | tRNA | 2262  | 2329  | +      | 68          |     |       |      | -1        |            |
| rrnL        | rRNA | 2329  | 3910  | +      | 1581        |     |       |      | +1        |            |
| trnL2 (tta) | tRNA | 3912  | 3986  | +      | 75          |     |       |      | +7        |            |
| nad1        | PCG  | 3994  | 4944  | +      | 951         | ATA | TAA   |      | 0         |            |
| trnI (atc)  | tRNA | 4944  | 5012  | +      | 69          |     |       |      | -3        |            |
| trnQ (caa)  | tRNA | 5010  | 5082  | +      | 73          |     |       |      | +1        |            |
| trnM (atg)  | tRNA | 5084  | 5151  | +      | 68          |     |       |      | +1        |            |
| nad2        | PCG  | 5153  | 6196  | +      | 1044        | ATA | TAG   |      | -2        |            |
| trnW (tga)  | tRNA | 6195  | 6262  | +      | 67          |     |       |      | +7        |            |
| trnA (gca)  | tRNA | 6270  | 6338  | -      | 69          |     |       |      | 0         |            |
| trnN (aac)  | tRNA | 6339  | 6411  | -      | 73          |     |       |      | +3        |            |
| trnC (tgc)  | tRNA | 6445  | 6511  | -      | 67          |     |       |      | 0         |            |
| trnY (tac)  | tRNA | 6512  | 6578  | -      | 67          |     |       |      | +1        |            |
| cox1        | PCG  | 6580  | 8124  | +      | 1545        | ATG | TAA   |      | -3        |            |
| trnS2(tca)  | tRNA | 8122  | 8190  | -      | 69          |     |       |      |           |            |
| trnD (gac)  | tRNA | 8197  | 8263  | +      | 67          |     |       |      | 0         |            |
| cox2        | PCG  | 8264  | 8947  | +      | 684         | ATG | TAA   |      | +3        |            |
| trnK (aaa)  | tRNA | 8951  | 9017  | +      | 67          |     |       |      | +2        |            |
| atp8        | PCG  | 9020  | 9223  | +      | 204         | ATG | TAA   |      | -43       |            |
| atp6        | PCG  | 9181  | 9861  | +      | 681         | ATG | TAA   |      | +1        |            |
| cox3        | PCG  | 9861  | 10644 | +      | 784         | ATG | T- -  |      | 0         |            |
| trnG (gga)  | tRNA | 10645 | 10713 | +      | 69          |     |       |      | 0         |            |
| nad3        | PCG  | 10714 | 11060 | +      | 347         | ATA | TA-   |      | 0         |            |
| trnR (cga)  | tRNA | 11061 | 11129 | +      | 69          |     |       |      |           |            |
| nad4l       | PCG  | 11130 | 11426 | +      | 297         | ATG | TAA   |      | -6        |            |
| nad4        | PCG  | 11420 | 12797 | +      | 1378        | ATG | T- -  |      | 0         |            |
| trnH (cac)  | tRNA | 12798 | 12866 | +      | 59          |     |       |      | 0         |            |
| trnS1 (agc) | tRNA | 12867 | 12925 | +      | 59          |     |       |      | 0         |            |
| trnL1 (cta) | tRNA | 12996 | 12995 | +      | 70          |     |       |      | 0         |            |
| nad5        | PCG  | 12996 | 14825 | +      | 23          | ATT | TAA   |      | -25       |            |
| nad6        | PCG  | 14800 | 15435 | -      | 528         | ATG | TAA   |      | 0         |            |
| trnE (gaa)  | tRNA | 15436 | 15555 | -      | 120         |     |       |      | 0         |            |
| cob         | PCG  | 15401 | 16540 | +      | 1140        | ATG | AGA   |      | +9        |            |
| trnT (aca)  | tRNA | 16541 | 16612 | +      | 71          |     |       |      | 0         |            |
| trnP (cca)  | tRNA | 16612 | 16677 | -      | 66          |     |       |      |           |            |

Table S6. Mitochondrial genome of panda bear *Ailuropoda melanoleuca* assembled from scat sample SRR6109210. Features and annotation.

| Name        | Type | Start | Stop  | Strand | Length (bp) | Start | Stop  | Anticodon | Continuity |
|-------------|------|-------|-------|--------|-------------|-------|-------|-----------|------------|
| CR          |      | 1     | 1452  | +      | 1452        |       |       |           |            |
| OH          |      | 696   | 1070  | +      | 375         |       |       |           |            |
| trnF (gaa)  | tRNA | 1402  | 1470  | +      | 69          |       |       |           | 0          |
| rrnS        | rRNA | 1471  | 2436  | +      | 966         |       |       |           | 0          |
| trnV (tac)  | tRNA | 2437  | 2504  | +      | 68          |       |       |           | +1         |
| rrnL        | rRNA | 2506  | 4085  | +      | 1580        |       |       |           | +1         |
| trnL2 (taa) | tRNA | 4087  | 4161  | +      | 75          |       |       |           | +1         |
| nad1        | PCG  | 4163  | 5119  | +      | 957         | ATG   | TAA   |           | -1         |
| trnI (gat)  | tRNA | 5119  | 5187  | +      | 69          |       |       |           | -3         |
| trnQ (ttg)  | tRNA | 5185  | 5257  | -      | 73          |       |       |           | +1         |
| trnM (cat)  | tRNA | 5259  | 5327  | +      | 69          |       |       |           | 0          |
| nad2        | PCG  | 5328  | 6371  | +      | 1044        | ATA   | TAG   |           | -2         |
| trnW (tca)  | tRNA | 6370  | 6437  | +      | 68          |       |       |           | +7         |
| trnA (tgc)  | tRNA | 6445  | 6513  | -      | 69          |       |       |           | 0          |
| trnN (gtt)  | tRNA | 6514  | 6586  | -      | 73          |       |       |           | +2         |
| OL          |      | 6589  | 6620  | +      | 67          |       |       |           | -1         |
| trnC (gca)  | tRNA | 6620  | 6686  | -      | 67          |       |       |           | 0          |
| trnY (gta)  | tRNA | 6687  | 6753  | -      | 67          |       |       |           | +1         |
| cox1        | PCG  | 6755  | 8299  | +      | 1545        | ATG   | TAA   |           | -3         |
| trnS2 (tga) | tRNA | 8297  | 8365  | -      | 69          |       |       |           | +6         |
| trnD (gtc)  | tRNA | 8372  | 8438  | +      | 67          |       |       |           | 0          |
| cox2        | PCG  | 8439  | 9122  | +      | 684         | ATG   | TAA   |           | +3         |
| trnK(ttt)   | tRNA | 9126  | 9192  | +      | 67          |       |       |           | +2         |
| atp8        | PCG  | 9195  | 9398  | +      | 204         | ATG   | TAA   |           | -43        |
| atp6        | PCG  | 9356  | 10036 | +      | 681         | ATG   | TAA   |           | -1         |
| cox3        | PCG  | 10036 | 10819 | +      | 784         | ATG   | T - - |           | 0          |
| trnG (tcc)  | tRNA | 10820 | 10888 | +      | 69          |       |       |           | 0          |
| nad3        | PCG  | 10889 | 11235 | +      | 347         | ATA   | TA-   |           | 0          |
| trnR (tcg)  | tRNA | 11236 | 11304 | +      | 69          |       |       |           | 0          |
| nad4l       | PCG  | 11305 | 11601 | +      | 297         | ATG   | TAA   |           | -7         |
| nad4        | PCG  | 11595 | 12972 | +      | 1378        | ATG   | T - - |           | 0          |
| trnH (gtg)  | tRNA | 12973 | 13041 | +      | 69          |       |       |           | 0          |
| trnS1 (gct) | tRNA | 13042 | 13100 | +      | 59          |       |       |           | 0          |
| trnL1 (tag) | tRNA | 13101 | 13170 | +      | 70          |       |       |           | 0          |
| nad5        | PCG  | 13171 | 15000 | +      | 1830        | ATT   | TAA   |           | -26        |
| nad6        | PCG  | 14975 | 15502 | -      | 528         | ATG   | TAA   |           | 0          |
| trnE (ttc)  | tRNA | 15503 | 15571 | -      | 69          |       |       |           | +4         |
| cob         | PCG  | 15576 | 16715 | +      | 1140        | ATG   | AGA   |           | 0          |
| trnT (tgt)  | tRNA | 16716 | 16787 | +      | 72          |       |       |           | -1         |
| trnP (tgg)  | tRNA | 16787 | 16852 | -      | 66          |       |       |           |            |

Table S7. Mitochondrial genome of panda bear *Ailuropoda melanoleuca* assembled from scat sample SRR6109211. Features and annotation.

| Name       | Type | Start | Stop  | Strand | Length<br>(bp) | Start<br>Codon | Stop<br>Codon | Anticodon | Continuity |
|------------|------|-------|-------|--------|----------------|----------------|---------------|-----------|------------|
| CR         |      | 1     | 1164  | +      | 1165           |                |               |           |            |
| OH         |      | 271   | 666   | +      | 396            |                |               |           |            |
| trnF(ttc)  | tRNA | 1165  | 1233  | +      | 69             |                |               | gaa       | 0          |
| rrnS       | rRNA | 1234  | 2199  | +      | 966            |                |               |           | 0          |
| trnV(gta)  | tRNA | 2200  | 2267  | +      | 68             |                |               | tac       | -1         |
| rrnL       | rRNA | 2267  | 3848  | +      | 1582           |                |               |           | +1         |
| trnL2(tta) | tRNA | 3850  | 3924  | +      | 75             |                |               | taa       | +1         |
| nad1       | PCG  | 3926  | 4882  | +      | 957            | ATG            | TAA           |           | -1         |
| trnI(atc)  | tRNA | 4882  | 4950  | +      | 69             |                |               | gat       | -3         |
| trnQ(caa)  | tRNA | 4948  | 5020  | -      | 73             |                |               | ttg       | +1         |
| trnM(atg)  | tRNA | 5022  | 5090  | +      | 69             |                |               | cat       | 0          |
| nad2       | PCG  | 5091  | 6134  | +      | 1044           | ATA            | TAG           |           | -2         |
| trnW(tga)  | tRNA | 6133  | 6200  | +      | 68             |                |               | tca       | +7         |
| trnA(gca)  | tRNA | 6208  | 6276  | -      | 69             |                |               | tgc       | 0          |
| trnN(aac)  | tRNA | 6277  | 6349  | -      | 73             |                |               | ggt       | +2         |
| OL         |      | 6352  | 6383  | +      | 32             |                |               |           | -1         |
| trnC(tgc)  | tRNA | 6383  | 6449  | -      | 67             |                |               | gca       | 0          |
| trnY(tac)  | tRNA | 6450  | 6516  | -      | 67             |                |               | gta       | +2         |
| cox1       | PCG  | 6518  | 8062  | +      | 1545           | ATG            | TAA           |           | -2         |
| trnS2(tca) | tRNA | 8060  | 8128  | -      | 69             |                |               | tga       | +6         |
| trnD(gac)  | tRNA | 8135  | 8201  | +      | 67             |                |               | gtc       | 0          |
| cox2       | PCG  | 8202  | 8885  | +      | 684            | ATG            | TAA           |           | +3         |
| trnK(aaa)  | tRNA | 8889  | 8955  | +      | 67             |                |               | ttt       | +2         |
| atp8       | PCG  | 8958  | 9161  | +      | 204            | ATG            | TAA           |           | -43        |
| atp6       | PCG  | 9119  | 9799  | +      | 681            | ATG            | TAA           |           | -1         |
| cox3       | PCG  | 9799  | 10583 | +      | 785            | ATG            | TA-           |           | -1         |
| trnG(gga)  | tRNA | 10583 | 10651 | +      | 69             |                |               | tcc       | 0          |
| nad3       | PCG  | 10652 | 10999 | +      | 348            | ATA            | TA-           |           | -1         |
| trnR(cga)  | tRNA | 10999 | 11067 | +      | 69             |                |               | tcg       | 0          |
| nad4l      | PCG  | 11068 | 11364 | +      | 297            | ATG            | TAA           |           | -7         |
| nad4       | PCG  | 11358 | 12735 | +      | 1378           | ATG            | T--           |           | 0          |
| trnH(cac)  | tRNA | 12736 | 12804 | +      | 69             |                |               | gtg       | 0          |
| trnS1(agg) | tRNA | 12805 | 12863 | +      | 59             |                |               | gct       | 0          |
| trnL1(cta) | tRNA | 12864 | 12933 | +      | 70             |                |               | tag       | 0          |
| nad5       | PCG  | 12934 | 14763 | +      | 1830           | ATA            | TAA           |           | -26        |
| nad6       | PCG  | 14738 | 15265 | -      | 528            | ATG            | TAA           |           | 0          |
| trnE(gaa)  | tRNA | 15266 | 15334 | -      | 69             |                |               | ttc       | +4         |
| cob        | PCG  | 15339 | 16478 | +      | 1140           | ATG            | AGA           |           | 0          |
| trnT(aca)  | tRNA | 16479 | 16550 | +      | 72             |                |               | tgt       | -1         |
| trnP(cca)  | tRNA | 16550 | 16615 | -      | 66             |                |               | tgg       |            |

Table S8. Mitochondrial genome of panda bear *Ailuropoda melanoleuca* assembled from scat sample SRR6109216. Features and annotation.

| Name       | Type | Start | Stop  | Strand | Length (bp) | Start | Stop | Anticodon | Continuity |
|------------|------|-------|-------|--------|-------------|-------|------|-----------|------------|
| Control    |      | 1     | 1316  |        |             |       |      |           | 0          |
| OH         |      | 695   | 988   | +      | 294         |       |      |           | 0          |
| trnF(gaa)  | tRNA | 1317  | 1385  | +      | 69          |       |      |           | 0          |
| rrnS       | rRNA | 1386  | 2351  | +      | 966         |       |      |           | 0          |
| trnV(tac)  | tRNA | 2352  | 2419  | +      | 68          |       |      |           | +1         |
| rrnL       | rRNA | 2421  | 4000  | +      | 1580        |       |      |           | +1         |
| trnL2(taa) | tRNA | 4002  | 4076  | +      | 75          |       |      |           | +1         |
| nad1       | PCG  | 4078  | 5034  | +      | 957         | ATG   | TAA  |           | -1         |
| trnI(gat)  | tRNA | 5034  | 5102  | +      | 69          |       |      |           | -3         |
| trnQ(ttg)  | tRNA | 5100  | 5172  | -      | 73          |       |      |           | +1         |
| trnM(cat)  | tRNA | 5174  | 5242  | +      | 69          |       |      |           | 0          |
| nad2       | PCG  | 5243  | 6286  | +      | 1044        | ATA   | TAG  |           | -2         |
| trnW(tca)  | tRNA | 6285  | 6352  | +      | 68          |       |      |           | +7         |
| trnA(tgc)  | tRNA | 6360  | 6428  | -      | 69          |       |      |           | 0          |
| trnN(gtt)  | tRNA | 6429  | 6501  | -      | 73          |       |      |           | +2         |
| OL         |      | 6504  | 6535  | +      | 32          |       |      |           | -1         |
| trnC(gca)  | tRNA | 6535  | 6601  | -      | 67          |       |      |           | 0          |
| trnY(gta)  | tRNA | 6602  | 6668  | -      | 67          |       |      |           | +1         |
| cox1       | PCG  | 6670  | 8214  | +      | 1545        | ATG   | TAA  |           | -3         |
| trnS2(tga) | tRNA | 8212  | 8280  | -      | 69          |       |      |           | +6         |
| trnD(gtc)  | tRNA | 8287  | 8353  | +      | 67          |       |      |           | 0          |
| cox2       | PCG  | 8354  | 9037  | +      | 684         | ATG   | TAA  |           | +3         |
| trnK(ttt)  | tRNA | 9041  | 9107  | +      | 67          |       |      |           | +2         |
| atp8       | PCG  | 9110  | 9313  | +      | 204         | ATG   | TAA  |           | -43        |
| atp6       | PCG  | 9271  | 9951  | +      | 681         | ATG   | TAA  |           | -1         |
| cox3       | PCG  | 9951  | 10734 | +      | 784         | ATG   | T-   |           | 0          |
| trnG(tcc)  | tRNA | 10735 | 10803 | +      | 69          |       |      |           | 0          |
| nad3       | PCG  | 10804 | 11150 | +      | 347         | ATA   | TA-  |           | 0          |
| trnR(tcg)  | tRNA | 11151 | 11219 | +      | 69          |       |      |           | 0          |
| nad4l      | PCG  | 11220 | 11516 | +      | 297         | ATG   | TAA  |           | -7         |
| nad4       | PCG  | 11510 | 12887 | +      | 1378        | ATG   | T-   |           | 0          |
| trnH(gtg)  | tRNA | 12888 | 12956 | +      | 69          |       |      |           | 0          |
| trnS1(gct) | tRNA | 12957 | 13015 | +      | 59          |       |      |           | 0          |
| trnL1(tag) | tRNA | 13016 | 13085 | +      | 70          |       |      |           | -9         |
| nad5       | PCG  | 13086 | 14915 | +      | 1830        | ATT   | TAA  |           | -26        |
| nad6       | PCG  | 14890 | 15417 | -      | 528         | ATG   | TAA  |           | 0          |
| trnE(ttc)  | tRNA | 15418 | 15486 | -      | 69          |       |      |           | +4         |
| cob        | PCG  | 15491 | 16630 | +      | 1140        | ATG   | AGA  |           | 0          |
| trnT(tgt)  | tRNA | 16631 | 16702 | +      | 72          |       |      |           | -1         |
| trnP(tgg)  | tRNA | 16702 | 16767 | -      | 66          |       |      |           |            |



Table S9. Mitochondrial genome of Java pangolin *Manis javanica* assembled from scat sample SRR7477311. Features and annotation.

| Name         | Type       | Start         | Stop          | Strand | Length (bp) | Start      | Stop       | Anticodon | Continuity |
|--------------|------------|---------------|---------------|--------|-------------|------------|------------|-----------|------------|
| trnF(gaa)    | tRNA       | 1             | 68            | +      | 68          |            |            |           | 0          |
| rrnS         | rRNA       | 69            | 1029          | +      | 961         |            |            |           | -1         |
| trnV(tac)    | tRNA       | 1029          | 1094          | +      | 66          |            |            |           | 0          |
| rrnL         | rRNA       | 1095          | 2665          | +      | 1571        |            |            |           | 0          |
| trnL2(taa)   | tRNA       | 2666          | 2739          | +      | 74          |            |            |           | 3          |
| <b>nad1</b>  | <b>PCG</b> | <b>2743</b>   | <b>3699</b>   | +      | <b>957</b>  | <b>ATG</b> | <b>TAA</b> |           | <b>-1</b>  |
| trnI(gat)    | tRNA       | 3699          | 3767          | +      | 69          |            |            |           | -3         |
| trnQ(ttg)    | tRNA       | 3765          | 3837          | -      | 73          |            |            |           | 1          |
| trnM(cat)    | tRNA       | 3839          | 3907          | +      | 69          |            |            |           | 0          |
| <b>nad2</b>  | <b>PCG</b> | <b>3908</b>   | <b>4948</b>   | +      | <b>1041</b> | <b>ATA</b> | <b>TAG</b> |           | <b>-2</b>  |
| trnW(tca)    | tRNA       | 4947          | 5013          | +      | 67          |            |            |           | 3          |
| trnA(tgc)    | tRNA       | 5017          | 5085          | -      | 69          |            |            |           | 1          |
| trnN(gtt)    | tRNA       | 5087          | 5159          | -      | 73          |            |            |           | 2          |
| OL           |            | 5162          | 5193          | +      | 32          |            |            |           | -1         |
| trnC(gca)    | tRNA       | 5193          | 5257          | -      | 65          |            |            |           | 0          |
| trnY(gta)    | tRNA       | 5258          | 5324          | -      | 67          |            |            |           | 1          |
| <b>cox1</b>  | <b>PCG</b> | <b>5326</b>   | <b>6876</b>   | +      | <b>1551</b> | <b>ATG</b> | <b>AGA</b> |           | <b>-5</b>  |
| trnS2(tga)   | tRNA       | 6872          | 6940          | -      | 69          |            |            |           | 7          |
| trnD(gtc)    | tRNA       | 6948          | 7014          | +      | 67          |            |            |           | 0          |
| <b>cox2</b>  | <b>PCG</b> | <b>7015</b>   | <b>7698</b>   | +      | <b>684</b>  | <b>ATG</b> | <b>TAA</b> |           | <b>2</b>   |
| trnK(aaa)    | tRNA       | 7701          | 7764          | +      | 64          |            |            |           | 1          |
| <b>atp8</b>  | <b>PCG</b> | <b>7766</b>   | <b>7966</b>   | +      | <b>201</b>  | <b>ATG</b> | <b>TAA</b> |           | <b>-40</b> |
| <b>atp6</b>  | <b>PCG</b> | <b>7927</b>   | <b>8607</b>   | +      | <b>681</b>  | <b>ATG</b> | <b>TAA</b> |           | <b>-1</b>  |
| <b>cox3</b>  | <b>PCG</b> | <b>8607</b>   | <b>9391</b>   | +      | <b>785</b>  | <b>ATG</b> | <b>TA-</b> |           | <b>-1</b>  |
| trnG(tcc)    | tRNA       | 9391          | 9459          | +      | 69          |            |            |           | 0          |
| nad3         | PCG        | 9460          | 9806          | +      | 347         | ATA        | TA-        |           | 0          |
| trnR(tcg)    | tRNA       | 9807          | 9873          | +      | 67          |            |            |           | 0          |
| <b>nad4l</b> | <b>PCG</b> | <b>9874</b>   | <b>10,170</b> | +      | <b>297</b>  | <b>ATG</b> | <b>TAA</b> |           | <b>-7</b>  |
| <b>nad4</b>  | <b>PCG</b> | <b>10,164</b> | <b>11,541</b> | +      | <b>1378</b> | <b>ATG</b> | <b>T--</b> |           | <b>0</b>   |
| trnH(gtg)    | tRNA       | 11,542        | 11,609        | +      | 68          |            |            |           | 0          |
| trnS1(gct)   | tRNA       | 11,610        | 11,668        | +      | 59          |            |            |           | 1          |
| trnL1(tag)   | tRNA       | 11,670        | 11,740        | +      | 71          |            |            |           | 0          |
| <b>nad5</b>  | <b>PCG</b> | <b>11,741</b> | <b>13,561</b> | +      | <b>1821</b> | <b>ATT</b> | <b>TAA</b> |           | <b>-17</b> |
| <b>nad6</b>  | <b>PCG</b> | <b>13,545</b> | <b>14,069</b> | -      | <b>525</b>  | <b>ATG</b> | <b>AGA</b> |           | <b>0</b>   |
| trnE(ttc)    | tRNA       | 14,070        | 14,138        | -      | 69          |            |            |           | 3          |
| <b>cob</b>   | <b>PCG</b> | <b>14,142</b> | <b>15,281</b> | +      | <b>1140</b> | <b>ATG</b> | <b>AGA</b> |           | <b>0</b>   |
| trnT(tgt)    | tRNA       | 15,282        | 15,348        | +      | 67          |            |            |           | -1         |
| trnP(tgg)    | tRNA       | 15,348        | 15,413        | -      | 66          |            |            |           | 161        |
| OH           |            | 15,575        | 16,012        | +      | 438         |            |            |           | 0          |
| CR           |            | 16,013        | 16,576        |        | 564         |            |            |           |            |

Table S10. Mitochondrial genome of Java pangolin *Manis javanica* assembled from scat sample SRR7498027. Features and annotation.

| Name       | Type | Start | Stop  | Strand | Length (bp) | Start | Stop | Anticodon | Continuity |
|------------|------|-------|-------|--------|-------------|-------|------|-----------|------------|
| trnF(ttc)  | tRNA | 1     | 68    | +      | 68          |       |      |           | 0          |
| rrnS       | rRNA | 69    | 1029  | +      | 961         |       |      |           | 0          |
| trnV(gta)  | tRNA | 1029  | 1094  | +      | 66          |       |      |           | -1         |
| rrnL       | rRNA | 1093  | 2665  | +      | 1573        |       |      |           | -2         |
| trnL2(tta) | tRNA | 2666  | 2739  | +      | 74          |       |      |           | 0          |
| nad1       | PCG  | 2743  | 3700  | +      | 958         | ATG   | TAA  |           | +3         |
| trnI(atc)  | tRNA | 3699  | 3767  | +      | 69          |       |      |           | -2         |
| trnQ(caa)  | tRNA | 3765  | 3837  | -      | 73          |       |      |           | -3         |
| trnM(atg)  | tRNA | 3839  | 3907  | +      | 69          |       |      |           | +1         |
| nad2       | PCG  | 3908  | 4948  | +      | 1041        | ATA   | TAG  |           | 0          |
| trnW(tga)  | tRNA | 4947  | 5013  | +      | 67          |       |      |           | -2         |
| trnA(gca)  | tRNA | 5017  | 5085  | -      | 69          |       |      |           | +3         |
| trnN(aac)  | tRNA | 5087  | 5159  | -      | 73          |       |      |           | +1         |
| trnC(tgc)  | tRNA | 5193  | 5257  | -      | 65          |       |      |           | +33        |
| trnY(tac)  | tRNA | 5258  | 5324  | -      | 67          |       |      |           | 0          |
| cox1       | PCG  | 5326  | 6876  | +      | 1551        | ATG   | AGA  |           | +1         |
| trnS2(tca) | tRNA | 6872  | 6940  | -      | 69          |       |      |           | -3         |
| trnD(gac)  | tRNA | 6948  | 7014  | +      | 67          |       |      |           | +7         |
| cox2       | PCG  | 7015  | 7698  | +      | 684         | ATG   | TAA  |           | 0          |
| trnK(aaa)  | tRNA | 7701  | 7764  | +      | 64          |       |      |           | +2         |
| atp8       | PCG  | 7766  | 7969  | +      | 203         | ATG   | TAA  |           | +1         |
| atp6       | PCG  | 7927  | 8607  | +      | 681         | ATG   | TAA  |           | -43        |
| cox3       | PCG  | 8607  | 9391  | +      | 785         | ATG   | TA-  |           | -1         |
| trnG(gga)  | tRNA | 9391  | 9459  | +      | 69          |       |      |           | -1         |
| nad3       | PCG  | 9460  | 9806  | +      | 347         | ATA   | TA-  |           | 0          |
| trnR(cga)  | tRNA | 9807  | 9873  | +      | 67          |       |      |           | 0          |
| nad4l      | PCG  | 9874  | 10170 | +      | 297         | ATG   | TAA  |           | 0          |
| nad4       | PCG  | 10164 | 11541 | +      | 1378        | ATG   | T--  |           | -3         |
| trnH(cac)  | tRNA | 11542 | 11609 | +      | 68          |       |      |           | 0          |
| trnS1(agg) | tRNA | 11610 | 11668 | +      | 59          |       |      |           | 0          |
| trnL1(cta) | tRNA | 11670 | 11740 | +      | 71          |       |      |           | +1         |
| nad5       | PCG  | 11741 | 13561 | +      | 1821        | ATT   | TAA  |           | 0          |
| nad6       | PCG  | 13545 | 14069 | -      | 525         | ATG   | AGA  |           | -17        |
| trnE(gaa)  | tRNA | 14070 | 14138 | -      | 69          |       |      |           | 0          |
| cob        | PCG  | 14142 | 15281 | +      | 1140        | ATG   | AGA  |           | +3         |
| trnT(aca)  | tRNA | 15282 | 15348 | +      | 67          |       |      |           | 0          |
| trnP(cca)  | tRNA | 15348 | 15413 | -      | 66          |       |      |           | -1         |
| OH         |      | 15575 | 16012 | +      | 438         |       |      |           |            |

Table S11. Mitochondrial genome of Java pangolin *Manis javanica* assembled from scat sample SRR7507293. Features and annotation.

| Name       | Type | Start | Stop  | Strand | Length (bp) | Start | Stop  | Anticodon | Continuity |
|------------|------|-------|-------|--------|-------------|-------|-------|-----------|------------|
| trnF(gaa)  | tRNA | 1     | 68    | +      | 68          |       |       |           | 0          |
| rrnS       | rRNA | 69    | 1029  | +      | 961         |       |       |           | -1         |
| trnV(tac)  | tRNA | 1029  | 1094  | +      | 66          |       |       |           | 0          |
| rrnL       | rRNA | 1095  | 2665  | +      | 1571        |       |       |           | 0          |
| trnL2(taa) | tRNA | 2666  | 2739  | +      | 74          |       |       |           | +3         |
| nad1       | PCG  | 2743  | 3699  | +      | 957         | ATG   | TAA   |           | -1         |
| trnI(gat)  | tRNA | 3699  | 3767  | +      | 69          |       |       |           | -3         |
| trnQ(ttg)  | tRNA | 3765  | 3837  | -      | 73          |       |       |           | +1         |
| trnM(cat)  | tRNA | 3839  | 3907  | +      | 69          |       |       |           | 0          |
| nad2       | PCG  | 3908  | 4948  | +      | 1041        | ATA   | TAG   |           | -2         |
| trnW(tca)  | tRNA | 4947  | 5013  | +      | 67          |       |       |           | +3         |
| trnA(tgc)  | tRNA | 5017  | 5085  | -      | 69          |       |       |           | +1         |
| trnN(gtt)  | tRNA | 5087  | 5159  | -      | 73          |       |       |           | +2         |
| OL         |      | 5162  | 5193  | +      | 32          |       |       |           | -1         |
| trnC(gca)  | tRNA | 5193  | 5257  | -      | 65          |       |       |           | 0          |
| trnY(gta)  | tRNA | 5258  | 5324  | -      | 67          |       |       |           | +1         |
| cox1       | PCG  | 5326  | 6876  | +      | 1551        | ATG   | AGA   |           | -5         |
| trnS2(tga) | tRNA | 6872  | 6940  | -      | 69          |       |       |           | +7         |
| trnD(gtc)  | tRNA | 6948  | 7014  | +      | 67          |       |       |           | 0          |
| cox2       | PCG  | 7015  | 7698  | +      | 684         | ATG   | TAA   |           | +2         |
| trnK(ttt)  | tRNA | 7701  | 7764  | +      | 64          |       |       |           | +1         |
| atp8       | PCG  | 7766  | 7969  | +      | 204         | ATG   | TAA   |           | -43        |
| atp6       | PCG  | 7927  | 8607  | +      | 681         | ATG   | TAA   |           | -1         |
| cox3       | PCG  | 8607  | 9391  | +      | 785         | ATG   | TA -  |           | -1         |
| trnG(tcc)  | tRNA | 9391  | 9459  | +      | 69          |       |       |           | 0          |
| nad3       | PCG  | 9460  | 9806  | +      | 347         | ATA   | TA -  |           | 0          |
| trnR(tcg)  | tRNA | 9807  | 9873  | +      | 67          |       |       |           | 0          |
| nad4l      | PCG  | 9874  | 10170 | +      | 297         | ATG   | TAA   |           | -7         |
| nad4       | PCG  | 10164 | 11541 | +      | 1378        | ATG   | T - - |           | 0          |
| trnH(gtg)  | tRNA | 11542 | 11609 | +      | 68          |       |       |           | 0          |
| trnS1(gct) | tRNA | 11610 | 11668 | +      | 59          |       |       |           | +1         |
| trnL1(tag) | tRNA | 11670 | 11740 | +      | 71          |       |       |           | 0          |
| nad5       | PCG  | 11741 | 13561 | +      | 1821        | ATT   | TAA   |           | -17        |
| nad6       | PCG  | 13545 | 14069 | -      | 525         | ATG   | AGA   |           | 0          |
| trnE(ttc)  | tRNA | 14070 | 14138 | -      | 69          |       |       |           | +3         |
| cob        | PCG  | 14142 | 15281 | +      | 1140        | ATG   | AGA   |           | 0          |
| trnT(tgt)  | tRNA | 15282 | 15348 | +      | 67          |       |       |           | -1         |
| trnP(tgg)  | tRNA | 15348 | 15413 | -      | 66          |       |       |           | +161       |
| OH         |      | 15575 | 16012 | +      | 438         |       |       |           | -599       |
| CR         |      | 15414 | 16576 |        | 1163        |       |       |           | 0          |

Table S12. Mitochondrial genome of Java pangolin *Manis javanica* assembled from scat sample SRR7524043. Features and annotation.

| Name        | Type       | Start       | Stop        | Strand   | Length (bp) | Start Codon | Stop Codon | Anti-codon | Continuity |
|-------------|------------|-------------|-------------|----------|-------------|-------------|------------|------------|------------|
| trnF(ttc)   | trna       | 1           | 68          | +        | 68          |             |            |            | 0          |
| rrnS        | rrna       | 69          | 1029        | +        | 961         |             |            |            | -1         |
| trnV(gta)   | trna       | 1029        | 1094        | +        | 66          |             |            |            | 0          |
| rrnL        | rrna       | 1095        | 2665        | +        | 1571        |             |            |            | 0          |
| trnL2(tta)  | trna       | 2666        | 2739        | +        | 74          |             |            |            | 3          |
| <b>nad1</b> | <b>PCG</b> | <b>2743</b> | <b>3699</b> | <b>+</b> | <b>957</b>  | <b>ATG</b>  | <b>TAA</b> |            | <b>-1</b>  |
| trnI(atc)   | trna       | 3699        | 3767        | +        | 69          |             |            |            | -3         |
| trnQ(caa)   | trna       | 3765        | 3837        | -        | 73          |             |            |            | 1          |
| trnM(atg)   | trna       | 3839        | 3907        | +        | 69          |             |            |            | 3          |
| <b>nad2</b> | <b>PCG</b> | <b>3908</b> | <b>4948</b> | <b>+</b> | <b>1041</b> | <b>ATA</b>  | <b>TAG</b> |            | <b>-2</b>  |
| rnW(tga)    | rrna       | 4947        | 5013        | +        | 67          |             |            |            | 3          |
| trnA(gca)   | trna       | 5017        | 5085        | -        | 69          |             |            |            | 1          |
| trnN(aac)   | trna       | 5087        | 5159        | -        | 73          |             |            |            | 2          |
| OL          |            | 5162        | 5193        |          | 31          |             |            |            | -1         |
| trnC(tgc)   | trna       | 5193        | 5257        | -        | 65          |             |            |            | 0          |
| trnY(tac)   | trna       | 5258        | 5324        | -        | 67          |             |            |            | 1          |
| <b>cox1</b> | <b>PCG</b> | <b>5326</b> | <b>6876</b> | <b>+</b> | <b>1551</b> | <b>ATG</b>  | <b>AGA</b> |            | <b>-5</b>  |
| trnS2(tca)  | trna       | 6872        | 6940        | -        | 69          |             |            |            | 7          |
| trnD(gac)   | trna       | 6948        | 7014        | +        | 67          |             |            |            | 0          |
| <b>cox2</b> | <b>PCG</b> | <b>7015</b> | <b>7698</b> | <b>+</b> | <b>684</b>  | <b>ATG</b>  | <b>TAA</b> |            | <b>2</b>   |
| trnK(aaa)   | trna       | 7701        | 7764        | +        | 64          |             |            |            | 1          |

|            |      |       |       |   |      |     |     |  |     |
|------------|------|-------|-------|---|------|-----|-----|--|-----|
| atp8       | PCG  | 7766  | 7969  | + | 204  | ATG | TAA |  | -43 |
| atp6       | PCG  | 7927  | 8607  | + | 681  | ATG | TAA |  | -1  |
| cox3       | PCG  | 8607  | 9391  | + | 784  | ATG | TA- |  | -1  |
| trnG(gga)  | trna | 9391  | 9459  | + | 69   |     |     |  | -3  |
| nad3       | PCG  | 9460  | 9805  | + | 345  | ATA | T-  |  | 1   |
| trnR(cga)  | trna | 9807  | 9873  | + | 67   |     |     |  | 0   |
| nad4l      | PCG  | 9874  | 10170 | + | 297  | ATG | TAA |  | -7  |
| nad4       | PCG  | 10164 | 11541 | + | 1378 | ATG | T-  |  | 0   |
| trnH(cac)  | trna | 11542 | 11609 | + | 68   |     |     |  | 0   |
| trnS1(agg) | trna | 11610 | 11668 | + | 58   |     |     |  | 1   |
| trnL1(cta) | trna | 11670 | 11740 | + | 71   |     |     |  | 0   |
| nad5       | PCG  | 11741 | 13561 | + | 1821 | ATA | TAA |  | -17 |
| nad6       | PCG  | 13545 | 14069 | - | 525  | ATG | AGA |  | 0   |
| trnE(gaa)  | trna | 14070 | 14138 | - | 69   |     |     |  | 3   |
| cob        | PCG  | 14142 | 15281 | + | 1139 | ATG | AGA |  | 0   |
| trnT(aca)  | trna | 15282 | 15348 | + | 67   |     |     |  | -1  |
| trnP(cca)  | trna | 15348 | 15413 | - | 66   |     |     |  |     |
| OH         |      | 15575 | 16012 | + | 438  |     |     |  |     |
| CR         |      | 15414 | 16576 |   | 1163 |     |     |  |     |

Table S13. Mitochondrial genome of *Eubalaena glacialis* assembled from scat sample SRR4056912. Features and annotation.

| Name        | Type | Start | Stop | Strand | Length (bp) | Start | Stop | Anticodon | Continuity |
|-------------|------|-------|------|--------|-------------|-------|------|-----------|------------|
| trnF(ttc)   | tRNA | 1     | 73   | +      | 73          |       |      |           | 1          |
| rrnS        | rRNA | 75    | 1048 | +      | 974         |       |      |           | 0          |
| trnV (gta)  | tRNA | 1049  | 1115 | +      | 67          |       |      |           | 0          |
| rrnL        | rRNA | 1116  | 2689 | +      | 1573        |       |      |           | 1          |
| trnL2 (tta) | tRNA | 2691  | 2765 | +      | 75          |       |      |           | -1         |
| nad 1       | PCG  | 2768  | 3724 | +      | 957         | ATG   | TAA  |           | -1         |
| trnI (atc)  | tRNA | 3724  | 3792 | +      | 69          |       |      |           | -3         |
| trnQ (caa)  | tRNA | 3790  | 3862 | -      | 73          |       |      |           | 1          |
| trnM (atg)  | tRNA | 3864  | 3932 | +      | 69          |       |      |           | 0          |
| nad 2       | PCG  | 3933  | 4976 | +      | 1044        | ATA   | TAG  |           | -2         |
| trnW (tga)  | tRNA | 4975  | 5043 | +      | 69          |       |      |           | 5          |
| trnA (gca)  | tRNA | 5049  | 5117 | -      | 69          |       |      |           | 1          |
| trnN (aac)  | tRNA | 5119  | 5192 | -      | 74          |       |      |           | 2          |
| OL          |      | 5195  | 5225 | +      | 31          |       |      |           | -1         |
| trnC (tgc)  | tRNA | 5225  | 5292 | -      | 68          |       |      |           | 0          |
| trnY (tac)  | tRNA | 5293  | 5359 | -      | 67          |       |      |           | 1          |
| cox 1       | PCG  | 5361  | 6911 | +      | 1551        | ATG   | AGA  |           | -5         |
| trnS2 (tca) | tRNA | 6907  | 6975 | -      | 69          |       |      |           | 7          |
| trnD (gac)  | tRNA | 6983  | 7050 | +      | 68          |       |      |           | 0          |
| cox 2       | PCG  | 7051  | 7734 | +      | 684         | ATG   | TAA  |           | 3          |
| trnK (aaa)  | tRNA | 7738  | 7804 | +      | 67          |       |      |           | 1          |
| atp8        | PCG  | 7806  | 7997 | +      | 192         | ATG   | TAA  |           | -4         |
| atp6        | PCG  | 7994  | 8647 | +      | 654         | ATA   | TAA  |           | -1         |
| cox3        | PCG  | 8647  | 9432 | +      | 786         | ATG   | TAG  |           | -1         |

|                   |      |       |       |   |      |     |     |     |
|-------------------|------|-------|-------|---|------|-----|-----|-----|
| trnG (gga)        | tRNA | 9432  | 9500  | + | 69   |     |     | 0   |
| nad3              | PCG  | 9501  | 9847  | + | 347  | ATA | TA- | 0   |
| trnR (cga)        | tRNA | 9848  | 9916  | + | 69   |     |     | 0   |
| nad4l             | PCG  | 9917  | 10213 | + | 297  | GTG | TAA | -7  |
| nad4              | PCG  | 10207 | 11584 | + | 1378 | ATG | T-- | 0   |
| trnH (cac)        | tRNA | 11585 | 11653 | + | 69   |     |     | 0   |
| trnS1 (agc)       | tRNA | 11654 | 11714 | + | 61   |     |     | 1   |
| trnL1 (cta)       | tRNA | 11716 | 11785 | + | 70   |     |     | 0   |
| nad5              | PCG  | 11786 | 13606 | + | 1821 | ATA | TAA | -17 |
| nad6              | PCG  | 13590 | 14117 | - | 528  | ATG | TAA | 0   |
| trnE (gaa)        | tRNA | 14118 | 14186 | - | 69   |     |     | 4   |
| cob               | PCG  | 14191 | 15330 | + | 1140 | ATG | AGA | 0   |
| trnT (aca)        | tRNA | 15331 | 15402 | + | 72   |     |     | -1  |
| trnP (cca)        | tRNA | 15402 | 15468 | - | 67   |     |     | 229 |
| OH                |      | 15698 | 16107 | + | 410  |     |     | 0   |
| Control<br>Region |      | 15468 | 16387 |   | 919  |     |     |     |

---

Table S14. Mitochondrial genome of *Eubalaena glacialis* assembled from scat sample SRR4056914. Features and annotation.

| Name           | Type | Start | Stop  | Strand | Length (bp) | Start | Stop | Anticodon | Continuity |
|----------------|------|-------|-------|--------|-------------|-------|------|-----------|------------|
| trnF(ttc)      | tRNA | 1     | 73    | +      | 73          |       |      |           | +1         |
| rrnS           | rRNA | 75    | 1048  | +      | 974         |       |      |           | 0          |
| trnV(gta)      | tRNA | 1049  | 1115  | +      | 67          |       |      |           | -2         |
| <b>rrnL</b>    | rRNA | 1114  | 2689  | +      | 1576        |       |      |           | +1         |
| trnL2(tta)     | tRNA | 2691  | 2765  | +      | 75          |       |      |           | +2         |
| <b>nad1</b>    | PCG  | 2768  | 3724  | +      | 957         | ATG   | TAA  |           | -1         |
| trnI(atc)      | tRNA | 3724  | 3792  | +      | 69          |       |      |           | -3         |
| trnQ(caa)      | tRNA | 3790  | 3862  | -      | 73          |       |      |           | +1         |
| trnM(atg)      | tRNA | 3864  | 3932  | +      | 69          |       |      |           | 0          |
| <b>nad2</b>    | PCG  | 3933  | 4976  | +      | 1044        | ATA   | TAG  |           | -2         |
| trnW(tga)      | tRNA | 4975  | 5043  | +      | 69          |       |      |           | +5         |
| trnA(gca)      | tRNA | 5049  | 5117  | -      | 69          |       |      |           | +1         |
| trnN(aac)      | tRNA | 5119  | 5192  | -      | 74          |       |      |           | +32        |
| trnC(tgc)      | tRNA | 5225  | 5292  | -      | 68          |       |      |           | 0          |
| trnY(tac)      | tRNA | 5293  | 5359  | -      | 67          |       |      |           | +1         |
| <b>cox1</b>    | PCG  | 5361  | 6911  | +      | 1551        | ATG   | AGA  |           | -5         |
| trnS2(tca)     | tRNA | 6907  | 6975  | -      | 69          |       |      |           | +7         |
| trnD(gac)      | tRNA | 6983  | 7050  | +      | 68          |       |      |           | 0          |
| <b>cox2</b>    | PCG  | 7051  | 7734  | +      | 684         | ATG   | TAA  |           | +3         |
| trnK(aaa)      | tRNA | 7738  | 7804  | +      | 67          |       |      |           | +1         |
| <b>atp8</b>    | PCG  | 7806  | 7997  | +      | 192         | ATG   | TAA  |           | -4         |
| <b>atp6</b>    | PCG  | 7994  | 8647  | +      | 681         | ATG   | TAA  |           | -1         |
| <b>cox3</b>    | PCG  | 8647  | 9432  | +      | 786         | ATG   | TAG  |           | -1         |
| trnG(gga)      | tRNA | 9432  | 9500  | +      | 69          |       |      |           | 0          |
| <b>nad3</b>    | PCG  | 9501  | 9847  | +      | 347         | ATA   | TA-  |           | 0          |
| trnR(cga)      | tRNA | 9848  | 9916  | +      | 69          |       |      |           | 0          |
| <b>nad4l</b>   | PCG  | 9917  | 10213 | +      | 282         | GTG   | TAA  |           | -7         |
| <b>nad4</b>    | PCG  | 10207 | 11584 | +      | 1395        | ATG   | T-   |           | 0          |
| trnH(cac)      | tRNA | 11585 | 11653 | +      | 69          |       |      |           | 0          |
| trnS1(agc)     | tRNA | 11654 | 11714 | +      | 61          |       |      |           | +1         |
| trnL1(cta)     | tRNA | 11716 | 11785 | +      | 70          |       |      |           | 0          |
| <b>nad5</b>    | PCG  | 11786 | 13606 | +      | 1821        | ATA   | TAA  |           | -27        |
| <b>nad6</b>    | PCG  | 13590 | 14117 | -      | 525         | ATG   | TAA  |           | 0          |
| trnE(gaa)      | tRNA | 14118 | 14186 | -      | 69          |       |      |           | +4         |
| <b>cob</b>     | PCG  | 14191 | 15330 | +      | 1140        | ATG   | AGA  |           | 0          |
| trnT(aca)      | tRNA | 15331 | 15402 | +      | 72          |       |      |           | -1         |
| trnP(cca)      | tRNA | 15402 | 15468 | -      | 67          |       |      |           |            |
| OH             |      | 15698 | 16107 | +      | 410         |       |      |           |            |
| Control Region |      | 15469 | 16387 |        | 919         |       |      |           |            |



## Assemblies

>SRR6109207 (circular) ReOrganized

ATACTATAAAATCCACCTCTCATTTTATTCACTTCATACATGCTATTACACACTCTGTGCCATC  
ATAGTATGTTTTCATACATCCTCCCTTCTTTACACCCTATGTATATCGTACATTAATGGTGTA  
CCCCCCTCCCCCTATGTATATCGTGCATTAATGGCGTGCCCCATGCATATAAGCATGTACAT  
ACTGTGCTTGGCTTTACATGAGGATACTCATTACAAGAACTTATTTCAAGCGATAGTCTATG  
AGCATGTATTTCACTTAGTCCAAGAGCTTGATCACCAAGCCTCGAGAAACCAGCAATCCTTG  
CGAGTACGTGTACCTCTTCTCGCTCCGGGCCCATAATTTGTGGGGGTTTCTATACTGAAACTA  
TACCTGGCATCTGGTTCTTACCTCAGGGCCATGTTAGCGTCAACTCAATCCTACTAACCCTTC  
AAATGGGACATCTCGATGGACTAATGACTAATCAGCCCATGATCACACATAACTGTGGTGTC  
ATGCATTTGGTATTTTTTAATTTTAGGGGGGGAACCTTGCTATGACTCAGCTATGACCGTAAAG  
GTCTCGTCGCAGTCAAATCAGCTGTAGCTGGGCTTATTCATCTTTTCGAGGCTCCTCATGGACA  
CCCATAAGGTGCAATTCAGTCAATGGTCACAGGACATAACACTATAGATCACCCGGACTGGC  
GTTACGTGTACGTACGTGTACGTACGTGTACGCACGTGTACGTACGTGTACGCACGTGTACG  
TACGTGTACGTACGTGTACGCACGTGTACGCACGTGTACGCACGTGTACGCACGTGTACGCA  
CGTGTACGTACGTGTACGCGTACGTATTTTAGATACTAAGTTAGCTTAGACAAACCCCCCTT  
ACCCCCCGTAACTTCAAGAAGCTTACATATACTTATGGATGTCCTGCCAAACCCCCAAAAACA  
AGACTAAATATATGCGCAAACATGAAGTCACTTACACCTAAACCCATATAATTAAGCTAACC  
CCCCAGCCAATGTTGCAACAACACTACGGACATGGGACTCTAAATTTTAATTTATCTATAGATA  
TTTTTCTTTTACTGTGTCTCCCCAGCATTGATTTTTTAATTATCATTATTCCACACCACCAATT  
TCCATTGAGCTATTTACATGAGTTCCAAATCAATTATGTTTCATGTAGCTTAACGAATAAAGC  
AAGGTACTGAAAATGCCTAGATGGGTCACGCTACCCCATAGACATAAAGGTTTGGTCCTAGC  
CTTCCTATTAGCCATTAACAAGATTACACATGTAAGTCTCCACGCTCCAGTGAAAATGCCCC  
TTAAGTCCTCTTAGACGACCTAAAGGAGCGGGTATCAAGCACACCTTATGGTAGCTCACAAC  
GCCTTGCTTAGCCACACCCCCACGGGAAACAGCAGTGATAAAAATTAAGCTATGAACGAAA  
GTTTCGACTAAGCTATGTTAATACTAGGGTTGGTAAATCTCGTGCCAGCCACCGCGGTCATAC  
GATTAACCTCGAGTTAATAGGCCTACGGCGTAAAGCGTGTAAGAAAGAAAAATCTCCTCTACTA  
AAGTTAAAGTATGATTAAGCTGTAAAAAGCTACCATTAATACTAAAATAAACTACGAAAGT  
GACTTTAAAATTTCTGATTACACGATAGCTAGGGCCCCAACTGGGATTAGATACCCCACTAT  
GCCTAGCTCTAAACATAGATATTTTACTAAACAAAACCTATTCGCCAGAGAACTACTAGCAAC  
AGCTTAAAACTCAAAGGACTTGGCGGTGCTTTATATCCCCCTAGAGGAGCCTGTTCTGTAAT  
CGATAAACCCCGATAGACCTCACCATCCCTTGCTAATTCAGTTTATATACCGCCATCTTCAGC  
AAACCCTTAAAGGAAAAAAAGTAAGCATAACTACCCTACATAAAAAAGTTAGGTCAAGGT  
GTAACCTATGGGCTGGGAAGAAATGGGCTACATTTTCTATTCAAGAACAACCTTCTACGAAAA  
CTTTTATGAAACTAAAAGCTAAAGGCGGATTTAGTAGTAAATTAAGAATAGAGAGCTTAATT  
GAACAGGGCAATGAAGCACGCACACACCGCCCGTCACCCTCCTCGAGTGATATAATTTAATT  
ATAACCTATTTAAACTAAGCAAAGCATAAGAGGAGACAAGTCGTAACAAGGTAAGCATACT  
GGAAAGTGTGCTTGGATGAGCCAAAGTGTAAGCTTAAACAAAGCGTCTGGCTTACATCCAGA  
AGATTTTCATTAATATATGACTACTTTGAACCCAAAGCTAGCCCAAGCAACAATGACTAGTAA  
AACCATTATGAAACATTCAAACAAAACATTTAGTAGCATGACTAGAGTATAGGAGATAGAA  
ATTTTTAACTGGAGCTATAGAGAGAGTACCGCAAGGGAATGATGAAAGATTACCTAAAGTG  
ATAAACAGCAAAGATTGCCCCTTCTACCTTTTGTATAATGAGTTAGCTAGAAATAACTTAAC  
AAAGAGAACTTAAGCTAAGTCCCCGAAACCAGACGAGCTACCTATGAACAATCCACTGGG  
ATGAACTCATCTATGTTGCAAAATAGTGAGAAGATCCATAGGTAGAGGTGAAAGGCCTAAC  
GAGCCTGGTGATAGCTGGTTGCCGAGAATAGAATTTTAGTTCGACTTTAAACCTGCCTACAA  
AACTAATAATTCTAATGCAGATTTAAAATATATTCTAAAAAGGTACAGCTTTTTAGAGTTAA  
GGATACAGCCTTACTTAGAGAGTAAATATTTATATAAGCCATAGTAGGCCTAGAGGCAGCCA  
TCAATTAAGAAAGCGTTAAAGCTCAACATCTCTATTAACCTAATAACCAAGAATATTTAATCA  
ACTCCTAATGTATTACTGGGTCAATCTATTTAAATATAGAAGTGATAATGCTAATATGAGTA

ACAAGAAATATTTCTCCCATGCATAAGCTTATAACAGCAACGGATAACCACTGATAGTTAAC  
AACAACATAGAAATAACCTAATGATAAAACACCTATTAAATCAATTGTTAGTCCAACACAG  
GCATGCAATCAGGGAAAGATTAAAAGAAGTGAAAGGAACTCGGCAAATACAAACCCCGCCT  
GTTTACCAAAAACATCACCTCCAGCATTTCAGTATTGGAGGCACTGCCTGCCCCGGTGACAT  
CAGTTAAACGGCCGCGGTATTCTGACCGTGCAAAGGTAGCATAATCATTGTCTCTAAATA  
AGGACTTGTATGAATGGCCACACGAGGGTTTAACTGTCTCTTACTTCCAATCAGTGAAATTG  
ACCTCCCCGTGAAGAGGGCGGGGATAAGACAATAAGACGAGAAGACCCTATGGAGCTTTAAT  
TAACTAATTCAAAAAGAACTACTAACGACCCAACAGGAATAATATATCTCTTTTATGAATT  
AGCAATTTAGGTTGGGGCGACCTCGGAGGACAAAATAGCCTCCGAGTGATTATAAATCTAG  
ACTTACCAGTCAAAATGCTTAATCACTTATTGATCCAAAATTCCTTTGATCAACGGAACAA  
GTTACCCTAGGGATAACAGCGCAATCCTATCCGAGAGTCCATATCGACAATAGGGTTTACGA  
CCTCGATGTTGGATCAGGACATCCTAATGGTGCAGCAGCTATTAAAGGTTTCGTTTGTTCAC  
GATTAAAGTCTTACGTGATCTGAGTTCAGACCGGAGCAATCCAGGTCGGTTTCTATCTATTC  
AAATAATTTCTCCAGTACGAAAGGACAAGAGAAATAAGGCCTACTTCTCTGAAGCGCCTTA  
AGACCAATAGATGAATTTATCTAAATCTAGTAAATCTAACTCCAATATTGCCCAAGAGACAG  
GGCTTTGTTAGGGTGGCAGAGCCCGTAATTGTGCAAACTTAACTCTTGTGTCCAGAGGT  
TCAATTCCTCTCCCTAGCATATGTTTATAATTAACATCTTCTCACTAATTGTACCTATTCTTCT  
TGCTGTAGCCTTTCTGACTCTAGTAGAACGAAAAGTACTAGGCTACATACAGCTTCGAAAAG  
GCCCAAATATTGTAGGTCCATATGGTCTCCTACAACCAATCGCAGATGCCGTAAAACCTCTTT  
ACTAAAGAACCTTTACGACCCTTACGTCAATCCATAACTATATTTATTATAGCCCCTATTCTA  
GCCTTAACACTAGCTCTGACCATGTGAGTCCCCTTACCAATACCGCACCCCCTTATTAACATA  
AACCTAGGAGTACTATTCATACTAGCTATATCAAGTCTAGCTGTATACTCTATTCTCTGATCT  
GGATGAGCCTCAAACCTCAAATATGCCCTAATTGGAGCCCTACGAGCCGTAGCTCAAACGAT  
CTCATATGAAGTCACACTAGCCATTATCCTTTTATCCGTTCTACTAATAAATGGCTCATTTAC  
GCTATCCACGCTAATCATTACCCAAGAACATCTTTGATTAATCTTCCCTGCATGACCACTAGC  
TATAATATGATTTATTTCTACCCTAGCAGAAACAAATCGAGCCCCCTTTGACCTAACAGAAG  
GAGAATCAGAACTAGTCTCTGGGTTTAAATGTGCAATATGCAGCAGGTCCATTTCGCCCTGTT  
TTCTAGCAGAATATGCCAACATCATCATAATAAATGCTCTTACAACCTATTCTATTCTTCGGA  
GCATTTACAGCCCCTACATACCAGAATTATACATTGTTAATTTTACCGTAAAACTTTACTC  
CTCACAATCTCTTTTCTATGAATCCGAGCATCATATCCTCGATTCCGATACGACCAACTAATA  
CACCTACTATGAAAAAATTTCTACCTCTCACACTAGCTCTATGTATATGACATGTAACCTCTA  
CCTATTATTACAGCAAGCATTCCACCTCAAACGTAAGAAATATGTCTGACAAAAGAATTACT  
TTGATAGAGTAAGCCATAGGGGTTTAAAGTCCCCTTATTTCTAGAATCATAGGAATCGAACCT  
AATCTTAAGAACTCAAAAATCTTCGTGCTACCTAACTACACCATATCCTAAAGTAAGGTCAG  
CTAAATAAGCTATCGGGCCCATAACCCGAAAATGTTGGTTTATCCCCTTCCCATACTAATAA  
AACCAGCCATCCTTATTACCATTACATCCACCGTTGTCTTAGGAACATAAATTGTTCTATTTA  
GCTCCCCTGATTACATAATCTGAGTTGGCTTTGAAATAAATATACTAGCCATTATCCCAATTC  
TAATAAAAAAATATAACCCACGAGCCATAGAAGCTTCCACAAAATATTTTCTAACACAAGCT  
ACAGCATCCATGCTTCTAATGCTAAGCATCATCAATCTACTATGCTCAGGACACTGGAC  
AGTTTCAACAATTCCCAATCCAGTAGCATCTACCATAATTACTATTGCTCTAACAATAAACT  
TGGCCTATCACCATTTCACTTTTGAGTCCCAGAAGTTACACAAGGCATTTCCCTTATCTTCAGG  
AATAATCCTATTAACATGACAAAAAATTGCACCTTTATCCATTCTATACCAAATTTACCATC  
CGTTAACTCAAATCTCTTACTAATAATAGCTATCACATCCATACTGGTAGGAGGCTGAGGAG  
GATTAAATCAAACCAACTCCGAAAAATCTTGGCATACTCCTCAATTACCCATATAGGCTGA  
ATGGCTGCTATTATAGTATATAATCCTACCCTAGCAATTCTTAACCTAACAATTTACATCATA  
ATAACTCTAGGAACATTTATACTATTACATACATAGCTCATCTACAACAACACTATCACTATCT  
TATACATGAAATAAATTCCCATTAAATAGCCCCACTAATCTTAATACTTATACTATCACTAGGA  
GGCCTCCCTCCTCTCTCAGGCTTTATCCCCAAATGAATAATTATTCAAGAATTAACAAAAAA  
CGACATAATTATTATACCTACACTTATAGCCATTACAGCCCTACTAAACCTATATTTTACAC  
ACGCCTAACATATACTACAGCACTAACTATATTTCCCGCAACAAATAATATAAAAAATAAAT  
GACAATTCGAAACCACAAAAAAGACAACCTCTCCTAGCCCCTCTAATCGTGACATCAACTATA

CTACTACCACTAACCCCAATACTAGCAGCTCTTGATTAGAGATTTAGGCTAAACAGACCAAG  
GGCCTTCAAAGCCTCAAGTAAGTGAAAATCCACTTAATCTCTGCAATATTTAAGGACTGCAA  
GAATCTACCTCACATCAACTGAACGCAAAACAATCGCTTTAATTAAGCTAAGCCCTTCTAGA  
TCGGTGGGCTTTTACCCACAAAACCTTTAGTTAACAGCTAAAAACCCTAGACAACCTGGCTTC  
AATCTACTTCTCCCGCCGCGTAGGAAAAAAGGCGGGAGAAGCCCCGGCAGAATTGAAGCT  
GCTTCTTTGAATTTGCAATTCAATATGATTACTCACCACAGAGCCTGGTAAAAAGAGGACTT  
AACCCCCATTCTTAGATTTACAGTCTAGTGCTTTTATCAGCCATTTTACCTATGTTCAATTAACC  
GATGACTGTTTTCCACCAACCACAAAGATATTGGCACTCTTTATCTTCTGTTTGGCGCATGAG  
CTGGTATAACGGGCACTGCTCTTAGCCTTCTAATCCGTGCTGAATTAGGTCAGCCTGGAGCT  
CTGTTAGGAGATGACCAAATTTACAATGTAGTTGTAAGTCCACGCATTCGTAATAATCTT  
CTTTATAGTTATGCCTATTATGATCGGAGGCTTTGGAAATTGACTAGTACCTTTGATAATTGG  
TGCGCCTGATATAGCATTTCGCCGAATAACAATATGAGTTTCTGATTACTACCTCCATCCTT  
TCTTCTCCTTCTGGCTTCTTCATAGTAGAAGCAGGCGCAGGGACTGGATGAAGTGTATACC  
CTCCTCTAGCAGGTAAGTCTAGCCCATGCAGGAGCATCAGTAGACCTAACAACTTTTTCTCTA  
CATCTGGCAGGGGTTTCTTCTATTTTAGGGGCTATTAAGTCTTATTACCACTATCATCAACATG  
AAACCCCTGCAATATCTCAATATCAAACCTCCCTATTCGTGTGATCAGTACTTATCACAGCA  
GTACTTCTCCTTCTATCTTTACCAGTCTTAGCAGCTGGAATTACTATACTACTTACAGATCGA  
AATCTCAATACTACTTTCTTCGACCCGGCCGGAGGAGGGGATCCCATTCTATATCAACATCT  
ATTTTGATTCTTTGGCCATCCTGAAGTCTATATTCTAATCCTCCCTGGGTTTGAATAATTTCA  
CACATTGTCACATACTATTAGGAAAGAAAGAGCCCTTTGGTTATATGGGAATAGTGTGGGC  
AATAATGTCAATTGGATTCTTAGGATTTATTGTATGGGCCCATCATATATTTACTGTAGGCAT  
AGATGTTGATACACGAGCCTATTTTACCTCGGCCACTATAATTATTGCAATCCCGACAGGAG  
TTAAAGTATTAGCTGACTAGCTACCTGCATGGAGGAAATATTAAGTGATCCCCTGCCATA  
ATGTGAGCCCTAGGTTTCATTTTTCTATTTACAGTAGGGGGTCTTACAGGCATTGTTCTAGCT  
AACTCATCTCTGGACATTGTCCTCCATGACACATACTACGTAGTAGCACACTTCCACTATGTA  
CTATCAATAGGGGCCGTGTTTCGCTATTATAGGAGGCTTCGTCCATTGATTCCCATTTTCG  
GGCTATACACTTAATAATACATGAGCAAAAATTCACCTTCGTAATTATATTTGTTGGAGTCAA  
TATAACATTCTTCCCCCAGCACTTCCTAGGTCTATCAGGTATGCCTCGACGATATTCTGATTA  
TCCAGACGCCTATACAGCATGAAACACAGTGTCTTCAATGGGTTTCATTCAATTTCACTAACAG  
CAGTTATGTTAATAATTTTCATAATTTGAGAAGCCTTCGCATCTAAACGAGAAGTGGCAGTG  
ATTGAGCTTACTACAATAATATTGAATGGCTCCACGGATGTCTCCTCCCCCATAACCATACTTC  
GAAGAGCCCCGCCACGTCATACTGAAATAAGAAAGGAAGGAATCGAACCCCTAGAAATTGG  
TTTCAAGCCAGCATCATAACCACTATGTCTCTCTCAATAAAGAGGTATTAGTAAAAATTACA  
TAACTTTGTCAAAGTTGAATTATAGGTGAAAATCCTTTATATCTCTATGGCGCATCCCTTTCA  
AACAGGCCTTCAAGATGCAACTTCCCCCATCATGGAAGAACTCCTACACTTCCATGATCATA  
CACTAATAATTGTATTCTTAATTAGTTCCCTAGTTCTCTATATCATTTCATTATATTAAGTAC  
TAAATTAACACATACAAATACAATAGACGCACAAGAAGTGGAGACAGTATGAACTATTCTA  
CCAGCTATCATCTTAATTATAATTGCACTTCCATCACTACGAATTCTTTATATGATAGATGAA  
ATTAATAACCCATCATTAAGTAAAGACTATGGGGCATCAATGATACTGAAGCTATGAGTA  
TACAGATTATGAAGACTTGAGCTTCGATTCTTATATAACCCCAACACAAGAATTAAAGCCCC  
GAGAGCTGCGATTACTAGAGGTAGATAATCGAGTAGTACTACCCATAGAAATAACAATTCG  
CATATTAATTTCCCTCAGAAGATGTGCTACATTCGTGAGCTGTCCCATCTCTAGGACTAAAAA  
CTGATGCAATCCCGGGGCGATTAAATCAAACAACCTCTTATGGCCATGCGACCAGGACTATAT  
TATGGCCAATGCTCAGAGATTTGCGGTTCTAATCATAGCTTTATACCCATTGTACTTGAAATA  
GTTCCGCTGTCTTACTTTGAAAAATGATCCGCTTCAATACTATAAAATCATTAAAGAGCTTTA  
TAGCGTTAACCTTTTAAGTTAAAGACTGAGAGTGCAAGTCTCTCCTTAATGGAAATGCCACA  
ATTAGACACATCCACATGATTTATTACAATCCTATCCATGATCTTAACACTATTTATTATATT  
TCAGTTAAAAGTCTCAAAACACAACCTATCCTGAGTTTCCTGAATTAATAAAACAACCCCACTAT  
CAAAAAAACCTATGCCTTGAGAAGAAAAATGAACGAAAATCTGTTTCGCCTCTTTTACTACCC  
CAATGATAATAGGAGTACCAATTGTGGTTCTGATTATTATTTCCCAAGTATCTTATTTCCCT  
CACCTAATCGATTAATCAATAATCGCCTAGCTACTGTCCAACAATGATTAATTCAATTAGTAT

CTAAGCATATACTGTCTATTACACAATTATAAAGGACAAACCTGAGCGCTAATACTAATGTCA  
TTAATTTTATTATTGGCTCAACTAACCTTTTAGGCCTATTACCACATTCATTACACCTACTA  
CACAACCTATCAATAAATTTAGGAATGGCCATTCTCTGTGAGCAGGTACAGTAGTTATAGGA  
TTTCGACACAAAACCTAAGGCATCTCTGGCCCACTTTCTACCCCAAGGAACACCTCTTCCTCTG  
ATCCCAATGTTAGTAATTATCGAGACAATTAGTCTGTTTATTCAACCTGTGGCCCTAGCTGTA  
CGACTGACCGCTAATATTACTGCAGGCCATCTACTTATTCAATTAATCGGAGGGGCTACCCT  
AGTTTTAATAAACATTAACCCTGTAAACAGCCCTAATTACCTTTATTATTCTTATTCTACTTACT  
ATTCTCGAATTAGCTGTAGCTCTTATCCAAGCCTATGTTTTCACCTACTAGTTAGTCTATAC  
TTACATGATAATACCTAATGATCCACCAAACACATGCATATCATATAGTTAACCCAAGCCCA  
TGGCCACTTACAGGAGCTCTCTCGGCTCTTCTTATAACATCAGGACTAATTATATGATTTTAC  
TTAACTCGGTATACTTACTAATACTAGGCCTCACCACCAACATACTTACCATGTACCAATGA  
TGACGAGATATCGTCCGGGAAAGTACCTTCCAAGGCCATCACACCCCAATCGTCCAAAAAG  
GACTACGATATGGAATAGTCTTATTTATTGTATCAGAAGTATTTTTCTTCGCGGGATTCTTTT  
GGGCCTTCTACCACTCAAGCCTAGCACCTACTCCTGAATTAGGAGCATGTTGACCACCTACA  
GGTATCATCCCCCTTAAATCCGCTAGAAGTTCCACTACTTAACACCTCTGTACTTCTAGCATCT  
GGGGTATCTATCACTTGAGCTCATCATAGTCTAATAGAAGGAGACCGCAAACATATGCTCCA  
AGCCCTATTTATTACTATTTCACTAGGAGTTTATTTTACACTTCTACAAGCCTCAGAATACTA  
TGAGACATCCTTTACTATTTCAAGATGGAGTGTATGGTTCAACCTTCTTTATAGCAACTGGATT  
TCATGGGCTTCATGTAATTATTGGTTCAACTTTTCTTACTGTGTGTTTTCTACGACAACTGCAC  
TTTCACTTTACATCCAACCATCACTTTGGCTTTGAAGCGGCAGCATGATACTGACACTTCGTA  
GACGTTGTATGGCTTTTCTTTATGTTTCTATTTACTGATGAGGATCCTACTTCTTTAGTATTA  
ACTAGTACGATTGACCTCCAATCAATAGGCTCTGGTACAAGCCAGAAAGAAGTAATAAACC  
TAATTCTAGCACTTCTAACCAACGTATTATTAGCCTCTCTGCTCGTTCTTATTGCATTCTGACT  
GCCACAACATAAATATCTATGCAGAAAAAGTAAGTCCTTATGAATGTGGATTGATCCTATAG  
GATCAGCACGCCTTCTTTCTCTATAAAATTTTTTCTAGTAGCTATTACATTCCTTTTATTCTGA  
CTTAGAAATTGCTCTACTCCTCCCGCTTCTTGAGCATTACAGACTAACAACCTTAATAACTAT  
ACTTATTATAGCTCTATTACTCATTTCCTTATTAGCCGCAAGCCTAGCTTATGAGTGAACCGA  
AAAAGGGCTAGAATGGGCGGAATATGATAATTAGTTTAAACTAAAATAAGTGATTTTCGACTC  
ACTAGATTATGACTAACATCATAATTATCAAATGTCTGTGGTCTATATTAATCTCTTTCTAGC  
CTTTACTATATCCTTAATAGGGCTACTCATCTATCGATCCCATTTAATATCCTCCCTATTATGC  
TTAGAAGGCATGATGCTGTCACTATTTGTTATACTAGCAGTAACAATCCTAAGTAACCACTT  
CACACTAGCCAGTATGACTCCAATCATTCTATTAGTATTGCTGCCTGTGAAGCAGCGTTGG  
GGCTTTCTCTGCTAGTAATAGTCTCTAATACCTATGGAACCTGACTACGTACAAAATCTTAACC  
TCCTACAATGCTAAAAATTATCCTCCCTACCATAATACTAGTACCCCTTACATGAATATCAAA  
GCCTAACATAATCTGAATTAATAACAACCTATAGTCTACTCATCAGCCTTATTAGTCTGAC  
ATATCTCAATCAACTCAGTGATAATAGTCTAAACTTCTCATTAAACATTCTTTACCGACTCCCT  
ATCAGCCCCCTGTAGTTCTCACAAACATGACTACTGCCCTTAATACTTATAGCTAGTCAATT  
TCACCTGTCAAAAGAGACCCTGACCCGGAAAAAATTATATATCACAATACTAATTCTCCTGC  
AACTATTCTTAATTATAACATTTTCTGCTACTGAGTTAATCATATTCTATATTTTATTGAAGC  
TACCCTGGTACCGACTTTAGTTATCATTACTCGATGAGGAAACCAAACAGAACGACTAAACG  
CGGGCCTCTATTTTTTATTCTACACCTTAGTAGGATCCTTGCCCTTACTAGTTGCACTGTTATA  
TGCCCAAAACAGCTTAGGATCACTAAATTTTCTCATAGTACAGTACTGAACTCAGCCCTTGC  
CAAATTCCTGATCTAACATTTTTCATGTGGCTGGCATGTATAATAGCATTTCATAGTAAAAATA  
CCGCTATATGGCTTACACCTATGACTACCTAAAGCACATGTAGAAGCTCCTATTGCAGGATC  
CATAGTACTTGCTGCAGTACTTCTAAACTAGGGGGATACGGTATAATGCGGATTACAACAA  
TACTCAACCCTCTAACAAATTTTATAGCCTACCCCTTCATAATGCTCTCACTATGAGGAATAA  
TCATAACAAGTTCTATTTGTTTACGCCAGACAGACCTAAAGTCCCTAATTGCATACTCCTCTG  
TTAGTCACATAGCCCTAGTCATTGTAGCAATTCTAATCCAATCCCCATGAAGCTACATAGGA  
GCTACTGCTCTAATAATCGCCCATGGGTAAACATCTTCTATGCTATTCTGTCTTGCAAACCTCT  
AACTACGAGCGAACCCATAGCCGAACCTATAATTCTCGCACGGGGCTTGCAAACGCTTCTTCC  
ACTTATAGCAGCTTGATGACTATTAGCAGGCCTAACTAACTTAGCTCTTCTCCTACAATTAA

TCTGATTGGGGAAGTGTGTTGTAGTGATAGCCACATTTTCATGATCCAATATTACCATTCTCTT  
AATAGGAGTTAACATTACCATTACTGCTCTCTACTCTCTATATATACTAATTTCTACACAGCG  
AGGCAAGTATACAGACCACATCAAAAATATTAAGCCATCTTATACACGAGAAAATGCCTTA  
ATAGCCTTACATTTACTACCCCTTTTACTTCTATCTCTTAACCCTAAAGTAGTTCTAGGCTTTA  
TTTACTGTAAATATAGTTTAAACAAAACATTAGATTGTGAATCTAGTAATAAAAAGCTTAAAT  
CTTTTTATTTACCGAAAAAGCATGCAAGAACTGCTAATTCATGCACCCATGCATAAAATCAT  
GGCTTTTTCAACTTTTAGGGGATAGAAGTAATCCATTGGTCTTAGGAGCCAAAAAATTGGTG  
CAACTCCAAATAAAAAGTAATTAACCTACTTACCTCCTTCACCATTACAACCCTATTTATATTA  
ATCATGCCCATTATCCTAACCTGTACCCCAGCATATGAAAATAAACTTTACCCGCAATATGT  
AAAAACCACAGTCTCTTATGCCTTCACAATTAGCATAATTCCCATAGTAATATTCATCCACTC  
CGGACAAGAAGCAATCATCTCAAACCTGACACTGAATAACCATCCAAACCCTAAAACCTCAGT  
CTAAGCTTCAAATTAGATTACTTTTCAATAATCTTCGTACCAGTGGCCCTATTCGTCACATGG  
TCAATTATAGAATTCTCTATATGATATATACACGCAGATCCTAACATTAACCGATTCTTTAAA  
TATCTACTTATATTCTCGTCACGATAATAATTCTAGTAACCGCAAATAATCTATTTTCAGCTA  
TTTATCGGCTGAGAGGGAGTAGGAATCATATCATTCTCCTCATTGGATGATGATATGGACG  
AACAGATGCTAATACGGCTGCCCTACAAGCAGTACTATACAACCGCATTGGAGATGTTGGTT  
TTATCATGGCCATAGCTTGATTCTTACTCAATACAAATGCATGGGACTTCCAACAAATCTTTA  
TAATCGAGCATAAAAACCTCAATATTCCACTGGCAGGACTACTTCTAGCAGCTACCGGAAAG  
TCTGCCCAATTTGGACTTCACCCATGACTCCCATCAGCCATAGAAGGCCCCACTCCTGTCTCA  
GCACTACTTCACTCTAGCACAATAGTAGTAGCAGGCGTATTTCTTCTAGTCCGATTTACCCC  
TTAATAGAACATAACAAGACAATTCAAACGGTTACCCTATGCTTAGGGGCAATAACAACCTT  
GTTTACAGCAATCTGCGCCCTTACCCAAAATGATATCAAAAAAATTATTGCCTTCTCCACCTC  
GAGCCAACTAGGACTAATAATTGTAACAATTGGTATTAATCAGCCTCATCTGGCCTTTCTCC  
ATATCTGCACGCACGCATTCTTCAAGGCCATGCTATTTCTATGCTCCGGATCTATTATTCATA  
GTCTAAACAACGAACAAGATATTCGAAAGATAGGAGGGCTATTTAAAAGTCTACCATTTACC  
ACTACTGCTCTAATCATCGGAACTCTAGCACTTACAGGAATGCCCTTCTTAACAGGATTTTAC  
TCCAAAGACTTAATTATTGAAACCGCCAATACGTCATACACCAACGCCTGAGCCTTACTAAC  
AACCCTTATCGCCACATCCATAACTGCCGCCTACAGTACTCGAATTGTATTTTTTACACTTCT  
AGGACAACCTCGCTATAGTCCCATTATCACCATTAACGAGAATAACCAGTTCTCTGACTAACT  
CTGTCAAACGATTGCTACTAGGAAGTATCTTTGCGGGATTCTTAATCTCTCATAACATTACAC  
CCACCACTGTCCACAAAATAACCATGCCCTGTACCTAAAAATGATAGCCCTTACAGTAACA  
ATCCTAGGCTTTATTCTAGCACTAGAACTTAACCTAGCCATACAAAATCTCAAATTTGACTAC  
CCTTTAAGCACGTTCAAATTTTCAAATCAACTAGGATATTTCCCTACTACTCTGCATCGTCTC  
GCACCAATAATAGGTCTATCAATAAGCCAAAAACAGCATCCATACTGCTAGATGCAATCTG  
ACTAGAGAATGTTCTACCAAAGTCCATCTCCTACTTTCAAATAAAAATCCTCAATCACAGTCTC  
CAACCAAAAAGGGACTAATTAACCTATACTTTCTCTCCTTTATAATTACACTAATCTTAAGTCT  
CTTTATACTTAATTTCCACGAGTGACTTCCATAATTACCAATACACCAATAAGGAGAGATCA  
TCCAGTAACAATAACTAATCAAGTACCATAACTATATAAAGCTGCAATTCCCATAGCCTCTT  
CACTAAAAAATCCTGAATCCCCGTGTGCATAAATCACCCAATCTCCTATTCCATTAACTTAA  
ATACTACCTCGGCTTCATCATCCTTTAAAATATAACAAACAGCCAGTAACTCAGACAACAGA  
CCTACAATAAATGCACCTAGTACAGCCTTATTAGAAAGTCAAACCTCAGGATATTGCTCAGT  
GGCTATGGCCGTAGTGTACCCGAACACTACAAGTATACCCCCTAAATAAATTA AAAAGACC  
ATTA AACCCAAAAAAGATCCTCCAAAGCTTAACACAATACCACACCCTACACCCCCACTAAC  
AATCAAGACTAAACCTCCGTAGATAGGAGAGGGCTTAGAAGAAAACCCCGCAAACTAACT  
ACAAAAACGATACTTAAAATAGATACAATGTATGTTATCATCATTCTTACATGGAATCTAAC  
CATGACCAATGACATGAAAAATCATCGTTGTATTTCAACTATAAGAACCCCAATGATCAACA  
TCCGAAAAAATCATCCATTAGTTAAAATTATCAACAACCTCATTCAATTGACCTTCCAACACCAT  
CAAACATTTCAACATGATGGAACCTTTGGGTCCCTGTTAGGAGTGTGTCTGATCTTGCAAATCT  
TAACAGGCTTATTTCTAGCCATACACTATACATCAGATACAGCTACAGCCTTTTCATCAGTCG  
CACACATTTGTGAGACGTCAACTATGGTTGATTTATCCGATATATACATGCCAATGGGGCC  
TCTATATTTTTTATCTGCCTATTTATACACGTAGGGCGAGGCTTATACTATGGATCATACCTA

TTTCCAGAGACATGGAATATCGGAATTATTCTCCTACTTACAGTTATAGCCACAGCATTTCATA  
GGGTATGTACTACCTTGAGGACAAATATCCTTCTGAGGAGCAACCGTCATTACTAACCTACT  
ATCAGCAATTCCCTTACATTGGCACTAATCTAGTGGAGTGAGTCTGAGGGGGTTTCTCCGTAG  
ATAAAGCAACACTAACCCGATTTTTTGGCTTTTCACTTTATCCTTCCATTTATCATCTCAGCACT  
AGCAATAGTCCATCTATTATTCCTTCACGAAACAGGATCTAATAACCCCTCCGGAATTCCAT  
CTGACCCAGACAAAATCCCATTTTACCCCTATCATAACAATTAAAGACATCCTAGGCGTCCTA  
TTTCTTGTCTCGCCTTAATAACCCCTGGCTTTATTCTCACCAGACCTGTTAGGAGACCCTGAT  
AACTATACCCCTGCAAATCCACTAAGTACCCCGCCACATATTAAGCCTGAATGGTACTTTCT  
ATTTGCCTACGCTATCCTGCGATCTATTCTTAATAAACTAGGAGGGGTGCTAGCTCTAATCTT  
CTCTATTCTAATTCTAACTATTATTCCACTATTACATACATCCAAACAACGAAGCATGATATT  
CCGACCTCTAAGTCAATGCTTATTCTGACTCCTAGTAGCAGACCTACTCACACTAACATGAA  
TTGGAGGACAGCCAGTAGAACACCCCTTCATTATTATTGGGCAATTGGCCTCTATTCTCTACT  
TTACAATTCTTCTAGTACTTATACCTATCACTAGCATTATTGAGAATAGCCTCTCAAAATGAA  
GAGTCTTTGTAGTATATTAATTACTTTGGTCTTGTAACCAAAAACGGAGATTCTCTACTTC  
TCCCTAAGACTCAAGGAAGGAGCAACAACCCCACTACCAGCACCCAAAGCTGGTGTCTACT  
TAAACTATCCCCTG

>SRR6109208 (circular) ReOrganized

ATACTATAAATCCACCTCTCATTTTATTCACTTCATACATGTTATTACACACTCTGTGCCATC  
ATAGTATGTTTTCATACATCCTCCCTTCTTTCACACCCTATGTATATCGTACATTAATGGTGTA  
CCCCCCTCCCCCTATGTATATCGTGCATTAATGGCGTGCCCCATGCATATAAGCATGTACA  
TACTGTGCTTGGCTTTACATGAGGATACTCATTACAAGAACTTATTTCAAGCGATAGTCTATG  
AGCATGTATTTCACTTAGTCCAAGAGCTTGATCACCAGCCTCGAGAAACCAGCAATCCTTG  
CGAGTACGTGTACCTCTTCTCGCTCCGGGCCCATAATTTGTGGGGGTTTCTATACTGAACTA  
TACCTGGCATCTGGTTCTTACCTCAGGGCCATGTTAGCGTCAACTCAATCCTACTAACCCCTC  
AAATGGGACATCTCGATGGACTAATGACTAATCAGCCCATGATCACACATAACTGTGGGTGC  
ATGCATTTGGTATTTTTTAATTTTAGGGGGGGAACCTTGCTATGACTCAGCTATGACCGTAAAG  
GTCTCGTCGCAGTCAAATCAGCTGTAGCTGGGCTTATTCATCTTTCGAGGCTCCTCATAGACA  
CCCATAAGGTGCAATTCAGTCAATGGTCACAGGACATAACACTATAGATCACCCGGACTGGC  
GTTACGTGTACGCACGTGTACGCACGTGTACGTACGTGTACGCACGTGTACGTACGTGTACG  
CACGTGTACGTACGTGTACGCACGTGTACGTACGTGTACGCACGTGTACGTACGTGTACGCA  
CGTGTACGCACGTGTACGCACGTGTACGTACGTGTACGCACGTGTACGTACGTGTACGCATG  
TGTACGTACGTGTACGCACGTGTACGTACGTGTACGTACGTGTACGCACGTGTACGTACGTG  
TACGCACGTGTACGCACGTGTACGTACGTGTACGCACGTGTACGCACGTGTACGCACGTGTA  
CGCGTACGTATTTTAGATACTAAGTTAGCTTAGACAAACCCCCCTTACCCCCGTAACCTCAA  
GAAGCTTACATATACTTATGGATGTCTGCCAAACCCCAAAAACAAGACTAAATATATGCGC  
AAACATGAAGTCACTTACACCTAAACCCATATAATTAAGCTAACCCCCCAGCCAATGTTGCA  
ACAACACGGACATGGGACTCTAAATTTTAATTTATCTATAGATATTTTTCTTTTACTGTGTC  
TCCCCAGCATTGATTTTTTAACCTATCATTATCCACACCACCAATTTCCATTGAGCTATTTAC  
ATGAGTTCCAAATCAATTATGTTTCATGTAGCTTAACGAATAAAGCAAGGTACTGAAAATGCC  
TAGATGGGTACGCTACCCCATAGACATAAAGGTTTGGTCCTAGCCTTCCTATTAGCCATTA  
ACAAGATTACACATGTAAGTCTCCACGCTCCAGTGAAAATGCCCCTTAAGTCCTCTTAGACG  
ACCTAAAGGAGCGGGTATCAAGCACACCTTATGGTAGCTCACAACGCCTTGCTTAGCCACAC  
CCCCACGGGAAACAGCAGTGATAAAAATTAAGCTATGAACGAAAGTTCGACTAAGCTATGT  
TAATACTAGGGTTGGTAAATCTCGTGCCAGCCACCGCGGTCATACGATTAACCTCGAGTTAAT  
AGGCCTACGGCGTAAAGCGTGTAAAAGAAAAAATCTCCTCTACTAAAGTTAAAGTATGATT  
AAGCTGTAAAAGCTACCATTAATACTAAAATAAACTACGAAAGTGACTTTAAAATTTCTGA  
TTACACGATAGCTAGGGCCCCAACTGGGATTAGATACCCCACTATGCCTAGCTCTAAACATA  
GATATTTTACTAAACAAAACCTATTTCGCCAGAGAACTACTAGCAACAGCTTAAAACCTCAAAGG  
ACTTGGCGGTGCTTTATATCCCCCTAGAGGAGCCTGTTCTGTAATCGATAAACCCCGATAGA  
CCTCACCATCCCTTGCTAATTCAGTTTATATACCGCCATCTTCAGCAAACCCCTTAAAAGGAAA  
AAAAGTAAGCATAACTACCCTACATAAAAAAAGTTAGGTCAAGGTGTAACCTATGGGCTGGG

AAGAAATGGGCTACATTTTCTATTCAAGAACAACCTTCTACGAAAACCTTTTATGAAACTAAAA  
GCTAAAGGCGGATTTAGTAGTAAATTAAGAATAGAGAGCTTAATTGAACAGGGCAATGAAG  
CACGCACACACCGCCCGTCACCCTCCTCGAGTGATATAATTTAATTATAACCTATTTAAACTA  
AGCAAAGCATAAGAGGAGACAAGTCGTAACAAGGTAAGCATACTGGAAAGTGTGCTTGGAT  
GAGCCAAAGTGTAGCTTAAACAAAGCGTCTGGCTTACATCCAGAAGATTTTCATTAATATATG  
ACTACTTTGAACCCAAAGCTAGCCCAAGCAACAATGACTAGTAAAACCATTATGAAACATT  
AAACAAAACATTTAGTAGCATGACTAGAGTATAGGAGATAGAAATTTTTAACTGGAGCTAT  
AGAGAGAGTACCGCAAGGGAATGATGAAAGATTACCTAAAGTGATAAACAGCAAAGATTG  
CCCTTCTACCTTTTGTATAATGAGTTAGCTAGAAATAACTTAACAAAGAGAACTTAAGCTAA  
GTCCCCCGAAACCAGACGAGCTACCTATGAACAATCCACTGGGATGAACTCATCTATGTTGC  
AAAATAGTGAGAAGATCCATAGGTAGAGGTGAAAGGCCTAACGAGCCTGGTGATAGCTGGT  
TGCCCAGAATAGAATTTTAGTTCGACTTTAAACCTGCCTACAAAATAATAATTCTAATGCA  
GATTTAAAAATATATTCTAAAAAGGTACAGCTTTTATAGAGTTAAGGATACAGCCTTACTTAGA  
GAGTAAATATTTATATAAGCCATAGTAGGCCTAGAGGCAGCCATCAATTAAGAAAGCGTTA  
AAGCTCAACATCTCTATTAACCTTAATACCAAGAATATTTAATCAACTCCTAATGTATTACTG  
GTCAATCTATTTAAATATAGAAGTGATAATGCTAATATGAGTAACAAGAAATATTTCTCCCA  
TGCATAAGCTTATAACAGCAACGGATAACCACTGATAGTTAACAACAACATAGAAATAACC  
TAATGATAAAACACCTATTAATCAATTGTTAGTCCAACACAGGCATGCAATCAGGGAAAG  
ATTAAGAAGTGAAGGAACTCGGCAAACACAAACCCCGCCTGTTTACCAAAAACATCAC  
CTCCAGCATTTCAGTATTGGAGGCACTGCCTGCCCGGTGACATCAGTTAAACGGCCGCGGT  
ATTCTGACCGTGCAAAGGTAGCATAATCATTGTTCTCTAAATAAGGACTTGTATGAACGGC  
CACACGAGGGTTAACTGTCTCTTACTTCCAATCAGTGAAATTGACCTCCCGTGAAGAGGC  
GGGATAAGACAATAAGACGAGAAGACCTATGGAGCTTTAATTAATACTAATTCAAAAAGAA  
ACTACTAACGACCCAACAGGAATAATATATCTCTTTTATGAATTAGCAATTTAGGTTGGGGC  
GACCTCGGAGGACAAAATAGCCTCCGAGTGATTATAAATCTAGACTTACCAGTCAAAATGCT  
TAATCACTTATTGATCCAAAAATTCTTTTGATCAACGGAACAAGTTACCCTAGGGATAACAG  
CGCAATCCTATCCGAGAGTCCATATCGACAATAGGGTTTACGACCTCGATGTTGGATCAGGA  
CATCCTAATGGTGCAGCAGCTATTAAAGGTTTCGTTTGTTCACGATTAAAGTCCTACGTGAT  
CTGAGTTCAGACCGGAGCAATCCAGGTTCGTTTCTATCTATTCAAATAATTTCTCCCAGTACG  
AAAGGACAAGAGAAATAAGGCCTACTTCTCTGAAGCGCCTTAAGACCAATAGATGAATTTA  
TCTAAATCTAGTAAATCTAACTCCAATATTGCCAAGAGACAGGGCTTTGTTAGGGTGGCAG  
AGCCCGGTAATTGTGCAAACTTAACTCTTGTGTCCAGAGGTTCAATTCCTCTCCCTAGCAT  
ATGTTTATAATTAACATCTTCTCACTAATTGTACCTATTCTTCTTGCTGTAGCCTTTCTGACTC  
TAGTAGAACGAAAAGTACTAGGCTACATACAGCTTCGAAAAGGCCCAAATATTGTAGGTCC  
ATATGGTCTCCTACAACCAATCGCAGATGCCGTAAAACTCTTTACTAAAGAACCTTTACGAC  
CACTTACGTCATCCATAACTATATTTATTATAGCCCCTATTCTAGCCTTAACACTAGCTCTGA  
CCATGTGAGTCCCCTTACCAATACCGCACCCCCTATTAAACATAAACCTAGGAGTACTATTC  
ATACTAGCTATATCAAGTCTAGCTGTATACTCTATTCTCTGATCTGGATGAGCCTCAAACCTCA  
AAATATGCCCTAATTGGAGCCCTACGAGCCGTAGCTCAAACGATCTCATATGAAGTCACACT  
AGCCATTATCCTTTTATCCGTTCTACTAATAAATGGCTCATTTACGCTATCCACGCTAATCAT  
TACCCAAGAACATCTTTGATTAATCTTCCCTGCATGACCACTAGCTATAATATGATTTATTTT  
TACCCTAGCAGAAACAAATCGAGCCCCCTTTGACCTAACAGAAGGAGAATCAGAAGTACTGTC  
TCTGGGTTTAAATGTGCAATATGCAGCAGGTCCATTTGCCCTGTTCTTCTAGCAGAATATGCC  
AACATCATCATAATAAATGCTCTTACAACCTATTCTATTCTTCGGAGCATTTTACAGCCCCTAC  
ATACCAGAATTATACATTGTTAATTTTACCGTAAAACTTTACTCCTCACAATCTCTTTTCTA  
TGAATCCGAGCATCATATCCTCGATTCCGATACGACCAACTAATACACCTACTATGAAAAAA  
CTTTCTACCTCTCACACTAGCTCTATGTATATGACATGTAACCTCTACCTATTATTACAGCAAG  
CATTCCACCTCAAACGTAAGAAATATGTCTGACAAAAGAATTACTTTGATAGAGTAAGCCAT  
AGGGGTTTAAAGTCCCCTTATTTCTAGAATCATAGGAATCGAACCTAATCTTAAGAAGTCAAA  
AATCTTCGTGCTACCTAACTACACCATATCCTAAAGTAAGGTCAGCTAAATAAGCTATCGGG  
CCCATACCCCGAAAATGTTGGTTTATCCCCTTCCCATACTAATAAAACCAGCCATCCTTATTA

CCATTATATCCACCGTTGTCTTAGGAACTATAATTGTTCTATTTAGCTCCCCTGATTTCATAA  
TCTGAGTTGGCTTTGAAATAAATATACTAGCCATTATCCCAATTCTAATAAAAAAATATAAC  
CCACGAGCCATAGAAGCTTCCACAAAATATTTTCTAACACAAGCTACAGCATCCATGCTTCT  
AATGCTAAGCATCATCATCAATCTACTATGCTCAGGACACTGGACAGTTTCAACAATTCCCA  
ATCCAGTAGCATCTACCATAATTACTATTGCTCTAACAAATAAACTTGGCCTATCACCATTTC  
ACTTTTGAGTCCCAGAAGTTACACAAGGCATTTCTTATCTTCAGGAATAATCCTATTAACAT  
GACAAAAAATTGCACCTTTATCCATTCTATACCAAATTTACCATCCGTTAACTCAAATCTCT  
TACTAATAATAGCTATCACATCCATACTGGTAGGAGGCTGAGGAGGATTAAATCAAACCCA  
ACTCCGAAAAATCTTGGCATACTCCTCAATTACCCATATAGGCTGAATGGCTGCTATTATAG  
TATATAATCCTACCCTAGCAATTCTTAACCTAACAAATTTACATCATAATAACTCTAGGAACAT  
TTATACTATTTCATACATAGCTCATCTACAACAACACTATCACTATCTTATACATGAAATAAAT  
TCCCATTAAATAGCCCCACTAATCTTAATACTTATACTATCACTAGGAGGCCTCCCTCCTCTCT  
CAGGCTTTATCCCCAAATGAATAATTATTCAAGAATTAACAAAAAACGACATAATTATTATA  
CCTACACTTATAGCCATTACAGCCCTACTAAACCTATATTTTTACACACGCCTAACATATACT  
ACAGCACTAACTATATTTCCCGCAACAAATAATAAAAAATAAAATGACAATTCAAAACCA  
CAAAAAAGACAACCTCTCCTAGCCCCCTCTAATCGTGACATCAACTATACTACTACCACTAACC  
CCAATACTAGCAGCTCTTGATTAGAGATTTAGGCTAAACAGACCAAGGGCCTTCAAAGCCTC  
AAGTAAGTGAAAAATCCACTTAATCTCTGCAATATTTAAGGACTGCAAGAATCTATCTCACAT  
CAACTGAACGCAAAACAATCGCTTTAATTAAGCTAAGCCCTTCTAGATCGGTGGGCTTTTAC  
CCCACAAAACCTTTAGTTAACAGCTAAAAACCCTAGACAACCTGGCTTCAATCTACTTCTCCCG  
CCGCGTAGGAAAAAAGGCGGGAGAAGCCCCGGCAGAATTGAAGCTGCTTCTTTGAATTTG  
CAATTCAATATGATTACTCACCACAGAGCCTGGTAAAAAGAGGACTTAACCCCCATTCTTAG  
ATTTACAGTCTAGTGCTTTTATCAGCCATTTTACCTATGTTTATTAAACCGATGACTGTTTTCCA  
CCAACCACAAGGATATTGGCACTCTTTATCTTCTGTTTGGCGCATGAGCTGGTATAACGGGC  
ACTGCTCTTAGCCTTCTAATCCGTGCTGAATTAGGTCAGCCTGGAGCTCTGTTAGGAGATGA  
CCAAATTTACAATGTAGTTGTAACCTGCCACGCATTTCGTAATAATCTTCTTTATAGTTATGCC  
TATTATGATCGGAGGCTTTGGAAATTGACTAGTACCTTTGATAATTGGTGCGCCTGATATAG  
CATTTCCCCGAATAAACAATATGAGTTTCTGATTACTACCTCCATCCTTTCTTCTCCTTCTGGC  
TTCTTCCATAGTAGAAGCAGGCGCAGGGACTGGATGAACCTGTATACCCCCCTCTAGCAGGTA  
ACTTAGCCCATGCAGGAGCATCAGTAGACCTAACAAATCTTTTCTCTACATCTGGCAGGGGTT  
TCTTCTATTTTAGGGGCTATTAACCTTTATTACCACTATCATCAACATGAAACCCCCCTGCAATA  
TCTCAATATCAAACCTCCCCATTCGTGTGATCAGTACTTATCACAGCAGTACTTCTCCTTCTA  
TCTTTACCAGTCTTAGCAGCCGGAATTACTATACTACTTACAGATCGAAATCTCAATACTACT  
TTCTTCGACCCGGCCGGAGGAGGGGATCCCATTCTATATCAACATCTATTTTGATTCTTTGGC  
CATCCTGAAGTCTATATTCTAATCCTCCCTGGGTTTGGGAATAATTTACACATTGTACATAC  
TATTCAGGAAAGAAAGAGCCCTTTGGTTATATGGGAATAGTGTGGGCAATAATGTCAATTGG  
GTTCTTAGGATTTATTGTATGGGCCCATCATATATTTACTGTAGGCATAGATGTTGATACACG  
AGCCTATTTTACCTCGGCCACTATAATTATTGCAATCCCGACAGGAGTTAAAGTATTTCAGCT  
GACTAGCTACCCTGCATGGAGGAAATATTAAGTGATCCCCTGCCATAATGTGAGCCCTAGGT  
TTCATTTTTCTATTTACAGTAGGGGGTCTTACAGGCATTGTTCTAGCTAACTCATCTCTGGAC  
ATTGTCCTCCATGACACATACTACGTAGTAGCACACTTCCACTATGTACTATCAATAGGGGC  
CGTGTTTCGCTATTATAGGAGGCTTCGTCCATTGATTCCCATTATTTTCGGGGCTATACACTTAA  
TAATACATGAGCAAAAATTCACTTCGTAATTATATTTGTTGGAGTCAATATAACATTCTTCCC  
CCAGCACTTCCTAGGTCTATCAGGTATGCCTCGACGATATTCTGATTATCCAGACGCCTATAC  
AGCATGAAACACAGTGTCTTCAATGGGTTTCATTTCATTTCATAACAGCAGTTATGTTAATAA  
TTTTCATAAATTGAGAAGCCTTCGCATCTAAACGAGAAGTGGCAGTGATTGAGCTTACTACA  
ACTAATATTGAATGGCTCCACGGATGTCTCCCCCATACCATACATTTCGAAGAGCCCGCCTA  
CGTCATACTGAAATAAGAAAGGAAGGAATCGAACCCCTCTAGAATTGGTTTCAAGCCAACAT  
CATAACCACTATGTCTCTCTCAATAAAGAGGTATTAGTAAAAATTACATAACTTTGTCAAAG  
TTGAATTATAGGTGAAAATCCTTTATATCTCTATGGCGCATCCCTTTCAAACAGGCCTTCAAG  
ATGCAACTTCCCCCATCATGGAAGAACTCCTACACTTCCATGATCATACACTAATAATTGTAT



TCTTAATTAGTTCCTTAGTTCTCTATATCATTTCAATTATATTAACACTAAATTAACACATAC  
AAATACAATAGACGCACAAGAAGTGGAGACAGTATGAACTATTCTACCAGCTATCATCTTA  
ATTATAAATTGCACTTCCATCACTACGAATTCCTTTATATGATAGATGAAATTAATAACCCATCA  
TTAACTGTAAAGACTATGGGGCATCAATGATACTGAAGCTATGAGTATACAGATTATGAAGA  
CTTGAGCTTCGATTCTTATATAACCCCAACACAAGAATTAAGCCCGGAGAGCTGCGATTAC  
TAGAGGTAGATAATCGAGTAGTACTACCCATAGAAATAACAATTCGCATATTAATTTCTCA  
GAAGATGTGCTACATTCGTGAGCTGTCCCATCTCTAGGACTAAAACTGATGCAATCCCGGG  
GCGATTAAATCAAACAACCTCTTATGGCCATGCGACCAGGACTATATTATGGCCAATGCTCAG  
AGATTTGCGGTTCTAATCATAGCTTTATACCCATTGTACTTGAAATAGTTCCGCTGTCTTACT  
TTGAAAAATGATCCGCTTCAATACTATAAAATCATTAAGAAGCTTTATAGCGTTAACCTTTTA  
AGTTAAAGACTGAGAGTGCAAGTCTCTCCTTAATGGAAATGCCACAATTAGACACATCCACA  
TGATTTATTACAATCCTATCCATGATCTTAACACTATTTATTATATTTTCAGTTAAAAGTCTCA  
AAACACAACCTATCCTGAGTTTCTGAATTAACCAACCCCACTATCAAAAAACCTATGCC  
TTGAGAAGAAAAATGAACGAAAAATCTGTTGCGCTCTTTTACTACCCCAATGATAATAGGAGT  
ACCAATTGTGGTTCTGATTATTATTTCCCAAGTATCTTATTTCCCTCACCTAATCGATTAATC  
AATAACCGCCTAGCTACTGTCCAACAATGATTAATTCAATTAGTATCTAAGCATATACTGTCT  
ATTCACAATTATAAAGGACAAACCTGAGCGCTAATACTAATGTCATTAATTTTATTATTGGC  
TCAACTAACCTTTTAGGCCATTACCACATTCATTCACACCTACTACACAACCTATCAATAAAT  
TTAGGAATGGCCATTCTCTGTGAGCAGGTACAGTAGTTATAGGATTTGACACAAAACTAA  
GGCATCTCTGGCCCACTTTCTACCTCAAGGAACACCTCTTCTCTGATCCCAGTGTTAGTAAT  
TATCGAGACAATTAGTCTGTTTATTCAACCTGTGGCCCTAGCTGTACGACTGACCGCTAATAT  
TACTGCAGGCCATCTACTTATTCATTTAATCGGAGGGGCTACCCTAGTTTTAATAAACATTAA  
CCCTGTAACAGCCCTAATTACCTTTATTATTCTTATTCTACTTACTATTCTCGAATTAGCTGTA  
GCTCTTATCCAAGCCTATGTTTTACCCCTACTAGTTAGTCTATACTTACATGATAATACCTAA  
TGATCCACCAAACACATGCATATCATATAGTTAACCCAAGCCCATGGCCACTTACAGGAGCT  
CTCTCGGCTCTTCTTATAACATCAGGACTAATTATATGATTTCACTTTAACTCGGTATACTTA  
CTAATACTAGGCCTCACCACCAACATACTTACCATGTACCAATGATGACGAGATATCGTCCG  
GGAAAGTACCTTCCAAGGCCATCACACCCCAATCGTCCAAAAAGGACTACGATATGGAATA  
GTCTTATTTATTGTATCAGAAGTATTTTTCTTCGCGGGATTCTTTTGGGCCTTCTACCACTCAA  
GCCTAGCACCTACTCCTGAATTAGGAGCATGTTGACCACCTACAGGTATCATCCCCTTAAAT  
CCGCTAGAAGTTCCACTACTTAACACCTCTGTACTTTTAGCATCTGGGGTATCTATCACTTGA  
GCCCATCATAGTCTAATAGAAGGAGACCGTAAACATATGCTCCAAGCCCTATTTATTACTAT  
TTCACTAGGAGTTTATTTTACACTTCTACAAGCCTCAGAATACTATGAGACATCCTTTACTAT  
TTCAGATGGAGTGTATGGTTCAACCTTCTTTATAGCAACTGGATTTTCATGGGCTTCATGTAAT  
TATTGGTTCAACTTTTCTTACTGTGTGTTTTCTACGACAACCTGCACTTTCACTTTACATCCAAC  
CATCACTTTGGCTTTGAAGCGGCAGCATGATACTGACACTTCGTAGACGTTGTATGGCTTTTC  
CTTTATGTTTCTATTTACTGATGAGGATCCTACTTCTTTAGTATTAACCTAGTACGATTGACTTC  
CAATCAATAGGCTCTGGTACAAGCCAGAAAGAAGTAATAAACCTAATTCTAGCACTTCTAAC  
CAACGTATTATTAGCCTCTCTGCTCGTTCTTATTGCATTCTGACTGCCACAACCTAAATATCTA  
TGCAGAAAAAGTAAGTCCTTATGAATGTGGATTTGATCCTGTAGGATCAGCACGCCTTCCTT  
TCTCTATAAAATTTTTTCTAGTAGCTATTACATTCCTTTTATTCGACTTAGAAATTGCTCTACT  
CCTCCCGCTTCCTTGAGCATTACAGACTAACAACCTAATAACTATACTTATTATAGCTCTATT  
ACTCATTTCCCTATTAGCCGCAAGCCTAGCTTATGAGTGAACCGAAAAGGGGCTAGAATGGG  
CCGAATATGATAATTAGTTTAACTAAAATAAGTGATTTTCGACTCACTAGATTATGACTAAC  
ATCATAAATTATCAAATGTCTGTGGTCTATATTAATCTCTTTCTAGCCTTTACTATATCCTTAAT  
AGGGCTACTCATCTACCGATCCCATTTAATATCCTCCCTATTATGCTTAGAAGGCATGATGCT  
GTCATATTTGTTATACTAACAGTAACAATCCTAAGTAACCACTTCACACTAGCCAGTATGA  
CTCCAATCATTCTATTAGTATTCGCTGCCTGTGAAGCAGCGTTGGGGCTTTCTCTGCTAGTAA  
TAGTCTCTAATACCTATGGAACCTGACTACGTACAAAATCTTAACCTCCTACAATGCTAAAAA  
TTATCCTCCCTACCATAATACTAGTACCCCTTACATGAATATCAAAGCCTAACATAATCTGAA  
TTAATACAACAACCTATAGTCTACTCATCAGCCTTATTAGTCTGACATATCTCAATCAACTCA

GTGATAATAGTCTAAACTTCTCATTAAACATTCTTTACCGACTCCCTATCAGCCCCCTGTTAG  
TTCTCACAACATGACTACTGCCCTTAATACTTATAGCTAGTCAATTTACCTGTCAAAAGAGA  
CCCTGACCCGGAAAAAATTATATATCACAATACTAATTCTCCTGCAACTATTCTTAATTATAA  
CATTTTCTGCTACTGAGTTAATCATATTCTATATTTTATTTGAAGCTACCCTGGTACCGACTTT  
AGTTATCATTACTCGATGAGGAAACCAAACAGAACGACTAAACGCGGGCCTCTATTTTTTAT  
TCTACACCTTAGTAGGATCCTTGCCCTTACTAGTTGCACTGTTATATGCCAAAACAGCTTAG  
GATCACTAAATTTTCTCATAGTACAGTACTGAACTCAGCCCTTGCCAAATTCCTGATCTAACA  
TTTTCATGTGGCTGGCATGTATAATAGCATTATAGTAAAAATACCGCTATATGGCTTACACC  
TATGACTACCCAAAGCACATGTAGAAGCTCCTATTGCAGGATCCATAGTACTTGCTGCAGTA  
CTTCTAAAACTAGGGGGATACGGTATAATGCGGATTACAACAATACTCAACCCTCTAACAAA  
TTTTATAGCCTACCCCTTCATAATGCTCTCACTATGAGGAATAATCATAACAAGTTCTATTTG  
TTTACGCCAGACAGACCTAAAGTCCCTAATTGCATACTCCTCTGTTAGTCACATAGCCCTAGT  
CATTGTAGCAATTCTAATCCAATCCCCATGAAGCTACATAGGAGCTACTGCTCTAATAATCG  
CCCATGGGTAAACATCTTCTATGCTATTCTGTCTTGCAAACCTCTAACTACGAGCGAACCATA  
GCCGAACATAATTCTCGCACGGGGCTTGCAAACGCTTCTTCCACTTATAGCAGCTTGATGA  
CTATTAGCAGGCCTAACTAACTTAGCTCTTCTCCTACAATTAATCTGATTGGGGAACGTGTT  
GTAGTGATAGCCACATTTTCATGATCCAATATTACCATTCTCTTAATAGGAGTTAACATTACC  
ATTACTGCTCTCTACTCTCTATATATACTAATTTCTACACAGCGAGGCAAGTATACAGACCAC  
ATCAAAAATATTAAGCCATCTTATACACGAGAAAAATGCCTTAATAGCCTTACATTTACTACC  
CCTTTTACTTCTATCTCTTAACCCTAAAGTAGTTCTAGGCTTTATTTACTGTAAATATAGTTTA  
ACAAAAACATTAGATTGTGAATCTAGTAATAAAAGCTTAAATCTTTTTATTTACCGAAAAAG  
CATGCAAGAACTGCTAATTCATGCACCCATGCATAAAATCATGGCTTTTTCAACTTTTAGGG  
GATAGAAGTAATCCATTGGTCTTAGGAGCCAAAAAATTGGTGCAACTCCAAATAAAAGTAA  
TTAACCTACTTACCTCCTTCACCATTACAACCTCTATTTATATTAATCATGCCATTATCCTAAC  
CTGTACCCCAGCATATGAAAATAAACTTTACCCGCAATATGTAAAAACCACAGTCTCTTATG  
CCTTCACAATTAGCATAATTCCCATAGTAATATTCATCCACTCCGGACAAGAAGCAATCATC  
TCAAACCTGACACTGAATAACCATCCAAACCCTAAAACCTCAGTCTAAGCTTCAAATTAGATTA  
CTTTTCAATAATCTTCGTACCAGTGGCCCTATTTCGTCACATGGTCAATTATAGAATTCTCTAT  
ATGATATATACACGCAGATCCTAACATTAACCGATTCTTTAAATATCTACTTATATTCTCGT  
CACGATAATAATTCTAGTAACCGCAAATAATCTATTTTACGCTATTCATCGGCTGAGAGGGAG  
TAGGAATCATATCATTCTCCTCATTGGATGATGATATGGACGAACAGATGCTAATACGGCT  
GCCCTACAAGCAGTACTATACAACCGCATTTGGAGATGTTGGTTTTATCATGGCCATAGCTTG  
ATTCTTACTCAATACTAATGCATGGGACTTCCAACAAATCTTTATAATCGAACATAAAAACC  
TCAATATTCCACTGGCAGGACTACTTCTAGCAGCTACCGGAAAGTCTGCCCAATTTGGACTT  
CATCCATGACTCCCATCAGCCATAGAAGGCCCCACTCCTGTCTCAGCACTACTTCACTCTAGC  
ACAATAGTAGTAGCAGGCGTATTTCTTCTAGTCCGGTTTCACCCCTTAATAGAACATAACAA  
GACAATTCAAACGGTTACCCTATGCTTAGGGGGCAATAACAACCTTGTTTACAGCAATCTGCG  
CCCTTACCCAAAATGATATCAAAAAAATTATTGCCTTCTCCACCTCGAGCCAACTAGGACTA  
ATAATTGTAACAATTGGTATTAATCAGCCTCATCTGGCCTTTCTCCATATCTGCACGCACGCA  
TTCTTCAAGGCCATGCTATTTCTATGCTCCGGATCTATTATTCATAGTCTAAACAACGAACAA  
GATATTTCGAAAGATAGGAGGGGCTATTTAAAAGTCTACCATTTACCACTACTGCTCTAATCAT  
CGGAACTCTAGCACTTACAGGAATGCCCTTCTTAACAGGATTTTACTCCAAAGACTTAATTA  
TTGAAACCGCCAATACGTCATACACCAACGCCTGAGCCTTACTAACAACCTTATCGCCACA  
TCCATAACTGCCGCCTACAGTACTCGAATTGTATTTTTTACACTTCTAGGACAACCTCGCTAT  
AGTCCCATATCACCATTAACGAGAATAACCAGTTCCTGACTAACTCTGTCAAACGATTGCT  
ACTAGGAAGTATCTTTGCGGGATTCTTAATCTCTCATAACATTACACCCACCACTGTCCCACA  
AATAACCATGCCCTGTCACCTAAAAATGATAGCCCTTACAGTAACAATCCTAGGCTTTATTC  
TAGCACTAGAACTTAACCTAGCCATACAAAATCTCAAATTTGACTACCCGTTAAGCACGTTT  
AAATTTTCAAATCAACTAGGATATTTCCCTACTACTCTGCATCGTCTCGCACCAATAATAGGT  
CTATCAATAAGCCAAAAAACAGCATCCATACTGCTAGATGCAATCTGACTAGAGAATGTTCT  
ACCAAAGTCCATCTCCTACTTTCAAATAAAATCCTCAATCACAGTCTCCAACCAAAAGGGAC

TAATTAAACTATACTTTCTCTCCTTTATAATTACACTAATCTTAAGTCTCTTTATACTTAATTT  
CCACGAGTGACTTCCATAATTACCAATACACCAATAAGGAGAGATCATCCAGTAACAATAA  
CTAATCAAGTACCATAACTATATAAAGCTGCAATTCCCATAGCCTCTTCACTAAAAAATCCT  
GAATCCCCTGTATCATAAATCACCCAATCTCCTATTCCATTAAACTTAAATACTACCTCGGCT  
TCATCATCCTTTAAAATATAACAAACAGCCAGTAACTCAGACAACAGACCTACAATAAATGC  
ACCTAGTACAGCCTTATTAGAAAAGTCAAACCTCAGGATATTGCTCAGTGGCTATGGCCGTAG  
TGTACCCGAACACTACAAGTATACCCCCTAAATAAATTAAAAAGACCATTAAACCCAAAAA  
AGATCCTCCAAAGCTTAACACAATACCACACCCTACACCCCCACTAACAATCAAGACTAAAC  
CTCCGTAGATAGGAGAGGGCTTAGAAGAAAACCCCGCAAAACTAACTACAAAAACGATACT  
TAAAATAGATACAATGTATGTTATCATCATTCTTACATGGAATCTAACCATGACCAATGACA  
TGAAAAATCATCGTTGTATTTCAACTATAAGAACCCCAATGATCAACATCCGAAAAACTCAT  
CCATTAGTTAAAATTATCAACAACCTCATTGACCTTCCAACACCATCAAACATTTCAACA  
TGATGGAACCTTGGGTCCCTGTTAGGAGTGTGTCTGATCTTGCAAATCTTAACAGGCTTATTT  
CTAGCCATACACTATACATCAGATACAGCTACAGCCTTTTCATCAGTCGCACACATTTGTCTG  
AGACGTCAACTATGGTTGATTTATCCGATATATACATGCCAATGGGGCCTCTATATTTTTTAT  
CTGCCTATTTATACACGTAGGGCGAGGCTTATACTATGGATCATACCTATTTCCAGAGACAT  
GGAATATCGGAATTATTCTCCTACTTACAGTTATAGCCACAGCATTTCATAGGATATGTACTA  
CCTTGAGGACAAATATCCTTCTGAGGAGCAACCGTCATTACTAACCTACTATCAGCAATTCC  
TTACATTGGCACTAATCTAGTGGAGTGAATCTGAGGGGGTTTCTCCGTAGATAAAGCAACAC  
TAACCCGATTTTTTGCTTTTCACTTTATCCTTCCATTTATCATCTCAGCACTAGCAATAGTCCA  
TCTATTATTCTTCACGAAACAGGATCTAATAACCCCTCCGGAATTCCATCTGACCCAGACA  
AAATCCCATTTTACCCCTATCATACAATTAAGACATCCTAGGCGTCCTATTTCTTGTCTCG  
CCTTAATAACCCCTGGCTTTATTCTCACCAGACCTGTTAGGAGACCCTGATAACTATACCCCTG  
CAAATCCACTAAGTACCCCGCCACATATTAAGCCTGAATGGTACTTTCTATTTGCCTACGCTA  
TCCTGCGATCTATCCCTAATAAACTAGGAGGGGTGCTAGCTCTAATCTTCTCTATTCTAATTC  
TAACTATTATTCCACTATTACATACATCCAAACAACGAAGCATGATATTCCGACCTCTAAGT  
CAATGCTTATTCTGACTCCTAGTAGCAGACCTACTCACACTAACATGAATTGGAGGACAGCC  
AGTAGAACACCCCTTCATTATTATTGGGCAATTGGCCTCTATTCTCTACTTTACAATTCTTCT  
AGTACTTATACCTATCACTAGCATTATTGAGAATAGCCTCTCAAAATGAAGAGTCTTTGTAG  
TATATTAATTACTTTGGTCTTGTAACCAAAAACGGAGATTCCTCTACTTCTCCCTAAGACTC  
AAGGAAGGAGCAACAACCCCACTACCAGCACCCAAAGCTGGTGTCTACTTAACTATCCCC  
TG

>SRR6109209 (circular) ReOrganized

ATACTATAAATCCACCTCTCATTTTATTCACTTCATACATGTTATTACACACTCTGTGCCATC  
ATAGTATGTTTTATACATCCTCCCTTCTTTCACACCCTATGTATATCGTACATTAATGGTGTA  
CCCCCCCCCTCCCCCTATGTATATCGTGCATTAATGGCGTGCCCCATGCATATAAGCATGTAC  
ATACTGTGCTTGGCTTTACATGAGGATACTCATTACAAGAACTTATTTCAAGCGATAGTCTAT  
GAGCATGTATTTCACTTAGTCCAAGAGCTTGATCACCAAGCCTCGAGAAACCAGCAATCCTT  
GCGAGTACGTGTACCTCTTCTCGCTCCGGGCCCATAAATTTGTGGGGGTTTCTATACTGAACT  
ATACCTGGCATCTGGTTCTTACCTCAGGGCCATGTTAGCGTCAACTCAATCCTACTAACCCTT  
CAAATGGGACATCTCGATGGACTAATGACTAATCAGCCCATGATCACACATAACTGTGGTGT  
CATGCATTTGGTATTTTTTAATTTAGGGGGGGAACCTTGCTATGACTCAGCTATGACCGTAAA  
GGTCTCGTCGCAGTCAAATCAGCTGTAGCTGGGCTTATTCATCTTTCGAGGCTCCTCATAGAC  
ACCCATAAGGTGCAATTCAGTCAATGGTCACAGGACATAACACTATAGATCACCCGGACTG  
GCGTTACGTGTACGCACGTGTACGCACGTGTACGTACGTGTACGCACGTGTACGTACGTGTA  
CGCATGTGTACGTACGTGTACGCACGTGTACGTACGTGTACGTACGTGTACGCACGTGTACG  
CACGTGTACGCACGTGTACGCACGTGTACGCACGTGTACGTACGTGTACGCACGTGTACGCA  
CGTGTACGCACGTGTACGCGTACGTATTTTAGATACTAAGTTAGCTTAGACAAACCCCCCTT  
ACCCCCCGTAACTTCAAGAAGCTTACATATACTTATGGATGTCCTGCCAAACCCCAAAAACA  
AGACTAAATATATGCGCAAACATGAAGTCACTTACACCTAAACCCATATAATTAAGCTAACC  
CCCCAGCCAATGTTGCAACAACACTACGGACATGGGACTCTAAATTTTAATTTATCTATAGATA

TTTTTCTTTTACTGTGTCTCCCCAGCATTGATTTTTTAACTATCATTATTCCACACCACCAATT  
TCCATTGAGCTATTTTCACATGAGTTCCAAATCAATTATGTTTCATGTAGCTTAACGAATAAAGC  
AAGGTACTGAAAATGCCTAGATGGGTACGCTACCCCATAGACATAAAGGTTTGGTCCTAGC  
CTTCCTATTAGCCATTAACAAGATTACACATGTAAGTCTCCACGCTCCAGTGAAAATGCCCC  
TTAAGTCCTCTTAGACGACCTAAAGGAGCGGGTATCAAGCACACCTTATGGTAGCTCACAAC  
GCCTTGCTTAGCCACACCCCCACGGGAAACAGCAGTGATAAAAATTAAGCTATGAACGAAA  
GTTGCGACTAAGCTATGTTAATACTAGGGTTGGTAAATCTCGTGCCAGCCACCGCGGTCATAC  
GATTAACCTCGAGTTAATAGGCCTACGGCGTAAAGCGTGTAAGAGAAAAAATCTCCTCTACTA  
AAGTTAAAGTATGATTAAGCTGTAAAAAGCTACCATTAATACTAAAATAAACTACGAAAGT  
GACTTTAAAATTTCTGATTACACGATAGCTAGGGCCCCAACTGGGATTAGATACCCCACTAT  
GCCTAGCTCTAAACATAGATATTTTACTAAACAAAACCTATTCGCCAGAGAACTACTAGCAAC  
AGCTTAAAACTCAAAGGACTTGGCGGTGCTTTATATCCCCCTAGAGGAGCCTGTTCTGTAAT  
CGATAAACCCCGATAGACCTCACCATCCCTTGCTAATTCAGTTTATATACCGCCATCTTCAGC  
AAACCCTTAAAGGAAAAAAGTAAGCATAACTACCCTACATAAAAAAGTTAGGTCAAGGT  
GTAACCTATGGGCTGGGAAGAAATGGGCTACATTTTCTATTCAAGAACAACCTTCTACGAAAA  
CTTTTATGAAACTAAAAGCTAAAGGCGGATTTAGTAGTAAATTAAGAATAGAGAGCTTAATT  
GAACAGGGCAATGAAGCACGCACACACCCGCCCGTCACCCTCCTCGAGTGATATAATTTAATT  
ATAACCTATTTAACTAAGCAAAGCATAAGAGGAGACAAGTCGTAACAAGGTAAGCATACT  
GGAAAGTGTGCTTGGATGAGCCAAAGTGATAGCTTAAACAAAGCGTCTGGCTTACATCCAGA  
AGATTTTCATTAATATATGACTACTTTGAACCCAAAGCTAGCCCAAGCAACAATGACTAGTAA  
AACCATTATGAAACATTCAAACAAAACATTTAGTAGCATGACTAGAGTATAGGAGATAGAA  
ATTTTAACTGGAGCTATAGAGAGAGTACCGCAAGGGAATGATGAAAGATTACCTAAAGTG  
ATAAACAGCAAAGATTGCCCTTCTACCTTTTGTATAATGAGTTAGCTAGAAATAACTTAAC  
AAAGAGAACTTAAGCTAAGTCCCCCGAAACCAGACGAGCTACCTATGAACAATCCACTGGG  
ATGAACTCATCTATGTTGCAAAATAGTGAGAAGATCCATAGGTAGAGGTGAAAGGCCTAAC  
GAGCCTGGTGATAGCTGGTTGCCCAGAATAGAATTTTAGTTTCGACTTTAAACCTGCCTACAA  
AACTAATAATTCTAATGCAGATTTAAAATATATTCTAAAAAGGTACAGCTTTTTAGAGTTAA  
GGATACAGCCTTACTTAGAGAGTAAATATTTATATAAGCCATAGTAGGCCTAGAGGCAGCCA  
TCAATTAAGAAAGCGTTAAAGCTCAACATCTCTATTAACCTAATAACCAAGAATATTTAATCA  
ACTCCTAATGTATTACTGGGTCAATCTATTTAAATATAGAAGTGATAATGCTAATATGAGTA  
ACAAGAAATATTTCTCCCATGCATAAGCTTATAACAGCAACGGATAACCACTGATAGTTAAC  
AACAACATAGAAATAACCTAATGATAAAACACCTATTAAATCAATTGTTAGTCCAACACAG  
GCATGCAATCAGGGAAAGATTAAAAGAAGTGAAAGGAACTCGGCAAAACACAAACCCCGCCT  
GTTTACCAAAAACATCACCTCCAGCATTTCCAGTATTGGAGGCACTGCCTGCCCGGTGACAT  
CAGTTAAACGGCCGCGGTATTCTGACCGTGCAAAGGTAGCATAATCATTTGTTCTCTAAATA  
AGGACTTGTATGAACGGCCACACGAGGGTTTAACTGTCTCTTACTTCCAATCAGTGAAATTG  
ACCTCCCCGTGAAGAGGCGGGGATAAGACAATAAGACGAGAAGACCCTATGGAGCTTTAAT  
TAACTAATTCAAAAAGAACTACTAACGACCCAACAGGAATAATATATCTCTTTTATGAATT  
AGCAATTTAGGTTGGGGCGACCTCGGAGGACAAAATAGCCTCCGAGTGATTATAAATCTAG  
ACTTACCAGTCAAAATGCTTAATCACTTATTGATCCAAAAATTCTTTTGATCAACGGAACAA  
GTTACCCTAGGGATAACAGCGCAATCCTATCCGAGAGTCCATATCGACAATAGGGTTTACGA  
CCTCGATGTTGGATCAGGACATCCTAATGGTGCAGCAGCTATTAAAGGTTTCGTTTGTTC AAC  
GATTAAAGTCCTACGTGATCTGAGTTCAGACCGGAGCAATCCAGGTCGGTTTCTATCTATTC  
AAATAATTTCTCCCAGTACGAAAGGACAAGAGAAATAAGGCCTACTTCTCTGAAGCGCCTTA  
AGACCAATAGATGAATTTATCTAAATCTAGTAAATCTAACTCCAATATTGCCCAAGAGACAG  
GGCTTTGTTAGGGTGGCAGAGCCCGGTAATTGTGCAAACTTAACTCTTGTGTCCAGAGGT  
TCAATTCCTCTCCCTAGCATATGTTTATAATTAACATCTTCTCACTAATTGTACCTATTCTTCT  
TGCTGTAGCCTTTCTGACTCTAGTAGAACGAAAAGTACTAGGCTACATACAGCTTCGAAAAG  
GCCCAATATTGTAGGTCCATATGGTCTCCTACAACCAATCGCAGATGCCGTAAAACCTTTT  
ACTAAAGAACCTTTACGACCACTTACGTCTATCCATAACTATATTTATTATAGCCCCTATTCTA  
GCCTTAACACTAGCTCTGACCATGTGAGTCCCCTTACCAATACCGCACCCCCTTATTAACATA

AACCTAGGAGTACTATTTCATACTAGCTATATCAAGTCTAGCTGTATACTCTATTCTCTGATCT  
GGATGAGCCTCAAACCTCAAATATGCCCTAATTGGAGCCCTACGAGCCGTAGCTCAAACGAT  
CTCATATGAAGTCACACTAGCCATTATCCTTTTATCCGTTCTACTAATAAATGGCTCATTAC  
GCTATCCACGCTAATCATTACCCAAGAACATCTTTGATTAATCTTCCCTGCATGACCACTAGC  
TATAATATGATTTATTTCTACCCTAGCAGAAACAAATCGAGCCCCCTTTGACCTAACAGAAG  
GAGAATCAGAACTAGTCTCTGGGTTTAATGTCGAATATGCAGCAGGTCCATTTGCCCTGTTC  
TTCCTAGCAGAATATGCCAACATCATCATAATAAATGCTCTTACAACCTATTCTATTCTTCGGA  
GCATTTACAGCCCCCTACATACCAGAATTATACATTGTTAATTTTACCGTAAAACTTTACTC  
CTCACAATCTCTTTTCTATGAATCCGAGCATCATATCCTCGATTCCGATACGACCAACTAATA  
CACCTACTATGAAAAAACTTTCTACCTCTCACACTAGCTCTATGTATATGACATGTAACCTCTA  
CCTATTATTACAGCAAGCATTCCACCTCAAACGTAAGAAATATGTCTGACAAAAGAATTACT  
TTGATAGAGTAAGCCATAGGGGTTTAAGTCCCCTTATTTCTAGAATCATAGGAATCGAACCT  
AATCTTAAGAACTCAAAAATCTTCGTGCTACCTAACTACACCATATCCTAAAGTAAGGTCAG  
CTAAATAAGCTATCGGGCCCATAACCCCGAAAATGTTGGTTTATCCCCTTCCCATACTAATAA  
AACCAGCCATCCTTATTACCATTATATCCACCGTTGTCTTAGGAACCTATAATTGTTCTATTTA  
GCTCCCACTGATTTCATAATCTGAGTTGGCTTTGAAATAAATATACTAGCCATTATCCCAATTC  
TAATAAAAAAATATAACCCACGAGCCATAGAAGCTTCCACAAAATATTTTCTAACACAAGCT  
ACAGCATCCATGCTTCTAATGCTAAGCATCATCATCAATCTACTATGCTCAGGACACTGGAC  
AGTTTCAACAATTCCCAATCCAGTAGCATCTACCATAATTACTATTGCTCTAACAATAAACT  
TGGCCTATCACCATTTCACTTTTGAGTCCCAGAAGTTACACAAGGCATTTCCCTTATCTTCAGG  
AATAATCCTATTAACATGACAAAAAATTGCACCTTTATCCATTCTATACCAAATTTACCATC  
CGTTAACTCAAATCTCTTACTAATAATAGCTATCACATCCATACTGGTAGGAGGCTGAGGAG  
GATTAAATCAAACCCAACCTCCGAAAAATCTTGGCATACTCCTCAATTACCCATATAGGCTGA  
ATGGCTGCTATTATAGTATATAATCCTACCCTAGCAATTCTTAACCTAACAATTTACATCATA  
ATAACTCTAGGAACATTTATACTATTTCATACATAGCTCATCTACAACAACACTATCACTATCT  
TATACATGAAATAAATTCCCATTAAATAGCCCCACTAATCTTAATACTTATACTATCACTAGGA  
GGCTCCCTCCTCTCTCAGGCTTTATCCCCAAATGAATAATTATTCAAGAATTAACAAAAAA  
CGACATAATTATTATACCTACACTTATAGCCATTACAGCCCTACTAAACCTATATTTTACAC  
ACGCCTAACATATACTACAGCACTAACTATATTTCCCGCAACAAATAATATAAAAAATAAAAT  
GACAATTCAAAACCACAAAAAAGACAACCTCTCCTAGCCCCCTCTAATCGTGACATCAACTATA  
CTACTACCACTAACCCCAATACTAGCAGCTCTTGATTAGAGATTTAGGCTAAACAGACCAAG  
GGCTTCAAAGCCTCAAGTAAGTGAAAATCCACTTAATCTCTGCAATATTTAAGGACTGCAA  
GAATCTATCTCACATCAACTGAACGCAAAACAATCGCTTTAATTAAGCTAAGCCCTTCTAGA  
TCGGTGGGCTTTTACCCACAAAACCTTTAGTTAACAGCTAAAAACCCTAGACAACTGGCTTC  
AATCTACTTCTCCCGCCGCGTAGGAAAAAAGGCGGGAGAAGCCCCGGCAGAATTGAAGCT  
GCTTCTTTGAATTTGCAATTCAATATGATTACTCACCACAGAGCCTGGTAAAAAGAGGACTT  
AACCCCCATTCTTAGATTTACAGTCTAGTGCTTTTATCAGCCATTTTACCTATGTTCAATTAACC  
GATGACTGTTTTCCACCAACCACAAGGATATTGGCACTCTTTATCTTCTGTTTGGCGCATGAG  
CTGGTATAACGGGCACTGCTCTTAGCCTTCTAATCCGTGCTGAATTAGGTCAGCCTGGAGCT  
CTGTTAGGAGATGACCAAATTTACAATGTAGTTGTAAGTACGCCCACGCATTCGTAATAATCTT  
CTTTATAGTTATGCCTATTATGATCGGAGGCTTTGGAAATTGACTAGTACCTTTGATAATTGG  
TGCGCCTGATATAGCATTTCCCCGAATAAACAATATGAGTTTCTGATTACTACCTCCATCCTT  
TCTTCTCCTTCTGGCTTCTTCCATAGTAGAAGCAGGCGCAGGGACTGGATGAAGTGTATACC  
CCCCCTAGCAGGTAACCTAGCCCATGCAGGAGCATCAGTAGACCTAACAATCTTTTCTCTA  
CATCTGGCAGGGGTTTCTTCTATTTTAGGGGCTATTAACCTTTATTACCACTATCATCAACATG  
AAACCCCTGCAATATCTCAATATCAAACCTCCCCTATTCGTGTGATCAGTACTTATCACAGCA  
GTACTTCTCCTTCTATCTTTACCAGTCTTAGCAGCCGGAATTACTATACTACTTACAGATCGA  
AATCTCAATACTACTTTTCTTCGACCCGGCCGGAGGAGGGGATCCCATTCTATATCAACATCT  
ATTTTGATTCTTTGGCCATCCTGAAGTCTATATTCTAATCCTCCCTGGGTTTGAATAATTTCA  
CACATTGTCACATACTATTTCAGGAAAGAAAGAGCCCTTTGGTTATATGGGAATAGTGTGGGC  
AATAATGTCAATTGGGTTCTTAGGATTTATTGTATGGGCCCATCATATATTTACTGTAGGCAT

AGATGTTGATACACGAGCCTATTTTACCTCGGCCACTATAATTATTGCAATCCCGACAGGAG  
TTAAAGTATTCAGCTGACTAGCTACCCTGCATGGAGGAAATATTAAGTGATCCCCTGCCATA  
ATGTGAGCCCTAGGTTTTCATTTTTCTATTTACAGTAGGGGGTCTTACAGGCATTGTTCTAGCT  
AACTCATCTCTGGACATTGTCCTCCATGACACATACTACGTAGTAGCACACTTCCACTATGTA  
CTATCAATAGGGGCGGTGTTTCGCTATTATAGGAGGCTTCGTCCATTGATTCCCATTATTTTCG  
GGCTATACACTTAATAATACATGAGCAAAAATTCACTTCGTAATTATATTTGTTGGAGTCAA  
TATAACATTCTTCCCCCAGCACTTCCTAGGTCTATCAGGTATGCCTCGACGATATTCTGATTA  
TCCAGACGCCTATACAGCATGAAACACAGTGTCTTCAATGGGTTCATTTCATTTCTACTAACAG  
CAGTTATGTTAATAATTTTCATAATTTGAGAAGCCTTCGCATCTAAACGAGAAGTGGCAGTG  
ATTGAGCTTACTACAATAATTGAATGGCTCCACGGATGTCCTCCCCCATAACCATAACATTC  
GAAGAGCCCCGCTACGTCATACTGAAATAAGAAAGGAAGGAATCGAACCCCTCTAGAATTGG  
TTTCAAGCCAACATCATAACCACTATGTCTCTCTCAATAAAGAGGTATTAGTAAAAATTACA  
TAACTTTGTCAAAGTTGAATTATAGGTGAAAATCCTTTATATCTCTATGGCGCATCCCTTTCA  
AACAGGCCTTCAAGATGCAACTTCCCCCATCATGGAAGAACTCCTACACTTCCATGATCATA  
CACTAATAATTGTATTCTTAATTAGTTCCCTTAGTTCTCTATATCATTTCATTATATTAECTAC  
TAAATTAACACATACAAATACAATAGACGCACAAGAAGTGAGACAGTATGAACTATTCTA  
CCAGCTATCATCTTAATTATAATTGCACTTCCATCACTACGAATTCTTTATATGATAGATGAA  
ATTAATAACCCATCATTAAGTAAAGACTATGGGGCATCAATGATACTGAAGCTATGAGTA  
TACAGATTATGAAGACTTGAGCTTCGATTCTTATATAACCCCAACACAAGAATTAAAGCCCC  
GAGAGCTGCGATTACTAGAGGTAGATAATCGAGTAGTACTACCCATAGAAATAACAATTCG  
CATATTAATTTCTCAGAAGATGTGCTACATTCGTGAGCTGTCCCATCTCTAGGACTAAAAA  
CTGATGCAATCCCGGGGCGATTAAATCAAACAACCTCTTATGGCCATGCGACCAGGACTATAT  
TATGGCCAATGCTCAGAGATTTGCGGTTCTAATCATAGCTTTATACCCATTGTACTTGAAATA  
GTTCCGCTGTCTTACTTTGAAAAATGATCCGCTTCAATACTATAAAATCATTAAAGAAGCTTA  
TAGCGTTAACCTTTTAAAGTTAAAGACTGAGAGTGCAAGTCTCTCCTTAATGGAAATGCCACA  
ATTAGACACATCCACATGATTTATTACAATCCTATCCATGATCTTAACACTATTTATTATATT  
TCAGTTAAAAGTCTCAAAACACAACCTATCCTGAGTTTCCTGAATTA AAAACAACCCCACTAT  
CAAAAAAACCTATGCCTTGAGAAGAAAAATGAACGAAAAATCTGTTTCGCTCTTTTACTACCC  
CAATGATAATAGGAGTACCAATTGTGGTTCTGATTATTATTTTCCCAAGTATCTTATTTCCCT  
CACCTAATCGATTAATCAATAACCGCCTAGCTACTGTCCAACAATGATTAATTCAATTAGTA  
TCTAAGCATATACTGTCTATTACAAATTATAAAGGACAAACCTGAGCGCTAATACTAATGTC  
ATTAATTTTATTTATTGGCTCAACTAACCTTTTAGGCCTATTACCACATTCATTCACACCTACT  
ACACAACCTATCAATAAAATTTAGGAATGGCCATTCTCTGTGAGCAGGTACAGTAGTTATAGG  
ATTTGACACAAAACCTAAGGCATCTCTGGCCCACTTTCTACCTCAAGGAACACCTCTTCTCT  
GATCCCAGTGTTAGTAATTATCGAGACAATTAGTCTGTTTATTCAACCTGTGGCCCTAGCTGT  
ACGACTGACCGCTAATATTACTGCAGGCCATCTACTTATTCATTTAATCGGAGGGGCTACCC  
TAGTTTTAATAAACATTAACCCGTGAACAGCCCTAATTACCTTTATTATTCTTATTCTACTTAC  
TATTCTCGAATTAGCTGTAGCTCTTATCCAAGCCTATGTTTTACCCCTACTAGTTAGTCTATA  
CTTACATGATAATACCTAATGATCCACCAAAACACATGCATATCATATAGTTAAACCAAGCCC  
ATGGCCACTTACAGGAGCTCTCTCGGCTCTTCTTATAACATCAGGACTAATTATATGATTTCA  
CTTTAACTCGGTATACTTACTAATACTAGGCCTCACCACCAACATACTTACCATGTACCAATG  
ATGACGAGATATCGTCCGGGAAAGTACCTTCCAAGGCCATCACACCCCAATCGTCCAAAAA  
GGACTACGATATGGAATAGTCTTATTTATTGTATCAGAAGTATTTTTCTTCGCGGGATTCTTT  
TGGGCCTTCTACCACTCAAGCCTAGCACCTACTCCTGAATTAGGAGCATGTTGACCACCTAC  
AGGTATCATCCCCTTAAATCCGCTAGAAGTTCCTACTTAAACACCTCTGTACTTTTAGCATC  
TGGGGTATCTATCACTTGAGCCCATCATAGTCTAATAGAAGGAGACCGTAAACATATGCTCC  
AAGCCCTATTTATTACTATTTCACTAGGAGTTTATTTTACACTTCTACAAGCCTCAGAATACT  
ATGAGACATCCTTTACTATTTCAAGATGGAGTGTATGGTTCAACCTTCTTTATAGCAACTGGAT  
TTCATGGGCTTCATGTAATTATTGGTTCAACTTTTCTTACTGTGTGTTTTCTACGACAACCTGCA  
CTTTCACTTTACATCCAACCATCACTTTGGCTTTGAAGCGGCAGCATGATACTGACACTTCGT  
AGACGTTGTATGGCTTTTCTTTATGTTTTCTATTTACTGATGAGGATCCTACTTCTTTAGTATT

AACTAGTACGATTGACTTCCAATCAATAGGCTCTGGTACAAGCCAGAAAGAAGTAATAAAC  
CTAATTCTAGCACTTCTAACCAACGTATTATTAGCCTCTCTGCTCGTTCTTATTGCATTCTGAC  
TGCCACAACATAAATATCTATGCAGAAAAAGTAAGTCCTTATGAATGTGGATTGATCCTGTA  
GGATCAGCACGCCTTCCTTTCTCTATAAAAATTTTTCTAGTAGCTATTACATTCCTTTTATTTCG  
ACTTAGAAATTGCTCTACTCCTCCCGCTTCCTTGAGCATTACAGACTAACAACTTAATAACTA  
TACTTATTATAGCTCTATTACTCATTTCCTATTAGCCGCAAGCCTAGCTTATGAGTGAACCG  
AAAAGGGGCTAGAATGGGCCGAATATGATAATTAGTTTAAACTAAAATAAGTGATTTTCGAC  
TCACTAGATTATGACTAACATCATAATTATCAAATGTCTGTGGTCTATATTAATCTCTTTCTA  
GCCTTTACTATATCCTTAATAGGGCTACTCATCTACCGATCCCATTTAATATCCTCCCTATTAT  
GCTTAGAAGGCATGATGCTGTCACTATTTGTTATACTAACAGTAACAATCCTAAGTAACCAC  
TTCACACTAGCCAGTATGACTCCAATCATTCTATTAGTATTCGCTGCCTGTGAAGCAGCGTTG  
GGGCTTTCTCTGCTAGTAATAGTCTCTAATACCTATGGAAGTACTACGTACAAAATCTTAAC  
CTCCTACAATGCTAAAAATTATCCTCCCTACCATAATACTAGTACCCCTTACATGAATATCAA  
AGCCTAACATAATCTGAATTAATACAACAACCTATAGTCTACTCATCAGCCTTATTAGTCTG  
ACATATCTCAATCAACTCAGTGATAATAGTCTAAACTTCTCATTAACATTCTTTACCGACTCC  
CTATCAGCCCCCTGTTAGTTCTCACAACATGACTACTGCCCTTAATACTTATAGCTAGTCAA  
TTTCACCTGTCAAAAGAGACCCGTGACCCGGAAAAAATTATATATCACAATACTAATTCTCCT  
GCAACTATTCTTAATTATAACATTTTCTGCTACTGAGTTAATCATATTCTATATTTTATTTGAA  
GCTACCCTGGTACCGACTTTAGTTATCATTACTCGATGAGGAAACCAAAACAGAACGACTAAA  
CGCGGGCCTCTATTTTTTATTCTACACCTTAGTAGGATCCTTGCCCTTACTAGTTGCACTGTTA  
TATGCCCAAAACAGCTTAGGATCACTAAATTTTCTCATAGTACAGTACTGAACTCAGCCCTT  
GCCAAATTCCTGATCTAACATTTTCATGTGGCTGGCATGTATAATAGCATTTCATAGTAAAAA  
TACCGCTATATGGCTTACACCTATGACTACCCAAAGCACATGTAGAAGCTCCTATTGCAGGA  
TCCATAGTACTTGCTGCAGTACTTCTAAAACCTAGGGGGGATACGGTATAATGCGGATTACAAC  
AATACTCAACCCTCTAACAAATTTTATAGCCTACCCCTTCATAATGCTCTCACTATGAGGAAT  
AATCATAACAAGTTCTATTTGTTTACGCCAGACAGACCTAAAGTCCCTAATTGCATACTCCTC  
TGTTAGTCACATAGCCCTAGTCATTGTAGCAATTCTAATCCAATCCCCATGAAGCTACATAG  
GAGCTACTGCTCTAATAATCGCCCATGGGTAAACATCTTCTATGCTATTCTGTCTTGCAAAC  
CTAACTACGAGCGAACCCATAGCCGAACATAAATTCTCGCACGGGGCTTGCAAACGCTTCTT  
CCACTTATAGCAGCTTGATGACTATTAGCAGGCCTAACTAACTTAGCTCTTCCTCCTACAATT  
AATCTGATTGGGGAACCTGTTTGTAGTGATAGCCACATTTTCATGATCCAATATTACCATTCTC  
TTAATAGGAGTTAACATTACCATTACTGCTCTCTACTCTCTATATATACTAATTTCTACACAG  
CGAGGCAAGTATACAGACCACATCAAAAATATTAAGCCATCTTATACACGAGAAAAATGCCT  
TAATAGCCTTACATTTACTACCCCTTTTACTTCTATCTCTTAACCCTAAAGTAGTTCTAGGCTT  
TATTTACTGTAAATATAGTTTAAACAAAAACATTAGATTGTGAATCTAGTAATAAAAGCTTAA  
ATCTTTTTATTTACCGAAAAAGCATGCAAGAACTGCTAATTCATGCACCCATGCATAAAATC  
ATGGCTTTTTCAACTTTTAGGGGATAGAAGTAATCCATTGGTCTTAGGAGCCAAAAAATTGG  
TGCAACTCCAAATAAAAGTAATTAACCTACTTACCTCCTTCACCATTACAACCTCTATTTATAT  
TAATCATGCCCATTATCCTAACCTGTACCCCGAGCATATGAAAATAAACTTTACCCGCAATAT  
GTAAAAACCAAGTCTCTTATGCCTTCACAATTAGCATAAATCCCATAGTAATATTCATCCAC  
TCCGGACAAGAAGCAATCATCTCAAACCTGACACTGAATAACCATCCAAACCCTAAAACCTCA  
GTCTAAGCTTCAAATTAGATTACTTTTCAATAATCTTCGTACCAGTGGCCCTATTTCGTACAT  
GGTCAATTATAGAATTCTCTATATGATATATACACGCAGATCCTAACATTAACCGATTCTTTA  
AATATCTACTTATATTTCCTCGTCACGATAATAATTCTAGTAACCGCAAATAATCTATTTACGC  
TATTCATCGGCTGAGAGGGAGTAGGAATCATATCATTTCCTCATTGGATGATGATATGGA  
CGAACAGATGCTAATACGGCTGCCCTACAAGCAGTACTATAACAACCGCATTGGAGATGTTGG  
TTTTATCATGGCCATAGCTTGATTCTTACTCAATACTAATGCATGGGACTTCCAACAAATCTT  
TATAATCGAACATAAAAACCTCAATATTCCACTGGCAGGACTACTTCTAGCAGCTACCGGAA  
AGTCTGCCCAATTTGGACTTCATCCATGACTCCCATCAGCCATAGAAGGCCCCACTCCTGTCT  
CAGCACTACTTCACTCTAGCACAATAGTAGTAGCAGGCGTATTTCTTCTAGTCCGGTTTCACC  
CCTTAATAGAACATAACAAGACAATTCAAACGGTTACCCTATGCTTAGGGGCAATAACAACC

TTGTTTACAGCAATCTGCGCCCTTACCCAAAATGATATCAAAAAAATTATTGCCTTCTCCACC  
TCGAGCCAACTAGGACTAATAATTGTAACAATTGGTATTAATCAGCCTCATCTGGCCTTTCTC  
CATATCTGCACGCACGCATTCTTCAAGGCCATGCTATTTCTATGCTCCGGATCTATTATTCAT  
AGTCTAAACAACGAACAAGATATTCGAAAGATAGGAGGGCTATTTAAAAGTCTACCATTTA  
CCACTACTGCTCTAATCATCGGAACTCTAGCACTTACAGGAATGCCCTTCTTAACAGGATTTT  
ACTCCAAAGACTTAATTATTGAAACCGCCAATACGTCATACACCAACGCCTGAGCCTTACTA  
ACAACCCTTATCGCCACATCCATAACTGCCGCCTACAGTACTCGAATTGTATTTTTTACACTT  
CTAGGACAACCTCGCTATAGTCCCATTATCACCATTAACGAGAATAACCAGTTCCTGACTAA  
CTCTGTCAAACGATTGCTACTAGGAAGTATCTTTGCGGGATTCTTAATCTCTCATAACATTAC  
ACCCACCACTGTCCCAAAATAACCATGCCCTGTCACCTAAAAATGATAGCCCTTACAGTAA  
CAATCCTAGGCTTTATTCTAGCACTAGAACTTAACCTAGCCATACAAAATCTCAAATTTGACT  
ACCCGTTAAGCACGTTCAAATTTTCAAATCAACTAGGATATTTCCCTACTACTCTGCATCGTC  
TCGCACCAATAATAGGTCTATCAATAAGCCAAAAAACAGCATCCATACTGCTAGATGCAATC  
TGACTAGAGAATGTTCTACCAAAGTCCATCTCCTACTTTCAAATAAAAATCCTCAATCACAGT  
CTCCAACCAAAAGGGACTAATTAACCTATACTTTCTCTCCTTTATAATTACACTAATCTTAAG  
TCTCTTTATACTTAATTTCCACGAGTGACTTCCATAATTACCAATACACCAATAAGGAGAGAT  
CATCCAGTAACAATAACTAATCAAGTACCATAACTATATAAAGCTGCAATTCCCATAGCCTC  
TTCATAAAAAATCCTGAATCCCCTGTATCATAAATCACCCAATCTCCTATTCCATTAAACTT  
AAATACTACCTCGGCTTCATCATCCTTTAAAATATAACAAACAGCCAGTAACCTCAGACAACA  
GACCTACAATAAATGCACCTAGTACAGCCTTATTAGAAAGTCAAACCTCAGGATATTGCTCA  
GTGGCTATGGCCGTAGTGTACCCGAACACTACAAGTATACCCCCTAAATAAATTAAAAAGAC  
CATTAAACCCAAAAAAGATCCTCCAAAGCTTAACACAATACCACACCCTACACCCCCACTAA  
CAATCAAGACTAAACCTCCGTAGATAGGAGAGGGCTTAGAAGAAAACCCCGCAAAACTAAC  
TACAAAAACGATACTTAAAATAGATACAATGTATGTTATCATCATTCTTACATGGAATCTAA  
CCATGACCAATGACATGAAAAATCATCGTTGTATTCAACTATAAGAACCCCAATGATCAAC  
ATCCGAAAAACTCATCCATTAGTTAAAATTATCAACAACCTATTTCATTGACCTTCCAACACC  
ATCAAACATTTCAACATGATGGAACCTTGGGTCCCTGTTAGGAGTGTGTCTGATCTTGCAAA  
TCTTAACAGGCTTATTTCTAGCCATACACTATACATCAGATACAGCTACAGCCTTTTCATCAG  
TCGCACACATTTGTGCGAGACGTCAACTATGGTTGATTTATCCGATATATACATGCCAATGGG  
GCCTCTATATTTTTTATCTGCCTATTTATACACGTAGGGCGAGGCTTATACTATGGATCATAC  
CTATTTCCAGAGACATGGAATATCGGAATTATTCTCCTACTTACAGTTATAGCCACAGCATT  
ATAGGATATGTACTACCTTGAGGACAAATATCCTTCTGAGGAGCAACCGTCATTACTAACCT  
ACTATCAGCAATTCCTTACATTGGCACTAATCTAGTGGAGTGAATCTGAGGGGGTTTCTCCG  
TAGATAAAGCAACACTAACCCGATTTTTTGCTTTTCACTTTATCCTTCCATTTATCATCTCAGC  
ACTAGCAATAGTCCATCTATTATTCCTTACGAAACAGGATCTAATAACCCCTCCGGAATTC  
CATCTGACCCAGACAAAATCCCATTTTACCCCTATCATACAATTAAAGACATCCTAGGCGTC  
CTATTTCTTGCTCGCCTTAATAACCCTGGCTTTATTCTCACCAGACCTGTTAGGAGACCCT  
GATAACTATACCCCTGCAAATCCACTAAGTACCCCGCCACATATTAAGCCTGAATGGTACTT  
TCTATTTGCCTACGCTATCCTGCGATCTATCCCTAATAAACTAGGAGGGGTGCTAGCTCTAAT  
CTTCTCTATTCTAATTCTAACTATTATTCCTACTATTACATACATCCAAACAACGAAGCATGAT  
ATTCCGACCTCTAAGTCAATGCTTATTCTGACTCCTAGTAGCAGACCTACTCACACTAACATG  
AATTGGAGGACAGCCAGTAGAACACCCCTTCATTATTATTGGGCAATTGGCCTCTATTCTCT  
ACTTTACAATTCTTCTAGTACTTATACCTATCACTAGCATTATTGAGAATAGCCTCTCAAAAT  
GAAGAGTCTTTGTAGTATATTAATTACTTTGGTCTTGTAACCAAAAACGGAGATTCTCTAC  
TTCTCCCTAAGACTCAAGGAAGGAGCAACAACCCCACTACCAGCACCCAAAGCTGGTGTCT  
ACTTAACTATCCCCTG

>SRR6109210 AssemblyGraph Reorganized

ATACTATAAATCCACCTCTCATTTTATTCACTTCATACATGCTATTACACACTCTGTGCCATC  
ATAGTATGTTTTATACATCCTCCCTTCTTTACACCCTATGTATATCGTACATTAATGGTGTA  
CCCCCCCCCTCCCCCTATGTATATCGTGCATTAATGGCGTGCCCCATGCATATAAGCATGTAC  
ATACTGTGCTTGGCTTTACATGAGGATACTCATTACAAGAACTTATTCAAGCGATAGTCTAT



GAGCATGTATTTCACTTAGTCCAAGAGCTTGATCACCAAGCCTCGAGAAACCAGCAATCCTT  
GCGAGTACGTGTACCTCTTCTCGCTCCGGGGCCATAATTTGTGGGGGTTTCTATACTGAAACT  
ATACCTGGCATCTGGTTCTTACCTCAGGGCCATGTTAGCGTCAACTCAATCCTACTAACCCTT  
CAAATGGGACATCTCGATGGACTAATGACTAATCAGCCCATGATCACACATAACTGTGGTGT  
CATGCATTTGGTATTTTTTAATTTTAGGGGGGGAACCTTGCTATGACTCAGCTATGACCGTAAA  
GGTCTCGTCGCAGTCAAATCAGCTGTAGCTGGGCTTATTCATCTTTCGAGGCTCCTCATGGAT  
ACCCATAAGGTGCAATTCAGTCAATGGTCACAGGACATAACACTATAGATCACCCGGACTG  
GCGTTACGTGTACGTACGTGTACGTACGTGTACGTACGTGTACGCACGTGTACGTACGTGTA  
CGTACGTGTACGTACGTGTACGCACGTGTACGTACGTGTACGCACCCGGACTGGCGTTACGT  
GTACGTACGTGTACGTACGTGTACGTACGTGTACGCACGTGTACGTACGTGTACGTACGTGT  
ACGTACGTGTACGCACGTGTACGTACGTGTACGCACGTGTACGTACGTGTACGCACGTGTAC  
GCACGTGTACGCACGTGTACGTACGTGTACGTACGTGTACGTACGTGTACGTACGTGTACGC  
ACGTGTACGCACGTGTACGCACGTGTACGCACGTGTACGCACGTGTACGCACGTGTACGTAC  
GTGTACGCGTACGTATTTTAGATACTAAGTTAGCTTAGACAAACCCCCCTTACCCCCGTAA  
CTTCAAGAAGCTTACATATACTTATGGATGTCCTGCCAAACCCCAAAAACAAGACTAAATAT  
ATGCGCAAACATGAAGTCACTTACACCTAAACCCATATAATTAAGCTAACCCCCCAGCCAAT  
GTTGCAACAACACTACGGACATGGGACTCTAAATTTTAATTTATCTATAGATATTTTTCTTTTAC  
TGTGTCTCCCCAGCATTGATTTTTTAATTATCATTATTCACACCACCAATTTCCATTGAGCTA  
TTTCACATGAGTTCCAAATCAATTATGTTTCATGTAGCTTAACGAATAAAGCAAGGTACTGAA  
AATGCCTAGATGGGTCACGCTACCCCATAGACATAAAGGTTTGGTCCTAGCCTTCCTATTAG  
CCATTAACAAGATTACACATGTAAGTCTCCACGCTCCAGTGAAAATGCCCTTAAGTCCTCT  
TAGACGACCTAAAGGAGCGGGTATCAAGCACACCTTATGGTAGCTCACAACGCCTTGCTTAG  
CCACACCCCCACGGGAAACAGCAGTGATAAAAATTAAGCTATGAACGAAAGTTCGACTAAG  
CTATGTTAATACTAGGGTTGGTAAATCTCGTGCCAGCCACCGCGGTCATACGATTAACCTCGA  
GTTAATAGGCCTACGGCGTAAAGCGTGTAAGAAGAAAAATCTCCTCTACTAAAGTTAAAGT  
ATGATTAAGCTGTAAAAAGCTACCATTAATACTAAAAATAAACTACGAAAGTGACTTTAAAAAT  
TTCTGATTACACGATAGCTAGGGCCCCAACTGGGATTAGATACCCCACTATGCCTAGCTCTA  
AACATAGATATTTTACTAAACAAAACCTATTCGCCAGAGAACTACTAGCAACAGCTTAAAACT  
CAAAGGACTTGGCGGTGCTTTATATCCCCCTAGAGGAGCCTGTTCTGTAATCGATAAACCCC  
GATAGACCTCACCATCCCTTGCTAATTCAGTTTATATACCGCCATCTTCAGCAAACCCCTTAA  
AGGAAAAAAGTAAGCATAACTACCCTACATAAAAAAGTTAGGTCAAGGTGTAACCTATGG  
GCTGGGAAGAAATGGGCTACATTTTCTATTCAAGAACAACCTTCTACGAAAACCTTTTATGAAA  
CTAAAAGCTAAAGGCGGATTTAGTAGTAAATTAAGAATAGAGAGCTTAATTGAACAGGGCA  
ATGAAGCACGCACACACCGCCCGTCACCTCCTCGAGTGATATAATTTAATTATAACCTATT  
TAACTAAGCAAAGCATAAGAGGAGACAAGTCGTAACAAGGTAAGCATACTGGAAAGTGTG  
CTTGGATGAGCCAAAGTGTAGCTTAAACAAAGCGTCTGGCTTACATCCAGAAGATTTTCTTA  
ATATATGACTACTTTGAACCCAAAGCTAGCCCAAGCAACAATGACTAGTAAAACCATTAATGA  
AACATTCAAACAAAACATTTAGTAGCATGACTAGAGTATAGGAGATAGAAATTTTTAACTGG  
AGCTATAGAGAGAGTACCGCAAGGGAATGATGAAAGATTACCTAAAGTGATAAACAGCAAA  
GATTGCCCCCTTCTACCTTTTGTATAATGAGTTAGCTAGAAATAACTTAACAAAGAGAACTTA  
AGCTAAGTCCCCGAAACCAGACGAGCTACCTATGAACAATCCACTGGGATGAACTCATCTA  
TGTTGCAAAATAGTGAGAAGATCCATAGGTAGAGGTGAAAGGCCTAACGAGCCTGGTGATA  
GCTGGTTGCCGAGAATAGAATTTTAGTTTCGACTTTAAACCTGCCTACAAAACCTAATAATTCT  
AATGCAGATTTAAAAATATATTCTAAAAAGGTACAGCTTTTATAGAGTTAAGGATACAGCCTTA  
CTTAGAGAGTAAATATTTATATAAGCCATAGTAGGCCTAGAGGCAGCCATCAATTAAGAAA  
GCGTTAAAGCTCAACATCTCTATTAACCTAATAACCAAGAATATTTAATCAACTCCTAATGTAT  
TACTGGGTCAATCTATTTAAATATAGAAGTGATAATGCTAATATGAGTAACAAGAAATATTT  
CTCCCATGCATAAGCTTATAACAGCAACGGATAACCACTGATAGTTAACAACAACATAGAA  
ATAACCTAATGATAAAACACCTATTAATCAATTGTTAGTCCAACACAGGCATGCAATCAGG  
GAAAGATTAAAAGAAGTGAAAGGAACTCGGCAAATACAAACCCCGCCTGTTTACCAAAAAC  
ATCACCTCCAGCATTTCCAGTATTGGAGGCACTGCCTGCCCGGTGACATCAGTTAAACGGCC

GCGGTATTCTGACCGTGCAAAGGTAGCATAATCATTTGTTCTCTAAATAAGGACTTGTATGA  
ATGGCCACACGAGGGTTTAACTGTCTCTTACTTCCAATCAGTGAAATTGACCTCCCCGTGAA  
GAGGCGGGGATAAGACAATAAGACGAGAAGACCCTATGGAGCTTTAATTAACATAATTCAAA  
AAGAACTACTAACGACCCAACAGGAATAATATATCTCTTTTATGAATTAGCAATTTAGGTT  
GGGGCGACCTCGGAGGACAAAATAGCCTCCGAGTGATTATAAATCTAGACTTACCAGTCAA  
AATGCTTAATCACTTATTGATCCAAAAATTCTTTTGATCAACGGAACAAGTTACCCTAGGGA  
TAACAGCGCAATCCTATCCGAGAGTCCATATCGACAATAGGGTTTACGACCTCGATGTTGGA  
TCAGGACATCCTAATGGTGCAGCAGCTATTAAAGGTTTCGTTTGTTCAACGATTAAAGTCCTA  
CGTGATCTGAGTTCAGACCGGAGCAATCCAGGTCGGTTTCTATCTATTCAAATAATTTCTCCC  
AGTACGAAAGGACAAGAGAAATAAGGCCTACTTCTCTGAAGCGCCTTAAGACCAATAGATG  
AATTTATCTAAATCTAGTAAATCTAACTCCAATATTGCCCAAGAGACAGGGCTTTGTTAGGG  
TGGCAGAGCCCGTAATTGTGCAAACTTAACTCTTGTGTCCAGAGGTTCAATTCCTCTCC  
CTAGCATATGTTTATAATTAACATCTTCTCACTAATTGTACCTATTCTTCTTGCTGTAGCCTTT  
CTGACTCTAGTAGAACGAAAAGTACTAGGCTACATACAGCTTCGAAAAGGCCCAAATATTGT  
AGGTCCATATGGTCTCCTACAACCAATCGCAGATGCCGTAAAACCTTTTACTAAAGAACCTT  
TACGACCACTTACGTCAATCCATAACTATATTTATTATAGCCCCTATTCTAGCCTTAACACTAG  
CTCTGACCATGTGAGTCCCCTTACCAATACCGCACCCCCTTATTAACATAAACCTAGGAGTA  
CTATTCATACTAGCTATATCAAGTCTAGCTGTATACTCTATTCTCTGATCTGGATGAGCCTCA  
AACTCAAAATATGCCCTAATTGGAGCCCTACGAGCCGTAGCTCAAACGATCTCATATGAAGT  
CACACTAGCCATTATCCTTTTATCCGTTCTACTAATAAATGGCTCATTTACGCTATCCACGCT  
AATCATTACCCAAGAACATCTTTGATTAATCTTCCCTGCATGACCACTAGCTATAATATGATT  
TATTTCTACCCTAGCAGAAACAAATCGAGCCCCCTTTGACCTAACAGAAGGAGAATCAGAAC  
TAGTCTCTGGGTTTAAATGTGCAATATGCAGCAGGTCCATTTGCCCTGTTCTTCCTAGCAGAAT  
ATGCCAACATCATCATAATAAATGCTCTTACAACCTATTCTATTCTTCGGAGCATTTTCACAGCC  
CCTACATACCAGAATTATACATTGTTAATTTTACCGTAAAACTTTACTCCTCACAATCTCTT  
TTCTATGAATCCGAGCATCATATCCTCGATTCCGATACGACCAACTAATACACCTACTATGA  
AAAAACTTTCTACCTCTCACACTAGCTCTATGTATATGACATGTAACCTCTACCTATTATTACA  
GCAAGCATTCCACCTCAAACGTAAGAAATATGTCTGACAAAAGAATTACTTTGATAGAGTAA  
GCCATAGGGGTTTAAAGTCCCCTTATTTCTAGAATCATAGGAATCGAACCTAATCTTAAGAAC  
TCAAAAATCTTCGTGCTACCTAACTACACCATATCCTAAAGTAAGGTCAGCTAAATAAGCTA  
TCGGGCCCATACCCCGAAAATGTTGGTTTATCCCCTTCCCATACTAATAAAACCAGCCATCCT  
TATTACCATTACATCCACCGTTGTCTTAGGAACTATAATTGTTCTATTTAGCTCCCCTGATT  
CATAATCTGAGTTGGCTTTGAAATAAATACTAGCCATTATCCCAATTCTAATAAAAAAAT  
ATAACCCACGAGCCATAGAAGCTTCCACAAAATATTTTCTAACACAAGCTACAGCATCCATG  
CTTCTAATGCTAAGCATCATCAATCTACTATGCTCAGGACACTGGACAGTTTCAACAATT  
CCCAATCCAGTAGCATCTACCATAATTACTATTGCTCTAACAATAAACTTGGCCTATCACC  
ATTTCACTTTTGAGTCCCAGAAGTTACACAAGGCATTTCCCTTATCTTCAGGAATAATCCTATT  
AACATGACAAAAAATTGCACCTTTATCCATTCTATACCAAATTTACCATCCGTTAACTCAA  
ATCTCTTACTAATAATAGCTATCACATCCATACTGGTAGGAGGCTGAGGAGGATTAAATCAA  
ACCCAACTCCGAAAAATCTTGGCATACTCCTCAATTACCCATATAGGCTGAATGGCTGCTAT  
TATAGTATATAATCCTACCCTAGCAATTCTTAACCTAACAATTTACATCATAATAACTCTAGG  
AACATTTATACTATTTCATACATAGCTCATCTACAACAACACTATCACTATCTTATACATGAAA  
TAAATTCCCATTAAATAGCCCCACTAATCTTAATACTTATACTATCACTAGGAGGCTCCCTCC  
TCTCTCAGGCTTTATCCCCAAATGAATAATTATTCAAGAATTAACAAAAAACGACATAATTA  
TTATACCTACACTTATAGCCATTACAGCCCTACTAAACCTATATTTTTTACACACGCCTAACAT  
ATACTACAGCACTAACTATATTTCCCGCAACAAATAATATAAAAAATAAAATGACAATTCGAA  
ACCACAAAAAAGACAACCTCTCCTAGCCCCCTCTAATCGTGACATCAACTATACTACTACCACT  
AACCCCAATACTAGCAGCTCTTGATTAGAGATTTAGGCTAAACAGACCAAGGGCCTTCAAAG  
CCTCAAGTAAGTGAAAATCCACTTAATCTCTGCAATATTTAAGGACTGCAAGAATCTACCTC  
ACATCAACTGAACGCAAAACAATCGCTTTAATTAAGCTAAGCCCTTCTAGATCGGTGGGCTT  
TTACCCCAACAAAACCTTTAGTTAACAGCTAAAAACCCTAGACAACCTGGCTTCAATCTACTTCT

CCCGCCGCGTAGGAAAAAAGGCGGGAGAAGCCCCGGCAGAATTGAAGCTGCTTCTTTGAA  
TTTGCAATTCAATATGATTACTCACCACAGAGCCTGGTAAAAAGAGGACTTAACCCCCATTCT  
TTAGATTTACAGTCTAGTGCTTTTATCAGCCATTTTACCTATGTTTCATTAACCGATGACTGTTT  
TCCACCAACCACAAAGATATTGGCACTCTTTATCTTCTGTTTGGCGCATGAGCTGGTATAACG  
GGCACTGCTCTTAGCCTTCTAATCCGTGCTGAATTAGGTCAGCCTGGAGCTCTGTTAGGAGA  
TGACCAAATTTACAATGTAGTTGTAAGTGGCCACGCATTTCGTAATAATCTTCTTTATAGTTAT  
GCCTATTATGATCGGAGGCTTTGGAAATTGACTAGTACCTTTGATAATTGGTGCGCCTGATAT  
AGCATTTCCCGAATAAAACAATATGAGTTTCTGATTACTACCTCCATCCTTTCTTCTCCTTCTG  
GCTTCTTCCATAGTAGAAGCAGGCGCAGGGACTGGATGAACTGTATACCCTCCTCTAGCAGG  
TAACTTAGCCCATGCAGGAGCATCAGTAGACCTAACAACTCTTTTCTCTACATCTGGCAGGGG  
TTTCTTCTATTTTAGGGGCTATTAACCTTTATTACCACTATCATCAACATGAAACCCCTGCAA  
TATCTCAATATCAAACCTCCCTATTCGTGTGATCAGTACTTATCACAGCAGTACTTCTCCTTC  
TATCTTTACCAGTCTTAGCAGCTGGAATTACTATACTACTTACAGATCGAAATCTCAATACTA  
CTTTCTTCGACCCGGCCGGAGGAGGGGATCCCATTTCTATATCAACATCTATTTTGATTCTTTG  
GCCATCCTGAAGTCTATATTCTAATCCTCCCTGGGTTTGGAAATAATTCACACATTGTCACAT  
ACTATTCAGGAAAGAAAGAGCCCTTTGGTTATATGGGAATAGTGTGGGCAATAATGTCAATT  
GGATTCTTAGGATTTATTGTATGGGCCCATCATATATTTACTGTAGGCATAGATGTTGATACA  
CGAGCCTATTTTACCTCGGCCACTATAATTATTGCAATCCCGACAGGAGTTAAAGTATTTCAG  
CTGACTAGCTACCCTGCATGGAGGAAATATTAAGTGATCCCCTGCCATAATGTGAGCCCTAG  
GTTTCATTTTTCTATTTACAGTAGGGGGTCTTACAGGCATTGTTCTAGCTAACTCATCTCTGG  
ACATTGTCTCCATGACACATACTACGTAGTAGCACACTTCCACTATGTACTATCAATAGGG  
GCCGTGTTTCGCTATTATAGGAGGCTTCGTCCATTGATTCCCATTTTTCGGGCTATACACTT  
AATAATACATGAGCAAAAATTCACTTCGTAATTATATTTGTTGGAGTCAATATAACATTCTTC  
CCCCAGCACTTCCTAGGTCTATCAGGTATGCCTCGACGATATTCTGATTATCCAGACGCCTAT  
ACAGCATGAAACACAGTGTCTTCAATGGGTTCATTCAATTCCTAACAGCAGTTATGTTAAT  
AATTTTCATAATTTGAGAAGCCTTCGCATCTAAACGAGAAGTGGCAGTGATTGAGCTTACTA  
CAACTAATATTGAATGGCTCCACGGATGCCCTCCCCCATACCATAATTTCGAAGAGCCCGCC  
CACGTCACTACTGAAATAAGAAAGGAAGGAATCGAACCCTCTAGAATTGGTTTCAAGCCAGC  
ATCATAACCACTATGTCTCTCTCAATAAAGAGGTATTAGTAAAAATTACATAACTTTGTCAA  
AGTTGAATTATAGGTGAAAATCCTTTATATCTCTATGGCGCATCCCTTTCAAACAGGCCTTCA  
AGATGCAACTTCCCCCATCATGGAAGAACTCCTACACTTCCATGATCATACTAATAATTG  
TATTCTTAATTAGTTCCTTAGTTCCTATATCATTTCGAATTATTAATACTACTAAATTAACACA  
TACAAATACAATAGACGCACAAGAAGTGGAGACAGTATGAACTATTCTACCAGCTATCATCT  
TAATTATAATTGCACTTCCATCACTACGAATTCTTTATATGATAGATGAAATTAATAACCCAT  
CATTAACTGTAAAGACTATGGGGCATCAATGATACTGAAGCTATGAGTATACAGATTATGAA  
GACTTGAGCTTCGATTCTTATATAACCCCAACACAAGAATTAAGCCCGGAGAGCTGCGATT  
ACTAGAGGTAGATAATCGAGTAGTACTACCCATAGAAATAACAATTCGCATATTAATTTCT  
CAGAAGATGTGCTACATTCGTGAGCTGTCCCATCTCTAGGACTAAAACTGATGCAATCCCC  
GGGCGATTAAATCAAACAACCTCTTATGGCCATGCGACCAGGACTATATTATGGCCAATGCTC  
AGAGATTTGCGGTTCTAATCATAGCTTTATACCCATTGTACTTGAAATAGTTCCGCTGTCTTA  
CTTTGAAAAATGATCCGCTTCAATACTATAAAAATCATTAAAGAAGCTTTATAGCGTTAACTTT  
TAAGTTAAAGACTGAGAGTGCAAGTCTCTCCTTAATGGAAATGCCACAATTAGACACATCCA  
CATGATTTATTACAATCCTATCCATGATCTTAACACTATTTATTATATTTTCAGTTAAAAGTCT  
CAAAACACAACCTATCCTGAGTTTCCTGAATTA AAAACAACCCCACTATCAAAAAACCTATG  
CCTTGAGAAGAAAAATGAACGAAAATCTGTTTCGCCTCTTTTACTACCCCAATGATAATAGGA  
GTACCAATTGTGGTTCTGATTATTATTTTCCCAAGTATCTTATTTCCCTCACCTAATCGATTAA  
TCAATAACCGCCTAGCTACTGTCCAACAATGATTAATTCAATTAGTATCTAAGCATATACTGT  
CTATTCACAATTATAAAGGACAAACCTGAGCGCTAATACTAATGTCATTAATTTTATTTATTG  
GCTCAACTAACCTTTTAGGCCTATTACCACATTCATTCACACCTACTACACAACCTATCAATAA  
ATTTAGGAATGGCCATTCCTCTGTGAGCAGGTACAGTAGTTATAGGATTTTCGACACAAAACCT  
AAGGCATCTCTGGCCCACTTTCTACCCCAAGGAACACCTCTTCCTCTGATCCCAATGTTAGTA

ATTATCGAGACAATTAGTCTGTTTATTCAACCTGTGGCCCTAGCTGTACGACTGACCGCTAAT  
ATTACTGCAGGCCATCTACTTATTCATTTAATCGGAGGGGCTACCCTAGTTTAAATAAACATT  
AACCTGTAAACAGCCCTAATTACCTTTATTATTCTTATTCTACTTACTATTCTCGAATTAGCTG  
TAGCTCTTATCCAAGCCTATGTTTTCCACCCTACTAGTTAGTCTATACTTACATGATAATACCT  
AATGATCCACCAAACACATGCATATCATATAGTTAATCCAAGCCCATGGCCACTTACAGGAG  
CTCTCTCGGCTCTTCTTATAACATCAGGACTAATTATATGATTTCACTTTAACTCGGTATACTT  
ACTAATACTAGGCCTCACCACCAACATACTTACCATGTACCAATGATGACGAGATATCGTCC  
GGGAAAGTACCTTCCAAGGCCATCACACCCCAATCGTCCAAAAAGGACTACGATATGGAAT  
AGTCTTATTTATTGTATCAGAAGTATTTTTCTTCGCGGGATTCTTTTGGGCCTTCTACCACTCA  
AGCCTAGCACCTACTCCTGAATTAGGAGCATGTTGACCACCTACAGGTATCATCCCCTTAAA  
TCCGCTAGAAGTTCCTACTTAAACACCTCTGTACTTCTAGCATCTGGGGTATCTATCACTTG  
AGCTCATCATAGTCTAATAGAAGGAGACCGCAAACATATGCTCCAAGCCCTATTTATTACTA  
TTTCACTAGGAGTTTATTTTACACTTCTACAAGCCTCAGAATACTATGAGACATCCTTTACTA  
TTTCAGATGGAGTGTATGGTTCAACCTTCTTTATAGCAACTGGATTTTCATGGGCTTCATGTAA  
TTATTGGTTCAACTTTTCTTACTGTGTGTTTTCTACGACAACCTGCACTTTCACTTTACATCCAA  
CCATCACTTTGGCTTTGAAGCGGCAGCATGATACTGACACTTCGTAGACGTTGTATGGCTTTT  
CCTTTATGTTTCTATTTACTGATGAGGATCCTACTTCTTTAGTATTAAGTACGATTGACCT  
CCAATCAATAGGCTCTGGTACAAGCCAGAAAGAAGTAATAAACCTAATTCTAGCACTTCTAA  
CCAACGTATTATTAGCCTCTCTGCTCGTTCTTATTGCATTCTGACTGCCACAACCTAAATATCT  
ATGCAGAAAAAGTAAGTCCTTATGAATGTGGATTGTATCCTATAGGATCAGCACGCCTTCCT  
TTCTCTATAAAATTTTTTCTAGTAGCTATTACATTCTTTTATTTCGACTTAGAAATTGCTCTAC  
TCCTCCCCTTCCTTGAGCATTACAGACTAACAACTTAATAACTATACTTATTATAGCTCTAT  
TACTCATTTCCCTATTAGCCGCAAGCCTAGCTTATGAGTGAACCGAAAAGGGGCTAGAATGG  
GCCGAATATGATAATTAGTTTAACTAAAATAAGTGATTTCGACTCACTAGATTATGACTAA  
CATCATAATTATCAAATGTCTGTGGTCTATATTAATCTCTTTCTAGCCTTTACTATATCCTTAA  
TAGGGCTACTCATCTATCGATCCCATTAAATATCCTCCCTATTATGCTTAGAAGGCATGATGC  
TGTCACTATTTGTTATACTAGCAGTAACAATCCTAAGTAACCACTTCACACTAGCCAGTATG  
ACTCCAATCATTCTATTAGTATTTCGCTGCCTGTGAAGCAGCGTTGGGGCTTTCTCTGCTAGTA  
ATAGTCTCTAATACCTATGGAACCTGACTACGTACAAAATCTTAACCTCCTACAATGCTAAAA  
ATTATCCTCCCTACCATAATACTAGTACCCCTTACATGAATATCAAAGCCTAACATAATCTGA  
ATTAATACAACAACCTATAGTCTACTCATCAGCCTTATTAGTCTGACATATCTCAATCAACTC  
AGTGATAATAGTCTAACTTCTCATTAACATTCTTTACCGACTCCCTATCAGCCCCCTGTTA  
GTTCTCACAACATGACTACTGCCCTTAATACTTATAGCTAGTCAATTTACCTGTCAAAAAGAG  
ACCTGACCCGGAAAAAATTATATATCACAATACTAATTCTCCTGCAACTATTCTTAATTATA  
ACATTTTCTGCTACTGAGTTAATCATATTCTATATTTTATTTGAAGCTACCCTGGTACCGACTT  
TAGTTATCATTACTCGATGAGGAAACCAAACAGAACGACTAAACGCGGGCCTCTATTTTTTA  
TTCTACACCTTAGTAGGATCCTTGCCCTTACTAGTTGCACTGTTATATGCCCAAAACAGCTTA  
GGATCACTAAATTTTCTCATAGTACAGTACTGAACTCAGCCCTTGCCAAATTCCTGATCTAAC  
ATTTTCATGTGGCTGGCATGTATAATAGCATTTCATAGTAAAAATACCGCTATATGGCTTACA  
CCTATGACTACCTAAAGCACATGTAGAAGCTCCTATTGCAGGATCCATAGTACTTGCTGCAG  
TACTTCTAAAACCTAGGGGGATACGGTATAATGCGGATTACAACAATACTCAACCCTCTAACA  
AATTTTATAGCCTACCCCTTCATAATGCTCTCACTATGAGGAATAATCATAACAAGTTCTATT  
TGTTTACGCCAGACAGACCTAAAGTCCCTAATTGCATACTCCTCTGTAGTCACATAGCCCTA  
GTCATTGTAGCAATTCTAATCCAATCCCCATGAAGCTACATAGGAGCTACTGCTCTAATAAT  
CGCCCATGGGTAAACATCTTCTATGCTATTCTGTCTTGCAAACCTCTAACTACGAGCGAACCCA  
TAGCCGAACATAATTCTCGCACGGGGCTTGCAAACGCTTCTTCCACTTATAGCAGCTTGAT  
GACTATTAGCAGGCCTAACTAACTTAGCTCTTCTCCTACAATTAATCTGATTGGGGAACTGT  
TTGTAGTGATAGCCACATTTTCATGATCCAATATTACCATTCTCTTAATAGGAGTTAACATTA  
CCATTACTGCTCTCTACTCTCTATATATACTAATTTCTACACAGCGAGGCAAGTATACAGACC  
ACATCAAAAAATATTAAGCCATCTTATACACGAGAAAATGCCTTAATAGCCTTACATTTACTA  
CCCCTTTTACTTCTATCTCTTAACCCTAAAGTAGTTCTAGGCTTTATTTACTGTAAATATAGTT

TAACAAAAACATTAGATTGTGAATCTAGTAATAAAAGCTTAAATCTTTTTATTTACCGAAAA  
AGCATGCAAGAACTGCTAATTCATGCACCCATGCATAAAATCATGGCTTTTTCAACTTTTAG  
GGGATAGAAGTAATCCATTGGTCTTAGGAGCCAAAAAATTGGTGCAACTCCAAATAAAAGT  
AATTAACCTACTTACCTCCTTCACCATTACAACCCTATTTATATTAATCATGCCATTATCCT  
AACCTGTACCCCAGCATATGAAAATAAACTTTACCCGCAATATGTAAAAACCACAGTCTCTT  
ATGCCTTCACAATTAGCATAATTCCCATAGTAATATTCATCCACTCCGGACAAGAAGCAATC  
ATCTCAAACCTGACACTGAATAACCATCCAAACCCTAAAACCTCAGTCTAAGCTTCAAATTAGA  
TTACTTTTTCAATAATCTTCGTACCAGTGGCCCTATTCGTACATGGTCAATTATAGAATTCTC  
TATATGATATATACACGCAGATCCTAACATTAACCGATTCTTTAAATATCTACTTATATTCCCT  
CGTCACGATAATAATTCTAGTAACCGCAAATAATCTATTTTCAGCTATTTATCGGCTGAGAGG  
GAGTAGGAATCATATCATTCTCCTCATTGGATGATGATATGGACGAACAGATGCTAATACG  
GCTGCCCTACAAGCAGTACTATAACAACCGCATTGGAGATGTTGGTTTTATCATGGCCATAGC  
TTGATTCTTACTCAATACAAATGCATGGGACTTCCAACAAATCTTTATAATCGAGCATAAAA  
ACCTCAATATTCCACTGGCAGGACTACTTCTAGCAGCTACCGGAAAGTCTGCCCAATTTGGA  
CTTCACCCATGACTCCCATCAGCCATAGAAGGCCCCACTCCTGTCTCAGCACTACTTCACTCT  
AGCACAATAGTAGTAGCAGGCGTATTTCTTCTAGTCCGATTTACCCCCTTAATAGAACATAA  
CAAGACAATTCAAACGGTTACCCTATGCTTAGGGGCAATAACAACCTTGTTTACAGCAATCT  
GCGCCCTTACCCAAAATGATATCAAAAAAATTATTGCCTTCTCCACCTCGAGCCAACTAGGA  
CTAATAATTGTAACAATTGGTATTAATCAGCCTCATCTGGCCTTTCTCCATATCTGCACGCAC  
GCATTCTTCAAGGCCGTGCTATTTCTATGCTCCGGATCTATTATTCATAGTCTAAACAACGAA  
CAAGATATTTCGAAAGATAGGAGGGGCTATTTAAAAGTCTACCATTTACCACTACTGCTCTAAT  
CATCGGAACCTCTAGCACTTACAGGAATGCCCTTCTTAACAGGATTTTACTCCAAGACTTAA  
TTATTGAAACCGCCAATACGTCATACACCAACGCCTGAGCCTTACTAACAACCCCTTATCGCC  
ACATCCATAACTGCCGCCTACAGTACTCGAATTGTATTTTTTACACTTCTAGGACAACCTCGC  
TATAGTCCCATTATCACCATTAAACGAGAATAACCAGTTCCTGACTAACTCTGTCAAACGATT  
GCTACTAGGAAGTATCTTTGCGGGATTCCCTAATCTCTCATAACATTACACCCACCACTGTCCC  
ACAAATAACCATGCCCTGTACCTAAAAATGATAGCCCTTACAGTAACAATCCTAGGCTTTA  
TTCTAGCACTAGAACTTAACCTAGCCATACAAAATCTCAAATTTGACTACCCTTTAAGCAGC  
TTCAAATTTTCAAATCAACTAGGATATTTCCCTACTACTCTGCATCGTCTCGCACCAATAATA  
GGTCTATCAATAAGCCAAAAAACAGCATCCATACTGCTAGATGCAATCTGACTAGAGAATGT  
TCTACCAAAGTCCATCTCCTACTTTCAAATAAAATCCTCAATCACAGTCTCCAACCAAAAGG  
GACTAATTAACCTATACTTTCTCTCCTTTATAATTACACTAGTCTTAAGTCTCTTTATACTTAA  
TTTCCACGAGTGACTTCCATAATTACCAATACACCAATAAGGAGAGATCATCCAGTAACAAT  
AACTAATCAAGTACCATAACTATATAAAGCTGCAATTCCCATAGCCTCTTCACTAAAAAATC  
CTGAATCCCCTGTGTCATAAATCACCAATCTCCTATTCCATTAACTTAAATACTACCTCGG  
CTTCATCATCCTTTAAATATAACAAACAGCCAGTAACCTCAGACAACAGACCTACAATAAAT  
GCACCTAGTACAGCCTTATTAGAAAGTCAAACCTCAGGATATTGCTCAGTGGCTATGGCCGT  
AGTGTACCCGAACACTACAAGTATACCCCTAAATAAAATTAAGACCATTAACCCAAA  
AAAGATCCTCCAAAGCTTAACACAATACCACACCCTACACCCCCACTAACAATCAAGACTAA  
ACCTCCGTAGATAGGAGAGGGCTTAGAAGAAAACCCCGCAAACTAACTACAAAAACGATA  
CTTAAATAGATACAATGTATGTTATCATCATTCTTACATGGAATCTAACCATGACCAATGA  
CATGAAAAATCATCGTTGTATTTCAACTATAAGAACCCCAATGATCAACATCCGAAAAACTC  
ATCCATTAGTTAAAATTATCAACAACCTCATTCAATTGACCTTCCAACACCATCAAACATTTCAA  
CATGATGAACTTTGGGTCCCTGTTAGGAGTGTGTCTGATCTTGCAAATCTTAACAGGCTTAT  
TTCTAGCCATACACTATACATCAGATACAGCTACAGCCTTTTCATCAGTCGCACACATTTGTC  
GAGACGTCAACTATGGTTGATTTATCCGATATATACATGCCAATGGGGCCTCTATATTTTTTA  
TCTGCCTATTTATACACGTAGGGCGAGGCTTATACTATGGATCATACCTATTTCCAGAGACAT  
GGAATATCGGAATTATTCTCCTACTTACAGTTATAGCCACAGCATTATAGGGGTATGTACTA  
CCTTGAGGACAAATATCCTTCTGAGGAGCAACCGTCATTACTAACCTACTATCAGCAATTCC  
TTACATTGGCACTAATCTAGTGGAGTGAGTCTGAGGGGGTTTCTCCGTAGATAAAGCAACAC  
TAACCCGATTTTTTGCTTTTCACTTTATCCTTCCATTTATCATCTCAGCACTAGCAATAGTCCA

TCTATTATTCCTTCACGAAACAGGATCTAATAACCCCTCCGGAATTCCATCTGACCCAGACA  
AAATCCCATTTTACCCCTATCATACAATTAAGACATCCTAGGCGTCCTATTTCTTGTCTCG  
CCTTAATAACCCTGGCTTTATTCTCACCAGACCTGTTAGGAGACCCTGATAACTATACCCCTG  
CAAATCCACTAAGTACCCCGCCACATATTAAGCCTGAATGGTACTTTCTATTTGCCTACGCTA  
TCCTGCGATCTATTCCTAATAAACTAGGAGGGGTGCTAGCTCTAATCTTCTCTATTCTAATTC  
TAACTATTATTCCACTATTACATACATCCAAACAACGAAGCATGATATTCCGACCTCTAAGT  
CAATGCTTATTCTGACTCCTAGTAGCAGACCTACTCACACTAACATGAATTGGAGGACAGCC  
AGTAGAACACCCCTTCATTATTATTGGGCAATTGGCCTCTATTCTCTACTTTACAATTCTTCT  
AGTACTTATACCTATCACTAGCATTATTGAGAATAGCCTCTCAAAATGAAGAGTCTTTGTAG  
TATATTAATTACTTTGGTCTTGTAACCAAAAACGGAGATTCCTCTACTTCTCCCTAAGACTC  
AAGGAAGGAGCAACAACCCCACTACCAGCACCCAAAGCTGGTGTCTACTTAACTATCCCC  
TG

>SRR6109211 (circular) ReOrganized

ATACTATAAATCCACCTCTCATTTTATTCACTTCATACATGCTATTACACACTCTGTGCCATC  
ATAGTATGTTTTATACATCCTCCCTTCTTTACACCCTATGTATATCGTACATTAATGGTGTA  
CCCCCCCCCTCCCCCTATGTATATCGTGCATTAATGGCGTGCCCCATGCATATAAGCATGTAC  
ATACTGTGCTTGCTTTACATGAGGATACTCATTACAAGAACTTATTTCAAGCGATAGTCTAT  
GAGCATGTATTTCACTTAGTCCAAGAGCTTGATCACCAAGCCTCGAGAAACCAGCAATCCTT  
GCGAGTACGTGTACCTCTTCTCGCTCCGGGCCATAAATTTGTGGGGGTTTCTATACTGAAACT  
ATACCTGGCATCTGGTTCTTACCTCAGGGCCATGTTAGCGTCAACTCAATCCTACTAACCCTT  
CAAATGGGACATCTCGATGGACTAATGACTAATCAGCCCATGATCACACATAACTGTGGTGT  
CATGCATTTGGTATTTTTTAATTTTAGGGGGGGAACCTTGCTATGACTCAGCTATGACCGTAAA  
GGTCTCGTCGCAGTCAAATCAGCTGTAGCTGGGCTTATTCATCTTTCGAGGCTCCTCATGGAT  
ACCCATAAGGTGCAATTCAGTCAATGGTCACAGGACATAACACTATAGATCACCCGGACTG  
GCGTTACGTGTACGTACGTGTACGTACGTGTACGTACGTGTACGCACGTGTACGTACGTGTA  
CGCACGTGTACGTACGTGTACGCACGTGTACGCACGTGTACGCACGTGTACGCACGTGTACG  
CACGTGTACGTACGTGTACGCGTACGTATTTTAGATACTAAGTTAGCTTAGACAAAACCCCC  
TTACCCCCCGTAACTTCAAGAAGCTTACATATACTTATGGATGTCTTGCCAAACCCCAAAAA  
CAAGACTAAATATATGCGCAAACATGAAGTCACTTACACCTAAACCCATATAATTAAGCTAA  
CCCCCAGCCAATGTTGCAACAACTACGGACATGGGACTCTAAATTTTAATTTATCTATAGA  
TATTTTCTTTTACTGTGTCTCCCCAGCATTGATTTTTTAATTATCATTATTCCACACCACAA  
TTTCCATTGAGCTATTTACATGAGTTCCAAATCAATTATGTTTCATGTAGCTTAACGAATAAA  
GCAAGGTACTGAAAATGCCTAGATGGGTACGCTACCCCATAGACATAAAGGTTTGGTCCTA  
GCCTTCCTATTAGCCATTAACAAGATTACACATGTAAGTCTCCACGCTCCAGTGAAAATGCC  
CCTTAAGTCCTCTTAGACGACCTAAAGGAGCGGGTATCAAGCACACCTTATGGTAGCTCACA  
ACGCCTTGCTTAGCCACACCCCCACGGGAAACAGCAGTGATAAAAATTAAGCTATGAACGA  
AAGTTCGACTAAGCTATGTTAATACTAGGGTTGGTAAATCTCGTGCCAGCCACCGCGGTCAT  
ACGATTAACCTCGAGTTAATAGGCCTACGGCGTAAAGCGTGTAAGAAAAAATCTCCTCTAC  
TAAAGTTAAAGTATGATTAAGCTGTAAAAAGCTACCATTAATACTAAAATAAACTACGAAA  
GTGACTTTAAAATTTCTGATTACACGATAGCTAGGGCCCAAACCTGGGATTAGATACCCCACT  
ATGCCTAGCTCTAAACATAGATATTTTACTAAACAAAACCTATTCGCCAGAGAACTACTAGCA  
ACAGCTTAAAACTCAAAGGACTTGGCGGTGCTTTATATCCCCCTAGAGGAGCCTGTTCTGTA  
ATCGATAAACCCCGATAGACCTCACCATCCCTTGCTAATTCAGTTTATATACCGCCATCTTCA  
GCAAACCCTTAAAAGGAAAAAAAGTAAGCATAACTACCCTACATAAAAAAGTTAGGTCAAG  
GTGTAACCTATGGGCTGGGAAGAAATGGGCTACATTTTCTATTCAAGAACAACCTTCTACGAA  
AACTTTTATGAACTAAAAGCTAAAGGCGGATTTAGTAGTAAATTAAGAATAGAGAGCTTA  
ATTGAACAGGGCAATGAAGCACGCACACACCGCCCGTCACCCTCCTCGAGTGATATAATTTA  
ATTATAACCTATTTAACTAAGCAAAGCATAAGAGGAGACAAGTCGTAACAAGGTAAGCAT  
ACTGGAAGGTGTGCTTGGATGAGCCAAAGTGTAGCTTAAACAAAGCGTCTGGCTTACATCCA  
GAAGATTTCAATTAATATGACTACTTTGAACCCAAAGCTAGCCCAAGCAACAATGACTAGT  
AAAACCATTATGAAACATTCAAACAAAACATTTAGTAGCATGACTAGAGTATAGGAGATAG

AAATTTTAACTGGAGCTATAGAGAGAGTACCGCAAGGGAATGATGAAAGATTACCTAAAG  
TGATAAACAGCAAAGATTGCCCCTTCTACCTTTTGTATAATGAGTTAGCTAGAAATAACTTA  
ACAAAGAGAACTTAAGCTAAGTCCCCGAAACCAGACGAGCTACCTATGAACAATCCACTG  
GGATGAACTCATCTATGTTGCAAAATAGTGAGAAGATCCATAGGTAGAGGTGAAAGGCCTA  
ACGAGCCTGGTGATAGCTGGTTGCCCAGAATAGAATTTTAGTTGACTTTAAACCTGCCTAC  
AAAATAATAATTCTAATGCAGATTTAAAAATATATTCTAAAAAGGTACAGCTTTTATAGAGTT  
AAGGATACAGCCTTACTTAGAGAGTAAATATTTATATAAGCCATAGTAGGCCTAGAGGCAG  
CCATCAATTAAGAAAGCGTTAAAGCTCAACATCTCTATTAACTTAATACCAAGAATATTTAA  
TCAACTCCTAATGTATTACTGGGTCAATCTATTTAAATATAGAAGTGATAATGCTAATATGA  
GTAACAAGAAATATTTCTCCCATGCATAAGCTTATAACAGCAACGGATAACCACTGATAGTT  
AACAACAACATAGAAATAACCTAATGATAAAACACCTATTAAATCAATTGTTAGTCCAACAC  
AGGCATGCAATCAGGGAAAGATTAAAAAGAGTGAAAGGAACTCGGCAAATACAAACCCCG  
CCTGTTTACCAAAAACATCACCTCCAGCATTTCAGTATTGGAGGCACTGCCTGCCCGGTGA  
CATCAGTTAAACGGCCGCGGTATTCTGACCGTGCAAAGGTAGCATAATCATTTGTTCTCTAA  
ATAAGGACTTGTATGAATGGCCACACGAGGGTTTAACTGTCTCTTACTTCCAATCAGTGAAA  
TTGACCTCCCCGTGAAGAGGCGGGGATAAGACAATAAGACGAGAAGACCCTATGGAGCTTT  
AATTAATAATTCAAAAAGAACTACTAACGACCCAACAGGAATAATATATCTCTTTTATGA  
ATTAGCAATTTAGGTTGGGGCGACCTCGGAGGACAAAATAGCCTCCGAGTGATTATAAATCT  
AGACTTACCAGTCAAAATGCTTAATCACTTATTGATCCAAAAATTCTTTTGATCAACGGAAC  
AAGTTACCCTAGGGATAACAGCGCAATCCTATCCGAGAGTCCATATCGACAATAGGGTTTAC  
GACCTCGATGTTGGATCAGGACATCCTAATGGTGCAGCAGCTATTAAAGGTTTCGTTTGTTCA  
ACGATTAAAGTCCTACGTGATCTGAGTTCAGACCGGAGCAATCCAGGTTCGTTTCTATCTAT  
TCAAATAATTTCTCCAGTACGAAAGGACAAGAGAAATAAGGCCTACTTCTCTGAAGCGCCT  
TAAGACCAATAGATGAATTTATCTAAATCTAGTAAATCTAACTCCAATATTGCCAAGAGAC  
AGGGCTTTGTTAGGGTGGCAGAGCCCGGTAATTGTGCAAACTTAACTCTTGTGTCCAGAG  
GTTCAATTCCTCTCCCTAGCATATGTTTATAATTAACATCTTCTCACTAATTGTACCTATTCTT  
CTTGCTGTAGCCTTTCTGACTCTAGTAGAACGAAAAGTACTAGGCTACATACAGCTTCGAAA  
AGGCCCAAATATTGTAGGTCCATATGGTCTCCTACAACCAATCGCAGATGCCGTAAACTCT  
TTACTAAAGAACCTTTACGACCACTTACGTCAATCCATAACTATATTTATTATAGCCCCTATTC  
TAGCCTTAACACTAGCTCTGACCATGTGAGTCCCCTTACCAATACCGCACCCCTTATTAACA  
TAAACCTAGGAGTACTATTCTACTAGCTATATCAAGTCTAGCTGTATACTCTATTCTCTGAT  
CTGGATGAGCCTCAAACCTCAAAATATGCCCTAATTGGAGCCCTACGAGCCGTAGCTCAAACG  
ATCTCATATGAAGTCACACTAGCCATTATCCTTTTATCCGTTCTACTAATAAATGGGTCATTT  
ACGCTATCCACGCTAATCATTACCCAAGAACATCTTTGATTAAATCTTCCCTGCATGACCACTA  
GCTATAATATGATTTATTTCTACCCTAGCAGAAACAAATCGAGCCCCCTTTGACCTAACAGA  
AGGAGAATCAGAACTAGTCTCTGGGTTTAAATGTGCAATATGCAGCAGGTCCATTTGCCCTGT  
TCTTCTAGCAGAATATGCCAACATCATCATAATAAATGCTCTTACAACCTATTCTATTCTTCG  
GAGCATTTACAGCCCCCTACATACCAGAATTATACATTGTAAATTTTACCGTAAAAACTTTAC  
TCCTCACAATCTCTTTTCTATGAATCCGAGCATCATATCCTCGATTCCGATACGACCAACTAA  
TACACCTACTATGAAAAAACTTTCTACCTCTCACACTAGCTCTATGTATATGACATGTAACCTC  
TACCTATTATTACAGCAAGCATTCCACCTCAAACGTAAGAAATATGTCTGACAAAAGAATTA  
CTTTGATAGAGTAAGCCATAGGGGGTTTAAAGTCCCCCTATTTCTAGAATCATAGGAATCGAAC  
CTAATCTTAAGAACTCAAAAATCTTCGTGCTACCTAACTACACCATATCCTAAAGTAAGGTC  
AGCTAAATAAGCTATCGGGGCCATACCCCGAAAATGTTGGTTTATCCCCTTCCCATACTAAT  
AAAACCAGCCATCCTTATTACCATTACATCCACCGTTGTCTTAGGAACTATAATTGTTCTATT  
TAGCTCCCACTGATTCATAATCTGAGTTGGCTTTGAAATAAATACTAGCCATTATCCCAAT  
TCTAATAAAAAAATATAACCCACGAGCCATAGAAGCTTCCACAAAATATTTTCTAACACAAG  
CTACAGCATCCATGCTTCTAATGCTAAGCATCATCATCAATCTACTATGCTCAGGACACTGG  
ACAGTTTCAACAATTCCCAATCCAGTAGCATCTACCATAATTACTATTGCTCTAACAAATAAA  
ACTTGGCCTATCACCATTTCACTTTTGAGTCCCAGAAGTTACACAAGGCATTTCCCTTATCTTC  
AGGAATAATCCTATTAACATGACAAAAAATTGCACCTTTATCCATTCTATACCAAATTTAC

CATCCGTTAACTCAAATCTCTTACTAATAATAGCTATCACATCCATACTGGTAGGAGGCTGA  
GGAGGATTAAATCAAACCCAACTCCGAAAAATCTTGGCATACTCCTCAATTACCCATATAGG  
CTGAATGGCTGCTATTATAGTATATAATCCTACCCTAGCAATTCTTAACCTAACAATTTACAT  
CATAATAACTCTAGGAACATTTATACTATTCATACATAGCTCATCTACAACAACACTATCACT  
ATCTTATACATGAAATAAATTCCCATTAAATAGCCCCACTAATCTTAATACTTATACTATCACT  
AGGAGGCCTCCCTCCTCTCTCAGGCTTTATCCCCAAATGAATAATTATTCAAGAATTAACAA  
AAAACGACATAATTATTATACCTACACTTATAGCCATTACAGCCCTACTAAACCTATATTTTT  
ACACACGCCTAACATATACTACAGCACTAACTATATTTCCCGCAACAAATAATATAAAAAATA  
AAATGACAATTCGAAACCACAAAAAAGACAACCTCTCCTAGCCCCCTCTAATCGTGACATCAAC  
TATACTACTACCACTAACCCCAATACTAGCAGCTCTTGATTAGAGATTTAGGCTAAACAGAC  
CAAGGGCCTTCAAAGCCTCAAGTAAGTGAAAATCCACTTAATCTCTGCAATATTTAAGGACT  
GCAAGAATCTACCTCACATCAACTGAACGCAAAACAATCGCTTTAATTAAGCTAAGCCCTTC  
TAGATCGGTGGGCTTTTACCCACAAAACTTTAGTTAACAGCTAAAAACCCTAGACAACCTGG  
CTTCAATCTACTTCTCCCGCCGCGTAGGAAAAAAGGCGGGGAGAAGCCCCGGCAGAATTGA  
AGCTGCTTCTTTGAATTTGCAATTCAATATGATTACTCACACAGAGCCTGGTAAAAAGAGG  
ACTTAACCCCCATTCTTAGATTTACAGTCTAGTGCTTTTATCAGCCATTTTACCTATGTTTCATT  
AACCGATGACTGTTTTCCACCAACCACAAAGATATTGGCACTCTTTATCTTCTGTTTGCGCA  
TGAGCTGGTATAACGGGGCACTGCTCTTAGCCTTCTAATCCGTGCTGAATTAGGTCAGCCTGG  
AGCTCTGTTAGGAGATGACCAAATTTACAATGTAGTTGTAAGTGGCCACGCATTTCGTAATAA  
TCTTCTTTATAGTTATGCCTATTATGATCGGAGGCTTTGGAAATTGACTAGTACCTTTGATAA  
TTGGTGCGCCTGATATAGCATTTCGCCGAATAAACAATATGAGTTTCTGATTACTACCTCCAT  
CCTTTCTTCTCCTTCTGGCTTCTTCCATAGTAGAAGCAGGCGCAGGGACTGGATGAAGTGTAT  
ACCCTCCTCTAGCAGGTAACCTTAGCCCATGCAGGAGCATCAGTAGACCTAACAACTCTTTTCT  
CTACATCTGGCAGGGGTTTCTTCTATTTTAGGGGCTATTAACCTTATTACCACTATCATCAAC  
ATGAAACCCCCTGCAATATCTCAATATCAAACCTCCCCTATTTCGTGTGATCAGTACTTATCACA  
GCAGTACTTCTCCTTCTATCTTTACCAGTCTTAGCAGCTGGAATTACTATACTACTTACAGAT  
CGAAATCTCAATACTACTTTCTTCGACCCGGCCGGAGGAGGGGATCCCATTCTATATCAACA  
TCTATTTTGATTCTTTGGCCATCCTGAAGTCTATATTCTAATCCTCCCTGGGTTTGGAATAATT  
TCACACATTGTACATACTATTTCAGGAAAGAAAGAGCCCTTTGGTTATATGGGAATAGTGTG  
GGCAATAATGTCAATTGGATTCTTAGGATTTATTGTATGGGCCCATCATATATTTACTGTAGG  
CATAGATGTTGATACACGAGCCTATTTACCTCGGCCACTATAATTATTGCAATCCCGACAG  
GAGTTAAAGTATTCAGCTGACTAGCTACCCTGCATGGAGGAAATATTAAGTGATCCCCTGCC  
ATAATGTGAGCCCTAGGTTTCATTTTTCTATTTACAGTAGGGGGTCTTACAGGCATTGTTCTA  
GCTAACTCATCTCTGGACATTGTCCTCCATGACACATACTACGTAGTAGCACACTTCCACTAT  
GTACTATCAATAGGGGGCCGTGTTTCGCTATTATAGGAGGCTTCGTCCATTGATTCCCATTATTT  
TCGGGCTATACACTTAATAATACATGAGCAAAAATTCACTTCGTAATTATATTTGTTGGAGTC  
AATATAACATTCTTCCCCCAGCACTTCCTAGGTCTATCAGGTATGCCTCGACGATATTCTGAT  
TATCCAGACGCCTATACAGCATGAAACACAGTGTCTTCAATGGGTTCATTTCATTCTACTAAC  
AGCAGTTATGTTAATAATTTTCATAATTTGAGAAGCCTTCGCATCTAAACGAGAAGTGGCAG  
TGATTGAGCTTACTACAACATAATTGAATGGCTCCACGGATGCCCTCCCCCATACCATACA  
TTCGAAGAGCCCCGCCACGTCATACTGAAATAAGAAAGGAAGGAATCGAACCCCTCTAGAAT  
TGGTTTCAAGCCAGCATCATAACCACTATGTCTCTCTCAATAAAGAGGTATTAGTAAAAATT  
ACATAACTTTGTCAAAGTTGAATTATAGGTGAAAATCCTTTATATCTCTATGGCGCATCCCTT  
TCAAACAGGCCTTCAAGATGCAACTTCCCCCATCATGGAAGAAGTCTTACACTTCCATGATC  
ATACACTAATAATTGTATTCTTAATTAGTTCCTTAGTTCTCTATATCATTTCATTATATTAAC  
TACTAAATTAACACATACAAATACAATAGACGCACAAGAAGTGGAGACAGTATGAACTATT  
CTACCAGCTATCATCTTAATTATAATTGCACCTCCATCACTACGAATTCTTTATATGATAGAT  
GAAATTAATAACCCATCATTAACCTGTAAAGACTATGGGGCATCAATGATACTGAAGCTATGA  
GTATACAGATTATGAAGACTTGAGCTTCGATTCTTATATAACCCCAACACAAGAATTAAGC  
CCGGAGAGCTGCGATTACTAGAGGTAGATAATCGAGTAGTACTACCCATAGAAATAACAAT  
TCGCATATTAATTTCTCAGAAGATGTGCTACATTCGTGAGCTGTCCCATCTCTAGGACTAAA



AACTGATGCAATCCCGGGGCGATTAAATCAAACAACTCTTATGGCCATGCGACCAGGACTAT  
ATTATGGCCAATGCTCAGAGATTTGCGGTTCTAATCATAGCTTTATACCCATTGTACTTGAAA  
TAGTTCGCTGTCTTACTTTGAAAAATGATCCGCTTCAATACTATAAAATCATTAAGAAGCTT  
TATAGCGTTAACCTTTTAAGTTAAAGACTGAGAGTGCAAGTCTCTCCTTAATGGAAATGCCA  
CAATTAGACACATCCACATGATTTATTACAATCCTATCCATGATCTTAACACTATTTATTATA  
TTTCAGTTAAAAGTCTCAAAACACAACCTATCCTGAGTTTCCTGAATTA AAAACAACCCCACT  
ATCAAAAAAACCTATGCCTTGAGAAGAAAAATGAACGAAAATCTGTTGCGCTCTTTTACTAC  
CCCAATGATAATAGGAGTACCAATTGTGGTTCTGATTATTATTTTCCCAAGTATCTTATTTCC  
CTCACCTAATCGATTAATCAATAACCGCCTAGCTACTGTCCAACAATGATTAATTCAATTAGT  
ATCTAAGCATATACTGTCTATTCACAATTATAAAGGACAAACCTGAGCGCTAATACTAATGT  
CATTAATTTTATTTATTGGCTCAACTAACCTTTTAGGCCTATTACCACATTCATTACACCTAC  
TACACAACCTATCAATAAATTTAGGAATGGCCATTCTCTGTGAGCAGGTACAGTAGTTATAG  
GATTTGACACAAAACCTAAGGCATCTCTGGCCCACTTTCTACCCCAAGGAACACCTCTTCCT  
CTGATCCCAATGTTAGTAATTATCGAGACAATTAGTCTGTTTATTCAACCTGTGGCCCTAGCT  
GTACGACTGACCGCTAATATTACTGCAGGCCATCTACTTATTCATTTAATCGGAGGGGCTAC  
CCTAGTTTTAATAAACATTAACCTGTAAACAGCCCTAATTACCTTTATTATTCTTATTCTACTT  
ACTATTCTCGAATTAGCTGTAGCTCTTATCCAAGCCTATGTTTTACCCCTACTAGTTAGTCTA  
TACTTACATGATAATACCTAATGATCCACCAAACACATGCATATCATATAGTTAATCCAAGC  
CCATGGCCACTTACAGGAGCTCTCTCGGCTCTTCTTATAACATCAGGACTAATTATATGATTT  
CACTTTAACTCGGTATACTTACTAATACTAGGCCTCACCACCAACATACTTACCATGTACCAA  
TGATGACGAGATATCGTCCGGGAAAGTACCTTCCAAGGCCATCACACCCCAATCGTCCAAAA  
AGGACTACGATATGGAATAGTCTTATTTATTGTATCAGAAGTATTTTTCTTCGCGGGATTCTT  
TTGGGCCTTCTACCACTCAAGCCTAGCACCTACTCCTGAATTAGGAGCATGTTGACCACCTA  
CAGGTATCATCCCCTTAAATCCGCTAGAAGTCCACTACTTAACACCTCTGTACTTCTAGCAT  
CTGGGGTATCTATCACTTGAGCTCATCATAGTCTAATAGAAGGAGACCGCAAACATATGCTC  
CAAGCCCTATTTATTACTATTTCACTAGGAGTTTATTTTACACTTCTACAAGCCTCAGAATAC  
TATGAGACATCCTTTACTATTTCAAGATGGAGTGTATGGTTCAACCTTCTTTATAGCAACTGGA  
TTTCATGGGCTTCATGTAATTATTGGTTCAACTTTTCTTACTGTGTGTTTTCTACGACAACTGC  
ACTTTCACTTTACATCCAACCATCACTTTGGCTTTGAAGCGGCAGCATGATACTGACACTTCG  
TAGACGTTGTATGGCTTTTCCTTTATGTTTCTATTTACTGATGAGGATCCTACTTCTTTAGTAT  
TAACTAGTACGATTGACCTCCAATCAATAGGCTCTGGTACAAGCCAGAAAGAAGTAATAAA  
CCTAATTCTAGCACTTCTAACCAACGTATTATTAGCCTCTCTGCTCGTTCTTATTGCATTCTGA  
CTGCCACAACCTAAATATCTATGCAGAAAAAGTAAGTCCTTATGAATGTGGATTGATCCTAT  
AGGATCAGCACGCCTTCCTTTCTCTATAAAATTTTTCTAGTAGCTATTACATTCCTTTTATTC  
GACTTAGAAATTGCTCTACTCCTCCCGCTTCCTTGAGCATTACAGACTAACAACCTAATAACT  
ATACTTATTATAGCTCTATTACTCATTTCCCTATTAGCCGCAAGCCTAGCTTATGAGTGAACC  
GAAAAGGGGCTAGAATGGGCCGAATATGATAATTAGTTTAACTAAAATAAGTGATTTGCA  
CTCACTAGATTATGACTAACATCATAATTATCAAATGTCTGTGGTCTATATTAATCTCTTTCT  
AGCCTTTACTATATCCTTAATAGGGCTACTCATCTATCGATCCCATTTAATATCCTCCCTATT  
ATGCTTAGAAGGCATGATGCTGTCACTATTTGTTATACTAGCAGTAACAATCCTAAGTAACC  
ACTTCACACTAGCCAGTATGACTCCAATCATTCTATTAGTATTTCGCTGCCTGTGAAGCAGCGT  
TGGGGCTTTCTCTGCTAGTAATAGTCTCTAATACCTATGGAAGTACTACGTACAAAATCTTA  
ACCTCCTACAATGCTAAAAATTATCCTCCCTACCATAATACTAGTACCCCTTACATGAATATC  
AAAGCCTAACATAATCTGAATTAATACAACAACCTATAGTCTACTCATCAGCCTTATTAGTC  
TGACATATCTCAATCAACTCAGTGATAATAGTCTAAACTTCTCATTAAACATTCTTTACCGACT  
CCCTATCAGCCCCCTGTTAGTTCTCACAACATGACTACTGCCCTTAATACTTATAGCTAGTC  
AATTCACCTGTCAAAAGAGACCCTGACCCGAAAAAATTATATATCACAATACTAATTCTC  
CTGCAACTATTCTTAATTATAACATTTTCTGCTACTGAGTTAATCATATTCTATATTTTATTTG  
AAGCTACCCTGGTACCGACTTTAGTTATCATTACTCGATGAGGAAACCAAACAGAACGACTA  
AACGCGGGCCTCTATTTTTTATTCTACACCTTAGTAGGATCCTTGCCCTTACTAGTTGCACTG  
TTATATGCCCAAAACAGCTTAGGATCACTAAATTTTCTCATAGTACAGTACTGAACTCAGCC

CTTGCCAAATTCCTGATCTAACATTTTCATGTGGCTGGCATGTATAATAGCATTTCATAGTAAA  
AATACCGCTATATGGCTTACACCTATGACTACCTAAAGCACATGTAGAAGCTCCTATTGCAG  
GATCCATAGTACTTGCTGCAGTACTTCTAAAACTAGGGGGATACGGTATAATGCGGATTACA  
ACAATACTCAACCCTCTAACAAATTTTATAGCCTACCCCTTCATAATGCTCTCACTATGAGGA  
ATAATCATAACAAGTTCTATTTGTTTACGCCAGACAGACCTAAAGTCCCTAATTGCATACTCC  
TCTGTTAGTCACATAGCCCTAGTCATTGTAGCAATTCTAATCCAATCCCCATGAAGCTACATA  
GGAGCTACTGCTCTAATAATCGCCCATGGGTAAACATCTTCTATGCTATTCTGTCTTGCAAAC  
TCTAACTACGAGCGAACCCATAGCCGAACTATAATTCTCGCACGGGGCTTGCAAACGCTTCT  
TCCACTTATAGCAGCTTGATGACTATTAGCAGGCCTAACTAACTTAGCTCTTCCTCCTACAAT  
TAATCTGATTGGGGAAGTGTGTTAGTGATAGCCACATTTTCATGATCCAATATTACCATTCT  
CTTAATAGGAGTTAACATTACCATTACTGCTCTCTACTCTCTATATATACTAATTTCTACACA  
GCGAGGCAAGTATACAGACCACATCAAAAATATTAAGCCATCTTATACACGAGAAAAATGCC  
TTAATAGCCTTACATTTACTACCCCTTTTACTTCTATCTCTTAACCCTAAAGTAGTTCTAGGCT  
TTATTTACTGTAAATATAGTTTAAACAAAAACATTAGATTGTGAATCTAGTAATAAAAGCTTA  
AATCTTTTTATTTACCGAAAAAGCATGCAAGAACTGCTAATTCATGCACCCATGCATAAAAT  
CATGGCTTTTTCAACTTTTAGGGGATAGAAGTAATCCATTGGTCTTAGGAGCCAAAAAATTG  
GTGCAACTCCAAATAAAAAGTAATTAACCTACTTACCTCCTTCACCATTACAACCCTATTTATA  
TTAATCATGCCCATATCCTAACCTGTACCCACAGCATATGAAAATAAACTTTACCCGCAATAT  
GTAAAAACCACAGTCTCTTATGCCTTCACAATTAGCATAAATCCCATAGTAATATTCATCCAC  
TCCGGACAAGAAGCAATCATCTCAAACCTGACACTGAATAACCATCCAAACCCTAAAACCTCA  
GTCTAAGCTTCAAATTAGATTACTTTTCAATAATCTTCGTACCAGTGGCCCTATTCGTACACAT  
GGTCAATTATAGAATTCTCTATATGATATATACACGCAGATCCTAACATTAACCGATTCTTTA  
AATATCTACTTATATTCCTCGTCACGATAATAATTCTAGTAACCGCAAATAATCTATTTACAGC  
TATTTATCGGCTGAGAGGGAGTAGGAATCATATCATTCTCCTCATTGGATGATGATATGGA  
CGAACAGATGCTAATACGGCTGCCCTACAAGCAGTACTATACAACCGCATTGGAGATGTTGG  
TTTTATCATGGCCATAGCTTGATTCTTACTCAATACAAATGCATGGGACTTCCAACAAATCTT  
TATAATCGAGCATAAAAAACCTCAATATTCCACTGGCAGGACTACTTCTAGCAGCTACCGGAA  
AGTCTGCCCCAATTTGGACTTCACCCATGACTCCCATCAGCCATAGAAGGCCCCACTCCTGTCT  
CAGCACTACTTCACTCTAGCACAAATAGTAGTAGCAGGCGTATTTCTTCTAGTCCGATTTACCC  
CCTTAATAGAACATAACAAGACAATTCAAACGGTTACCCTATGCTTAGGGGCAATAACAACC  
TTGTTTACAGCAATCTGCGCCCTTACCCAAAATGATATCAAAAAAATTATTGCCTTCTCCACC  
TCGAGCCAACTAGGACTAATAATTGTAACAATTGGTATTAATCAGCCTCATCTGGCCTTTCTC  
CATATCTGCACGCACGCATTCTTCAAGGCCGTGCTATTTCTATGCTCCGGATCTATTATTCAT  
AGTCTAAACAACGAACAAGATATTCGAAAGATAGGAGGGCTATTTAAAAGTCTACCATTTA  
CCACTACTGCTCTAATCATCGGAACTCTAGCACTTACAGGAATGCCCTTCTTAACAGGATTTT  
ACTCCAAAGACTTAATTATTGAAACCGCCAATACGTCATACACCAACGCCTGAGCCTTACTA  
ACAACCCTTATCGCCACATCCATAACTGCCGCCTACAGTACTCGAATTGTATTTTTTACACTT  
CTAGGACAACCTCGCTATAGTCCCATATCACCATTAACGAGAATAACCAGTTCCTGACTAA  
CTCTGTCAAACGATTGCTACTAGGAAGTATCTTTGCGGGATTCTAATCTCTCATAACATTAC  
ACCCACCACTGTCCCACAAATAACCATGCCCTGTCACCTAAAAATGATAGCCCTTACAGTAA  
CAATCCTAGGCTTTATTCTAGCACTAGAACTTAACCTAGCCATACAAAATCTCAAATTTGACT  
ACCCTTTAAGCACGTTCAAATTTTCAAATCAACTAGGATATTTCCCTACTACTCTGCATCGTC  
TCGCACCAATAATAGGTCTATCAATAAGCCAAAAAACAGCATCCATACTGCTAGATGCAATC  
TGACTAGAGAATGTTCTACCAAAGTCCATCTCCTACTTTCAAATAAAAATCCTCAATCACAGT  
CTCCAACCAAAAGGGACTAATTAACTATACTTTCTCTCCTTTATAATTACACTAGTCTTAAG  
TCTCTTTATACTTAATTTCCACGAGTGACTTCCATAATTACCAATACACCAATAAGGAGAGAT  
CATCCAGTAACAATAACTAATCAAGTACCATAACTATATAAAGCTGCAATTCCCATAGCCTC  
TTCATAAAAAATCCTGAATCCCCTGTGTCATAAATCACCCAATCTCCTATTCCATTAACTT  
AAATACTACCTCGGCTTCATCATCCTTTAAAATATAACAAACAGCCAGTAACTCAGACAACA  
GACCTACAATAAATGCACCTAGTACAGCCTTATTAGAAAGTCAAACCTCAGGATATTGCTCA  
GTGGCTATGGCCGTAGTGTACCCGAACACTACAAGTATACCCCTAAATAAATTA AAAAGAC

CATTAAACCCAAAAAAGATCCTCCAAAGCTTAACACAATACCACACCCTACACCCCCACTAA  
CAATCAAGACTAAACCTCCGTAGATAGGAGAGGGGCTTAGAAGAAAACCCCGCAAACTAAC  
TACAAAAACGATACTTAAAATAGATACAATGTATGTTATCATCATTCTTACATGGAATCTAA  
CCATGACCAATGACATGAAAAATCATCGTTGTATTTCAACTATAAGAACCCCAATGATCAAC  
ATCCGAAAAACTCATCCATTAGTTAAAATTATCAACAACCTATTCATTGACCTTCCAACACC  
ATCAAACATTTCAACATGATGAAACTTTGGGTCCCTGTTAGGAGTGTGTCTGATCTTGCAAA  
TCTTAACAGGCTTATTTCTAGCCATACACTATACATCAGATACAGCTACAGCCTTTTCATCAG  
TCGCACACATTTGTGCGAGACGTCAACTATGGTTGATTTATCCGATATATACATGCCAATGGG  
GCCTCTATATTTTTTATCTGCCTATTTATACACGTAGGGCGAGGCTTATACTATGGATCATAC  
CTATTTCCAGAGACATGGAATATCGGAATTATTCTCCTACTTACAGTTATAGCCACAGCATTCT  
ATAGGGTATGTACTACCTTGAGGACAAATATCCTTCTGAGGAGCAACCGTCATTACTAACCT  
ACTATCAGCAATTCCTTACATTGGCACTAATCTAGTGGAGTGAGTCTGAGGGGGTTTCTCCG  
TAGATAAAGCAACACTAACCCTGATTTTTTGTCTTTTCACTTTATCCTTCCATTTATCATCTCAGC  
ACTAGCAATAGTCCATCTATTATTCCTTACGAAACAGGATCTAATAACCCCTCCGGAATTC  
CATCTGACCCAGACAAAATCCCATTTTACCCCTATCATACAATTAAAGACATCCTAGGCGTC  
CTATTTCTTGTCTCGCCTTAATAACCCTGGCTTTATTCTCACCAGACCTGTTAGGAGACCCT  
GATAACTATACCCCTGCAAATCCACTAAGTACCCCGCCACATATTAAGCCTGAATGGTACTT  
TCTATTTGCCTACGCTATCCTGCGATCTATTCTTAATAAACTAGGAGGGGTGCTAGCTCTAAT  
CTTCTCTATTCTAATTCTAACTATTATTCCACTATTACATACATCCAAACAACGAAGCATGAT  
ATTCCGACCTCTAAGTCAATGCTTATTCTGACTCCTAGTAGCAGACCTACTCACACTAACATG  
AATTGGAGGACAGCCAGTAGAACACCCCTTCATTATTATTGGGCAATTGGCCTCTATTCTCT  
ACTTTACAATTCTTCTAGTACTTATACCTATCACTAGCATTATTGAGAATAGCCTCTCAAAAT  
GAAGAGTCTTTGTAGTATATTAATTACTTTGGTCTTGTAACCAAAAACGGAGATTCTCTAC  
TTCTCCCTAAGACTCAAGGAAGGAGCAACAACCCCACTACCAGCACCCAAAGCTGGTGTCT  
ACTTAAACTATCCCCTG

>SRR6109216 (circular)

ATACTATAAATCCACCTCTCATTTTATTCACTTCATACATGTTATTACACACTCTGTGCCATC  
ATAGTATGTTTTCATACATCCTCCCTTCTTTCACACCCTATGTATGTCGTACATTAATGGTGTA  
CCCCCCTCCCCCTATGTATATCGTGCATTAATGGCGTGCCCCATGCATATAAGCATGTACA  
TACTGTGCTTGGCTTACATGAGGATACTCATTACAAGAACTTATTTCAAGCGATAGTCTATG  
AGCATGTATTTCACTTAGTCCAAGAGCTTGATACCAAGCCTCGAGAAACCAGCAATCCTTG  
CGAGTACGTGTACCTCTTCTCGCTCCGGGGCCATAATTTGTGGGGGTTTCTATACTGAACTA  
TACCTGGCATCTGGTTCTTACTTCAGGGCCATGTTAGCGTCAACTCAATCCTACTAACCCCTTC  
AAATGGGACATCTCGATGGACTAATGACTAATCAGCCCATGATCACACATAACTGTGGTGTC  
ATGCATTTGGTATTTTTTAATTTTTAGGGGGGGAACCTTGCTATGACTCAGCTATGACCGTAAA  
GGTCTCGTCGCAGTCAAATCAGCTGTAGCTGGGCTTATTCATCTTTTCGAGGCTCCTCATAGAC  
ACCCATAAGGTGCAATTCAGTCAATGGTCACAGGACATAACACTATAGATCACCCGGACTG  
GCGTTACGTGTACGTACGTGTACGTACGTGTACGTACGTGTACGTACGTGTACGTACGTGTA  
CGCACGTGTACGTACGTGTACGCACGTGTACGTACGTGTACGCACGTGTACGTACGTGTACG  
TACGTGTACGTACGTGTACGCACGTGTACGTACGTGTACGCACGTGTACGTACGTGTACGTA  
CGTGTACGCACGTGTACGCACGTGTACGCACGTGTACGCACGTGTACGCACGTGTACGCACG  
TGTACGCACGTGTACGTACGTGTACGTACGTGTACGTACGTGTACGCGTACGTATTTTAGAT  
ACTAAGTTAGCTTAGACAAACCCCCCTTACCCCCCGTAACTTCAAGAAGCTTACATATACTT  
ATGGATGTCCTGCCAAACCCCAAAAACAAGACTAAATATATGCGCAAACATGAAGTCACTT  
ACACCTAAACCCATATAATTAAGCTAACCCCCCAGCCAATGTTGCAACAACACTACGGACATGG  
GACTCTAAATTTTAATTTATCTATAGATATTTTTCTTTTACTGTGTCTCCCCAGCATTGATTTT  
TTAATTATCATTATTCCACACCACCAATTTCCATTGAGCTATTTACATGAGTTCCAAATCAA  
TTATGTTTCATGTAGCTTAACGAATAAAGCAAGGTACTGAAAATGCCTAGATGGGTCACGCTA  
CCCCATAGACATAAAGGTTTGGTCCTAGCCTTCCTATTAGCCATTAACAAGATTACACATGT  
AAGTCTCCACGCTCCAGTGAAAATGCCCTTAAGTCCTCTTAGACGACCTAAAGGAGCGGGT  
ATCAAGCACACCTTATGGTAGCTCACAACGCCTTGCTTAGCCACACCCCCACGGGAAACAGC

AGTGATAAAAATTAAGCTATGAACGAAAGTTCGACTAAGCTATGTTAATACTAGGGTTGGTA  
AATCTCGTGCCAGCCACCGCGGTCATACGATTAAGCTCGAGTTAATAGGCCTACGGCGTAAAG  
CGTGTAAGAAAGAAAAAATCTCCTCTACTAAAGTTAAAGTATGATTAAGCTGTAAAAAGCTACC  
ATTAATACTAAAATAAACTACGAAAGTGACTTTAAAATTTCTGATTACACGATAGCTAGGGC  
CCAAACTGGGATTAGATACCCCACTATGCCTAGCTCTAAACATAGATATTTTACTAAACAAA  
ACTATTCGCCAGAGAACTACTAGCAACAGCTTAAACTCAAAGGACTTGGCGGTGCTTTATA  
TCCCCCTAGAGGAGCCTGTTCTGTAATCGATAAACCCCGATAGACCTCACCATCCCTTGCTA  
ATTCAGTTTATATACCGCCATCTTCAGCAAACCCCTTAAAAGGAAAAAAAAGTAAGCATAACTA  
CCCTACATAAAAAAGTTAGGTCAAGGTGTAACCTATGGGCTGGGAAGAAATGGGCTACATT  
TTCTATTCAAGAACAACCTTCTACGAAAACCTTTTATGAAACTAAAAGCTAAAGGCGGATTTAG  
TAGTAAATTAAGAATAGAGAGCTTAATTGAACAGGGCAATGAAGCACGCACACACCGCCCCG  
TCACCCTCCTCGAGTGATATAATTTAATTATAACCTATTTAACTAAGCAAAGCATAAGAGG  
AGACAAGTCGTAACAAGGTAAGCATACTGGAAAGTGTGCTTGGATGAGCCAAAGTGTAGCT  
TAAACAAAGCGTCTGGCTTACATCCAGAAGATTTTATTAAATATATGACTACTTTGAACCCAA  
AGCTAGCCCAAGCAACAATGACTAGTAAAACCATTATGAAACATTCAAACAAAACATTTAG  
TAGCATGACTAGAGTATAGGAGATAGAAATTTTTAACTGGAGCTATAGAGAGAGTACCGCA  
AGGGAATGATGAAAGATTACCTAAAGTGATAAACAGCAAAGATTGCCCTTCTACCTTTTGT  
ATAATGAGTTAGCTAGAAATAACTTAACAAAGAGAACTTAAGCTAAGTCCCCCGAAACCAG  
ACGAGCTACCTATGAACAATCCACTGGGATGAACTCATCTATGTTGCAAAATAGTGAGAAG  
ATCCATAGGTAGAGGTGAAAGGCCTAACGAGCCTGGTGATAGCTGGTTGCCCAGAATAGAA  
TTTTAGTTCGACTTTAAACCTGCCTACAAACTAATAATTCTAATGCAGATTTAAAAATATATT  
CTAAAAAGGTACAGCTTTTTAGAGTTAAGGATACAGCCTTACTTAGAGAGTAAATATTTATA  
TAAGCCATAGTAGGCCTAGAGGCAGCCATCAATTAAGAAAGCGTTAAAGCTCAACATCTCT  
ATTAACCTAATACCAAGAATATTTAATCAACTCCTAATGTATTACTGGGCCAATCTATTTAAA  
TATAGAAGTGATAATGCTAATATGAGTAACAAGAAATATTTCTCCCATGCATAAGCTTATAA  
CAGCAACGGATAACCACTGATAGTTAACAACAACATAGAAATAACCTAATGATAAAACACC  
TATTAAATCAATTGTTAGTCCAACACAGGCATGCAATCAGGGAAAGATTAAAAGAAGTGAA  
AGGAACTCGGCAAAACACAAACCCCGCCTGTTTACCAAAAACATCACCTCCAGCATTTCCAGT  
ATTGGAGGCACTGCCTGCCCGGTGACATCAGTTAAACGGCCGCGGTATTCTGACCGTGCAAA  
GGTAGCATAATCATTTGTTCTCTAAATAAGGACTTGTATGAACGGCCACACGAGGGTTTAAC  
TGTCTCTTACTTCCAATCAGTGAAATTGACCTCCCCGTGAAGAGGCGGGGATAAGACAATAA  
GACGAGAAGACCCTATGGAGCTTTAATTAATAATTCAAAAAGAACTACTAACGACCCAA  
CAGGAATAATATATCTCTTTTATGAATTAGCAATTTAGGTTGGGGCGACCTCGGAGGACAAA  
ATAGCCTCCGAGTGATTATAAATCTAGACTTACCAGTCAAAATGCTTAATCACTTATTGATCC  
AAAAATTCTTTTGATCAACGGAACAAGTTACCCTAGGGATAACAGCGCAATCCTATCCGAGA  
GTCCATATCGACAATAGGGTTTACGACCTCGATGTTGGATCAGGACATCCTAATGGTGCAGC  
AGCTATTAAAGGTTTCGTTTGTTCACGATTAAAGTCCTACGTGATCTGAGTTCAGACCGGAG  
CAATCCAGGTTCGTTTCTATCTATTCAAATAATTTCTCCAGTACGAAAGGACAAGAGAAAT  
AAGGCCTACTTCTCTGAAGCGCCTTAAGACCAATAGATGAATTTATCTAAATCTAGTAAATC  
TAACTCCAATATTGCCCAAGAGACAGGGCTTTGTTAGGGTGGCAGAGCCCGGTAATTGTGCA  
AACTTAAACTCTTGTGTCCAGAGGTTCAATTCCTCTCCCTAGCATATGTTTATAATTAACAT  
CTTCTCACTAATTGTACCTATTCTTCTTGCTGTAGCCTTTCTGACTCTAGTAGAACGAAAAGT  
ACTAGGCTACATACAGCTTCGAAAAGGCCCAAATATTGTAGGTCCATATGGTCTCCTACAAC  
CAATCGCAGATGCCGTAAACTCTTTACTAAAGAACCTTTACGACCACTTACGTCATCCATA  
ACTATATTTATTATAGCCCCTATTCTAGCCTTAACACTAGCTCTGACCATGTGAGTCCCCTTA  
CCAATACCGCACCCCCTTATTAAACATAAACCTAGGAGTACTATTCTACTAGCTATATCAAG  
TCTAGCTGTATACTCTATTCTCTGATCTGGATGAGCCTCAAACCTCAAATATGCCCTAATTGG  
AGCCCTACGAGCCGTAGCTCAAACGATCTCATATGAAGTCACACTAGCCATTATCCTTTTAT  
CCGTTCTACTAATAAATGGCTCATTTACGCTATCCACGCTAATCATTACCCAAGAACGTCTTT  
GATTAATCTTCCCTGCATGACCACTAGCTATAATATGATTTATTTCTACCCTAGCAGAAACAA  
ATCGAGCCCCCTTTGACCTAACAGAAGGAGAATCAGAACTAGTCTCTGGGTTTAATGTGCAA

TATGCAGCAGGTCCATTTGCCCTGTTCTTCCTAGCAGAATATGCCAACATCATCATAATAAAT  
GCTCTTACAACCTATTCTATTCTTCGGAGCATTTTACAGCCCCTACATACCAGAATTATATATT  
GTTAATTTTACCGTAAAAACTTTACTCCTCACAATCTCTTTTCTATGAATCCGAGCATCATAT  
CCTCGATTCCGATATGACCAACTAATACACCTACTATGAAAAAACTTTCTACCTCTCACACTA  
GCTCTATGTATATGACATGTAACCTCTACCTATTATTACAGCAAGCATTCACCTCAAACGTAA  
GAAATATGTCTGACAAAAGAATTACTTTGATAGAGTAAGCCATAGGGGTTTAAGTCCCCTTA  
TTTCTAGAATCATAGGAATCGAACCTAATCTTAAGAACTCAAAAATCTTCGTGCTACCTAAC  
TACACCATATCCTAAAGTAAGGTCAGCTAAATAAGCTATCGGGCCCATACCCCGAAAATGTT  
GGTTTATCCCCTTCCCATACTAATAAAACCAGCCATCCTTATTACCATTACATCCACCGTTGT  
CTTAGGAACATAATTGTTCTATTTAGCTCCCACTGATTCATAATCTGAGTTGGCTTTGAAAT  
AAATATACTAGCCATTATCCCAATTCTAATAAAAAAATATAACCCACGAGCCATAGAAGCTT  
CCACAAAATATTTTCTAACACAAGCTACAGCATCCATGCTTCTAATGCTAAGCATCATCATC  
AATCTACTATGCTCAGGACACTGGACAGTTTCAACAATTCCCAATCCAGTAGCATCTACCAT  
AATTACTATTGCTCTAACAATAAAACTTGGCCTATCACCATTTCACTTTTGAGTCCCAGAAGT  
TACACAAGGCATTTCTTATCTTCAGGAATAATCCTATTAACATGACAAAAAATTGCACCTTT  
ATCCATTCTATACCAAATTTACCATTCCGTTAACTCAAATCTCTTACTAATAATAGCTATCAC  
ATCCATACTGGTAGGAGGCTGAGGAGGATTAAATCAAACCCAACTCCGAAAAATCTTGGA  
TACTCCTCAATTACCCATATAGGCTGAATGGCTGCTATTATAGTATATAATCCTACCCTAGCA  
ATTCTTAACCTAACAATTTACATCATAATAACTCTAGGAACATTTATACTATTTCATACATAGC  
TCATCTACAACAACACTATCACTATCTTATACATGAAATAAATTCCCATTAAATAGCCCCACTA  
ATCTTAATACTTATACTATCACTAGGAGGCCTCCCTCCTCTCTCAGGCTTTATCCCCAAATGA  
ATAATTATTCAAGAATTAACAAAAAACGACATAATTATTATACCTACACTTATAGCCATTAC  
AGCCCTACTAAACCTATATTTTTACACACGCCTAACATATACTACAGCACTAACTATATTTCC  
CGCAACAAATAATATAAAAAATAAAATGACAATTTCGAAACCACAAAAAAGACAACCTCTCCTA  
GCCCCTCTAATCGTGACATCAACTATACTACTACCACTAACCCCAATACTAGCAGCTCTTGAT  
TAGAGATTTAGGCTAAACAGACCAAGGGCCTTCAAAGCCTCAAGTAAGTGAATAATCCACTT  
AATCTCTGCAATATTTAAGGACTGCAAGAATCTATCTCACATCAACTGAACGCAAAACAATC  
GCTTTAATTAAGCTAAGCCCTTCTAGATCGGTGGGCTTTTACCCACAAAACCTTTAGTTAACA  
GCTAAAAACCCTAGACAACCTGGCTTCAATCTACTTCTCCCGCCGCGTAGGAAAAAAGGCG  
GGAGAAGCCCCGGCAGAATTGAAGCTGCTTCTTTGAATTTGCAATTCAATATGATTACTCAC  
CACAGAGCCTGGTAAAAAGAGGACTTAACCCCCATTCTTAGATTTACAGTCTAGTGCTTTTA  
TCAGCCATTTTACCTATGTTTCAATTAACCGATGACTGTTTTCCACCAACCACAAAGATATTGGC  
ACTCTTTATCTTCTGTTTGGCGCATGAGCTGGTATAACGGGCACTGCTCTTAGCCTTCTAATC  
CGTGCTGAATTAGGTCAGCCTGGAGCTCTGTTAGGAGATGACCAAATTTACAATGTAGTTGT  
AACTGCCCACGCATTCGTAATAATCTTCTTTATAGTTATGCCTATTATGATCGGAGGCTTTGG  
AAATTGACTAGTACCTTTGATAATTGGTGCGCCTGATATAGCATTTCCCCGAATAAACAATA  
TGAGTTTCTGATTACTACCTCCATCCTTTCTTCTCCTTCTGGCTTCTTCCATAGTAGAAGCAGG  
CGCAGGGACTGGATGAACTGTATACCCCCCTCTAGCAGGTAACCTAGCCCATGCAGGAGCAT  
CAGTAGACCTAACAATCTTTTCTCTACATCTGGCAGGGGTTTCTTCTATTTTAGGGGCTATTA  
ACTTTATTACCACTATCATCAACATGAAACCCCTGCAATATCTCAATATCAAACCTCCCCTAT  
TCGTGTGATCAGTACTTATCACAGCAGTACTTCTCCTTCTATCTTTACCAGTCTTAGCAGCTG  
GAATTACTATACTACTTACAGATCGAAATCTCAATACTACTTTCTTCGACCCGGCCGGAGGA  
GGGGATCCCATTCTATATCAACATCTATTTTGATTCTTTGGCCATCCTGAAGTCTATATTCTA  
ATCCTCCCTGGGTTTGAATAATTTACACATTGTACATACTATTTCAGGAAAGAAAGAGCC  
CTTTGGTTATATAGGAATAGTGTGGGCAATAATGTCAATTGGGTTCTTAGGATTTATTGTATG  
GGCCCATCATATATTTACTGTAGGCATAGATGTTGATACACGAGCCTATTTTACCTCGGCCAC  
TATAATTATTGCAATCCCGACAGGAGTTAAAGTATTACAGTACTAGCTACCCTGCATGGAG  
GAAATATTAAGTGATCCCCTGCCATAATGTGAGCCCTAGGTTTCAATTTTCTATTTACAGTAG  
GGGGTCTTACAGGCATTGTTCTAGCTAACTCATCTCTGGACATTGTCCTCCATGACACATACT  
ACGTAGTAGCACACTTCCACTATGTACTATCAATAGGGGCCGTGTTTCGCTATTATAGGAGGC  
TTCGTCCATTGATTCCCATTATTTTCGGGCTATACACTTAATAATACATGAGCAAAAATTAC

TTGTAATTATATTTGTTGGAGTCAATATAACATTCTTCCCCCAGCACTTCCTAGGTCTATCA  
GGTATGCCTCGACGATATTCTGATTATCCAGACGCCTATACAGCATGAAACACAGTGTCTTC  
AATGGGTTCATTTCATTTCACTAACAGCAGTTATGTTAATAATTTTCATAATTTGAGAAGCCTT  
CGCATCTAAACGAGAAGTGGCAGTGATTGAGCTTACTACAATAATATTGAATGGCTCCACG  
GATGTCCTCCCCCATAACCATAACATTCGAAGAGCCCCGCCTACGTCATACTGAAATAAGAAAGG  
AAGGAATCGAACCCTCTAGAATTGGTTTTCAAGCCAACATCATAACCACTATGTCTCTCTCAA  
TAAAGAGGTATTAGTAAAAATTACATAACTTTGTCAAAGTTGAATTATAGGTGAAAATCCTT  
TATATCTCTATGGCGCATCCCTTTCAAACAGGCCTTCAAGATGCAACTTCCCCCATCATGGAA  
GAACTCCTACACTTCCATGATCATACTAATAATTGTATTCTTAATTAGCTCCTTAGTTCTC  
TATATCATTTCAATTATATTAATACTACTAAATTAACACATACAAATACAATAGACGCACAAGA  
AGTGGAGACAGTATGAACTATTCTACCAGCTATCATCTTAATTATAATTGCACTTCCATCACT  
ACGAATTCTTTATATGATAGATGAAATTAATAGCCCATCATTAAGTGTAAAGACTATGGGGC  
ATCAATGATACTGAAGCTATGAGTATACAGATTATGAAGACTTGAGCTTCGATTCTTATATA  
ACCCCAACACAAGAATTAAGCCCGGAGAGCTGCGATTACTAGAGGTAGATAATCGAGTAG  
TACTACCCATAGAAATAACAATTCGCATATTAATTTCTCAGAAGATGTGCTACATTTCGTGA  
GCTGTCCCATCTCTAGGACTAAAACTGATGCAATCCCGGGGCGATTAAATCAAACAACCTCT  
TATGGCCATGCGACCAGGACTATATTATGGCCAATGCTCAGAGATTTGCGGTTCTAATCATA  
GCTTTATACCCATTGTACTTGAAATAGTTCCGCTGTCTTACTTTGAAAAATGATCCGCTTCAA  
TACTATAAAATCATTAAAGAAGCTTTATAGCGTTAACCTTTTAAGTTAAAGACTGAGAGTGCA  
AGTCTCTCCTTAATGGAAATGCCACAATTAGACACATCCACATGATTTATTACAATCCTATCC  
ATGATCTTAACACTATTTATTATATTTTCAGTTAAAAGTCTCAAAACACAACCTATCCTGAGTTT  
CCTGAATTA AAAACAACCCCACTATCAAAAAAACCTATGCCTTGAGAAGAAAAATGAACGA  
AAATCTGTTTCGCTCTTTTACTACCCCAATGATAATAGGAGTACCAATTGTGGTTCTGATTAT  
TATTTTCCCAAGTATCTTATTTCCCTCACCTAATCGATTAATCAATAACCGCCTAGCTACTGT  
CCAACAATGATTAATTCAATTAGTATCTAAGCATATACTGTCTATTACAAATTATAAAGGAC  
AAACCTGAGCGCTAATACTAATGTCATTAATTTTATTTATTGGCTCAACTAACCTTTTAGGCC  
TATTACCACATTCATTACACCTACTACACAACCTATCAATAAAATTTAGGAATGGCCATTCTC  
TGTGAGCAGGTACAGTAGTTATAGGATTTTCGACACAAAACCTAAGGCATCTCTGGCCCACTTT  
CTACCCCAAGGAACACCTCTTCCTCTGATCCCAGTGTTAGTAATTATCGAGACAATTAGTCTG  
TTTATTCAACCTGTGGCCCTAGCTGTACGACTGACCGCTAATATTACTGCAGGCCATCTACTT  
ATTCATTTAATCGGAGGGGCTACCCTAGTTTTTAATAAACATTAACCTGTAAACAGCCCTAATT  
ACCTTTATTATTCTTATTCTACTTACTATTCTCGAATTAGCTGTAGCTCTTATCCAAGCCTATG  
TTTTACCCCTACTAGTTAGTCTATACTTACATGATAATACCTAATGATCCACCAACACATGC  
ATATCATATAGTTAACCAAGCCCATGGCCACTTACAGGAGCTCTCTCGGCTCTTCTTATAAC  
ATCAGGACTAATTATATGATTTCACTTTAACTCGGTATACTTACTAATACTAGGCCTCACCAC  
CAACATACTTACCATGTACCAATGATGACGAGATATCGTCCGGGAAAGTACCTTCCAAGGCC  
ATCACACCCCAATCGTCCAAAAAGGACTACGATATGGAATAGTCTTATTTATTGTATCAGAA  
GTATTTTTCTTCGCGGGGATTCTTTTGGGCCTTCTACCACTCAAGCCTAGCACCTACTCCTGAA  
TTAGGAGCATGTTGACCACCTACAGGTATCATCCCCTTAAATCCGCTAGAAGTTCCACTACTT  
AACACCTCTGTACTTCTAGCATCTGGGGTATCTATCACTTGAGCTCATCATAGTCTAATAGAA  
GGAGACCGTAAACATATGCTCCAAGCCCTATTTATTACTATTTCACTAGGAGTTTATTTTACA  
CTTCTACAAGCCTCAGAATACTATGAGACATCCTTTACTATTTTCAGATGGAGTGTATGGTTCA  
ACCTTCTTTATAGCAACTGGATTTTCATGGGCTTCATGTAATTATTGGTTCAACTTTTCTTACTG  
TGTGTTTTCTACGACAACCTGCACTTTCACTTTACATCCAACCATCACTTTGGCTTTGAAGCGG  
CAGCATGATACTGACACTTCGTAGACGTTGTATGGCTTTTCCTTTATGTTTCTATTTACTGAT  
GAGGATCCTACTTCTTTAGTATTAATACTAGTACGATTGACTTCCAATCAATAGGCTCTGGTACA  
AGCCAGAAAGAAGTAATAAACCTAATTCTAGCACTTCTAACCAACGTATTATTAGCCTCTCT  
GCTCGTTCTTATTGCATTCTGACTGCCACAACCTAAATATCTATGCAGAAAAAGTAAGTCCTTA  
TGAATGTGGATTTGATCCTATAGGATCAGCACGCCTTCCTTTCTCTATAAAATTTTTTCTAGT  
AGCTATTACATTCCTTTTATTCGACTTAGAAATTGCTCTACTCCTCCCGCTTCCTTGAGCATT  
CAGACTAACAACCTAATAACTATGCTTATTATAGCTCTATTACTCATTTCCTATTAGCCGCA

AGCCTAGCTTATGAGTGAACCGAAAAGGGGCTAGAATGGGCCGAATATGATAATTAGTTTA  
AACTAAAATAAGTGATTTCGACTCACTAGATTATGACTAACATCATAATTATCAAATGTCTG  
TGGTCTATATTAATCTCTTTCTAGCCTTTACTATATCCTTAATAGGGCTACTCATCTACCGATC  
CCATTTAATATCCTCCCTATTATGCTTAGAAGGCATGATGCTGTCACTATTTGTTATACTAAC  
AGTAACAATCCTAAGTAACCACTTCACACTAGCCAGTATGACTCCAATCATTCTATTAGTATT  
CGCTGCCTGTGAAGCAGCGTTGGGGCTTTCTCTGCTAGTAATAGTCTCTAATACCTATGGAA  
CTGACTACGTACAAAATCTTAACCTCCTACAATGCTAAAAATTATCCTCCCTACCATAATACT  
AGTACCCCTTACATGAATATCAAAGCCTAACATAATCTGAATTAATACAACAACCTATAGTC  
TACTCATCAGCCTTATTAGTCTGACATATCTCAATCAACTCAGTGATAATAGTCTAAACTTCT  
CATTAACATTCTTTACCGACTCCCTATCAGCCCCCTGTTAGTTCTCACAACATGACTACTGC  
CCTTAATACTTATAGCTAGTCAATTTACCTGTCAAAAGAGACCCTGACCCGGAAAAAATTA  
TATATCACAATACTAATTCTCCTGCAACTATTCTTAATTATAACATTTTCCGCTACTGAGTTA  
ATCATATTCTATATTTTATTTGAAGCTACCCGGTACCGACTTTAGTTATCATTACTCGATGA  
GGAAACCAAACAGAACGACTAAACGCGGGCCTCTATTTTTTATTCTACACCTTAGTAGGATC  
CTTGCCCTTACTAGTTGCACTGTTATATGCCCAAAACAGCTTAGGATCACTAAATTTTCTCAT  
AGTACAGTACTGAACTCAGCCCTTGCCAAATTCCTGATCTAACATTTTCATGTGGCTGGCATG  
TATAATAGCATTTCATAGTAAAAATACCGCTATATGGCTTACACCTATGACTACCCAAAGCAC  
ATGTAGAAGCTCCTATTGCAGGATCCATAGTACTTGCTGCAGTACTTCTAAAACCTAGGGGGA  
TACGGGTATAATGCGGATTACAACAATACTCAACCCCTCTAACAAATTTTATAGCCTACCCCTTC  
ATAATGCTCTCACTATGAGGAATAATCATAACAAGTTCTATTTGTTTACGCCAGACAGACCT  
AAAGTCCCTAATTGCATACTCCTCTGTTAGTCACATAGCCCTAGTCATTGTAGCAATTCTAAT  
CCAATCCCCATGAAGCTACATAGGAGCTACTGCTCTAATAATCGCCCATGGGTAAACATCTT  
CTATGCTATTCTGTCTTGCAAACCTCTAACTACGAGCGAACCCATAGCCGAACCTATAATTCTCG  
CACGGGGCTTGCAAACGCTTCTTCCACTTATAGCAGCTTGATGACTATTAGCAGGCCTAACT  
AACTTAGCTCTTCCTCCTACAATTAATCTGATTGGGGAAGTGTGTTAGTGTATAGCCACATTT  
TCATGATCCAATATTACCATTCTCTTAATAGGAGTTAACATTACCATTACTGCTCTCTACTCT  
CTATATATACTAATTTCTACACAGCGAGGCAAGTATACAGACCACATCAAAAATATTAAGCC  
ATCTTATACACGAGAAAAATGCCTTAATAGCCTTACATTTACTACCCCTTTTACTTCTATCTCTT  
AACCCTAAAGTAGTTCTAGGCTTTATTTACTGTAAATATAGTTTAAACAAAAACATTAGATTGT  
GAATCTAGTAATAAAAGCTTAAATCTTTTTATTTACCGAAAAAGCATGCAAGAACTGCTAAT  
TCATGCACCCATGCATAAAATCATGGCTTTTTCAACTTTTAGGGGATAGAAGTAATCCATTG  
GTCTTAGGAGCCAAAAAATTGGTGCAACTCCAAATAAAAGTAATTAACCTACTTACCTCCTT  
CACCATTACAACCCTATTTATATTAATCATGCCATTATCCTAACCTGTACCCCAGCATATGA  
AAATAAACTTTACCCGCAATATGTAAAAACCACAGTCTCTTATGCCTTCACAATTAGCATAA  
TTCCCATAGTAATATTCATCCACTCCGGACAAGAAGCAATCATCTCAAACCTGACACTGAATA  
ACCATCCAAACCCTAAAACCTCAGTCTAAGCTTCAAATTAGATTACTTTTCAATAATCTTCGTA  
CCAGTGGCCCTATTCGTCACATGGTCAATTATAGAATTCTCTATATGATATATACACGCAGAT  
CCTAACATTAACCGATTCTTTAAATATCTACTTATATTCCCTCGTCACGATAATAATTCTAGTA  
ACCGCAAATAATCTATTTTCAGCTATTTCATCGGCTGAGAGGGAGTAGGAATCATATCATTCT  
CCTCATTGGATGATGATATGGACGAACAGATGCTAATACGGCTGCCCTACAAGCAGTACTAT  
ACAACCGCATTGGAGATGTTGGTTTTATCATGGCCATAGCTTGATTCTTACTCAATACAAATG  
CATGGGACTTCCAACAAATCTTTATAATCGAACATAAAAAACCTCAATATTCCACTGGCAGGA  
CTACTTCTAGCAGCTACCGGAAAGTCTGCCCAATTTGGACTTCATCCATGACTCCCATCAGCC  
ATAGAAGGCCCCACTCCTGTCTCAGCACTACTTCACTCTAGCACAATAGTAGTAGCAGGCGT  
ATTTCTTCTAGTCCGATTTACCCCTTAATAGAACATAACAAGACAATTCAAACGGTTACCCT  
ATGCTTAGGGGCAATAACAACCTTGTTTACAGCAATCTGCGCCCTTACCCAAAATGATATCA  
AAAAAATTATTGCCTTCTCCACCTCGAGCCAACTAGGACTAATAATTGTAACAATTGGTATT  
AATCAGCCTCATCTGGCCTTTCTCCATATCTGCACGCACGCATTCTTCAAGGCCATGCTATTT  
CTATGCTCCGGATCTATTATTCATAGTCTAAACAACGAACAAGATATTCGAAAGATAGGAGG  
GCTATTTAAAAGTCTACCATTTACCACTACTGCTCTAATCATCGGAACTCTAGCACTTACAGG  
AATGCCCTTCTTAACAGGATTTTACTCCAAAGACTTAATTATTGAAACCGCCAATACGTCAT

ACACCAACGCCTGAGCCTTACTAACAACCCCTTATCGCCACATCCATAACTGCCGCCTACAGT  
ACTCGAATTGTATTTTTTACACTTCTAGGACAACCTCGCTATAGTCCCATTATCACCATTAAC  
GAGAATAACCAGTTCCTGACTAACTCTGTCAAACGATTGCTACTAGGAAGTATCTTTGCGGG  
ATTCTAATCTCTCATAACATTACACCCACCACTGTCCCACAAATAACCATGCCCTGTCACCT  
AAAAATGATAGCCCTTACAGTAACAATCCTAGGCTTTATTCTAGCACTAGAACTTAACCTAG  
CCATACAAAATCTCAAATTTGACTACCCGTTAAGCACGTTCAAATTTTCAAATCAACTAGGA  
TATTTCCCTACTACTCTGCATCGTCTCGCACCAATAATAGGTCTATCAATAAGCCAAAAAAC  
AGCATCCATACTGCTAGATGCAATCTGACTAGAGAATGTTCTACCAAAGTCCATCTCCTACT  
TTCAAATAAAATCCTCAATCACAGTCTCCAACCAAAAAGGGACTAATTAACCTATACTTTCTC  
TCCTTTATAATTACACTAATCTTAAGTCTCTTTATACTTAATTTCCACGAGTGACTTCCATAAT  
TACCAATACACCAATAAGGAGAGATCATCCAGTAACAATAACTAATCAAGTACCATAACTA  
TATAAAGCTGCAATTCCCATAGCCTCTTCACTAAAAAATCCTGAATCCCCTGTATCATAAATC  
ACCCAATCTCCTATTCCATTAACTTAAATACTACCTCGGCTTCATCATCCTTTAAATATAA  
CAAACAGCCAGTAACCTCAGACAACAGACCTACAATAAATGCACCTAGTACAGCCTTATTAG  
AAAGTCAAACCTCAGGATATTGCTCAGTGGCTATGGCCGTAGTGTACCCGAACACTACAAGT  
ATACCCCTAAATAAATTAATAAAGACCATTAACCCCAAAAAGATCCTCCAAAGCTTAACA  
CAATACCACACCCTACACCCCACTAACAATCAAGACTAAACCTCCGTAGATAGGAGAGGG  
CTTAGAAGAAAACCCCGCAAACTAACTACAAAAACGATACTTAAAATAGATACAATGTAT  
GTTATCATCATTCTTACATGGAATCTAACCATGACCAATGACATGAAAAATCATCGTTGTATT  
TCAACTATAAGAACCCCAATGATCAACATCCGAAAAACTCATCCATTAGTTAAAATTGTCAA  
CAACTCATTGACCTTCCAACACCATCAAACATTTCAACATGATGGAACCTTTGGGTCCCT  
GTTAGGAGTGTGTCTGATCTTGCAAATCTTAACAGGCTTATTTCTAGCCATACACTATACATC  
AGATACAGCTACAGCCTTTTCATCAGTCGCACACATTTGTGAGACGTCAACTATGGTTGAT  
TTATCCGATATATACATGCCAATGGGGCCTCTATATTTTTTATCTGCCTATTTATACACGTAG  
GGCGAGGCTTATACTATGGATCATACCTATTTCCAGAGACATGGAATATCGGAATTATTCTC  
CTACTTACAGTTATAGCCACAGCATTATAGGATATGTACTACCTTGAGGACAAATATCCTT  
CTGAGGAGCAACCGTCATTACTAACCTACTATCAGCAATTCCTTACATTGGCACTAATCTAG  
TGGAGTGAATCTGAGGGGGTTTCTCCGTAGATAAAGCAACACTAACCCGATTTTTTGCTTTTC  
ACTTTATCCTTCCATTTATCATCTCAGCACTAGCAATAGTCCATCTATTATTCCTTCACGAAA  
CAGGATCTAATAACCCCTCCGGAATTCCATCTGACCCAGACAAAATCCCATTTTACCCCTAT  
CATACAATTAAGACATCCTAGGCGTCCTATTTCTTGTCCTCGCCTTAATAACTCTGGCTTTA  
TTCTCACCAGACCTGTTAGGAGACCCTGATAACTATACCCCTGCAAACCCACTAAGTACCCC  
GCCACATATTAAGCCTGAATGGTACTTTCTATTTGCCTACGCTATCCTGCGATCTATCCCTAA  
TAACTAGGAGGGGTGCTAGCTCTAATCTTCTCTATTCTAATTCTAACTATTATTCCTACTATT  
ACATACATCCAAACAACGAAGCATGATATTCCGACCTCTAAGTCAATGCTTATTCTGACTCC  
TAGTAGCAGACCTACTCACACTAACATGAATTGGAGGACAGCCAGTAGAACACCCCTTCATT  
ATTATTGGGCAATTGGCCTCTATTCTCTACTTTACAATTCTTCTAGTACTTATACCTATCACTA  
GCATTATTGAGAATAGCCTCTCAAAATGAAGAGTCTTTGTAGTATATTAATTACTTTGGTCTT  
GTAAACCAAAAACGGAGATTCTCTACTTCTCCCTAAGACTCAAGGAAGGAGCAACAACCC  
CACTACCAGCACCCAAAGCTGGTGTCTACTTAACTATCCCCTG

>SRR6109212 Circular ReOrganized

GTACATACCATTATTTCACTTTATGTCCTATTTATTTTCATATATATCATTCCATGTACTGTACC  
ATCACAGTATGTTCTCGAATACTTTCTCCTTTGTTTTTTTCCCCCCTATGTATATCGTGCATT  
AATGGCGTGCCCCATGCATATAAGCATGTACATACTGTGCTTGGCTTTACATGAGGACTTAC  
GTTCCGAAAAGTTTATTTTCAGGCGTATAGTCTGTAAGCATGTATTTCACTTAGTCCGGGAGCT  
TAATCACCAGGCCTCGAGAAACCAGCAATCCTTGCGAGTACGTGTACCTCTTCTCGCTCCGG  
GCCCATGGAATGTGGGGGTTTCTATGTTGAAACTATACCTGGCATCTGGTCTTACCTCAGG  
GCCATGATAGCTCTAGATTCCAATCCTACTAACCCTTCAAATGGGACATCTCGATGGACTAA  
TGACTAATCAGCCCATGATCACACATAACTGTGGTGTGCATGCATTGGTATCTTTTAATTTTT



AGGGGGGGAACCTTGCTATGACTCAGCTATGACCGTAAAGGTCTCGTCGCAGTCAAATAATTT  
GTAGCTGGGCTTATTTATCTTTCACGGGTCTGGGCATAGATACCCATAAGGGGGCTATTAGTC  
AATGGTTACGGGGCATATAGTATGTAAATACCACTGAATCGAACGAACACGCACGTGTACG  
CACGTGTACGCATATGTACGCATATGTACGTACGTGTACGCACGTGTACGTACGTGTACGTA  
CGTGTACGTACGTGTACGCACGTGTACGCACGTGTACGCACGTGTACGCACGTGTACGCACG  
TGTACGCACGTGTACGCACGTGTACGCACGTGTACGCACGTGTACGCACGTGTACGCACG  
TTAATCAAACCCCCCTTACCCCCGTAACCTCAAGGAGCTTACGCACATTTATGATTGTCCTG  
CCAAACCCCAAAAACAAGACTAAATGCACGTGCAAACATGAAGCTATTACACCCAAAATCC  
CACATAATAAGCTAAAATTCCCAGCCAAATAATCACTACAATCACAGGCATGAGACTTTAAA  
TTAAGATCTATCTATAGATATTTTTTTTTTTTACTCTGTCTCCCTCCTATTGATTTTTCCGTTATT  
ATCACTTTTTTAGCCACGAGCTTCTACTAAATTATCCCATATAAATCCCAAAACCAACCGCGT  
TTATGTAGCTTAATAATAAAGCAAGGCACTGAAAATGCCTAGACGAGTTGTATAACCCCAT  
AACATAAAGGTTTGGTCCTAGCCTTCCCATTAGCTATTAACAAGATTACACATGTAAGTCTC  
CGCGCTCCAGTGAAAATGCCCTTTGGATCTTAAAGTGATCTGAAGGAGCGGGCATCAAGCAC  
ACCTTCCCCGGTAGCTTATAACGCCTTGCTCAGCCACACCCCCACGGGATACAGCAGTGAT  
AAAAATTAAGCCATAAACGAAAGTTTGACTAAGCTATGTTGATTAAAGGGTTGGTTAATTTT  
GTGCCAGCCACCGCGGTTATACGATTGACCCAAGTTAATAGGCCACGGCGTAAAGCGTGTG  
AAAGAAAAAAATTTTTCCCCATTAAAGTTAAAGTTAATCAAGCTGTAAAAAGCTACCAATA  
ACACTAAAATAGACTACGAAAGTGACTTTAATACTCTCAACCACACGACAGCTAAGATCCA  
AACTGGGATTAGATACCCCACTATGCTTAGCCTTAAACATAAATAATTTATCAAACAAAATT  
ATTGCCAGAGAACTACTAGCAACGGCTTAAAACTCAAAGGACTTGGCGGTGCTTTAAACCC  
CCCTAGAGGAGCCTGTTCTGTAATCGATAAACCCCGATAGACCTCACCACCCCTTGCTAATC  
CAGTCTATATACCGCCATCTTCAGCAAACCTTAAAGGAAAAAGAGTAAGCACAATCATCT  
TGCATAAAAAAGTTAGGTCAAGGTGTAACCTCATGGGATGGGAAGAAATGGGCTACATTTTCT  
ATTCAAGAACAACCTACGAAAGTTTTTATGAACTAAAACTAAAGGTGGATTTAGTAGTAA  
ACCAAGAATAGAGAGCTTGTTGAATAAGGCAATGAAGCACGCACACACCGCCCCGTCACCC  
TCCTCAAGTGGCACAAGTCAAATATAACCTATTAACCAAAATAAAACGCAAGAGGAGACA  
AGTCGTAACAAGGTAAGCGTACTGGAAAGTGTGCTTGGATAAACCAAAAGTGTAGCTTAAAC  
AAAGTATCTGGCTTACACCCAGAAGATTTACGTATGTGACCGCTTTGAGCCCAGAGCTAGC  
CCAGACAATAACCGATTAAACTACCACAGGCCAATTAAATAAAACATTAGTAGCGCAATT  
AAAGTATAGGAGATAGAAATTTCTTAGATCGGAGCTATAGAGAAAGTACCGCAAGGGAACG  
ATGAAAGATTACCCAAAGTGATAAACAGCAAAGATTACCCCTTCTACCTTTTGCTAATGAG  
TTAGCCAGAAATAACCTAACAAAGAGAACTTAAGCTAGGTCCCCGAAACCAGACGAGCTA  
CCTATGAACAATCCACTGGGGTAAACTCATCTATGTTGCAAAATAGTGAGAAAGATTTGTAGG  
TAGAGGTGAAAAGCCTAACGAGCCTGGTGATAGCTGGTTGCCCAGAATAGAACTTCAGTTC  
AACTTTAACTTGCCTACAAAACCTTAGATAATTTTAATGCAAGTTTAAAAATATATTCTAAAA  
AGGTACAGCTTTTTAGAAATCAAGGATACAACCTTACTTAGAGAGTAAATACTGATTAAACCA  
TAGTAGGCCTAGAAGCAGCCATCAATTAAGAAAGCGTTTAAGCTCAACATCCATATCAACTT  
AATACCAAAAGTATTTAATCAACTCCTAATATAACAACTGGGCTAATCTATTTTAATATAGA  
AGCAATAATGCTAATATGAGTAACGAGAGATACCTCTCCAACGCATAAGCCTATAACAGCA  
ACGGATAACCACTGATAGTTAACAACAACGTAGAAATAACCAACAATAAAACATCTACCA  
AACCAATTGTTAATCCAACACAGGTATGCGACTAAGGAAAGATTAAAAGAAGTAAAGGAA  
CTCGGCAAAACAAAATCCCGCCTGTTTACCAAAAACATCACCTCCAGCATTCCAGTATTGG  
AGGCACTGCCTGCCCGGTGACATTAGTTAAACGGCCGCGGTATTCTGACCGTGCAAAGGTAG  
CATAATCATTTGTTCTCTAAATAAGGACTTGTATGAAAGGCCACACGAGGGTTTAACTGTCT  
CTTACTTCCAATCAGTGAAATTGACCTTCCCGTGAAGAGGCGGGAATAAAACAATAAGACG  
AGAAGACCCTATGGAGCTTTAATTAAGTCTCAAAAGAATCTATCTACCAGACCGACAGG  
AACAACATACTCCTTCCATGAGCTAACAATTTAGGTTGGGGCGACCTCGGAGCATAAAACAA  
CCTCCGAGTGATATTAATCTAGACGTACCAGTCAAAATGCTCACTTACTTATTGATCCAAAA  
ACCTCTTTGATCAACGGAACAAGTTACCCTAGGGATAACAGCGCAATCCTATTTAAGAGTCC  
ATATCGACAATAGGGTTTACGACCTCGATGTTGGATCAGGACATCCTAATGGTGCAGCAGCT

ATTAAGGGTTCGTTTGTTC AACGATTAAAGTCCTACGTGATCTGAGTTCAGACCGGAGCAAT  
CCAGGTCGTTTTCTATCTATTTAAACAACCTCTCCCGGTACGAAAGGACAAGAGAAGTAAGG  
CCTCCCTCACTGAGGCGCCTTAAGACCAATAGATGATTTAATCTAAATCCAGTAAGTCTATC  
CCCAATACTGCCCAAGAGACAGGGCTTTGTTAGGGTGGCAGAGCCCGGTGATTGCATAAAA  
CTTAAACCTTTATATTCAGGGGTCAAATCCTCTCCCTAACATTATGTTTATAATCAACACTA  
TCTCACTAGTTGTACCCATTCTCCTTGCCGTAGCCTTCTTAACACTAGTAGAGCGAAAAATAC  
TAGGCTATATACAACCTTCGTAAAGGACCAAACATTGTAGGGCCCTACGGTCTCCTACAACCT  
GTCGCAGATGCTGTAAAACCTTTTCACCAAAGAGCCTCTACGCCCACTCACATCATCTGCGAC  
TATATTCATTATGGCCCCTATTCTGGCTCTAACACTGGCCCTAACCATGTGAATTCCTCCTACC  
AATGCCATATCCCCTTGTCATATAAACCTCGGAGTACTATTCATACTAGCAATATCAAGCC  
TAGCTGTATACTCTATCCTTTGATCAGGATGAGCTTCAAATTCAAAATACGCTCTGATCGGA  
GCCCTACGGGCCGTAGCCCAGACAATTTCATATGAAGTCACATTAGCTATTATCCTCCTATC  
AGTCCTACTAATGAATGGCTCATTGCGACTTTCCACTTTAATTACTACTCAAGAGCACCTCTG  
ACTAATCTTCCCTGCATGACCCCTAGCCATGATATGATTTATTTCCACCCTAGCAGAACTAA  
CCGAGCCCCCTTCGACCTAGCAGAAGGAGAATCAGAACTGGTCTCAGGTTTTAACGTTGAGT  
ACGCGGCAGGTCCGTTTCGCCCTATTTTTCTAGCAGAATATACTAATATCATTATAATAAATG  
CCCTCACGACTATCCTGTTCTTCGGGGCATTTCATAATCCCTACATACCAGAACTGTACACTG  
TCAACTTCACCGTAAAAACACTACTCTTAACAGCTTCCTTCCTATGAATCCGTGCATCATATC  
CCCGATTCCGATATGACCAACTAATGCATCTACTATGAAAAAACTTCCTACCCCTTACACTA  
GCCCTATGCATGTGACATGTAACACTACCCATTATCACAGCAAGCATTCCCCCCCCAAATATA  
AGAAATATGTCTGACAAAAGAATTACTTTGATAGAGTAAATAATAGAGGTTGGAATCCTCTT  
ATTTCTAGAATTATAGGAATTGAACCTAATCCTAAGAAGCTCAAAAATCTTCGTGCTACCTAA  
TTACACCATATCCTAAAGTAAGGTCAGCTAAATAAGCTATCGGGCCCATACCCCGAAAATGT  
TGGTTTATCCCCTTCCCGTACTAATTAACCTCCCATTCTTATCATTATCACATCCACCATTGT  
CCTAGGAACCATAATCGTTTTATTAGCTCCCATTGACTCATAATCTGAATTGGCTTTGAAAT  
AAATATACTAGCTATTATCCCAATCCTAATGAAAAAATTTAACCACGAGCCATAGAAGCCT  
CTACAAAATATTTCTCACACAAGCCACTGCATCCATGCTTCTAATACTAGGCATTATTATCA  
ACCTACTACACTCAGGGCACTGAACAGTCTCAATAATCCCTAACCCAATCGCATCAACCGTA  
ATTACCATTGCCCTAGCAATAAACTCGGCCTATCCCCCTTCCACTTCTGAGTCCCAGAAGTC  
ACACAAGGCGTTCCTTTATCCTCAGGAATAATTCTACTAACATGACAAAAAATCGCACCTCT  
ATCCGTCTTATATCAAATCTCACCATCCATCAACCCAAACCTACTGGTAGCAATAGCCGCCA  
CATCCGTATTAGTAGGGGGCTGAGGAGGACTAAACCAAACCTCAACTTCGAAAAATCCTAGC  
ATACTCTTCAATCGCTCACATGGGCTGAATAGCCGCCATCATAGTATACAACCCCACTCTAA  
TAATCCTTAACCTTGCAATCTATATCATAATAACTCTGGGGACATTCTACTATTTATGCACA  
GCCTATCCACAACAACACTATCACTGTCCCATACATGAAATAAACTACCACTAACTGCCTCA  
CTAATTCTAGCACTTATATTATCACTAGGCGGCCTCCCTCCCCTCTCAGGCTTCATCCCCAAA  
TGAATAATTATTCAAGAACTAACAAAAAATGATATAATCGTCATGCCACATTCATAGCCAT  
CACAGCCTTACTAAATCTTTATTTTTACATGCGTCTAACATACGCCACAGCATTAAACAATATT  
CCCCCTCAGCAAATAACATAAAAAATAAAATGACAGTTTGAAAGCACAAAAAAAATAATTCTC  
TTGCCCCCTCTAATCGTAGCATCAACCATACTCCTCCCACTAACTCCATTACTATCAATCATG  
GACTAGAGATTTAGGCTAAAAAGACCAAGGGCCTTCAAAGCCCTAAGTAAGTGAAACCCAC  
TTAATCTCTGCAATTATCTAAGGACTGCAAGAACATATCTCACATCAATTGAACGCAAAACA  
ACCGCTTTAATTAAGCTAAGCCCTCCTAGATTGGTGGGCTTTTATCCCACAAAATTTTAGTTA  
ACAGCTAAAAACCCCAAACAACCTGGCTTCAATCTACTTCTCCCGCCGCGTGGGAAAAAAG  
GCGGGAGAAGCCCCGGCAGAATTGAATCTGCTTCTTTGAATTTGCAATTCAATATGATTATT  
CACCACAGAGCTTGGCAAAAAGGGGACTCAACCTCTATTCTTAGATTTACAGTCTAGTGCTT  
TTATCAGCCATTTTACCTATGTTTATAAACCGATGACTATTCTCTACAAATCATAAAGATATT  
GGCACTCTCTATCTTCTATTTCGGTGCATGAGCCGGAATAGTAGGTACTGCTCTCAGCCTTTTG  
ATTTCGTGCCGAACCTAGGTTCAGCCCGGGACCCTGTTGGGGGATGATCAGATCTACAATGTAGT  
CGTAACTGCCCATGCATTCGTGATAATCTTCTTTATGGTTATGCCTATTATAATTGGGGGGTT  
TGGGAACTGATTAGTGCCCTTAATAATTGGTGCTCCTGACATAGCGTTTCCTCGAATGAATA

ACATAAGCTTCTGACTGCTGCCACCATCTTTCTTGTTGCTTCTAGCTTCTTCTATAGTAGAAG  
CAGGTGCAGGAAGTGGGTGGACTGTCTACCCCCCTCTAGCGGGCAATCTGGCCCATGCAGGA  
GCATCAGTAGACCTAACAATCTTTTCTCTACACTTAGCAGGCATCTCTTCTATTCTGGGAGCC  
ATCAATTTTCATCACTACTATCATTAAACATAAAACCTCCTGCAATATCTCAATACCAAACCCCT  
CTGTTTGTGTGATCAGTCCTAATCACGGCAGTGCTTCTTCTTTTATCTCTGCCAGTCTTGGCG  
GCTGGGATTACCATACTACTTACAGATCGAAACCTCAACACTACCTTTTTTGACCCAGCCGG  
AGGGGGAGATCCTATTCTGTACCAACACTTGTTTTGATTCTTCGGACACCCTGAAGTTTATAT  
CCTAATTCTTCCAGGGTTCGGAATGATCTCTCACATTGTCACTTATTACTCAGGAAAAAAG  
AGCCTTTTCGGCTACATGGGTATAGTCTGAGCGATAATATCCATTGGATTCTTAGGATTTATCG  
TGTGAGCTCATCATATGTTTACCGTAGGTATAGATGTCGACACACGAGCTTACTTCACTTCAG  
CTACCATAATTATTGCAATCCCAACAGGAGTCAAAGTATTTAGCTGACTAGCTACCCTGCAC  
GGAGGGAATATTAATGATCTCCTGCTATAATATGAGCCCTAGGCTTTATTTTTCTGTTTACA  
GTAGGGGGCCTTACAGGAATTGTCTAGCTAATTCGTCTCTAGACATTGTCTCCATGACAC  
ATATTATGTGGTAGCCCATTTCCACTATGTGCTGTCAATAGGAGCTGTCTTTGCCATTATAGG  
AGGATTTGTCCACTGATTTCCGCTGTTTTCAGGCTATACACTTAATAATACATGAGCAAAGAT  
TCACTTCATAATCATATTCGTTGGGGTTAATATAACTTTCTTTCCCCAACATTTCTGGGCCT  
GTCGGGAATGCCTCGGCGATATTCCGACTATCCAGATGCCTACACAATATGAAATACAGTAT  
CTTCTATAGGCTCATTCAATTTACTAACAGCAGTTATACTAATAATTTTCATGATTTGGGAGG  
CCTTTGCATCAAAGCGAGAGGTAGCAGTGGTAGAACTCACTTCAACCAATATTGAATGACTA  
CATGGATGTCCTCCTCCGTACCATAACATTTGAAGAACCCGCTTACGTTATACTAAAATAAGA  
AAGGAAGGAATCGAACCCCTCTGGAATTGGTTTCAAGCCAATATCATAACCACTATGCCTCTC  
TCAATAAAGAGATATTAGTAAAAATTACATAACTTTGTCAGGGTTAAATTATAGGTGAAAT  
CCTTTATATCTTTATGGCATATCCCTTCAAATAGGTCTTCAAGACGCAACTTCTCCTATCAT  
GGAGGAACTCCTACATTTTCATGACCATACTAATAAATTGTATTCTAATTAGCTCCTTAGT  
TCTCTATATTATTTCAATTATATTAAGTCCAAATTAACACACACAAATACAATAGATGCAC  
AAGAAGTAGAGACGGTATGAACCATCTTGCCGGCTATTATTCTAATTCTAATTGCACTCCCA  
TCGCTACGGATTCTTTATATAATAGATGAAATCAATAACCCCTCACTGACCGTAAAAACCAT  
GGGCCATCAATGATATTGAAGTTACGAGTATACAGATTACGAAGATCTGAGCTTTGACTCTT  
ATATAACCCCAACACAAGAATAAAACCTGGAGAACTGCGACTATTAGAAGTGGACAATCG  
AGTAGTACTGCCCATAGAAATAACGATCCGTATGCTGATCTCATCAGAAGATGTCTTGCACT  
CATGGGCTGTGCCATCCCTAGGATTAAAAACTGATGCAATCCCAGGACGGCTAAACCAAAC  
AACTCTCATAGCTATACGACCAGGATTATATTACGGCCAATGCTCAGAAATTTGTGGCTCCA  
ATCACAGTTTTATACCTATTGTTCTCGAGCTAGTTCCACTATCTTACTTTGAAAAATGGTCTG  
CCTCGATACTATAGAATCATTAAGAAGCTAATATAGCGTTAACCTTTTAAAGTTAAAGACTGA  
GAATGCAGACTTCTCCTTAATGAAGATGCCACAACCTAGACACATCAACATGATCTATCAAA  
TCCTATCTATAGTTCTAGCACTATTCATTATATTCCAGTTAAAGATCTCAAAATATAAATACC  
CCGAAACCCCCGAACCGAAATCCCTTACCATCAAAGAAACGTATACCTTGAGAAGAAAA  
ATGAACGAAAATCTATTCACCTCTTTTATTACCCCGATGATAATGGGGGTTCCCATTTGTAGTC  
TTAATCGTTATGTTTCCGAGCATTTTATTCCCTTCTCCAGTCGACTGATCGACAATCGCTTA  
GTGTCTATTCAACAATGACTAGTCTGGCTAACATCAAAACAAATGCTATCCATTCAATAATCG  
TAAAGGGCAAACCTGAGCACTAATGTTGATATCCCTAATCCTATTTATTGGCTCAACTAATCT  
TCTGGGTCTATTGCCACACTCATTACACCTACCACGCAACTGTCAATGAATCTGGGAATGG  
CCATTCCTTGTGAGCAGGTACAGTTGCCACTGGATTTCGATATAAGACCAAAGCATCCTTA  
GCTCACTTTCTACCTCAAGGAACACCTTCCCTCTAATCCCTATACTTGTTATTATCGAAACA  
ATCAGTCTATTATCAACCTATGGCCTTAGCCGTACGATTAAGTCTAATATTACTGCAGGT  
CACTTGCTCATCCATTTAATTGGAGGGGCTACTCTAGCTCTAACAAGTATTAGCACTATTACA  
GCCCTTATCACCTTTATTATTCTAGTGCTACTTACTATTCTCGAGTTTGCTGTAGCCCTCATTC  
AGGCCTACGTCTTTACCCTGCTAGTAAGCCTATACTTACACGATAACACTTAATGACTCACC  
AAACACATGCATATCATATAGTTAAACCAAGTCCATGACCACTAACAGGAGCCCTTTCAGCC  
CTTCTTATAACATCAGGACTAATCATATGATTCCACTTTAACTCTATATTCTTGCTATCGCTA  
GGCCTTACAACCAACATACTTACTATATACCAATGATGACGGGATATTATTGAGAGAGTAC

CTTTCAGGGTCATCACACCCCCGTTGTCCAAAAAGGACTGCGGTACGGAATAGTCCTATTTA  
TCGTATCAGAAGTATTCTTCTTCGCAGGGTTCTTCTGAGCTTTTTTATCACTCAAGCCTAGCAC  
CCACTCCCGAACTAGGGGCATGCTGACCACCCACAGGTATTACTCCCCTGAACCCGCTAGAA  
GTACCACTTCTCAATACTTCAGTACTTCTTGCATCCGGAGTGTCCATTACCTGAGCTCACCAC  
AGCTTAATAGAGGGAAGCCGCAAGCACATGCTTCAGGCCCTATTTATTACTATCTCTCTAGG  
CGTGTACTTCACACTTCTACAAGCCTCAGAGTATTATGAGGCGTCCTTCACTATCTCAGATGG  
AGTCTATGGCTCAACTTTTCTCATAGCGACTGGATTTTACGGACTTCATGTAATTATTGGCTC  
AACTTTTCTCACAGTCTGTTTCCTACGGCAACTACATTTTCATTTTACATCAAGCCACCATTTT  
GGCTTTGAAGCAGCAGCATGATATTGACACTTCGTAGATGTCGTATGACTATTCCTATATGTT  
TCTATCTATTGATGAGGGTCTTGCTTCTTTAGTATCGATCAGTACAATTGACTTCCAATCAGT  
TAGCTCTGGTGTAAATCCAGAAAGAAACAATCAACTTAATCTTAGCACTATTTACTAACATAC  
TACTAGCTTCCTTACTCGTCCTTATTGCCTTCTGACTACCACAATTAAATATCTATGCAGAAA  
AAGCAAGCCCCATGAATGCGGGTTTGACCCCGTAGGATCGGCACGCCTCCCTTTTTCAATA  
AAATTTTTCTAGTAGCTATCACATTTCTACTATTTGACCTAGAAAATCGCGCTACTCCTCCCC  
CTTCCCTGAGCATTACAACTGACAATCTAATAACGATACTCATCATAGCACTACTGCTTATC  
TCCCTATTAGCCGCAAGTCTGGCCTATGAATGAGCCGAAAAAGGTCTAGAATGGGCCGAAT  
ATGATAATTAGTTTAAACCAAAACAATGATTTGACTCATTAGATTATGAATAATAACATA  
ATTATCAAAATGCCTGTGGTCTATGTCAATATTTTCCTAGCCTTCATCGTATCCCTAATAGGGC  
TACTTATTTACCGATCACATCTAATGTCTCCCTACTTTGCCTGGAGGGTATAATGCTATCTT  
TATTTGTCACTAACAGTAACAGTTTTTAAATAATCATTTTACACTAGCTAACATAGCTCCCCA  
TTATCTTACTAGTATTTGCTGCCTGCGAAGCAGCACTAGGACTATCCCTGCTAGTAATAGTCT  
CCAACACTTATGGAACCGATTACGTACAAAATCTTAATCTCTTACAATGCTAAAAATTATCTT  
TCCCCTATAATACTAGTGCCCCTTACATGAGCATCAAAACCCAGTATAATCTGGATTAATA  
CAACAGCTTACAGCCTACTCATTGTCTTATCAGCTTGACATATTTCAACCAGCTCAGTGATA  
ATAGCCTAAACTTCTCATTATTATTCTTTACCGACTCCCTATCAGCCCCCTTACTAGCTCTTAC  
AACATGACTACTGCCTCTGATACTAATAGCAAGTCAATCCCACCTATCAAAGGAGACCCTGA  
CCCGAAAGAACTATATATCACTATACTAGTCCTCCTACAGCTATTCCTGATTATAACCTTTT  
CTGCTATAGAGCTAATCCTGTTCTATATCTTGTTCGAAGCCACCCTAATACCCACTCTAATTA  
TTATTACTCGATGAGGGAATCAAACAGAACGATTAAACGCGGGCCTTTACTTTCTATTTTAT  
ACTCTAGTAGGATCTTTACCACTGCTAATTGCACTACTACATACTCAAACAATCTAGGTAC  
CCTAAATCTTCTCATAATACTGAATCCAGCCCCCTGCCAACTCCTGATCCAGTGTCTT  
CCTGTGACTAGCATGTATAATAGCATTATAGTAAAAATACCTCTATATGGCCTTCACTTGTG  
ATTGCCAAAAGCACATGTAGAAGCCCCTATCGCAGGATCTATAGTGCTTGCCGCGTACTCC  
TAAACTAGGAGGCTACGGCATGATACGAATTACAACACTACTTGACCCTCTAACAAGCTTC  
ATGGCCTACCCCTTCATAATACTCTCACTATGGGGCATAATCATAACAAGTTCTATTTGCCTG  
CGCCAAACGGATTTAAAGTCCCTAATTGCTTACTCCTCTGTAGTCATATAGCCCTAGTCATT  
GTAGCAGTATTGATCCAACTCCATGAAGCTATATAGGAGCAACAGCCTTAATAGTTGCCCCA  
TGGACTAACATCCTCCATGCTATTCTGTCTTGCAAACCTCCAACCTATGAACGAGTCCATAGCC  
GAACTATAATCCTTGCGCGAGGTCTACAAACACTCCTTCCACTTATAGCAGCTTGATGACTA  
CTAGCAAGTCTTACTAATCTGGCACTCCCTCCTACCATCAATCTCATCGGAGAACTATTTGTA  
GTAGTAGCCACATTTTCATGATCTAACATCACCATCACTCTAATAGGAGGCCAACATCATCAT  
TACTGCCCTCTATTCTCTCTACATACTAATCACCACACAACGAGGCAAGTGCACAGACCATA  
TCAAAAGCATCAAGCCATCCTTCACACGAGAAAACGCCCTAATAGCTCTCCACCTCCTACCC  
CTTCTACTTCTATCTCTCAACCCCAAAGTAATTCTAGGACCCATTTACTGTAAATATAGTTTA  
ACAAAAACATTAGATTGTGAGTCTAATAATAAAAAGCCCAGGCCTTTTTATTTACCGAAAAAG  
TACGCAAGAAGTCTAATTCATGCATCCATGCATAAAATCATGGCTTTTTCAACTTTTAAAG  
GATAGAAGTAATCCATTGGTCTTAGGAATCAAAAAATTGGTGCAACTCCAAATAAAAAGTAA  
TTAATCTGTTTGCCTCCTCTATTATCACAACTTGTCTCATATTAACGATACCAATTATCCTTAC  
CGGCGCTTCAACACACAAAAATAAATTCTACCCACAGTATGTAAAAACTACAATTTCTATG  
CTTTCGCAGTCAGCACTGTTCTATAATGATATTCCTCTACTCAGGGCAAGAGATAATTATCT  
CAAACCTGACATTGAATAACTATTCAAACCCTAAAGCTAACTCTAAGCTTTAAGCTAGACTAT

TTCTCGATAATTTTTATACCAGTAGCCCTGTTCGTCACATGATCCATCATAGAATTTTCTATT  
GATATATATACACTGACCCCAACATCAACCGATTCTTCAAATATCTACTTATATTCTCATT  
CTATAATAATTTTAGTAACCGCAAATAATCTGTTCCAATATTCATCGGCTGAGAAGGGGTA  
GGAATCATATCTTTCCTCCTTATTGGGTGATGATACGGACGAACAGATGCCAATACAGCTGC  
TCTACAGGCAGTCGTATATAACCGCATCGGAGACGTAGGCTTTATTATAGCTATAGCCTGAT  
TTTTACTCAATACAAATGCATGAGACTTCCAACAAATCTTTGCAATCGAACATGACAACCTT  
AATATCCCCTAGCAGGACTACTCCTAGCAGCCACTGGAAAATCAGCCCAATTTCGGCCTTCA  
TCCATGACTTCCATCAGCTATAGAAGGACCCACTCCTGTTTCAGCCCTACTCCACTCCAGTAC  
AATAGTAGTAGCAGGGGTATTTCTTCTAATCCGATTTACCCCTTAATGGAACATAATAAGA  
CCATCCAAACAGCCGCCCTATGCTTAGGAGCAATAACAACCCTATTTACAGCAGCCTGCGCT  
CTCACCCAAAATGACATTA AAAAGATTATTGCCTTCTCCACCTCAAGCCAACTAGGATTAAT  
AATCGTAACAATTGGGATTAACCAACCCCATTTAGCATTCTTCATATCTGCACACACGCATT  
TTTCAAGGCCATACTGTTTATATGCTCTGGATCCATTATCCACAGTCTAAATGACGAACAAG  
ACATCCGAAAAATAGGAGGCCTATTCAAAGTCTTACCCTTACCACCCTGCACTAATTATT  
GGAAGTCTAGCACTCACAGGCATACCTTTTCTAACAGGATTTTACTCTAAAGACCTAATTAT  
CGAGACCGCCAATACATCGTATACCAACGCCTGAGCCCTACTAATAACTCTCGTCGCCACAT  
CCATAACCGCTGCCTACAGTACTCGAATTGTATTTTTTCGCACTTCTAGGACAACCTCGCTTTA  
ACCTGCTATTATCATCAACGAGAATAATCCTCTCTTGGTTAACTCCATCAAGCGTCTACTTC  
TAGGAAGTATTTTCGAGGATACCTAATCTCCACAATATTACACCTACTACCATCCCACAA  
ATAACCATACCCTACTATCTAAAAACAACAGCCCTCGCGGTCACTATACTAGGCTTTATCCT  
AGCACTAGAAGTCTAATACTACCATACAAAGTCTCAAATTTAACTATCCACAAAATGTATTCA  
AATTCTCCAATCAACTAGGGTACTTCCCCATTATTATTACCGCTTCTTACCAACAATGAGCT  
TATCAATAAGCCAAAAGATGGCATCTATATTACTAGACACAATCTGACTAGAAAATGTATTA  
CCAAAATCCATCTCCTACTTCCAAATAAAATCTTCAATCACCGTCTCCAACCAGAAAGGACT  
AATCAAAGTATACTTCTCTCTTTTCTGATCACACTAACCCCTAAGCTTCTCGTACTTAATTT  
CCACGAGTGACTTCCATAATTACTAATACACCAATAAGAAGAGACCACCCAGTAACAATAA  
CTAGCCAAGTCCCATAACTATACAAAGCCGCAATCCCCATGGCCTCCTCACTAAAAAACCT  
GAATCCCCCGTGTATATAATTACTCAATCACCTACCCCATTAATACTAATAACAATCTCAACT  
TCATCATCTTTTAGAACATAGCAGGCAATCAGTAACTCAGATAATAAACCCACAATAAACGC  
ACCTAATACAGCTTTATTAGAAACCCAGACCTCAGGATACTGCTCGGTAGCCATAGCCGTGG  
TATAACCAAAAACCAAGCATCCCACCCAAATAAACTAAAAAACTATCAAACCTAAAAA  
AGACCCCCCAAACTCAATACAATACCACACCCCAACACCCCCACTAATAATTAACCAATC  
CTCCATAAATTGGAGAAGGCTTAGAAGAAAACCCCACAAACTCATCACAAAGACAATACT  
TAAAAATAACACGATATACATTATCATTATTCTCACATGGAATCTAACCATGACTAATGACA  
TGAAAAATCACCGTTGTACTTCAACTACAAGAACCTTAATGACCAACATCCGAAAAACCAT  
CCATTAGCCAAAATCATCAACAACCTCACTCATTGATCTCCAGCACCATCAAATATCTCAGC  
ATGATGAAACTTTGGATCCCTCCTCGGAGTATGCCTAATCCTACAGATTCTGACAGGCCTATT  
TCTAGCTATACACTACACATCAGACGCGACTACAGCCTTTTCATCAGTCGCCCATATTTGCCG  
AGACGTCCATTACGGATGAATTATCCGATACATACATGCAAACGGAGCCTCCATGTTCTTCA  
TCTGCCTATTATACACGTAGGACGGGGCTTGTATTATGGCTCATACCTACTCTCAGAAACAT  
GAAACATTGGCATCATCCTCCTATTTACAGTTATAGCCACCGCATTATAGGATACGTCTTAC  
CCTGAGGCCAAATATCCTTCTGAGGAGCGACTGTCATTACCAACCTCCTATCAGCCATTCCCT  
ATATTGGAACGGATCTAGTAGAGTGAATCTGAGGGGGCTTTTCCGTAGATAAAGCAACCCTA  
ACACGATTCTTTGCTTTCCACTTTATCCTTCCATTTATCATCCTAGCACTAGCAGCAGTTCATC  
TATTGTTCTACACGAAACAGGATCCAACAACCCCTCTGGAATCCCATCCGACTCGGACAAA  
ATCCCATTCCACCCATACTATACAATTAAGGACGCCCTAGGCGCCCTACTTCTCATTCTAGCC  
CTAGCAACTCTAGTTCTATTCTCGCCCGACTTACTAGGAGACCCTGACAACCTATACCCCCGC  
AAACCCACTGAGCACCCCGCCCCACATCAAGCCCGAGTGATACTTTCTATTTGCTTACGCTA  
TCCTACGATCCATCCCCAACAACTAGGAGGAGTACTAGCGCTAATCTTCTCTATCCTAATC  
CTAGCCATTATCCCCCTTCTACACACATCTAAACAACGAGGAATAATGTTCCGACCCCTAAG  
CCAATGCCTATTTTGACTCCTAGTAGCAGACCTACTAACACTAACATGAATCGGAGGACAAC

CAGTAGAACATCCCTTCACCATTATCGGACAACTAGCCTCCATCCTCTACTTCACAATCCTCC  
TGGTGCTCATGCCCATCGCTGGAATCATTGAAAACAACCTCTCAAAATGAAGAGTCTTTGTA  
GTATAGTAATTACCTTGGTCTTGTAAGCCAAAAACGGAGAATATCTACCCTCCCCAAGACTC  
AAGGAAGAAGCAACAGCCCCACCATCAGCACCCAAAGCTGATGTTCTATTTAAACTATTCCC  
TG

>SRR6109214 Circular ReOrganized

GTACATACCATTATTTCACTTTATGTCCTATTTATTTTCATATATATCATTCCATGTACTGTACC  
ATCACAGTATGTTCTCGAATACTTTCTCCTTTGTTTTTTTTTCCCCCCTATGTATATCGTGTCAT  
TAATGGCGTGCCCCATGCATATAAGCATGTACATACTATGCTTGGCTTTACATGAGGACTTA  
CGTTCCGAAAAGTTTATTTTCAAGCGTATAGTCTGTAAGCATGTATTTCACTTAGTCCGGGAGC  
TTAGTCACCAGGCCTCGAGAAACCAGCAATCCTTGCGAGTACGTGTACCTCTTCTCGCTCCG  
GGCCCATGGAATGTGGGGGTTTCTATGTTGAACTATACCTGGCATCTGGTTCTTACCTCAG  
GGCCATGATAGCTCTAGATTCCAATCCTACTAACCCTTCAAATGGGACATCTCGATGGACTA  
ATGACTAATCAGCCCATGATCACACATAACTGTGGTGTACATGCAATTTGGTATCTTTTAATTTT  
TAGGGGGGGAACCTTGCTATGACTCAGCTATGACCGTAAAGGTCTCGTCGCAGTCAAATAATT  
TGTAGCTGGGCTTATTTATCTTTACGGGTCGGGCATAGATACCCATAAGGGGCTATTCAGT  
CAATGGTTACGGGGCATATAGTATGTAAATACCACTGAATCGAACGAACACGCACGTGTAC  
GCATATGTACGCATATGTACGCATATGTACGCATGTGTACGCATGTGTACGCATGTGTACGC  
ATGTGTACGCATGTGTACGCATGTGTACGCATGTGTACGCATGTGTACGCACGTGTACGCAC  
GTGTACGCACGTGTACGCACGTGTACGCACGTGTACGCACGTGTACGCACGTGTACGCACGT  
GTACGCACGTGTACGCACGTGTACGCACGTGTACGCACGTGTACGCACGTGTACGCACGTGT  
ACGCGCGCGTTTTTAGATATTAACCTTAGCTTAATCAAACCCCCCTTACCCCCCGTAACCTCAA  
GGAGCTTACGCACATTTATGATTGTCTGCCAAACCCCAAAAACAAGACTAAATGCACGTGC  
AAACATGAAGCTATTACACCCAAAATCCCACATAATAAGCTAAAATTTCCAGCCAAATAATC  
ACTACAATCACAGGCATGAGACTTTAAATTAAGATCTATCTATAGATATTTTTTTTTTTACTC  
TGTCTCCCTCCTATTGATTTTTCCGTTATTATCACTTTTTTAGCCACGAGCTTCTACTAAATTA  
TCCCATATAAATCCCAAAACCAACCGCGTTTATGTAGCTTAATAATAAAGCAAGGCACTGAA  
AATGCCTAGACGAGTTGTATAACCCCATAGACATAAAGGTTTGGTCCTAGCCTTCCCATTAG  
CTATTAACAAGATTACACATGTAAGTCTCCGCGCTCCAGTGAAAATGCCCTTTGGATCTTAA  
AGTGATCTGAAGGAGCGGGCATCAAGCACACCCCTCCCCGGTAGCTTATAACGCCTTGCTCA  
GCCACACCCCCACGGGATACAGCAGTGATAAAAATTAAGCCATAAACGAAAGTTTGACTAA  
GCTATGTTGATTAAAGGGTTGGTTAATTTTCGTGCCAGCCACCGCGGTTATACGATTGACCCA  
AGTTAATAGGCCACGGCGTAAAGCGTGTGAAAGAAAAAAATTTTTCCCCATTAAAGTTAA  
AGTTTAATCAAGCTGTAAAAAGCTACCAATAACACTAAAATAGACTACGAAAGTGACTTTA  
ATACTCTCAACCACACGACAGCTAAGATCCAACTGGGATTAGATACCCCACTATGCTTAGC  
CTTAAACATAAATAATTTATCAAACAAAATTATTCGCCAGAGAACTACTAGCAACGGCTTAA  
AACTCAAAGGACTTGGCGGTGCTTTAAACCCCCCTAGAGGAGCCTGTTCTGTAATCGATAAA  
CCCCGATAGACCTCACCACCCCTTGCTAATCCAGTCTATATACCGCCATCTTCAGCAAACCT  
TAAAAGGAAAAAGAGTAAGCACAAATCATCTTGCATAAAAAAGTTAGGTCAAGGTGTAACCTC  
ATGGGATGGGAAGAAATGGGCTACATTTTCTATTCAAGAACAACTACGAAAGTTTTTATGA  
AACTAAAAACTAAAGGTGGATTTAGTAGTAAACCAAGAATAGAGAGCTTGGTTGAATAAGG  
CAATGAAGCACGCACACACCGCCCGTCACCCTCCTCAAGTGGCACAAGTCAAATATAACCTA  
TTAAAACCAAATAAAACGCAAGAGGAGACAAGTCGTAACAAGGTAAGCGTACTGGAAAGT  
GTGCTTGGATAAACCAAAGTGTAGCTTAAACAAAGTATCTGGCTTACACCCAGAAGATTTCA  
CGTATGTGACCGCTTTGAGCCCAGAGCTAGCCCAGACAATAACCGATTAACTACCACAGGC  
CAATTAATAAAAACATTAGTAGCGCAATTAAGTATAGGAGATAGAAATTCTTTAGATCGG  
AGCTATAGAGAAAGTACCGCAAGGGAACGATGAAAGATTACCCAAAGTGATAAACAGCAA  
AGATTACCCCTTCTACCTTTTGCATAATGAGTTAGCCAGAAATAACCTAACAAAGAGAACTT  
AAGCTAGGTCCCCGAAACCAGACGAGCTACCTATGAACAATCCACTGGGGTAAACTCATCT  
ATGTTGCAAAATAGTGAGAAGATTTGTAGGTAGAGGTGAAAAGCCTAACGAGCCTGGTGAT  
AGCTGGTTGCCCAGAATAGAACTTCAGTTCAACTTTAAACTTGCCTACAAAACCTTAGATAAT

TTTAATGCAAGTTTAAAATATATTCTAAAAAGGTACAGCTTTTTAGAATCAAGGATACAACC  
TTACTTAGAGAGTAAATACTGATTAAACCATAGTAGGCCTAGAAGCAGCCATCAATTAAGA  
AAGCGTTTAAGCTCAACATCCATGTCAACTTAATACCAAAAAGTATTTAATCAACTCCTAATA  
TAACAACTGGGCTAATCTATTTTAATATAGAAGCAATAATGCTAATATGAGTAACGAGAGAT  
ACCTCTCCAACGCATAAGCCTATAACAGCAACGGATAACCACTGATAGTTAACAACAACGT  
AGAAATAACCCAACAATAAAACATCTACCAAACCAATTGTTAATCCAACACAGGTATGCGA  
CTAAGGAAAGATTAAAAGAAGTAAAAGGAACCTCGGCAAACACAAATCCCGCCTGTTTACCA  
AAAACATCACCTCCAGCATTCCCAGTATTGGAGGCACTGCCTGCCCGGTGACATTAGTTAAA  
CGGCCGCGGTATTCTGACCGTGCAAAGGTAGCATAATCATTTGTTCTCTAAATAAGGACTTG  
TATGAAAGGCCACACGAGGGTTTAACTGTCTCTTACTTCCAATCAGTGAAATTGACCTTCCC  
GTGAAGAGGCGGGAATAAAAACAATAAGACGAGAAGACCCTATGGAGCTTTAATTAAGTAGC  
TCAAAAAGAATCTATCTACCAGACCGACAGGAACAACATACTCCTTCCATGAGCTAACAATTT  
AGGTTGGGGCGACCTCGGAGCATAAAAACAACCTCCGAGTGATATTAATCTAGACGTACCAG  
TCAAAATGCTCACTTACTTATTGATCCAAAAACCTCTTTGATCAACGGAACAAGTTACCCTA  
GGGATAACAGCGCAATCCTATTTAAGAGTCCATATCGACAATAGGGTTTACGACCTCGATGT  
TGGATCAGGACATCCTAATGGTGCAGCAGCTATTAAGGGTTTCGTTTGTTCAACGATTAAAGT  
CCTACGTGATCTGAGTTCAGACCGGAGCAATCCAGGTCGGTTTCTATCTATTTAAACAACCT  
CTCCCGGTACGAAAGGACAAGAGAAGTAAGGCCTCCCTCACTGAGGCGCCTTAAGACCAAT  
AGATGATTTAATCTAAATCCAGTAAGTCTATCCCCAATACTGCCCAAGAGACAGGGCTTTGT  
TAGGGTGGCAGAGCCCGGTGATTGCATAAAACTTAAACCTTTATATTAGGGGTTCAAATCC  
TCTCCCTAACATTATGTTTATAATCAACACTATCTCACTAGTTGTACCCATTCTCCTTGCCGTA  
GCCTTCTTAACACTAGTAGAGCGAAAAAGTACTAGGCTATATACAACCTTCGTAAAGGACCAAA  
CATTGTAGGGCCCTACGGTCTCCTACAACCTGTGCGAGATGCTGTAAAACCTTTTCACCAAAG  
AGCCTCTACGCCCACTCACATCATCTACGACCATATTCATTATGGCCCCTATTCTGGCTCTAA  
CACTAGCCCTAACCATGTGAATTCCCCTACCAATGCCATATCCCCTTGTCATATAAACCTCG  
GAGTACTATTCACTAGCAATATCAAGCCTAGCTGTATACTCTATCCTTTGATCAGGATGA  
GCTTCAAATTCAAATAACGCTCTGATCGGAGCCCTACGGGCGGTAGCCAGACAATTTTCATA  
TGAAGTCACATTAGCTATTATCCTCCTATCAGTCCTACTAATGAATGGCTCATTTCGCACTTTC  
CACTTTAATTACTACTCAAGAGCACCTCTGACTAATCTTCCCTGCATGACCCCTAGCCATGAT  
ATGATTTATTTCCACCCTAGCAGAAACCAACCGAGCCCCCTTCGACCTAGCAGAAGGAGAAT  
CAGAACTGGTCTCAGGTTTTAACGTTGAGTACGCGGCAGGTCCGTTTCGCCCTATTTTTCTAG  
CAGAATATACTAATATCATTATAATAAATGCCCTCACGACTATCCTGTTCTTCGGGGCATTTC  
ATAATCCCTACATACCAGAACTGTACACTGTCAATTTACCGTAAAAACACTGCTCTTAACA  
GCTTCCTTCCTATGAATCCGTGCATCATATCCCCGATTCCGATATGACCAACTAATGCATCTG  
CTATGAAAAAACTTCCTACCCCTTACACTAGCCCTGTGCATGTGACATGTAACACTACCCATT  
ATCACAGCAAGCATTCCCCCCCCAAACATAAGAAATATGTCTGACAAAAGAATTACTTTGATA  
GAGTAAATAATAGAGGTTGGAATCCTCTTATTTCTAGAATTATAGGAATTGAACCTAATCCT  
AAGAACTCAAAAATCTTCGTGCTACCTAATTACACCATATCCTAAAGTAAGGTCAGCTAAAT  
AAGCTATCGGGCCCATACCCCGAAAATGTTGGTTTATCCCCCTTCCCGTACTAATTAAACCTCC  
CATTCTTATCATTATCACATCCACCATTGTCCTAGGAACCATAATCGTTTTATTTAGCTCCCA  
TTGACTCATAATCTGAATTGGCTTTGAAATAAATATACTAGCTATTATCCCAATCCTAATGAA  
AAAATTTAACCACGAGCCATAGAAGCCTCTACAAAATATTTCCCTCACACAAGCCACTGCAT  
CCATGCTTCTAATACTAGGCATTATTATCAACCTACTACACTCAGGGCACTGAACAGTCTCA  
ATAATCCCTAACCCAATCGCATCAACCGTAATTACCATTGCCCTAGCAATAAAACTCGGCCT  
ATCCCCCTTCCACTTCTGAGTCCCAGAAGTCACACAAGGCGTTCCTTTATCCTCAGGAATAAT  
TCTACTAACATGACAAAAAATCGCACCTCTATCCGTCTTATATCAAATCTCACCATCCATCAA  
CCCAAACCTACTGGTAGCAATAGCCGCCACATCCGTATTAGTAGGGGGCTGAGGAGGATTA  
AACCAAACCTCAACTTCGAAAAATCCTAGCATACTCTTCAATCACTCACATGGGCTGAATAGC  
CGCCATCATAGTATATAACCCCACTCTAATAATCCTTAACCTTGCAATCTATATCATAATAAC  
TCTGGGGACATTTATACTATTTATGCACAGCCTATCCACAACAACACTATCACTGTCCCATAC  
ATGAAATAAACTACCACTAATTGCCTCACTAATTCTAGCACTTATATTATCACTAGGCGGCCT

CCCTCCCCTCTCAGGCTTCATCCCCAAATGAATAATTATTCAAGAACTAACAAAAAATGATA  
TAATCGTCATGCCCACATTCATAGCCATCACAGCCTTACTAAATCTTTATTTTACATGCGTC  
TAACATACGCCACAGCATTAAACAATATTCCCCTCAGCAAATAACATAAAAAATAAAATGACA  
GTTTGAAAGCACAAAAAAAATAATTCTCTTGCCCCCTCTAATCGTAGCATCAACCATACTCC  
TCCCCTAACTCCATTACTATCAATCATGGACTAGAGATTTAGGCTAAAAAGACCAAGGGCC  
TTCAAAGCCCTAAGTAAGTGAAACCCACTTAATCTCTGCAATTATCTAAGGACTGCAAGAAC  
ATATCTCACATCAATTGAACGCAAAACAACCGCTTTAATTAAGCTAAGCCCTCCTAGATTGG  
TGGGCTTTTATCCCACAAAATTTTAGTTAACAGCTAAAAACCCCAAACAACCTGGCTTCAATC  
TACTTCTCCCGCCGCGTGGGAAAAAAAGGCGGGAGAAGCCCCGGCAGAATTGAATCTGCTT  
CTTTGAATTTGCAATTCAATATGATTATTCACCACAGAGCTTGGCAAAAAGGGGACTCAACC  
TCTATTCTTAGATTTACAGTCTAGTGCTTTTATCAGCCATTTTACCCATGTTTCATAAACCGAT  
GACTATTCTCTACAAATCATAAAGATATTGGCACTCTCTATCTTCTATTTCGGTGCATGAGCCG  
GAATAGTAGGTACTGCTCTCAGCCTTTTGATTCTGTGCCGAACCTAGGTCAGCCCGGGACCCTG  
TTGGGGGATGATCAGATCTACAATGTAGTCGTAACCTGCCCATGCATTCTGTGATAATCTTCTTT  
ATGGTTATGCCTATTATAAATTGGGGGGTTTGGGAACCTGATTAGTGCCCTTAATAAATTGGTGCT  
CCTGACATAGCGTTTCTCTGAATGAATAACATAAGCTTCTGACTGCTGCCACCATCTTTCTTG  
TTGCTTCTAGCTTCTTCTATAGTAGAAGCAGGTGCAGGAACCTGGGTGGACTGTCTACCCCCCT  
CTAGCGGGCAATCTGGCCCATGCAGGAGCATCAGTAGACCTAACAACTCTTTTCTCTACACTT  
AGCAGGCATCTCTTCTATTCTGGGAGCCATCAATTTTCATCACTACTATCATTAACATAAAACC  
TCCTGCAATATCTCAATACCAAACCCCTCTGTTTGTGTGATCAGTCCTAATCACGGCAGTGCT  
TCTTCTTTTATCTCTGCCAGTCTTGGCGGCTGGGATTACCATACTACTTACAGATCGAAACCT  
CAACACTACCTTTTTTTGACCCAGCCGGAGGGGGGAGATCCTATTCTGTACCAACACTTGTTTTG  
ATTCTTCGGACACCCTGAAGTTTATATCCTAATTCTTCCAGGGTTCGGAATGATCTCTCATAT  
TGTCACCTTATTACTCAGGAAAAAAGAGCCTTTTCGGCTACATGGGTATAGTCTGAGCGATAA  
TATCCATTGGATTCTTAGGATTTATCGTGTGAGCTCATCATATGTTTACCGTAGGTATAGATG  
TCGACACACGAGCTTACTTCACTTCAGCTACCATAATTATTGCAATCCCAACAGGAGTCAAA  
GTATTTAGCTGACTAGCTACCCTGCACGGAGGGAATATTAAATGATCTCCTGCTATAATATG  
AGCCCTAGGCTTTATTTTTCTGTTTACAGTAGGGGGCCTTACAGGAATTGTCTTAGCTAATTC  
GTCTCTAGACATTGTTCTCCATGACACATATTATGTGGTAGCCCATTTCCACTATGTGCTGTC  
AATAGGAGCTGTCTTTGCCATCATAGGAGGATTTGTCCACTGATTTCCACTGTTTTCAGGCTA  
TACACTTAATAATACATGAGCAAAGATTCACCTTCATAATCATATTCGTTGGGGTTAATATAA  
CTTTCTTTCCCCAACATTTCTGCGGCTGTGCGGAATGCCTCGGCGATATTCCGACTATCCAG  
ATGCCTACACAATATGAAATACAGTATCTTCTATAGGCTCATTTCATTTCACTAACAGCAGTTA  
TACTAATAATTTTCATGATTTGGGAGGCCTTTGCATCAAAGCGAGAGGTAGCAGTGGTAGAA  
CTCACTTCAACCAATATTGAATGACTACATGGATGTCCTCCTCCGTACCATAACATTTGAAGA  
ACCCGCTTACGTTATACTAAAAATAAGAAAGGAAGGAATCGAACCCCTCTGGAATTGGTTTCAA  
GCCAATATCATAACCACTATGCCTCTCTCAATAAAGAGATATTAGTAAAAATTACATAACTT  
TGTCAGGGTTAAATTATAGGTGAAAATCCTTTATATCTTTATGGCATATCCCCTTCAAATAGG  
TCTTCAAGACGCAACTTCTCCTATCATGGAGGAACTCCTACATTTTCATGACCATACACTAAT  
AATTGTATTCTAATTAGCTCCTTAGTTCTCTATATTATTTCAATTATATTAAGTGCCAAATTA  
ACACACACAAATACAATAGATGCACAAGAAGTAGAGACGGTATGAACCATCTTGCCGGCTA  
TTATTCTAATTCTAATTGCACTCCCATCGCTACGGATTCTTTATATAATAGATGAAATCAATA  
ACCCCTCACTGACCGTAAAAACCATGGGCCATCAATGATATTGAAGTTACGAGTATACAGAT  
TACGAAGATCTGAGCTTTGACTCTTATATAACCCCAACACAAGAACTAAAACCTGGAGAACT  
GCGACTATTAGAAGTGGAACAATCGAGTAGTACTGCCCATAGAAATAACGATCCGTATGCTG  
ATCTCATCAGAAGATGTCTTGCACTCATGGGCTGTGCCATCCCTAGGATTAAAAACTGATGC  
AATCCCAGGACGGCTAAACCAAACAACCTCTCATAGCTATACGACCAGGATTATACTACGGCC  
AATGCTCAGAAATTTGTGGCTCCAATCACAGTTTTTATACCTATTGTTCTCGAGCTAGTTCCAC  
TATCTTACTTTGAAAAATGGTCTGCCTCGATACTATAGAATCATTAAGAAGCTAATATAGCG  
TTAACCTTTTAAGTTAAAGACTGAGAATGCAGACTTCTCCTTAATGAAGATGCCACAACCTAG  
ACACATCAACATGATCTATCACAATCCTATCTATAGTTCTAGCACTATTTCATTATATTCCAGT



TAAAGATCTCAAAATATAAATACCCCAAACCCCGAACCGAAATCCCCTTCACCATCAAAG  
AACTTATACCTTGAGAAGAAAAATGAACGAAAATCTATTACCTCTTTTATTACCCCGATG  
ATAATGGGGGTCCCCATTGTAGTCTTAATCGTTATGTTTCCGAGCATTTTATTCCCTTCTCCC  
AGTCGACTGATCGACAATCGCTTAGTGTCTATTCAACAATGACTAGTCTGGCTAACATCAAA  
ACAAATGCTATCCATTCAATAATCGTAAAGGGCAAACCTGAGCACTAATGTTGATATCCCTAA  
TCCTATTTATTGGCTCAACTAATCTTCTGGGTCTATTACCACACTCATTACACCTACCACAC  
AACTGTCAATGAATCTGGGAATGGCCATTCCCTTGTGAGCAGGTACAGTTGCCACTGGATTT  
CGATATAAGACCAAAGCATCCTTAGCTCACTTTCTACCTCAAGGAACACCTTTCCCTCTAATC  
CCTATACTTGTTATTATCGAAACAATCAGTCTATTTCATCCAACCTATGGCCTTAGCCGTACGA  
TTAACTGCTAATATTACTGCAGGTCACTTGCTCATCCATTTAATTGGAGGGGGCTACTCTAGCT  
CTAACAAGTATTAGCACTATTACAGCCCTCATCACCTTTATTATTCTAGTGCTACTTACTATT  
CTCGAGTTTGCTGTAGCCCTCATTACAGGCCTACGTCTTTACCCTGCTAGTAAGCCTATACTTA  
CATGATAACACTTAATGACTCACCAAACACATGCATATCATATAGTTAACCCAAGTCCATGA  
CCACTAACAGGAGCCCTTTCAGCCCTTCTTATAACATCAGGACTAATCATATGATTCCACTTT  
AACTCTATATTCTTGCTATCGCTAGGCCTTACAACCAACATACTTACTATATACCAATGATGA  
CGGGATATTATTGAGAGAGTACCTTTCAGGGTTCATCACACCCCCGTTGTCCAAAAAGGACT  
GCGGTACGGAATAGTCCTATTTATCGTATCAGAAGTATTCTTCTTCGCAGGGTTCTTCTGAGC  
TTTTTATCACTCAAGCCTAGCACCCACTCCCGAACTGGGGGCATGCTGACCACCCACAGGTA  
TTACTCCCCTGAACCCGCTAGAAGTACCCTTCTCAATACTTCAGTACTTCTTGCATCCGGAG  
TGTCATTACCTGAGCTCACCACAGCTTAATAGAGGGAAGCCGCAAGCACATGCTTCAGGCC  
CTATTTATTACTATCTCTCTAGGCGTGTACTTCACACTTCTACAAGCCTCAGAGTATTATGAG  
GCGTCCTTCACTATCTCAGATGGAGTCTATGGCTCAACTTTCTTCATAGCGACTGGATTTAC  
GGACTTCATGTAATTATTGGCTCAACTTTTCTCACAGTCTGTTTCCTACGGCAACTACATTTT  
CATTTTACATCAAGCCACCATTTTCGGCTTTGAAGCAGCAGCATGATATTGACACTTCGTAGA  
TGTCGTATGACTATTCCCTATACGTTTCTATCTATTGATGAGGGTCTTGCTTCTTTAGTATCGAT  
CAGTACAATTGACTTCCAATCAGTTAGCTCTGGTGTAATCCAGAAAGAAACAATCAACTTAA  
TCCTAGCACTATTTACTAACAATACTACTAGCTTCCTTACTCGTCCTTATTGCCTTCTGACTACC  
ACAATTAATATCTATGCAGAAAAAGCAAGCCCCTATGAATGCGGGTTTGACCCCGTAGGAT  
CGGCACGCCTCCCTTTTTCAATAAAATTTTTCCTAGTAGCTATCACATTTCTACTATTTGACCT  
AGAAATTGCGCTACTCCTCCCCCTTCCCTGAGCATCACAACTGACAATCTAATAACGATAC  
TCATCATAGCACTACTGCTTATCTCCCTATTAGCCGCAAGTCTGGCCTATGAATGAGCCGAA  
AAAGGTCTAGAATGGGCCGAATATGATAATTAGTTTAAACCAAAACAAATGATTTTCGACTCA  
TTAGATTATGAATAATAACATAATTATCAAATGCCTGTGGTCTATGTCAATATTTTCTAGCC  
TTCATCGTATCCCTAATAGGGCTACTTATTTACCGATCACATCTAATGTCCTCCCTACTTTGC  
CTGGAGGGTATAATGCTATCTTTATTTGTCATACTAACAGTAACAGTTTAAATAATCATTTT  
ACACTAGCTAACATAGCTCCCATTTATCTTACTAGTATTTGCTGCCTGCGAAGCAGCACTAGG  
ACTATCCCTGCTAGTAATAGTCTCCAACACTTATGGAACCGATTACGTACAAAATCTTAATCT  
CTTACAATGCTAAAAATTATCTTTCCCACTATAATACTAGTGCCCCTTACATGAGCATCAAAA  
CCCAGTATAATCTGGATTAATACAACAGCTTACAGCCTACTCATTTGTCTTATCAGCTTGACA  
TATTTCAACCAGCTCTGTGATAATAGCCTAAACTTCTCATTATTATTCTTTACCGACTCCCTAT  
CAGCCCCCTTACTAGCTCTTACAACATGACTACTGCCTCTGATACTAATAGCAAGTCAATCCC  
ACCTATCAAAGGAGACCCTGACCCGAAAGAACTATATATCACTATACTAGTCCTCCTACAG  
CTATTCCTGATTATAACCTTTTCTGCTATAGAGCTAATCCTGTTCTATATCTTGTTGGAAGCCA  
CCCTAATACCCACTCTAATTATTATTACTCGATGAGGGAATCAAACAGAACGATTAAACGCG  
GGCCTTTACTTTCTATTTTATACTCTAGTAGGATCTTTACCACTGCTAATTGCACTACTACATA  
CTCAAAACAATCTAGGTACCCTAAATCTTCTCATAATAACAATACTGAATCCAGCCTCTGCCA  
AACTCCTGATCCAGTGTCTTCCCTGTGACTAGCATGTATAATAGCATTTCATAGTAAAAATACCT  
CTGTATGGCCTTCACTTGTGATTGCCAAAAGCACATGTAGAAGCCCCTATCGCAGGATCTAT  
AGTGCTTGCCGCCGTACTCCTAAAACCTAGGAGGCTACGGCATGATACGAATTACAACACTAC  
TTGACCCTCTAACAAGCTTCATGGCCTACCCCTTCATAATACTCTCACTATGGGGCATAATCA  
TAACAAGTTCTATTTGCCTGCGCCAAACGGATTTAAAGTCCCTAATTGCTTACTCCTCTGTTA

GTCATATAGCCCTAGTCATTGTAGCAGTATTGATCCAAACTCCATGAAGCTATATAGGAGCA  
ACAGCCTTAATAGTTGCCCATGGACTAACATCCTCCATGCTATTCTGTCTTGCAAACCTCCAAC  
TATGAACGAGTCCATAGCCGAACTATAATCCTTGCGCGAGGTCTACAAACACTCCTTCCACT  
TATAGCAGCTTGATGACTACTAGCAAGTCTTACTAATCTGGCACTCCCTCCTACCATCAATCT  
CATCGGAGAACTATTTGTGGTAGTAGCCACATTTTCATGATCTAACATCACCATCACTCTAAT  
AGGAGCCAACATCATCATTACTGCCCTCTATTCTCTCTACATACTAATCACCACACAACGAG  
GCAAGTGCACAGACCATATCAAAAGCATCAAGCCATCCTTCACACGAGAAAAACGCCCTAAT  
AGCTCTCCACCTCCTACCCCTTCTACTTCTATCTCTCAACCCCAAAGTAATTCTGGGGCCCAT  
TTACTGTAAATATAGTTTAAACAAAAACATTAGATTGTGAATCTAATAATAAAAGCCAGGCC  
TTTTTATTTACCGAAAAAGTACGCAAGAACTGCTAATTCATGCATCCATGCATAAAATCATG  
GCTTTTTCAACTTTTAAAGGATAGAAGTAATCCATTGGTCTTAGGAATCAAAAAATTGGTGC  
AACTCCAAATAAAAGTAATTAATCTGTTTGCCTCCTCTATTATCACAACCTTGCTCATATTAA  
CGATACCAATTATCCTTACCGGCGCTTCAACACACAAAAATAAATTCTACCCACAGTATGTA  
AAAACCTACAATTTCTATGCTTTTCGCAGTCAGCACTGTTCTTATAATGATATTCCTCTACTCA  
GGGCAAGAGATAATTATCTCAAACCTGACATTGAATGACTATTCAAACCCTAAAGCTAACTCT  
AAGCTTTAAGCTAGACTATTTCTCGATAATTTTATACCAGTAGCCCTGTTTCGTCACATGATC  
CATCATAGAATTTTCTATTTGATATATACACACTGATCCCAACATCAACCGATTCTTCAAATA  
TCTACTTATATTCCTCATTACTATAATAATTTTAGTAACCGCAAATAATCTGTTCCAACCTATT  
CATCGGCTGAGAAGGGGTAGGAATCATATCTTTCCTCCTTATTGGGTGATGATACGGACGAA  
CAGATGCCAATACAGCTGCTCTACAGGCAGTCGTATATAACCGCATCGGAGACGTAGGCTTT  
ATTATAGCTATAGCCTGATTTTTACTCAATACAAATGCATGAGACTTCCAACAAATCTTTGCA  
ATCGAACATGACAACCTTAATATCCCACTAGCAGGACTACTCCTAGCAGCCACTGGAAAATC  
AGCCCAATTTCGGCCTTCATCCATGACTTCCATCAGCTATAGAAGGACCCACTCCTGTTTCAGC  
CCTACTCCACTCCAGTACAATAGTAGTAGCAGGGGTATTTCTTCTAATCCGATTTACCCCTT  
AATGGAACATAATAAGACCATCCAAACAGCCGCCCTATGCTTAGGAGCAATAACAACCTTA  
TTTACAGCAGCCTGCGCTCTCACCCAAAATGACATTAATAAAGATTATTGCCTTCTCCACCTCA  
AGCCAACTAGGATTAATAATCGTAACAATTGGGATTAACCAACCCCATTTAGCATTCTTCA  
TATCTGCACACACGCATTTTCAAGGCCATACTGTTTATATGCTCTGGATCCATTATCCACAG  
TCTAAATGACGAACAAGACATCCGAAAAATAGGAGGCCTATTCAAAGTCTTACCACTTACCA  
CCACTGCACTAATTATTGGAACCTAGCACTCACAGGTATACCTTTCCTAACAGGATTTTACT  
CTAAAGACCTAATTATCGAGACCGCCAATACGTCTGTATACCAACGCCTGAGCCCTACTAATA  
ACTCTCGTCGCCACATCCATAACCGCTGCCTACAGTACTCGAATTGTATTTTTCGCACTTCTA  
GGACAACCTCGCTTTAACCCCTGCTATTATCATCAACGAGAATAATCCTCTCTTGGTTAACTCC  
ATCAAGCGTCTACTTCTAGGAAGTATTTTCGCAGGATACCTAATCTCCCACAATATTACACCT  
ACTACCATCCCACAAATAACCATACCCCTACTATCTAAAAACAACAGCCCTCGCGGTCACTAT  
ACTAGGCTTTATCCTAGCACTAGAACTTAATACTACCATACAAAGTCTCAAATTTAACTATCC  
ACAAAATGTATTCAAATTTCTCAATCAACTAGGGTACTTCCCTATTATTATTCACCGCTTCT  
ACCAACAATGAGCTTATCAATAAGCCAAAAGATGGCATCTATATTACTAGACACAATCTGAC  
TAGAAAAATGTATTACCAAAATCCATCTCCTACTTCCAAATAAAATCTTCAATCACCGTCTCCA  
ACCAGAAAGGACTAATCAAACCTATACTTCTCTCTTTTCATGATCACACTAACCTAAGCTTCC  
TCGTACTTAATTTCCACGAGTGACTTCCATAATTACTAATAACCAATAAGAAGAGACCACC  
CAGTAACAATAACTAGCCAAGTCCCATAACTATACAAAGCCGCAATCCCCATGGCCTCCTCA  
CTAAAAAACCTGAATCCCCCGTGTCATAAATTACTCAATCACCTACCCCATTAACCTTAAA  
TACAATCTCAACTTCATCATCTTTTAGAACATAGCAGGCAATCAGTAACTCAGATAATAAAC  
CCACAATAAACGCACCTAATACAGCTTTATTAGAAACCCAGACCTCAGGATACTGCTCGGTA  
GCCATAGCCGTGGTATAACCAAAAACCACAAGCATCCCACCCAAATAAACTAAAAAACTA  
TTAAACCTAAAAAAGGCCCCCCAAAACCTCAATACAATACCACACCCCAACACCCCCACTAAT  
AATTAAAACCAATCCTCCATAAATTGGAGAAGGCTTAGAAGAAAACCCCAACAAAACCTCATC  
ACAAAGACAATACTTAAAATAAACACGATATACATTATCATTATTCTCACATGGAATCCAAC  
CATGACTAATGACATGAAAAATCACCGTTGTACTTCAACTACAAGAACCTTAATGACCAACA  
TCCGAAAAACCCATCCATTAGCCAAAATCATCAACAACTCACTCATTGATCTCCAGCACCA

TCAAATATCTCAGCATGATGAAACTTTGGATCCCTCCTCGGAGTATGCCTAATCCTACAGATT  
CTGACAGGCCTATTTCTAGCTATACACTACACATCAGACGCGACTACAGCCTTTTCATCAGTC  
GCCCATATTTGCCGAGACGTCCATTACGGATGAATTATCCGATACATACATGCAAACGGAGC  
CTCCATGTTCTTCATCTGCCTATTCATACACGTAGGACGAGGCTTGTATTATGGCTCATACCT  
ACTCTCAGAAACATGAAACATTGGCATCATCCTCCTATTTACAGTTATAGCCACCGCATTTCAT  
AGGATACGTCCTACCCTGAGGCCAAATATCCTTCTGAGGAGCGACTGTCATTACCAACCTCC  
TATCAGCCATTCCCTATATTGGAACGGATCTAGTAGAGTGAATCTGAGGGGGCTTTTCCGTA  
GATAAAGCAACCCTAACACGATTCTTTGCTTTCCACTTTATCCTTCCATTTATCATCCTAGCA  
CTAGCAGCAGTCCATCTATTGTTCTACACGAAACAGGATCCAACAACCCCTCTGGAATCCC  
ATCCGACTCGGACAAAATCCCATTCCACCCATACTATAACAATTAAGGACGCCCTAGGCGCCC  
TACTTCTCATTCTAGCCCTAGCAACTCTAGTTCTATTCTCGCCCGACTTACTAGGAGACCCTG  
ACAATAATACCCCGCAAACCCACTGAGCACCCCGCCCCACATCAAGCCCGAGTGATACTTT  
CTATTTGCTTACGCTATCCTACGATCCATCCCCAACAACTAGGAGGAGTACTAGCGTAAT  
CTTCTCTATCCTAATCCTAGCCATTATCCCCCTTCTACACACATCCAAACAACGAGGAATAAT  
GTTCCGACCCCTAAGCCAATGCCTATTTTGACTCCTAGTAGCAGACCTACTAACACTAACAT  
GAATCGGAGGACAACCAAGTAGAACATCCCTTCACCATTATCGGACAGCTAGCCTCCATCCTC  
TACTTCACAATCCTCCTGGTGCTCATGCCCATCGCTGGAATCATTGAAAACAACCTCTCAAA  
ATGAAGAGTCTTTGTAGTATAGTAATTACCTTGGTCTTGTAAGCCAAAAACGGAGAATATCT  
ACCTCCCCAAGACTCAAGGAAGAAGCAACAGCCCCACCATCAGCACCCAAAGCTGATGTT  
CTATTTAAACTATTCCCTG

>SRR7477311 (circular) REORGANIZED

GTTAATGTAGCTTAAACCAAAGCAAAGCATTGAAAATGCTTAGATGAGCCCACAACTCC  
ATAAACACACAGGTTTGGTCCCAGCCTTTTTTATTAATTTTCAATAGGATTACACATGCAAGTA  
TCCGCCCCCAGTGAAAATGCCCTTCAAGTTATCACAGTACCTGAAGGAGCTGGCATCAAGC  
ACGCCAATAAACGCAGCTAACGACGCCTTGCAGAGCCACACCCCCACGGGAAACAGCAGTG  
ATAAAAATTAGGCTATAAACGAAAGTTTCGACCTAGCCATATTGCATTGGGTTGGTAAATCTC  
GTGCCAGCCACCGCGGTCATACGATTAACCCTAGCTAATAAATAACCGGCGTAAAGCGTGCT  
AAGATGAATCCAATCCAAATAAAGTTAAGCCCTGACCAGGCCGTAAAAAGCCGTGGCTACC  
GTAAAAATAAACTACGAAAGTAACTTTAATTACATCGACACACGATAGCTAAGACCCAAA  
CTGGGATTAGATACCCCACTATGCTTAGCCCTAACTTAAATAATTCACCAGACAAAATTAT  
TCGCCAGAGAACTACTGGCAACAGCCTAAACTCAAAGGACTTGGCGGTGCTTTACATCCCC  
CTAGAGGAGCCTGTTCTGTAATCGATAAACCCCGATAAACCCCTACCAATTCTAGCTAATACA  
GCCTATATACCGCCATCTCCAGCAAACCCTAAAAAGGAAGCACAGTAAGCAAGACTATGAA  
AACATAAATACGTTAGGTCAAGGTGTAGCCCATGAATTGGAAAGAAATGGGCTACATTTTCT  
AAAATAGAACACAAACGAACGCCCTAATGAAAACGAGGGCCAAAGGAGGATTTAGCAGTA  
AGCTGAGAATAGAAAGCTCAACTGAACCCGGCCCTAAAGCACGCACACACCGCCCGTCACC  
CTCTTCAAATCCCCAAGAATACCTAAATATATTAGACAAACACCAAGGCATGAGAAGAGAC  
AAGTCGTAACAAGGTAAGCATACTGGAAGGTGTGCTTGGATCACCAAAGTGTAAGCTTAAAC  
AAAGCATCTGGCCTACACCCAGAAGATCTCAATAACATGACCACTTTGAACAAATCCTAGCC  
CAACCAACACCCAACATACAACCAAACAGAGCACATAAACCAAAGCATTACTAGACTAAA  
GTATAGGCGATAGAAATTACACAACGGCGCTATAGAAAAAGTACCGCAAGGGAAAGATGA  
AAGATGCATTCAAAGTACAAAAAAGCAAAGATTACCCCTTGTACCTTTTGCATAATGGACTA  
ACTAGAAACACCCTAGCAAAGAGAACTTAAGCTAGAAACCCCGAAACCAGACGAGCTACCT  
ACGAGCAGTTTAAAGAACCCACTCATCTATGTGGCAAAATAGTGAGAAGACTTATAGGTAG  
AGGTGAAAAGCCTAACGAGCCTGGTGATAGCTGGTTGTCCAAGAAATGAATCTAAGTTCAA  
CTTGAAGCATACCCAAAAGCCCCAAAACCTATAATGTAGGCTTCAAGTATAGTCTAAAAAGG  
TACAGCTTTTTTAGAAACAGAATTAAATCTTAATTAGTGAGTAAACAATACAACAACCATAGT  
TGGCCTAAAAGCAGCCATCAATTAAGAAAGCGTCAAAGCTCAACAATAAGACATAAATAAT  
ACCACAAATAAAAAATCAACTCCTAAACCAATATTGGACTAATCTATCAATAAATAGAAGAA  
ATACTGTTAGTATGAGTAACAAGAAATAGATCTCCTTGCACAAGCTTATATCAGAACGGATG

ACCCACTGATAATTAACAACAAAACAAATCAAACCCAAAAATAGAACTTTGTTAAATAGAT  
TGTTAACCCAACACAGGCGTGCATATTCTCAAAGGAAAGGTTAAAACAAATGAAAGGAACT  
CGGCAAACACAAACCCCGCCTGTTTACCAAAAACATCACCTCTAGCATAACCAGTATTAGAG  
GCACTGCCTGCCCAGTGACTCGCGTTAAACGGCCGCGGTATTCTGACCGTGCAAAGGTAGCA  
TAATCACTTGTTCTCTAAATAAGGACTAGTATGAACGGCTAGACGAGGGTTTTACTGTCTCTC  
ATCTGTAACCAGTGAAATTGACCTCCCCGTGAAGAGGCGGGAATAATATAATAAGACGAGA  
AGACCCTATGGAGCTTTAATTAAACAGCTTAAAATTAACCCAACACCACTCTAACAGAGATA  
TAACAAACCAATTAGCCTAAGCTGTCAATTTTGGTTGGGGTGACCTCGGAGCAAAAAACAAC  
CTACGAGCGGTCAAATCCAGACTAACAAGTCCAGATAATCCGTTAATTGATCCAACAACCTTG  
ATCAACGGAACAAGTTACCTAGGGATAACAGCGCAATCCTATTGAGAGTCCATATCGAC  
AATAGGGTTTACGACCTCGATGTTGGATCAGGACATCCCAATGGTGCAGAAGCTATTAATGG  
TTCGTTTGTTCAACGATTAAAGTCCTACGTGATCTGAGTTCAGACCGGAGTAATCCAGGTCG  
GTTTCTATCTATTAATACACTCCTCCAGTACGAAAGGACAAGAGAAGTAGGGCCTACCTCA  
CACAGGCGCCCTCGAATCAATAAATGACTACCCTCTTAATTTAGCCAATTCACAACAACCCC  
CAGTCCTAGAACCAGGGCCAGCTAGGGTAGCAAAGCACGGCAACTGCACAAGACTTAAGCT  
CTTGTAACAGAGGTTCAACTCCCCTCCCTAGCAGCAATGTACACAATCAACATAATAATAAT  
GATCATCCCCATCCTACTAGCCGTGGCATTCTTAACGCTAGTAGAACGCAAAGTGCTAGGAT  
ACATGCAACTACGAAAGGGCCCAAACATCGTGGGCCCTTGAGGCCTGCTACAACCAATCGC  
CGACGCAGTAAAACCTATTTACTAAAGAGCCCCTACGACCCCTAACATCCTCAATCACAATAT  
TCATCATGGCACCTATCCTAGCACTGACACTCGCACTCACCATGTGAGTACCACTACCAATG  
CCACACCCACTAGTCAACATAAACCTAGGAGTGCTATTCATACTGGCCATATCAAGCCTCGC  
CGTATACTCCATCTTATGATCAGGGTGAGCCTCAAACCTCAAATACGCCCTCATTGGAGCAC  
TACGTGCAGTGGCCCAAACCATCTCATAACGAAGTGACACTAGCAATTATCCTGCTGTCCTTA  
CTGTTAATAAGCGGGTCCTTCACCCTCTCCACCCTAATCACAACCCAAGAAAAGCTATGATT  
ACTAGTGCCCGCATGACCCCTGGCCATAATATGATTATCTCGACCCTAGCCGAGACAAATC  
GAGCACCCCTTCGACCTAACAGAAGGAGAATCTGAGCTCGTATCCGGCTTTAACGTTGAATAC  
GCAGCAGGCCCATTCGCACTCTTCTTCCTTGCCGAATACGCAAACATCATCATAATAAACAT  
CTTGTCAGTGACGCTCTTCATAGGAGCCTTTCACGACCCCCACACCCAAGCCTCTACACAG  
TTAATTTTGTAGTAAAAACACTCGCCCTTACCGCCCTATTCCCTATGAATCCGAGCATCCTACC  
CACGATTCCGCTACGACCAACTAATGCACCTACTATGAAAAAACTTCTACCCTAACCCCTA  
GCACTGTGCATGTGACACGTATCAATACCAATCGCCCTGTCAAGCATTCCCCCACAATCATA  
AGAAATATGTCTGACAAAAGAATTACTTTGATAGAGTAAATAATAGAGGTTTAAATCCCCTT  
ATTTCTAGAAAAACAGGCATTGAACCTGCACCTGAGAGCTCAAAAATCTCCGTGCTACCAAC  
TTACACCACAATCTACAGTAAGGTCAGCTAAGCAAGCTATCGGGCCCATACCCCGAAAATGT  
TGGATCACAGCCTTCCCGTACTAATAAACCTCACTATACTAGCCATCCTAACAACCCTATTCC  
TAGGGACCATGCTCGTCTAATCAGCTCTCACTGGCTAATGATTTGAATTGGATTCGAGATA  
AACATACTAGCAATAGTCCCTATCCTAATGAAAAACTTTAGCCACGGGCCATAGAAGCAGC  
CACAAAATACTTCCTAATCCAAGCCACCGCGTCCATACTACTAATGCTAGCCATTACCCTAG  
ACCTGATATCTTCTGGACAATGAACCATCACAAAAACACACAACACCCTGCCATCAGCCATC  
ATCACCGTATCTATGGCCATAAACTAGGAATAGCACCATTCCACTTCTGAGTGCCAGAAGT  
AACACAAGGAAGCCCACTATCATCAGGCATGCTACTCCTAACCTGACAAAAAGTCGCACCA  
ATATCAATCCTATACCAAATAATACCCACAATCAACACAAATATACTAACAACCATAGCCGC  
ACTCTCAATCCTCATCGGCGGTTGAGGAGGGCTAAACCAGACCCAACCTACGAAAAATCATA  
GCATACTCCTCAATCGCCACATAGGCTGAATAGCAATAATCATGACATACAACCCGGACAT  
TGCCATTCTAAACCTACTAGTCTACATCATAATGACACTATCTATATTGCAATCCTACTATA  
CAACTCATCAACAACAACCTATCACTATCCCACCTATCAAACAAGACACCACTAATCACAG  
CCCTCGCACTACTAATCCTACTATCACTAGGGGGCCTCCCCCACTGACCGGATTCATGCCC  
AAATGAATAATCATCCAAGAACTAACCAAAAACAACATAGTAATAATACCAACCGTGATAG  
CAATAACAGCACTACTCAACCTATACTTCTACGTACGCCTGGCGTACTCCACAGCACTAACC  
ATACTCCCAACTACCAACAACATAAAAAATAAAATGACAATTCGAAACAACAAAAATCATAA  
AACTAACCCACCTCTAATCATTTTATCCACAATAGCACTCCCACTCACCCCTATAATATCAA

TCCTAAACTAGGGACTTAGGCTACACAGACCGAGAGCCTTCAAAGCTCTAAGCAAATACAA  
ACTATTTAGTCCCTGATATAAAGACTGTAGAAATTCAACCTACATCACCTAAACGCAAATCA  
GGCGCTTTAATTAAGCTAAATCCTCACTAGATTGGTGGGATACAAACCCACGAAACTTTAGT  
TAACAGCTAAACACCCTAATCAACTGGCTTCAATCTACTTCTCCCGCCATAAAAAAGAAAGT  
GGCGGGAGAAGTCCGGGCAGAATTGAAGCTGCTTCTTTGAATTTGCAATTCAATGTGTAAAC  
ACCTCAGGACCTGGCAAGAAGAGGACTCCAACCTCTGTGTTTACAGTTTACAGTCTAATGCTT  
ACTCGGCCATCTTACCTATGTTTACCAACCGCTGGCTCTTTTCAACAAATCACAAAGACATTG  
GCACACTATATCTCTTATTTGGCGCCTGGGCCGGAATAGTAGGCACCGCACTAAGTCTTCTA  
ATTCGCGCTGAGCTAGGTCAGCCTGGGACCCTCTTAGGGGACGACCAAATTTACAATGTGAT  
CGTTACCGCACATGCATTTGTAATAATCTTCTTCATAGTCATGCCAATCATAATCGGGGGCTT  
TGGAAGCTGACTAGTGGCCCTGATAATTGGAGCCCCTGACATGGCATTCCCCCGTATAAACA  
ACATAAGTTTCTGACTGCTCCCCCCTCTTTCCTACTTCTTCTGGCCTCTTCCATAGTCGAAGC  
AGGGGCTGGAACCGGCTGAACTGTATACCCCCCTTTAGCAGGAACTTAGCACACGCAGGA  
GCATCTGTAGACCTAACCATCTTCTCTCTTCATCTAGCGGGTGTCTCATCAATCCTTGGGGCT  
ATCAATTTTATTACAACAATCATCAACATAAAAACCCCCTGCAATAAACCAATACCAAACCCC  
ACTATTCGTGTGATCAGTCCTAATTACGGCCGTGCTTCTGCTACTATCTCTACCCGTACTAGC  
CGCTGGCATTACCATACTGTTAACCGACCGTAATCTAAATACAACCTTTTTTGACCCCGCAG  
GAGGAGGTGACCCATTCTATACCAACACCTATTCTGATTCTTCGGACACCCCGAAGTGTAC  
ATTCTCATCCTTCTGGATTTGGAATAATCTCCACATCGTAACCTATTACTCCGGGAAAAAA  
GAGCCCTTTGGATACATGGGCATAGTCTGAGCAATAATATCCATTGGCTTCCTGGGCTTCATT  
GTATGGGCACACCACATGTTTACAGTGGGAATAGACGTTGATACACGGGCCTACTTCACATC  
AGCCACCATAATTATTGCTATCCCCACTGGAGTAAAGGTGTTTAGTTGACTAGCAACCCTGC  
ACGGAGGAAACGTAAAATGGGCCCCAGCTATACTATGGGCCCTGGGCTTTATCTTCTGTTT  
ACAGTCGGGGGTCTAACTGGCATCGTGCTGGCCAACTCGTCCCTAGATATCGTCCTCCATGA  
TACCTACTACGTAGTAGCCCACTTCCACTACGTTCTCTCCATGGGAGCAGTTTTCGCCATCAT  
AGGAGGCTTCGTCCATTGATTCCCCCTGTTCTCAGGATACACGCTCAACAACACATGGGCAA  
AAGTTCACCTTTACAATCATATTCTGTGGGCGTAAACATGACCTTTTTCCCCCAACACTTCCTTG  
GACTGTCTGGAATACCTCGACGATACTCGGACTACCCAGACGCTTACACAATGTGAAACACT  
GTGTCCTCCATAGGATCCTTCATCTCATTAAACCGCCGTAATACTCATGGCCTTCATAATCTGA  
GAGGCATTTCGCTCTAAACGGGAAGTCCTAATAGTGGAGTCCACAAATACCAACCTCGAAT  
GACTACACGGCTGCCCACCACCCTACCACACATTTCGAAGAACCTGCTTTCGTAAATCTGGTC  
AAAACAAGAGAGGAAGGAATCGAACCCCTCAAACAATGGTTTCAAGCCAATATCATAACCCC  
TATGTCTCTCTCAATCACAGAAGTATTAGTAAAATTTACATAACTTTGTCAAAGTTAAATTAT  
AGGTTCAAGCCCTTTATACTTCCATGGCGTACCCGCTCCAATTAGGCTTTCAAGATGCCACAT  
CCCCAATCATAGAAGAATTACTCCACTTCCACGATCACACACTAATAATCGTGTTCTTGATC  
AGCTCCCTAGTACTATACATTATCTCTCTCATACTAACAACCAAACCTACCCACACAAGTAC  
AATAGACGCTCAAGAAGTAGAAACCATTTGAACCATCCTCCCCGCAATTATCCTAATCCTAA  
TCGCCCTGCCCTCCCTACGCATCCTCTACATAATGGACGAGATTAACAACCCCGCCCTGACA  
GTAAAAACAATGGGCCATCAATGATACTGAAGCTACGAATACACAGACTACGAAGACCTAA  
GCTTCGACTCATACATAATCCCAACTCAAGACCTAAAACCCGGCGAACTCCGACTTCTAGAA  
GTGGACAACCGACTTGTAATACCCATAGACACAACCATCCGCATGCTCATCTCATCTGAAGA  
CGTCTGCACTCTTGAGCCATCCCATCCCTGGGCCTAAAAACAGATGCTATCCCGGGGCGTC  
TAAACCAAACAACCCCTGATATCAACCCGGCCCGGCCTATTCTACGGACAGTGCTCAGAAATC  
TGTGGCTCAAATCACAGCTTCATGCCAATTGTCCTCGAACTAGTACCCCTAAAAACATTTGA  
AACTGAACTACGTCCCTACTGTAATTCATTGAGAAGCTAATAGCGCTAGCCTTTTAAGTTA  
GAGATTGAGAGCACGCCTCTCCTCAATGACATGCCTCAACTAGACACTACAACATGATCCAT  
TACAATTATATCCATGATTCTGACCCTCTTTGTCTATTCCAATTAATAAATCTCTAAACACTA  
CTACCCGCACGACGCAGAGACCTCAACAAAAACACACCACAAAACACTCACCCCTGAGAA  
AAAAAATGAACGAAAATCTATTACCTCTTTCATTACCCAGTAATAATAGGGATCCCTATT  
GTAACAATTATCATTATGTTCCAGTAATCCTCTTCCCAACATCAAACCGACTAATCAACAA  
CCGCATTGTATCCATACAACAATGACTCCTAAAACAAACATCCAAACAAATAATAAGCATCC

ACAACTACAAAGGACAGACCTGAACCCTGATATTAATAACACTAATCATTTTCATCGCATCT  
ACTAACCTACTAGGCCTGCTACCCCACTCATTACCCCCACAGCCCAACTGTCAATAAACCT  
GAGCATAGCCGTTCTCTATGGGCAGCCACCGTAGTCACAGGTTTTTCGACACAATACAAAAA  
CATCTTTAGCCCACTTCCTACCCCAAGGGAACACCAACCCCCCTTATCCCAGTGCTAGTGATCA  
TTGAAACAATCAGCCTGCTAATCCAACCCATAGCGCTCGCAGTACGACTGACAGCCAACATC  
ACCGCCGGCCACCTGTTAATACACCTAATCGGAAGCGCAACCCTTGCCCTAATATCAATCAA  
CCTCACCGTGGCCACAACCTACCTTCATCGTCCTAGTCCTGCTTACAATCCTTGAATTCGCAGT  
CGCACTCATTAGGCCTACGTATTCCTCTTCTAATCAGCCTCTACTTACATGATAACACATA  
ATGACCCACCAAACCCACTCATAACCACATAGTAAACCCAAGCCCTTGACCCCTAACCGGGGC  
CCTATCTGCCCTCCTAATAACATCGGGCCTAGCAATATGATTCCACTTCAACTCTACAATACT  
ACTCCTCCTAGGACTAACAACGAACCTCTTAACAATATATCAATGATGGCGTGACATTGTAC  
GAGAAAGCACCTTTCAAGGCCACCACACACCCACAGTCCAAAAAGGACTACGATACGGCAT  
AATCCTCTTCATTGTCTCAGAAGTATTTTTCTTCGCTGGCTTCTTCTGAGCATTCTACCACTCA  
AGCCTAGCACCTGCCCCCGAACTAGGAGGATGCTGACCCCCCACAGGCATCAACCCGCTAA  
ACCCACTGGAAGTACCTCTACTCAACACATCCGTTCTTTTAGCCTCAGGAGTATCAATTACAT  
GGGCACACCATAGCTTAATAGAAGGCAGCCGAAACCACATAACCCAGGCCCTGCTCATCAC  
AATCCTCCTAGGCATTTACTTCACACTACTGCAGGTCTCAGAATATTACGAAGCACCCCTTCAC  
AATCTCCGACGGCGTGTACGGCTCTACCTTCTTTGTGGCAACTGGATTCCACGGCCTACACGT  
CATCATCGGCACCTCCTTCCTAACTGTGTGCCTACTACGACAATAAAATACCACTTTACATC  
AAACCACCACTTCGGATTTCGAAGCTGCCGCCTGATACTGACACTTCGTAGATGTAGTGTGAC  
TGTTCTGTATGTCTCCATTTACTGATGAGGTTCTATTTTTCTAAGTATGCACAGTACAGTTG  
ACTTCCAATCAACAAGCTCTGGCCACAACCCAGAAGAGAATAATAAACCTACTCCTAGCAAT  
AACAACAACACCATACTAGCATGCCTGCTCATACTAATCGCCTTCTGACTCCCTCAATTAA  
ACACGTACTCGGAAAAAATCACCCCTACGAATGCGGATTTCGACCCCATGGGATCGGCACG  
ACTACCATTCTCCATAAAATTCTTCCTAATCGCCATCACGTTCTACTATTTCGACCTAGAAAT  
CGCACTACTCCTGCCACTCCCCTGAGCATCACAAACAACCAACCTAGGCACCATAATCACCG  
TAGCCTTGGCCCTCATCCTACTGCTAGCAATTAGCCTGACCTACGAATGAACACAAAAAGGC  
CTAGAATGAACTGAGTATGGTAGCTAGTTTACACAAAAACAATGATTTTCGACTCATTAACT  
ATGACTTACTCATAGCTACCAAATGTCCCTAATTTACATTAAACACAACACTGGCATTCACTAT  
CTCCCTAATGGGGATATTAATGTACCGATCACACCTAATGTCCTCACTACTATGTCTAGAGG  
GCATAATACTCTCCCTATTCGTAATAATCACCATTAATCCTAACTAACCACTTCACACTAG  
CCAACATAGCACCCATCATCCTCCTCGTACTAGCAGCATGCGAGGCTGCCCTAGGCCTCTCT  
CTACTAGTACTTGTATCTAACACATACGGCACGGACTACGTACAAAACCTAAACCTGCTACA  
ATGCTAAACTAATTGTCCCCACAGCCATACTAATTTCCCTAACATGACTATCGAACAAAAA  
CATAGTGTGAATCAACGTAACATCACACAGCATGCTAATCAGCCTAACATCTCTAGGCATCT  
TGGGCCAGCATGACCACAACAACATAAGCCTCTCAGCCATCTTCTTCTCTGACCCCTATCA  
GCACCCTTAATCGTATTAACAACATGACTCCTCCCCCTAATACTAACAGCCAGCCAAGCCCA  
CCTCTCCAATGAGCCCCTGGGCCTAAAAAACTATACATTACCATACTAATCACCCCTCCAAG  
CACTACTAATCATAACATTCGCCTCCTCTGAGTTCATTATATTCTACATCCTATTTGAAGCAA  
CACTCGTACCAACCCTAATCATCATCACACGATGAGGAAACCAAGCAGAGCGACTAAACGC  
AGGGTCTACTTCTCTTCTACACAATAGTAGGGTCACTCCCCCTTCTAGTAGTACTCACATA  
CACCCAAAACATAACAGGAACCTAAACATACTAGTACTACAATACTGAGCGAAACCCATA  
AACGACTCTTGATCCAACATGCTAATATGACTAGCATGCATAATAGCATTATAGTAAAAAT  
ACCCCTATACGGACTACACCTCTGACTGCCAAAAGCCCACGTAGAGGCCCCCATTCGAGGCT  
CCATAGTACTTGCAGCCGTACTACTAAAACCTAGGCGGATACGGCATAATACGCATCACTATC  
ATGCTAGAACCAATAACAACATTCATAGCATACCCCTTCCTAATACTATCCCTGTGAGGAAT  
AATCATAACAAGCTCCATCTGCCTTCGCCAAACCGACCTAAAATCACTAATCGCCTACTCCT  
CCGTAAGCCACATAGCACTGGTAATCGTCGCAATCCTAATCCAAACCCCATGAAGCTACATA  
GGGGCCACCGCCCTCATAATCGCCCACGGTCTAACATCCTCCATACTATTTTGCCTAGCAAA  
CACAACTATGAGCGAACCCACAGCCGAACCTATAATACTAGCACGAGGACTGCAAACCCCTC  
CTACCCCTAATAGCTGCCTGATGACTCCTAGCAAGCCTAACCAACCTGGCCCTCCCCCCCAG

CATCAACCTAATCGGAGAACTATTTCGTAGTAGTATCAACATTCTCGTGGTCTAACACCACCA  
TCATCCTTACTGGAACAAACATTATCATCACAGCCACCTACTCCCTATACATACTAATATCCA  
CCCAACGTGGAAAATACACCCACCACATCAACAACATCTGCCCCTCCTTCACCCGAGAAAAAC  
GCTCTAATGGCACTCCACATACTGCCCCTACTAATGCTATCAACCAACCCCAAAATCATCCT  
AGGGTGCCTTTACTGTAAGTATAGTTTAATAAAACCTCAGATTGTGGATCTGACAATAGAAG  
ACCACAACCTTCTTACTTACCAAAAAAGCATGCAAGAACTGCTAATTCCTGCCCCCATGTATA  
AAAACATGGCTTTTTTAACTTTTAGAGGATGACAGACACCCGTTGGTCTTAGGAACCAAAA  
GACTTGGTGCAACTCCAAGTAAAAGTAATTAACACCCTAACCTGCACCTCCCTTATAACACT  
AACAACACTAATCATACCAATCATAATCACCCCCACAAATGCCTACACAAGCAAAAACTAC  
CCCCACCACGTAAAAAACATAGTCGCACTAGCCTTCGCCGTCAGCATAATCCCAGCAATAGC  
ATTTATCTACTCAAACGAAGAAATAACCATCTTCAACTGACACTGAACAACAATCCAAACAA  
TAAAAATAACAATAAGCTTCAAACCTAGACTATTTCTCCACAACATTCATACCAGTGGCCCTA  
TTCGTCACATGGTCTATCATAGAATTCTCTCTATGATATATAAAATCAGACCCCCACATCAAC  
CGATTCTTCAAGTACCTACTAATCTTCCTAATCACAATAATAATCCTAGTATCCGCCAACAAC  
ATATTCCAACTCTTCATCGGCTGAGAAGGAGTAGGAATCATATCTTTCCTCCTAATCGGCTG  
ATGGCACGACGAACAGATGCAAACACAGCAGCCATACAAGCCATCCTATACAACCGCATC  
GGAGACATTGGACTAATCCTGTCAATGGCATGATTCCTCACAAACCTAAACTCATGGGACCT  
CCAACAAATCCTCATGCTAAACCCCGAGAACACAAACATCCCCCTAGCGGGCCTACTACTAG  
CAGCAACTGGAAAATCCGCACAATTTGGGCTACACCCATGACTCCCCTCAGCCATAGAAGGC  
CCAACCCAGTATCAGCCCTACTCCACTCCAGCACAAATAGTAGTCGAGGGGTATTCCTACT  
AATCCGATTCCACCCCTAATAGAAAACAACAAACAATCCAAACAACAACCTATGCCTA  
GGGGCCATTACAACCTGTTACAGCCATCTGTGCTCTACCCAAAACGACATCAAAAAGAT  
CGTGGCCTTCTCAACCTCAAGCCAACCTAGGTCTAATAATAGTCACCATCGGAATCAACCAAC  
CACACCTAGCCTTCATACACATCTGCACCCACGCCTTCTTCAAAGCCATACTATTCATGTGCT  
CCGATCGATCATCCACAGCCTAAACGACGAACAAGACATCCGCAAAATAGGAGGACTTTT  
CCACGCCCTCCCCACTACCACCTCCGCTCTCATTATTGGCAGCCTAGCCCTAACAGGAACCC  
CATTCCTAACAGGCTTCTACTCTAAAGACCTAATCATCGAAACCGCTAACATATCCCACACA  
AACGCCTGAGCCCTGCTCATCACACTAGTAGCCACCTCCCTCACAGCCGCCTACAGCACACG  
AATCATCTTCTTCACACTATTAGGACAACCCCGATCCAACACCCTAATCAACATCAACGAAA  
ACAACCCCTCACTAACAAACCCAATCAAACGCCTAATGCTAGGGAGCATCTTCGCCGGATTCT  
CTACTATACAACAACATCCCCCAACAACCATGCCCCAAACAACCATACCACAATACCTAAA  
ATACACCGCCCTCACCACCACAATCCTAGGCCTAATCATAGCCCTAGAACTGTGCAACCTGT  
CCCTAAACCTAAGCCACAAACCCCCCTCAAGTGCCTTCAAATTCTCAACCTTACTAGGCTAC  
TTCCCCACAATCATTCACCGCTCAGGACCCCTCTGATCACTAACAACAAGCCAAAAACTAGC  
ATCCCTTATTCTAGACCTAATCTGACTAGAAAATATTATACCAAAGTCAATCTCACACTTCCA  
CATAAAAGCCTCCTTAATAACATCCAACCAAAAAGGCTCAATCAAACCTATACTTCCTGTCT  
TCGCAGTAACAATAATCCTCGCTCTCCTCATATTCTATTCCCCCGAGTAACCTCCATAACAAC  
AACAACACAAATAAACAAGACCACCCGGTCATAATCACAACCAAGCACCATGACTATAA  
AGAGCAGCAACACCCGCAGCTTCCTCACTAAAAAACTAGACCCCCCAACATCATAAGTCG  
CCCAATCACCAGGACCACCAAGATCAAAAACCACACTCAACCCCTCACCTTCAACATATAA  
AGCACCAAAACCAACTCTATGACCACACCCAAAAACAAGCACCAGCACAAACCACATTAG  
ACACCCAAACTTCAGGATACTCCTCAATGGCTATGGCCGCCGTATAACCAAAAAACAACCAAC  
ATCCCCCAAGATAAATCAAAAAAACCATTAAACCCAAAAAAGACCCACCAAAATTAACCTA  
CAACCCCAACCTGCACCGCCAGCTACAACCAGACTAAACCCCCCATAAATAGGAGAAGG  
CTTTGAGGAAAACCTAAAAAACTAATCACA AAAAATAACACTCAAATAAACACAACATAT  
GTCATTATTCCCACATGGACTCAAACCATGACCTATGACACGAAAAATCATCGTTGTAATTA  
AACTACGGAACCTAATGACAAACATCCGAAAAACACACCCCTACTCAAATCATCAACA  
ACTCCTTTATTGATCTCCCCACCCCTCTAACATCTCAGCATGATGAACTTCGGATCACTAC  
TAGGAATTTGCTTAGTCCTACAAATTCTCACAGGACTATTTCTAGCCATACACTACACAGCA  
GACACAGCAACCGCATTCTCATCAGTAACCTCACATCTGCCGAGATGTAAACTACGGATGAAT  
TATCCGATACATACACGCTAACGGAGCTTCCTGTTCTTCATCTGCCTATTTCGCACACATCGG

ACGAGGCATCTACTACGGATCCTTTGCCTACAAAGAGACATGAAACATCGGTATCCTGCTCC  
TGTTTGCAGTAATAGCAACAGCCTTTATGGGATACGTCCTACCATGAGGACAAATGTCCTTC  
TGAGGTGCTACAGTAATTACAAACCTTTTATCCGCAATACCCTACATCGGGTCTAGCCTAGT  
AGAGTGAGTCTGAGGGGGATTCTCGGTAGACAAAGCAACTCTCACTCGATTCTTCGCTCTTC  
ACTTCATCCTTCCCTTCGTAATTCTTGCCCTAGTACTAGTACACTTACTATTCTTACACGAAA  
CCGGATCCAACAACCCAATAGGAATCGTATCCAACCCCGACGTAATCCCCTTCCACCCATAC  
TACACAGCCAAGGACACCCTTGGCCTATTCATCATGCTCACAGCACTAATATCCTTAGCCCT  
ATTCTTCCCCGACCTACTAGGAGACCCAGACAATTATACACCCGCAAACCCCTAAACACAC  
CACCCACATCAAACCAGAATGGTACTTCCTATTTCGCATACGCAATCCTACGCTCAATTCCC  
AACAATTTGGGAGGAGTACTAGCACTAATCCTATCCATCCTCGTACTAGCACTAATCCCACT  
ACTACACACATCAAAACAACGAACTATAATGTTCCGACCCCTGAGCCAAACCATCTTCTGAC  
TCCTGGTGGCCGACCTACTAGTTCTCATATGAATCGGAGGACAACCCGTGGAACACCCCTTC  
ATCCTAATCGGACAAGTGGCCTCTATCCTTTATTTACACTAATCCTAGCAGCAATGCCAATC  
GCAGGTATTATCGAAAACAATCTCATAAAATGAAGAGTCTTTGTAGTATATGTCAATACACT  
GGTCTTGTAACCAGCAAAGGAATTAACCCCTCCCCAAGACTCAGGAAGAAGACAAAAGCCC  
TACCATCAGCACCCAAAGCTGAAATTCTCAATAAACTACTTCCTGCAAACAATTAAGTCCA  
ACAAGCTTTATATAGTATATGCCATGTATAATCGTGCATTAAATGGTTTGGCCCATGCATATAA  
GCAGGTACATTATATTATTATAGTACATAGGACATATTATGTATAATCGTGCATTATTGATCT  
AGTACATACATATAAGCAGGTACATTATATTATTATAGTACATAGGACATATTATGTATAAT  
CGTGCATTATTGATCTAGTACATGCATATAAGCAGGTACATAATATCCTTAGAGTACATAGT  
ACATATTATTATTGATCGGACATAGCACATCAAGTCAAATCATTTCAGTCAACATGCGTAT  
CCCTACCACTGAAGGCCGCTAATCACCATGCCGCGTGAAATCATCAACCCGCTCATAGTCG  
TGTCCTCTTCTCGCTCCGGGCCCATATGGACTGTGGGGTAGTTAAAGTGAACTATACCTG  
GCATCTGGTTCTTACTTCATGTTTCATCTTATATCTAGCCGCTCACTCGTTCCTCTTAAATAAGA  
CATCTCGATGGATTAATTACTAATCAGCCCATGCCTAACATAACTGTGCTGTATGCCTTTGG  
TATCTTTTAATTTTCGGGGTGCGAGGTTCAACTGGGTCACCGACCTTCGAGCAGGTGGATAA  
CTTGTAGATAGACATTCAATTGAATATTATTGGTCGTACATACTAACTCCTAGGTGTTATTAG  
TCAATGGTTACAGGACATAGAGAATTTTACAACAAAATTTTGAGTTGAGCCTACAGAAATCA  
TAGATCACAATCGCAGACACCAACAAATACTAAAGTAATTAATTTAAATTTATAATTTAGG  
TTTGATATATCAAACCCCCCTTACCCCCCAAAGCCTCCACGTACTAAACATCTTGTCAAAC  
CCCAAAGCAAGAATACACACGTACACAAAGGCGCTATAAGCACAAAGTATTACGTAAGTA  
TATAGATATACAAACTACTAGCGCAGCTTTCTGTCCACTAGTTAAATACTTAGGTGCTTGA  
ACATATATGGCTGGAAGGCCATGTAGTGGCTACGTAATGATTTCTATTAGCCACAATAAAAA  
CAATATACAATAAATACAAATATAGATCAATTCTTATAGGCGCCGATAGCATAAACTATCTG  
CCCCCTATGTACAATTGAATTAAA

>SRR7498027 (circular) REORGANIZED

GTTAATGTAGCTTAAACCAAAGCAAAGCATTGAAAATGCTTAGATGAGTCCACAAACTCC  
ATAAACACACAGGTTTGGTCCCAGCCTTTTTATTAATTTTCAATAGGATTACACATGCAAGTA  
TCCGCCCCCAGTGAAGATGCCCTTCAAGTTATCACAGTACCTGAAGGAGCTGGCATCAAGC  
ACGCCAATAAACGCAGCTAACGACGCCTTGACAGAGCCACACCCCCACGGGAAACAGCAGTG  
ATAAAAATTAGGCTATAAACGAAAGTTTCGACCTAGCCATATTGCATTGGGTTGGTAAATCTC  
GTGCCAGCCACCGCGGTCATACGATTAACCCTAGCTAATAAAAAACCGGCGTAAAGCGTG  
TAAGATAAATCCAATCCAAATAAAGTTAAGCCCTGACCAGGCCGTAAAAAGCCGTGGTTAC  
CGTAAAAATAAACTACGAAAGTAACTTTAATTACATCGACACACGATAGCTAAGACCCAA  
ACTGGGATTAGATACCCCACTATGCTTAGCCCTAAACCTAAATAATTACACAGACAAAATTA  
TTCGCCAGAGAACTACTGGCAACAGCCTAAAACTCAAAGGACTTGGCGGTGCTTTACATCCC  
CCTAGAGGAGCCTGTTCTGTAATCGATAAACCCCGATAAACCTACCAATTCTAGCTAATAC  
AGCCTATATACCGCCATCTCCAGCAAACCTAAAAAGGAAGCACAGTAAGCAAGACTATGA  
AAACATAAATACGTTAGGTCAAGGTGTAGCCCATGAATTGGGAAGAAATGGGCTACATTTTC  
TAAAAATAGAACACAAACGAACGCCCTAATGAAAACGAGGGCCAAAGGAGGATTTAGCAGT  
AAGCTGAGAATAGAAAGCTCAACTGAACCCGGCCCTAAAGCACGCACACACCGCCCGTCAC



CCTCTTCAAATCCCCAAGAATACCTAAACATATTAGACAAACACCAAGGCATGAGAAGAGA  
CAAGTCGTAACAAGGTAAGCATACTGGAAGGTGTGCTTGGATCACCAAAGTGTAGCTTAAA  
CAAAGCATCTGGCCTACACCCAGAAGATCTCAATAACATGACCACTTTGAACAAATCCTAGC  
CCAACCAACACCCAACATACAACCAAACAGAGCACATAAACCAAAGCATTTACTAGACTAA  
AGTATAGGCGATAGAAATTACACAACGGCGCTATAGAAAAAGTACCGCAAGGGAAAGATG  
AAAGATGCATTCAAAGTACAAAAAAGCAAAGATTACCCCTTGTACCTTTTGCATAATGGACT  
AACTAGAAACACCCTAGCAAAGAGAACTTAAGCTAGAAACCCCGAAACCAGACGAGCTACC  
TACGAGCAGTTTAAAGAACCCACTCATCTATGTGGCAAAATAGTGAGAAGACTTGTAGGTA  
GAGGTGAAAAGCCTAACGAGCCTGGTGATAGCTGGTTGTCCAAGAAATGAATCTAAGTTCA  
ACTTGAAGCATACCCAAAAGCCCCAAAACTATAATGTAGGCTTCAAGTATAGTCTAAAAAG  
GTACAGCTTTTTTAGAAACAGAAATTAATCTTAATTAGTGAGTAAACAATAACAACCATAG  
TTGGCCTAAAAGCAGCCATCAATTAAGAAAGCGTCAAAGCTCAACAATAAGACATAAATAA  
TACCACAAATAAAAAATCAACTCCTAAACCAATATTGGACCAATCTATCAATAAATAGAAGA  
AATACTGTTAGTATGAGTAACAAGAAATAGATCTCCTTGCACAAGCTTATATCAGAACGGAT  
GACCCACTGATAATTAACAACGAAACAAATCAAACCCAAAAATAGAACTTTGTAAATAGA  
TTGTTAACCCAACACAGGCGTGCATATTCTCAAAGGAAAGGTTAAAAACAAATGAAAGGAAC  
TCGGCAAACACAAGCCCCGCCTGTTTACCAAAAACATCACCTCTAGCATAACCAGTATTAGA  
GGCACTGCCTGCCAGTGACTCGCGTTAAACGGCCGCGGTATTCTGACCGTGCAAAGGTAGC  
ATAATCACTTGTTCTCTAAATAAGGACTAGTATGAACGGCTAGACGAGGGTTTTACTGTCTC  
TCATCTGTAACCAGTGAAATTGACCTCCCCGTGAAGAGGCGGGAATAATATAATAAGACGA  
GAAGACCCTATGGAGCTTTAATTAACAGCTTAAAATTAACCCAACACCACTCTAACAGAGA  
TATAACAAACCAATTAGCCTAAGCTGTCAATTTTGGTTGGGGTGACCTCGGAGCAAAAAACA  
ACCTACGAGCGGTCAAATCCAGACTAACAAGTCCAGATAATCCGTTAATTGATCCAACAACCT  
TGATCAACGGAACAAGTTACCCTAGGGATAACAGCGCAATCCTATTCGAGAGTCCATATCGA  
CAATAGGGTTTACGACCTCGATGTTGGATCAGGACATCCCAATGGTGCAGAAGCTATTAATG  
GTTTCGTTTGTTC AACGATTAAAGTCCTACGTGATCTGAGTTCAGACCGGAGTAATCCAGGTC  
GGTTTCTATCTATTAATACACTTCTCCCAGTACGAAAGGACAAGAGAAGTAGGGCCTACCTC  
ACACAGGCGCCCTCGAATCAATAAATGACTACCCTCTTAATTTAGCCAATTCCACAACAACCC  
CCAGTCCTAGAACCAAGGGCCAGCTAGGGTAGCAAAGCACGGCAACTGCACAAGACTTAAGC  
TCTTGTAACAGAGGTTCAACTCCCCTCCCTAGCAGCAATGTACACAATCAACATAATAATAA  
TGATCATCCCCATCCTACTAGCCGTGGCATTCTAACGCTAGTAGAACGCAAAGTGCTAGGA  
TACATGCAACTACGAAAGGGCCCAAACATCGTGGGGCCCTTGAGGCCTGCTACAACCAATCG  
CCGACGCAGTAAACTATTCACTAAAGAACCCCTACGACCCCTAACATCCTCAATCACAATA  
TTCATCATGGCACCTATCCTAGCACTGACACTCGCACTCACCATGTGAGTACCACTACCAAT  
GCCACACCCACTAGTCAACATAAACCTAGGAGTGCTATTCTACTGGCCATATCAAGCCTCG  
CCGTATACTCCATCTTATGATCAGGATGAGCCTCAAACCTCCAAATACGCCCTCATTGGAGCA  
CTACGTGCAGTGGCCCAAACCATCTCATACGAAGTGACACTAGCAATTATCCTGCTGTCCTT  
ACTGTTAATAAGCGGGTCCTTCACCCTCTCCACCCTAATCACAACCCAAGAAAAGCTATGAT  
TACTAGTGCCCGCATGACCCCTGGCCATAATATGATTCTCGACCCCTAGCCGAGACAAAT  
CGAGCACCCCTTCGACCTAACAGAAGGAGAATCTGAACTCGTATCCGGCTTTAACGTTGAATA  
CGCAGCAGGCCCCATTCGCACTCTTCTTCCTTGCCGAATACGCAAACATCATCATAATAAACA  
TCTTGTCAGTGACACTCTTCATAGGAGCCTTTCACGACCCCCACACCCCAAGCCTCTACACA  
GTTAATTTTGTAGTAAAAACACTCGCCCTTACCGCCCTATTCTATGAATCCGAGCATCCTAC  
CCACGATTCCGCTACGACCAACTAATGCACCTACTATGAAAAAATTCCTACCACTAACCCCT  
AGCACTGTGCATGTGACACGTATCAATACCAATCGCCCTGTCAAGCATTCCCCCACAATCAT  
AAGAAATATGTCTGACAAAAGAATTACTTTGATAGAGTAAATAATAGAGGTTTAAATCCCCT  
TATTTCTAGAAAAACAGGCATTGAACCTGCACCTGAGAACTCAAAAATCTCCGTGCTACCAA  
CTTACACCACAATCTACAGTAAGGTCAGCTAAGCAAGCTATCGGGCCCATAACCCCGAAAATG  
TTGGATCACAACCTTCCCGTACTAATAAACCTCACTATACTAGCCATCCTAACACCCCTATT  
CTAGGGACCATGCTCGTCCTAATCAGCTCTCACTGACTAATGATTTGAATTGGATTTCGAGAT  
AAACATACTAGCAATAGTCCCTATCCTAATGAAAAACTTTAGCCCACGAGCCATAGAAGCA

GCCACAAAATACTTCCTAATCCAAGCCACCGCGTCCATACTACTAATGCTAGCCATTACCCT  
AGACCTGATATCTTCTGGACAATGAACCATCACAAAAACACACAACACCCTACCATCAGCCA  
TCATCACCGTAGCTATGGCCATAAACTAGGAATAGCACCATTCCACTTCTGAGTGCCAGAA  
GTAACACAAGGAAGCCCACTATCATCAGGCATGCTACTCCTAACCTGACAAAAAGTCGCAC  
CAATATCAATCCTATACCAAATAATACCCACAATCAACACAAATATACTGACAACCATAGCC  
GCACTCTCAATCCTCATCGGCGGTTGAGGAGGGCTAAACCAGACCCAACTACGAAAAATCA  
TAGCATACTCCTCAATCGCCACATAGGCTGAATAGCAATAATCATAACATAACAACCCGGAC  
ATTGCCATTCTAAACCTACTAGTCTACATCATAATGACACTATCTATATTCGCAATCCTACTA  
TACAACCTCATCAACAACAACCCTATCACTATCCCACCTATCAAACAAGACACCACTAATCAC  
AGCCCTCGCACTACTAATCCTACTATCACTAGGAGGCCTCCCCCACTGACCGGATTTCATGC  
CCAAATGAATAATCATCCAAGAACTAACCAAAAAACAACATAGTAATAATACCAACCGTGAT  
AGCAATAACAGCACTACTCAACCTATACTTCTACGTACGCCTGGCGTACTCCACAGCACTAA  
CCATACTCCCAACCACCAACAACATAAAAAATAAAATGACAATTGCAAACAACAAAAATCAT  
AAAATAACCCACCTCTAATCATTTTTATCCACAATAGCACTCCCACTCACCCCTATAATATC  
AATCCTAACTAGGGACTTAGGCTACACAGACCGAGAGCCTTCAAAGCTCTAAGCAAATAC  
AACTATTTAGTCCCTGATATAAAGACTGTAGAAATTCAACCTACATCACCTAAACGCAAAT  
CAGGCGCTTTAATTAAGCTAAATCCTCACTAGATTGGTGGGATACAAACCCACGAAACTTTA  
GTTAACAGCTAAACACCCTAATCAACTGGCTTCAATCTACTTCTCCCGCCATAAAGAAGAAA  
GTGGCGGGAGAAGTCCGGGCAGAATTGAAGCTGCTTCTTTGAATTTGCAATTCAATGTGTAA  
ACACCTCAGGACCTGGCAAGAAGAGGACTCCAACCTCTGTGTTTACAGTTTACAGTCTAATGC  
TTACTCGGCCATCTTACCTATGTTACCAACCGCTGGCTCTTTTCAACAAATCACAAAGACAT  
TGGCACACTATATCTCTTATTTGGCGCCTGGGCGGAATAGTAGGCACCGCACTAAGTCTTC  
TAATTCGCGCTGAGCTAGGTCAGCCTGGGACCCTCTTAGGGGACGACCAAATTTACAATGTG  
ATCGTTACCGCACATGCATTTGTAATAATCTTCTTCATAGTCATGCCAATCATAATCGGAGGC  
TTTGAAACTGACTAGTACCCCTGATAATTGGAGCCCCTGACATGGCATTCCCCCGTATAAA  
CAACATAAGTTTCTGACTGCTCCCCCCTCTTTCTACTTCTTCTGGCCTCTTCCATAGTCGAA  
GCAGGGGCTGGAACCGGCTGAAGTGTATACCCCCCTTAGCAGGAAATTTAGCACACGCAG  
GAGCATCTGTAGACCTAACCATCTTCTCTCTTCATCTAGCGGGTGTCTCATCAATCCTTGGGG  
CTATCAATTTTATTACAACAATCATCAACATAAAACCCCTGCAATAAACCAATACCAAACC  
CCACTATTCGTGTGATCAGTCCTAATTACGGCCGTGCTTCTGCTACTATCTCTACCCGTACTA  
GCTGCTGGCATTACCATACTGTAAACCGACCGTAATCTAAATACAACCTTTTTTGACCCCGCA  
GGAGGAGGGGACCCCATCTATACCAACACCTATTCTGATTCTTCGGACACCCCGAAGTGTA  
CATTCTCATCCTTCCTGGATTGGAATAATCTCCACATCGTAACCTATTACTCCGGGAAAAA  
AGAGCCCTTTGGATACATGGGCATAGTCTGAGCAATAATATCCATTGGCTTCCTGGGCTTCA  
TTGTATGGGCACACCACATGTTACAGTGGGAATAGACGTTGATACACGGGCCTACTTCACA  
TCAGCCACCATAATTATTGCTATCCCCACTGGAGTAAAGGTGTTTAGTTGACTAGCAACCCT  
GCACGGAGGAAACGTAAAATGGGCCCCAGCTATACTATGGGCCCCTGGGCTTTATCTTCCTGT  
TTACAGTCGGGGGTCTAACTGGCATCGTGCTGGCCAACTCGTCCCTAGATATCGTCCTCCAT  
GATACCTACTACGTAGTAGCCCACTTCCACTACGTTCTCTCCATGGGAGCAGTTTTCGCCATC  
ATAGGAGGCTTCGTCCATTGATTCCCCTGTTCTCAGGATACACGCTCAACAACACATGGGC  
AAAAGTTCACTTTACAATCATATTCGTGGGCGTAAACATGACCTTTTTCCCCCAACACTTCCT  
TGGGCTGTCTGGAATACCTCGACGATACTCGGACTACCCAGACGTTACACAATGTGAAACA  
CTGTGTCTCCATAGGATCCTTCATCTCATTAAACCGCCGTAATACTCATGGCCTTCATAATCT  
GAGAGGCATTCGCCTCTAAACGGGAAGTCCTAATAGTGGAGTCTACAAATACCAACCTCGA  
ATGACTACACGGCTGCCACCACCCTACCACACATTCGAAGAACCTGCTTTCGTAAATCTGG  
TCAAAACAAGAGAGGAAGGAATCGAACCTCAAACAATGGTTTCAAGCCAATATCATAGCC  
CCTATGTCTCTCTCAATCACAGAAGTATTAGTAAAATTTACATAACTTTGTCAAAGTTAAATT  
ATAGGTTCAAGCCCTTTATACTTCCATGGCGTACCCGCTCCAATTAGGCTTTCAAGATGCCAC  
GTCCCAATCATAGAAGAATTACTCCACTTCCACGATCACACACTAATAATCGTGTTCTTGAT  
CAGCTCCCTAGTACTATACATTATCTCTCTCATACTAACAACCAAACCTCACCCACACAAGTA  
CAATAGACGCTCAAGAAGTAGAAACCATTTGAACCATCCTCCCCGCAGTTATCCTAATCCTA

ATCGCCCTGCCCTCCCTACGCATCCTCTACATAATGGACGAGATTAACAACCCCGCCCTGAC  
AGTAAAAACAATGGGCCATCAATGATACTGAAGCTACGAATACACAGACTACGAAGACCTA  
AGCTTCGACTCATACATAATCCCAACTCAAGACCTAAAACCCGGCGAACTCCGACTTCTAGA  
AGTGGACAACCGACTTGTACTACCCATAGACACAACCATCCGCATGCTCATCTCATCTGAAG  
ACGTCCTGCACTCTTGAGCCGTCCCATCCCTGGGCCTAAAAACAGATGCTATCCCGGGGCGT  
CTAAACCAAACAACCCCTGATATCAACCCGGCCCGGCCTATTCTACGGACAGTGCTCAGAAAT  
CTGTGGCTCAAATCACAGCTTCATGCCAATTGTCCTCGAACTAGTACCCCTAAAAACATTTG  
AAAACCTGAACTACGTCCCTACTGTAATTCATTGAGAAGCTAATAGCGCTAGCCTTTTAAGTT  
AGAGATTGAGAGCACGCCTCTCCTCAATGACATGCCTCAACTAGACACTACAACATGATCCA  
TTACAATTATATCCATGATCCTGACCCTCTTTGTCTATTCCAATTAATAATCTCTAAACACT  
ACTACCCACACGACGCAGAGACCTCAACAAAAACACACCACAAAACACTCACCCCTGAGA  
AAAAAATGAACGAAAATCTATTCACCTCTTTCATTACCCAGTGATAATAGGGATCCCTAT  
TGTAACAATTATCATTATGTTCCCAGTAATCCTCTTCCCAACATCAAACCGACTAATCAACAA  
CCGCATTGTATCCATACAACAATGACTCCTAAAACAAACATCCAAACAAATAATAAGCATCC  
ACAACACAAAGGACAGACCTGAACCCTGATATTAATAACACTAATCATTTTCATCGCATCT  
ACTAACCTACTAGGCCTGCTACCCCACTCATTACCCCCACAGCCCACTGTCAATAAACCT  
GAGCATAGCCGTTCTCTATGGGCAGCCACCGTAGTCACAGGTTTTTCGACACAATACAAAAA  
CATCTTTAGCCCACTTCCTACCCCAAGGGAACACCAACCCCTTATCCCAGTGCTAGTGATCA  
TTGAAACAATCAGCCTGCTAATCCAACCCATAGCGCTCGCAGTACGACTGACAGCCAACATC  
ACCGCCGGCCACCTGTTAATACACCTAATCGGAAGCGCAACCCCTTGCCCTAATATCAATCAA  
CCTCACCGTGCCACAACTACCTTCATCGTCTTAGTCCTGCTTACAATCCTTGAATTCGCAGT  
CGCACTCATTAGGCCTACGTCTTACCCCTTCTAATCAGCCTCTACTTACATGATAACACATA  
ATGACCCACCAAACCCACTCATACCACATAGTAAACCCAAGCCCTTGACCCCTAACCGGGGC  
CCTATCTGCCCTCCTAATAACATCGGGCCTAGCAATATGATTCCACTTCAACTCTACAACACT  
ACTCCTCCTAGGACTAACAACAAACCTCTTAACAATATATCAATGATGACGTGACATTGTAC  
GAGAAAGCACCTTTCAAGGCCACCACACACCCACAGTCCAAAAAGGACTACGATACGGCAT  
AATCCTGTTCAATTGTCTCAGAAGTATTTTTCTTCGCTGGCTTCTTCTGAGCATTCTACCACTCA  
AGCCTAGCACCTACCCCGAACTAGGAGGATGCTGACCCCCACAGGCATCAACCCGCTAA  
ACCCACTGGAAGTACCTCTACTCAACACATCCGTTCTTTTAGCCTCAGGAGTATCAATTACAT  
GGGCACACCATAGCTTAATAGAAGGCAGCCGAAACCACATAATCCAGGCCCTGCTCATCAC  
AATTCTCCTAGGCATTTACTTCACACTACTGCAGGTCTCAGAATATTACGAAGCACCCCTTCAC  
AATCTCCGACGGCGTGTACGGCTCTACCTTCTTTGTGGCAACTGGATTCCACGGCCTACACGT  
CATCATCGGCACCTCCTTCTAATGTGTGCCTACTACGACAACTAAAATACCACTTTACATC  
AAACCACCACTTCGGATTTCGAAGCTGCCGCCTGATACTGACACTTCGTAGATGTAGTGTGAC  
TGTTCTGTATGTCTCCATTTACTGATGAGGTTCTTATTTTCTAAGTATGCACAGTACAGTTG  
ACTTCCAATCAACAAGCTCTGGCCACAACCCAGAAGAGAATAATAAACCTACTCCTAGCAAT  
AACAACAAACACCATACTAGCATGCCTGCTCATACTAATCGCCTTCTGACTCCCTCAATTAA  
ACACGTACTCGGAAAAGATCACCCCTACGAATGCGGATTTCGACCCCATGGGATCGGCACG  
ACTACCATTCCTCATAAAATTCTTCCTAATCGCCATCACGTTCTACTATTTCGACCTAGAAAT  
CGCACTACTCCTGCCACTCCCCTGAGCATCACAAACAAACAACCTAGGCACCATAATCACCG  
TAGCCTTGGTCTCATCCTACTGCTAGCAATTAGCCTGGCCTACGAATGAACACAAAAAGGC  
CTAGAATGAACTGAGTATGGTAGCTAGTTTACACAAAAACAAATGATTTTCGACTCATTAACCT  
ATGACTTACTCATAGCTACCAAATGTCCCTAATTTACATTAAACACAACACTGGCATTCACTAT  
CTCCCTAATGGGGATATTAATGTACCGATCACACCTAATGTCCTCACTACTATGTCTAGAGG  
GCATAATACTCTCCCTATTCGTAATAATCACCATTACAATCCTAACTAACCATTTCACACTAG  
CCAACATAGCACCCATCATCCTCCTCGTACTAGCAGCATGCGAGGCTGCCCTAGGCCTCTCT  
CTACTAGTACTTGTATCTAACACATACGGCACGGACTACGTACAAAACCTAAACCTGCTACA  
ATGCTAAAATAATTGTCCCCACAGCCATACTAATCCCCTAACATGACTATCGAACAAAAA  
CATAGTGTGAATCAACGTAACATCACACAGCATGCTAATCAGCCTAACATCTCTAGGCATCT  
TGGGCCAGCATGACCACAACAACATAAGCCTCTCAGCCATCTTCTTCTCTGACCCCTATCA  
GCACCCTTAATCGTATTAACAACATGACTCCTCCCCCTAATACTAACAGCCAGCCAAGCCCA

CCTCTCCAATGAGCCCCTGGGCCTAAAAAACTATACATTACCATACTAATCACCCCTCCAAG  
CACTACTAATCATAACATTTCGCCTCCTCTGAGTTCATTATATTCTACATCCTGTTTGAAGCAA  
CACTCGTACCAACCCTAATCATCATCACACGATGAGGAAACCAAGCAGAGCGACTAAACGC  
AGGGTCCTACTTCTCTTCTACACAATAGTAGGATCACTCCCCCTTCTAGTAGTACTCACATA  
CACCCAAAACATAACAGGAACCCTAAACATACTAGTACTACAATACTGAGCGAAACCCATA  
AACGACTCTTGATCCAACATGCTAATATGACTAGCATGCATAATAGCATTTCATAGTAAAAAT  
ACCCCTATACGGACTACACCTCTGACTGCCAAAAGCCCACGTAGAGGCCCCCATTGCAGGCT  
CCATAGTACTTGCAGCCGTACTACTAAAAGTAGGCGGATACGGCATAATACGCATCACTATC  
ATGCTAGAACCAATAACAACATTCATAGCATACCCCTTCCTAATACTATCCCTGTGAGGAAT  
AATCATAACAAGCTCCATCTGCCTTCGCCAAAACCGACCTAAAATCACTAATCGCCTACTCCT  
CCGTAAGCCACATAGCACTGGTAATCGTCGCAATCCTAATCCAAACCCCATGAAGCTACATG  
GGGGCCACCGCTCTCATAATCGCCCACGGTCTAACATCCTCCATACTATTTTGCCTAGCAAA  
CACAACTATGAGCGAACCACAGCCGAACATAATACTAGCACGAGGACTGCAAACCCCTC  
CTACCCCTAATAGCTGCCTGATGACTCCTAGCAAGCCTAACCAACCTGGCCCTCCCCCCCAG  
CATCAACCTAATCGGAGAACTATTTCGTAGTAGTATCAACATTCTCGTGGTCCAACACCACCA  
TCATCCTTACTGGAACAAACATTATCATCACAGCCACCTACTCCCTATACATACTAATATCCA  
CCCAACGTGGAAAATACACCCACCACATCAACAACATCTGCCCCTCCTTCACCCGAGAAAAAC  
GCTCTAATGGCACTCCACATACTGCCCCTACTAATGCTATCAACCAACCCCAAAAATCATCCT  
AGGGTGCCTTTACTGTAAGTATAGTTTAATAAAAACCTCAGATTGTGGATCTGACAATAGAAG  
ACCACAACCTTCTTACTTACCAAAAAAGCATGCAAGAACTGCTAATTCTGCCCCCATGTATA  
AAAACATGGCTTTTTTAACTTTTATAGAGGATGACAGACACCCGTTGGTCTTAGGAACCAAAA  
GACTTGGTGCAACTCCAAGTAAAAGTAATTAACACCCTAACCTGCACCTCCCTTATAACACT  
AACAACACTAATCATACCAATCATAATCACCCCCACAAATGCCTACACAAGCAAAAACTAC  
CCCCACCACGTAAAAAACATAGTCGCACTAGCCTTCGCCGTCAGCATAATCCCAGCAATAGC  
ATTTATATACTCAAACGAAGAAATAACCATCTTCAACTGACACTGAACAACAATCCAAACAA  
TAAAAATAACAATAAGCTTCAAACCTAGACTATTTCTCCACAACATTTCATACCAGTGGCCCTA  
TTCGTACATGGTCTATCATAGAATTCTCTCTATGATATATAAAAATCAGACCCCCACATCAAC  
CGATTCTTCAAGTACCTACTAATCTTCCTAATCACAATAATAATCCTAGTATCCGCCAACAAAC  
ATATTCCAACCTCTTCATCGGCTGAGAAGGAGTAGGAATCATATCTTTCTCCTAATCGGCTG  
ATGGCACGGACGAACAGATGCAAACACAGCAGCCATACAGGCCATCCTATACAACCGCATC  
GGAGACATTGGACTAATCCTGTCAATGGCATGATTCCTCACAAACCTAAACTCATGGGACCT  
CCAACAAATCCTCATGTAAACCCCGAGAACACAAACATCCCCCTAGCGGGCCTACTACTAG  
CAGCAACTGGAAAATCCGCACAATTTGGGCTACACCCATGACTCCCCTCAGCCATAGAAGGC  
CCAACCCAGTATCAGCCCTACTCCACTCCAGCACAAATAGTAGTCGCAGGGGTATTCTACT  
AATCCGATTCCACCCCTAATAGAAAACAACAAAACAATCCAAACAACAACCCATATGCCTA  
GGGGCCATTACAACCTGTTACAGCCATCTGTGCTCTCACCCAAAACGACATCAAAAAGAT  
CGTGGCCTTCTCAACCTCAAGCCAAGTCTAATAATAGTCACCATCGGAATCAACCAAC  
CACACCTAGCCTTCATACACATCTGCACCCACGCCTTTTTTCAAAGCCATACTATTATGTGCT  
CCGGATCGATCATCCACAGCCTAAACGACGAACAAGACATCCGCAAAAATAGGAGGACTTTT  
CCACGCCCTCCCCACTACCACCTCCGCTCTCATTATTGGCAGCCTAGCCCTAACAGGAACCC  
CATTCCTAACAGGCTTCTACTCTAAAGACCTAATCATCGAAACCGCTAACATATCCCACACA  
AACGCCTGAGCCCTGCTCATCACTAGTAGCCACCTCCCTCACAGCCGCCTACAGCACACG  
AATCATCTTCTTCACACTATTAGGACAACCCCGATCCAACACCCTAATCAACATCAACGAAA  
ACAACCCCTCACTAACAAACCCAATCAAACGCCTAATGCTAGGGAGCATCTTCGCCGGATTCT  
CTACTATACAACAACATCCCCCAACAACCATGCCCAAAACAACCTATAACCACAATACCTAAA  
ATACACCGCCCTCGCCACTACAATCCTAGGCCTAATCATAGCCCTAGAACTGTGCAACCTGT  
CCCTAAACCTAAGCCACAAACCCCCCTCAAGTGCCTTCAAATTCTCAACCTTACTAGGCTAC  
TTCCCCACAATCATTCACCGCTCAGGACCCCTCTGATCACTAACAACAAGCCAAAAACTAGC  
ATCCCTTATTCTAGACCTAATCTGACTAGAAAATATCATACCAAAGTCAATCTCACACTTCCA  
CATAAAAGCCTCCCTAATAACATCCAACCAAAAAGGCTCAATCAAACCTATACTTCTGTCTCT  
TCGCAGTGACAATAGTCCTCGCTCTCCTCATATTCTATTCCCCCGAGTAACCTCCATAACAAC

AACAACACAAATAAACAAAGACCACCCGGTCATAATCACAAACCAAGCACCATGGCTATAA  
AGAGCAGCAACACCCGCGAGCTTCCTCACTAAAAAACTAGACCCCCAACATCATAAGTCG  
CCCAATCACCAGGACCACCAAGATCAAAAACCACACTCAACCCCTCACCTTCAACATATAA  
AGCACTAAAACCAACTCTATGACCACACCCAAAACAAAAGCACCGAGCACAACCACATTAG  
ACACCCAAACTTCAGGATACTCCTCAATGGCTATGGCCGCCGTATAACCAAAAACAACCAAC  
ATCCCCCAAGATAAATCAAAAAAACCATTAAACCCAAAAAAGACCCACCAAAATTAACTA  
CAACCCCAACCTGCACCGCCAGCTACAACCAGACTAAACCCCCCATAAATAGGAGAAGG  
CTTTGAAGAAAACCTAAAAAACTAATCACAAAAATAACACTCAAAATAAACACAACATAT  
GTCATTGTTCCACATGGACTCAAACCATGACCTATGACACGAAAAATCATCGTTGTAATTA  
AACTACGGAAACCTAATGACAAACATCCGAAAAACACACCCCTACTCAAAATCATCAACA  
ACTCCTTTATTGATCTCCCCACCCCTCTAACATCTCAGCATGATGAACTTCGGATCACTAC  
TAGGAATCTGCTTAGTCCTACAAATTCTCACAGGACTATTTCTAGCCATACACTACACAGCA  
GACACAGCAACCGCATTCTCATCAGTAACTCACATCTGCCGAGATGTAACTACGGATGAAT  
TATCCGATACATACAGCTAACGGAGCTTCCCTGTTCTTCATCTGCCTATTTCGCACACATCGG  
ACGAGGCATCTACTACGGATCCTTTGCCTACAAAGAGACATGAAACATCGGTATCCTGCTCC  
TATTTGCAGTAATAGCAACAGCCTTTATGGGATACGTCCTACCATGAGGACAAATGTCCTTC  
TGAGGTGCTACGGTAATTACAAACCTTTTATCCGCAATACCCTACATCGGGTCTAGCCTAGT  
AGAGTGAGTCTGAGGGGGATTCTCGGTAGACAAAGCAACTCTCACTCGATTCTTCGCTCTTC  
ACTTCATCCTTCCCTTCGTAATTCTTGCCCTAGTACTAGTACACTTACTATTCTTACACGAAA  
CCGGATCCAACAACCCAATAGGAATCGTATCCAACCCCGACGTAATCCCCTTCCACCCATAC  
TACACAGCCAAGGACACCCCTTGGCCTATTCATCATGCTCACAGCACTAATATCCTTAGCCCT  
ATTCTTCCCCGACCTACTAGGAGACCCAGACAATTATACACCCGCAAACCCCTAAACACAC  
CACCCACATCAAACCAGAATGGTACTTCCTATTTCGCATACGCAATCCTACGCTCAATTCCC  
AACAAATTGGGAGGAGTACTAGCACTAATCCTATCCATCCTCGTACTAGCACTAATCCCACT  
ACTACACACATCAAACAACGAACTATAATGTTCCGACCCCTGAGCCAAACCATCTTCTGAC  
TCCTGGTGGCCGACCTACTAGTTCTCACATGAATCGGAGGACAACCCGTGGAACACCCCTTC  
ATCCTAATCGGACAAGTAGCCTCTATCCTTTATTTACACTAATCCTAGCAGCAATGCCAATC  
GCAGGTATCATCGAAAACAATCTCATAAAATGAAGAGTCTTTGTAGTATATGTCAATACACT  
GGTCTTGTAACACAGCAAAGGAATTAACCCCTCCCCAAGACTCAGGAAGAAGACAAAAGCCC  
TACCATCAGCACCCAAAGCTGAAATTCTCAATAAACTACTTCCTGCAAACAATTAAGTCCA  
ACAAGCTTTATATAGTATATGCCATGTATAATCGTGCATTAAATGGTTTGCCCCATGCATATAA  
GCAGGTACATTATATTATTATAGTACATAGGACATATTATGTATAATCGTGCATTATTGATCT  
AGTACATACATATAAGCAGGTACATTATATTATTATAGTACATAGGACATATTATGTATAAT  
CGTGCATTATTGATCTAGTACATGCATATAAGCAGGTACATAATATCCTTAGAGTACATAGT  
ACATATTATTATTGATCGGACATAGCACATCAAGTCAAATCATTTCCAGTCAACATGCGTAT  
CCCTACCACTGAAGGCCGCTAATCACCATGCCGCGTGAAATCATCAACCCGCTCATAGTCG  
TGTCCCTCTTCTCGCTCCGGGCCCATACGGACTGTGGGGTAGTTAAAGTGAACTATACCTG  
GCATCTGGTTCTTACTTCATGTTTCATCTTATATCTAGCCGCTCACTCGTTCCCTCTTAAATAAGA  
CATCTCGATGGATTAATTAATAATCAGCCCATGCCTAACATAACTGTGCTGTCATGCCTTTGG  
TATCTTTTAATTTTCGGGGTGCGAGGTTCAACTGGGTCACCGACCTTCGAGCAGGTTGATAA  
CTTGATAGATAGACATTCATTGAATATTATTGGTCGTACATACTAACTCCTAGGTGTTATTCAG  
TCAATGGTTACAGGACATAGAGAATTTTACAACAAAATTTTGAGTTGAGCCTACAGAAATCA  
TAGATCACAAATCGCAGACACCAACAAATACTAAAGTAATTAATTTAAATTTATAATTTTAGG  
TTTGATATATCAAACCCCCCTTACCCCCCAAAGCCTCCACGTACTAAACATCTTGTCAAAC  
CCCAAAGCAAGAATACACACGTACACAAAGGCGCTATAAGCACAAAGTATTACGTAAGTA  
TATAGATATACAAACTACTAGCGCAGCTTCTGTCCACTAGTTAAATACTTAGGTGCTTGA  
ACATATATGGCTGGAAGGCCATGTAGTGACTACGTAATGATTCCTATTAGCCACAATAAAAA  
CAATATACAATAAATACAAATATAGATCAATTCTTATAGGCGCCGATAGCATAAACTATCTG  
CCCCCTATGTACAATTGAATTAAA

>SRR7507293 (circular) REORGANIZED

GTTAATGTAGCTTAAAACCAAAGCAAAGCATTGAAAATGCTTAGATGAGTCCACAAACTCC  
ATAAACACACAGGTTTGGTCCCAGCCTTTTTATTAATTTTCAATAGGATTACACATGCAAGTA  
TCCGCCCCCAGTGAAGATGCCCTTCAAGTTATCACAGTACCTGAAGGAGCTGGCATCAAGC  
ACGCCAATAAACGCAGCTAACGACGCCTTGCAGAGCCACACCCCCACGGGAAACAGCAGTG  
ATAAAAATTAGGCTATAAACGAAAGTTCGACCTAGCCATATTGCATTGGGTTGGTAAATCTC  
GTGCCAGCCACCGCGGTCATACGATTAACCCTAGCTAATAAAAAACCGGCGTAAAGCGTGC  
TAAGATAAATCCAATCCAAATAAAGTTAAGCCCTGACCAGGCCGTAAAAAGCCGTGGTTAC  
CGTAAAAATAAACTACGAAAGTAACTTTAATTACATCGACACACGATAGCTAAGACCCAA  
ACTGGGATTAGATACCCCACTATGCTTAGCCCTAAACCTAAATAATTCACCAGACAAAATTA  
TTCGCCAGAGAACTACTGGCAACAGCCTAAAACTCAAAGGACTTGGCGGTGCTTTACATCCC  
CCTAGAGGAGCCTGTTCTGTAATCGATAAACCCCGATAAACCTACCAATTCTAGCTAATAC  
AGCCTATATACCGCCATCTCCAGCAAACCCTAAAAAGGAAGCACAGTAAGCAAGACTATGA  
AAACATAAATACGTTAGGTCAAGGTGTAGCCCATGAATTGGGAAGAAATGGGCTACATTTTC  
TAAAAATAGAACACAAACGAACGCCCTAATGAAAACGAGGGCCAAAGGAGGATTTAGCAGT  
AAGCTGAGAATAGAAAGCTCAACTGAACCCGGCCCTAAAGCACGCACACACCGCCCGTCAC  
CCTCTTCAAATCCCCAAGAATACCTAAACATATTAGACAAACACCAAGGCATGAGAAGAGA  
CAAGTCGTAACAAGGTAAGCATACTGGAAGGTGTGCTTGGATCACCAAAGTGTAGCTTAAA  
CAAAGCATCTGGCCTACACCCAGAAGATCTCAATAACATGACCCTTTGAACAAATCCTAGC  
CCAACCAACACCCAACATACAACCAAAACAGAGCACATAAACCAAAAGCATTTACTAGACTAA  
AGTATAGGCGATAGAAATTACACAACGGCGCTATAGAAAAAGTACCGCAAGGGAAAGATG  
AAAGATGCATTCAAAGTACAAAAAAGCAAAGATTACCCCTTGTACCTTTTGCATAATGGACT  
AACTAGAAACACCCTAGCAAAGAGAACTTAAGCTAGAAACCCCGAAACCAGACGAGCTACC  
TACGAGCAGTTTAAAGAACCCTCATCTATGTGGCAAAATAGTGAGAAGACTTGTAGGTA  
GAGGTGAAAAGCCTAACGAGCCTGGTGATAGCTGGTTGTCCAAGAAATGAATCTAAGTTCA  
ACTTGAAGCATACCCAAAAGCCCCAAAACCTATAATGTAGGCTTCAAGTATAGTCTAAAAAG  
GTACAGCTTTTTAGAAACAGAATTAAATCTTAATTAGTGAGTAAACAATACAACAACCATAG  
TTGGCCTAAAAGCAGCCATCAATTAAGAAAGCGTCAAAGCTCAACAATAAGACATAAATAA  
TACCACAAATAAAAAATCAACTCCTAAACCAATATTGGACCAATCTATCAATAAATAGAAGA  
AATACTGTAGTATGAGTAACAAGAAATAGATCTCCTTGCACAAGCTTATATCAGAACGGAT  
GACCCACTGATAATTAACAACGAAACAAATCAAACCCAAAAATAGAACTTTGTAAATAGA  
TTGTTAACCCAACACAGGCGTGCATATTCTCAAAGGAAAGGTTAAAACAAATGAAAGGAAC  
TCGGCAAACACAAGCCCCGCCTGTTTACCAAAAACATCACCTCTAGCATAACCAGTATTAGA  
GGCACTGCCTGCCCAGTGACTCGCGTTAAACGGCCGCGGTATTCTGACCGTGCAAAGGTAGC  
ATAATCACTTGTTCTCTAAATAAGGACTAGTATGAACGGCTAGACGAGGGTTTTACTGTCTC  
TCATCTGTAACCAGTGAAATTGACCTCCCCGTGAAGAGGCGGGAATAATATAATAAGACGA  
GAAGACCCTATGGAGCTTTAATTAAACAGCTTAAAATTAACCCAACACCACTCTAACAGAGA  
TATAACAAACCAATTAGCCTAAGCTGTCAATTTTGGTTGGGGTGACCTCGGAGCAAAAAACA  
ACCTACGAGCGGTCAAATCCAGACTAACAAAGTCCAGATAATCCGTTAATTGATCCAACAAC  
TGATCAACGGAACAAGTTACCCTAGGGATAACAGCGCAATCCTATTCGAGAGTCCATATCGA  
CAATAGGGTTTACGACCTCGATGTTGGATCAGGACATCCCAATGGTGCAGAAGCTATTAATG  
GTTTCGTTTGTTCACGATTAAAGTCCTACGTGATCTGAGTTCAGACCGGAGTAATCCAGGTC  
GGTTTCTATCTATTAATACACTTCTCCCAGTACGAAAGGACAAGAGAAGTAGGGCCTACCTC  
ACACAGGCGCCCTCGAATCAATAAATGACTACCCTCTTAATTTAGCCAATTCACAACAACCC  
CCAGTCCTAGAACAGGGGCCAGCTAGGGTAGCAAAGCACGGCAACTGCACAAGACTTAAGC  
TCTTGTAACAGAGGTTCAACTCCCCTCCCTAGCAGCAATGTACACAATCAACATAATAATAA  
TGATCATCCCCATCCTACTAGCCGTGGCATTCTAACGCTAGTAGAACGCAAAGTGCTAGGA  
TACATGCAACTACGAAAGGGCCCAAACATCGTGGGCCCTTGAGGCCTGCTACAACCAATCG  
CCGACGCAGTAAAACTATTCACTAAAGAACCCCTACGACCCCTAACATCCTCAATCACAATA  
TTCATCATGGCACCTATCCTAGCACTGACACTCGCACTACCATGTGAGTACCACTACCAAT  
GCCACACCCACTAGTCAACATAAACCTAGGAGTGCTATTCTACTGGCCATATCAAGCCTCG  
CCGTATACTCCATCTTATGATCAGGATGAGCCTCAAACCTCCAAATACGCCCTCATTGGAGCA

CTACGTGCAGTGGCCCAAACCATCTCATAACGAAGTGACACTAGCAATTATCCTGCTGTCCTT  
ACTGTTAATAAGCGGGTCCTTCACCCTCTCCACCCTAATCACAACCCAAGAAAAGCTATGAT  
TACTAGTGGCCGCATGACCCCTGGCCATAATATGATTTCATCTCGACCCTAGCCGAGACAAAT  
CGAGCACCCCTTCGACCTAACAGAAGGAGAATCTGAACTCGTATCCGGCTTTAACGTTGAATA  
CGCAGCAGGCCCATTTCGACTCTTCTTCCTTGCCGAATACGCAAACATCATCATAATAAACA  
TCTTGTCAGTGACACTCTTCATAGGAGCCTTTACGACCCCCACACCCCAAGCCTCTACACA  
GTTAATTTTGTAGTAAAAACACTCGCCCTTACCGCCCTATTCTATGAATCCGAGCATCCTAC  
CCACGATTCCGCTACGACCAACTAATGCACCTACTATGAAAAAACTTCCTACCACTAACCCCT  
AGCACTGTGCATGTGACACGTATCAATACCAATCGCCCTGTCAAGCATTCCCCCACAATCAT  
AAGAAATATGTCTGACAAAAGAATTACTTTGATAGAGTAAATAATAGAGGTTTAAATCCCCT  
TATTTCTAGAAAAACAGGCATTGAACCTGCACCTGAGAACTCAAAAATCTCCGTGCTACCAA  
CTTACACCACAATCTACAGTAAGGTCAGCTAAGCAAGCTATCGGGCCCATACCCCGAAAATG  
TTGGATCACAACCTTCCCGTACTAATAAACCTCACTATACTAGCCATCCTAACAAACCCTATT  
CTAGGGACCATGCTCGTCCTAATCAGCTCTCACTGACTAATGATTTGAATTGGATTTCGAGAT  
AAACATACTAGCAATAGTCCCTATCCTAATGAAAAACTTTAGCCACGAGCCATAGAAGCA  
GCCACAAAATACTTCCTAATCCAAGCCACCGCGTCCATACTACTAATGCTAGCCATTACCCT  
AGACCTGATATCTTCTGGACAATGAACCATCACAAAAACACACAACACCCTACCATCAGCCA  
TCATCACCGTAGCTATGGCCATAAACTAGGAATAGCACCATTCCACTTCTGAGTGCCAGAA  
GTAACACAAGGAAGCCCACTATCATCAGGCATGCTACTCCTAACCTGACAAAAAGTCGCAC  
CAATATCAATCCTATACCAAATAATACCCACAATCAACACAAATATACTGACAACCATAGCC  
GCACTCTCAATCCTCATCGGCGGTTGAGGAGGGCTAAACCAGACCCCACTACGAAAAATCA  
TAGCATACTCCTCAATCGCCACATAGGCTGAATAGCAATAATCATAACATACAACCCGGAC  
ATTGCCATTCTAAACCTACTAGTCTACATCATAATGACACTATCTATATTCGCAATCCTACTA  
TACAACCTCATCAACAACAACCCTATCACTATCCACCTATCAAACAAGACACCCTAATCAC  
AGCCCTCGCACTACTAATCCTACTATCACTAGGAGGCCTCCCCCACTGACCGGATTTCATGC  
CCAAATGAATAATCATCCAAGAACTAACCAAAAAACAACATAGTAATAATACCAACCGTGAT  
AGCAATAACAGCACTACTCAACCTATACTTCTACGTACGCCTGGCGTACTCCACAGCACTAA  
CCATACTCCCAACCACCAACAACATAAAAAATAAAATGACAATTCGAAACAACAAAAATCAT  
AAAATAACCCCACTCTAATCATTTTATCCACAATAGCACTCCCACTCACCCCTATAATATC  
AATCCTAACTAGGGACTTAGGGCTACACAGACCGAGAGCCTTCAAAGCTCTAAGCAAATAC  
AACTATTTAGTCCCTGATATAAAGACTGTAGAAATTCAACCTACATCACCTAAACGCAAAT  
CAGGCGCTTTAATTAAGCTAAATCCTCACTAGATTGGTGGGATACAAACCCACGAACTTTA  
GTTAACAGCTAAACACCCTAATCAACTGGCTTCAATCTACTTCTCCCGCCATAAAGAAGAAA  
GTGGCGGGAGAAAGTCCGGGCAGAATTGAAGCTGCTTCTTTGAATTTGCAATTCAATGTGTAA  
ACACCTCAGGACCTGGCAAGAAGAGGACTCCAACCTCTGTGTTTACAGTTTACAGTCTAATGC  
TTACTCGGCCATCTTACCTATGTTACCAACCGCTGGCTCTTTTCAACAAATCACAAAGACAT  
TGGCACACTATATCTCTTATTTGGCGCCTGGGCCGGAATAGTAGGCACCGCACTAAGTCTTC  
TAATTCGCGCTGAGCTAGGTCAGCCTGGGACCCTCTTAGGGGACGACCAAATTTACAATGTG  
ATCGTTACCGCACATGCATTTGTAATAATCTTCTTCATAGTCATGCCAATCATAATCGGAGGC  
TTTGGAAGTGAAGTACTACCCCTGATAATTGGAGCCCCTGACATGGCATTCCTCCCGTATAAA  
CAACATAAGTTTCTGACTGCTCCCCCCTCTTTCCTACTTCTTCTGGCCTCTTCCATAGTCGAA  
GCAGGGGCTGGAACCGGCTGAAGTGTATACCCCCCTTTAGCAGGAAATTTAGCACACGCAG  
GAGCATCTGTAGACCTAACCATCTTCTCTCTTCATCTAGCGGGTGTCTCATCAATCCTTGGGG  
CTATCAATTTTATTACAACAATCATCAACATAAAACCCCTGCAATAAACCAATACCAAACC  
CACTATTTCGTGTGATCAGTCCTAATTACGGCCGTGCTTCTGCTACTATCTCTACCCGTA  
GCTGCTGGCATTACCATCTGTTAACCGACCGTAATCTAAATACAACCTTTTTTGACCCCGCA  
GGAGGAGGGGACCCATTCTATACCAACACCTATTCTGATTCTTCGGACACCCCGAAGTGTA  
CATTCTCATCCTTCTGATTGGAATAATCTCCACATCGTAACCTATTACTCCGGGAAAAA  
AGAGCCCTTTGGATACATGGGCATAGTCTGAGCAATAATATCCATTGGCTTCTGGGCTTCA  
TTGTATGGGCACACCACATGTTACAGTGGGAATAGACGTTGATACACGGGCCTACTTCACA  
TCAGCCACCATAATTATTGCTATCCCCACTGGAGTAAAGGTGTTTAGTTGACTAGCAACCCT

GCACGGAGGAAACGTAAAATGGGCCCCAGCTATACTATGGGCCCCTGGGCTTTATCTTCCTGT  
TTACAGTCGGGGGTCTAACTGGCATCGTGCTGGCCAACTCGTCCCTAGATATCGTCCTCCAT  
GATACCTACTACGTAGTAGCCCACTTCCACTACGTTCTCTCCATGGGAGCAGTTTTTCGCCATC  
ATAGGAGGCTTCGTCCATTGATTCCTCCCTGTTCTCAGGATACACGCTCAACAACACATGGGC  
AAAAGTTCACTTTACAATCATATTTCGTGGGCGTAAACATGACCTTTTTCCCCAACACTTCCT  
TGGGCTGTCTGGAATACCTCGACGATACTCGGACTACCCAGACGCTTACACAATGTGAAACA  
CTGTGTCCTCCATAGGATCCTTCATCTCATTAACCGCCGTAATACTCATGGCCTTCATAATCT  
GAGAGGCATTTCGCCTCTAAACGGGAAGTCCTAATAGTGGAGTCTACAAATACCAACCTCGA  
ATGACTACACGGCTGCCACCACCCTACCACACATTTCGAAGAACCTGCTTTTCGTAAATCTGG  
TCAAAACAAGAGAGGAAGGAATCGAACCTCAAACAATGGTTTCAAGCCAATATCATAGCC  
CCTATGTCTCTCTCAATCACAGAAGTATTAGTAAAATTTACATAACTTTGTCAAAGTTAAATT  
ATAGGTTCAAGCCCTTTATACTTCCATGGCGTACCCGCTCCAATTAGGCTTTCAAGATGCCAC  
GTCCCCAATCATAGAAGAATTACTCCACTTCCACGATCACACACTAATAATCGTGTTCTTGAT  
CAGCTCCCTAGTACTATACATTATCTCTCTCATACTAACAACCAAACCTCACCCACACAAGTA  
CAATAGACGCTCAAGAAGTAGAAACCATTTGAACCATCCTCCCCGCAGTTATCCTAATCCTA  
ATCGCCCTGCCCTCCCTACGCATCCTCTACATAATGGACGAGATTAACAACCCCGCCCTGAC  
AGTAAAAACAATGGGCCATCAATGATACTGAAGCTACGAATACACAGACTACGAAGACCTA  
AGCTTCGACTCATACATAATCCCAACTCAAGACCTAAAACCCGGCGAACTCCGACTTCTAGA  
AGTGGACAACCGACTTGTACTACCCATAGACACAACCATCCGCATGCTCATCTCATCTGAAG  
ACGTCCTGCACTCTTGAGCCGTCCCATCCCTGGGCCTAAAAACAGATGCTATCCCGGGGCGT  
CTAAACCAAACAACCTGATATCAACCCGGCCCGGCCTATTCTACGGACAGTGCTCAGAAAT  
CTGTGGCTCAAATCACAGCTTCATGCCAATTGTCCTCGAACTAGTACCCCTAAAAACATTTG  
AAAAGTGAACCTACGTCCCTACTGTAATTCATTGAGAAGCTAATAGCGCTAGCCTTTTAAGTT  
AGAGATTGAGAGCACGCCTCTCCTCAATGACATGCCTCAACTAGACACTACAACATGATCCA  
TTACAATTATATCCATGATCCTGACCCTCTTTGTCTATTCCAATTAAAAATCTCTAAACACT  
ACTACCCACACGACGCAGAGACCTCAACAAAAACACACCACAAAACACTCACCCCTGAGA  
AAAAAAATGAACGAAAATCTATTCACCTCTTTCATTACCCAGTGATAATAGGGATCCCTAT  
TGTAACAATTATCATTATGTTCCCAGTAATCCTCTTCCCAACATCAAACCGACTAATCAACAA  
CCGCATTGTATCCATACAACAATGACTCCTAAAACAAACATCCAAACAAATAATAAGCATCC  
ACAACCTACAAAGGACAGACCTGAACCCTGATATTAATAACACTAATCATTTTCATCGCATCT  
ACTAACCTACTAGGCCTGCTACCCCACTCATTACCCCCACAGCCCACTGTCAATAAACCT  
GAGCATAGCCGTTCTCTATGGGCAGCCACCGTAGTCACAGGTTTTTCGACACAATACAAAAA  
CATCTTTAGCCCACTTCCTACCCCAAGGGAACACCAACCCCCCTTATCCCAGTGCTAGTGATCA  
TTGAAACAATCAGCCTGCTAATCCAACCCATAGCGCTCGCAGTACGACTGACAGCCAAACATC  
ACCGCCGGCCACCTGTTAATACACCTAATCGGAAGCGCAACCCCTTGCCCTAATATCAATCAA  
CCTCACCGTGCGCCACAACCTACCTTCATCGTCTAGTCCTGCTTACAATCCTTGAATTCGCAGT  
CGCACTCATTACAGGCCTACGTCTTACCCCTTCTAATCAGCCTCTACTTACATGATAACACATA  
ATGACCCACCAAACCCACTCATACCACATAGTAAACCCAAAGCCCTTGACCCCTAACCGGGGC  
CCTATCTGCCCTCCTAATAACATCGGGCCTAGCAATATGATTCCACTTCAACTCTACAACACT  
ACTCCTCCTAGGACTAACAACAAACCTCTTAACAATATATCAATGATGACGTGACATTGTAC  
GAGAAAGCACCTTTCAAGGCCACCACACACCCACAGTCCAAAAAGGACTACGATACGGCAT  
AATCCTGTTCAATTGTCTCAGAAGTATTTTTCTTCGCTGGCTTCTTCTGAGCATTCTACCACTCA  
AGCCTAGCACCTACCCCCGAACCTAGGAGGATGCTGACCCCCCACAGGCATCAACCCGCTAA  
ACCCACTGGAAGTACCTCTACTCAACACATCCGTTCTTTTAGCCTCAGGAGTATCAATTACAT  
GGGCACACCATAGCTTAATAGAAGGCAGCCGAAACCACATAATCCAGGCCCTGCTCATCAC  
AATTCTCCTAGGCATTTACTTCACACTACTGCAGGTCTCAGAATATTACGAAGCACCCCTTAC  
AATCTCCGACGGCGTGTACGGCTCTACCTTCTTTGTGGCAACTGGATTCCACGGCCTACACGT  
CATCATCGGCACCTCCTTCTAACTGTGTGCCTACTACGACAATAAAATACCACTTTACATC  
AAACCACCACTTCGGATTTCGAAGCTGCCGCCTGATACTGACACTTCGTAGATGTAGTGTGAC  
TGTTCTGTATGTCTCCATTTACTGATGAGGTTCTATTTTCTAAGTATGCACAGTACAGTTG  
ACTTCCAATCAACAAGCTCTGGCCACAACCCAGAAGAGAATAATAAACCTACTCCTAGCAAT



AACAACAAACACCATACTAGCATGCCTGCTCATACTAATCGCCTTCTGACTCCCTCAATTAA  
ACACGTA CT CGGAAAAGATCACCCCCTACGAATGCGGATTTCGACCCCATGGGATCGGCACG  
ACTACCATTCTCCATAAAATTCTTCCTAATCGCCATCACGTTCTACTATTTCGACCTAGAAAT  
CGCACTACTCCTGCCACTCCCCTGAGCATCACAAACAAACACCTAGGCACCATAATCACCG  
TAGCCTTGCTCCTCATCCTACTGCTAGCAATTAGCCTGGCCTACGAATGAACACAAAAAGGC  
CTAGAATGAACTGAGTATGGTAGCTAGTTTACACAAAAACAAATGATTTTCGACTCATTAACT  
ATGACTTACTCATAGCTACCAAATGTCCCTAATTTACATTAAACACAACACTGGCATTCACTAT  
CTCCCTAATGGGGATATTAATGTACCGATCACACCTAATGTCCTCACTACTATGTCTAGAGG  
GCATAATACTCTCCCTATTTCGTAATAATCACCATTACAATCCTAACTAACCCTTCACACTAG  
CCAACATAGCACCCCATCATCCTCCTCGTACTAGCAGCATGCGAGGCTGCCCTAGGCCTCTCT  
CTACTAGTACTTGTATCTAACACATACGGCACGGACTACGTACAAAACCTAAACCTGCTACA  
ATGCTAAACTAATTGTCCCCACAGCCATACTAATTTCCCTAACATGACTATCGAACAAAAA  
CATAGTGTGAATCAACGTAACATCACACAGCATGCTAATCAGCCTAACATCTCTAGGCATCT  
TGGGCCAGCATGACCACAACAACATAAGCCTCTCAGCCATCTTCTTCTCTGACCCCTATCA  
GCACCCTTAATCGTATTAACAACATGACTCCTCCCCCTAATACTAACAGCCAGCCAAGCCCA  
CCTCTCCAATGAGCCCTGGGCCTAAAAAACTATACATTACCATACTAATCACCCCTCCAAG  
CACTACTAATCATAACATTCGCCTCCTCTGAGTTCATTATATTCTACATCCTGTTTGAAGCAA  
CACTCGTACCAACCCTAATCATCATCACACGATGAGGAAACCAAGCAGAGCGACTAAACGC  
AGGGTCTACTTCTCTTCTACACAATAGTAGGATCACTCCCCCTTCTAGTAGTACTCACATA  
CACCCAAAACATAACAGGAACCCTAAACATACTAGTACTACAATACTGAGCGAAACCCATA  
AACGACTCTTGATCCAACATGCTAATATGACTAGCATGCATAATAGCATTTCATAGTAAAAAT  
ACCCCTATACGGACTACACCTCTGACTGCCAAAAGCCCACGTAGAGGCCCCCATTCGAGGCT  
CCATAGTACTTGCAGCCGTACTACTAAAACCTAGGCGGATACGGCATAATACGCATCACTATC  
ATGCTAGAACCAATAACAACATTCATAGCATACCCCTTCTTAATACTATCCCTGTGAGGAAT  
AATCATAACAAGCTCCATCTGCCTTCGCCAAACCGACCTAAAATCACTAATCGCCTACTCCT  
CCGTAAGCCACATAGCACTGGTAATCGTCGCAATCCTAATCCAAACCCCATGAAGCTACATG  
GGGGCCACCGCTCTCATAATCGCCCACGGTCTAACATCCTCCATACTATTTTGCCTAGCAAA  
CACAACTATGAGCGAACCACAGCCGAACCTATAATACTAGCACGAGGACTGCAAACCCCTC  
CTACCCCTAATAGCTGCCTGATGACTCCTAGCAAGCCTAACCAACCTGGCCCTCCCCCCCAG  
CATCAACCTAATCGGAGAACTATTTCGTAGTAGTATCAACATTCTCGTGGTCCAACACCACCA  
TCATCCTTACTGGAACAAACATTATCATCACAGCCACCTACTCCCTATACATACTAATATCCA  
CCCAACGTGGAAAATACACCCACCACATCAACAACATCTGCCCCTCCTTCACCCGAGAAAAAC  
GCTCTAATGGCACTCCACATACTGCCCCTACTAATGCTATCAACCAACCCCAAAATCATCCT  
AGGGTGCCTTTACTGTAAGTATAGTTTAATAAAACCTCAGATTGTGGATCTGACAATAGAAG  
ACCACAACCTTCTTACTTACCAAAAAAGCATGCAAGAACTGCTAATTCTGCCCCCATGTATA  
AAAACATGGCTTTTTTAACTTTTAGAGGATGACAGACACCCGTTGGTCTTAGGAACCAAAA  
GACTTGGTGCAACTCCAAGTAAAAGTAATTAACACCCTAACCTGCACCTCCCTTATAAACT  
AACAACACTAATCATACCAATCATAATCACCCCCACAAATGCCTACACAAGCAAAAACTAC  
CCCCACCACGTAAAAAACATAGTCGCACTAGCCTTCGCCGTCAGCATAATCCCAGCAATAGC  
ATTTATATACTCAAACGAAGAAATAACCATCTTCAACTGACACTGAACAACAATCCAAACAA  
TAAAAATAACAATAAGCTTCAAACCTAGACTATTTCTCCACAACATTCATACCAGTGGCCCTA  
TTCGTACATGGTCTATCATAGAATTCTCTCTATGATATATAAAATCAGACCCCCACATCAAC  
CGATTCTTCAAGTACCTACTAATCTTCCTAATCACAATAATAATCCTAGTATCCGCCAACAAAC  
ATATTCCAACCTCTTCATCGGCTGAGAAGGAGTAGGAATCATATCTTTCTCCTAATCGGCTG  
ATGGCACGGACGAACAGATGCAAACACAGCAGCCATACAGGCCATCCTATACAACCGCATC  
GGAGACATTGGACTAATCCTGTCAATGGCATGATTCCTCACAACCTAAACTCATGGGACCT  
CCAACAAATCCTCATGCTAAACCCCGAGAACACAAACATCCCCCTAGCGGGCCTACTACTAG  
CAGCAACTGGAAAATCCGCACAATTTGGGCTACACCCATGACTCCCCTCAGCCATAGAAGGC  
CCAACCCAGTATCAGCCCTACTCCACTCCAGCACAAATAGTAGTCGAGGGGTATTCCTACT  
AATCCGATTCCACCCCTAATAGAAAACAACAAAACAATCCAAACAACAACCTATGCCTA  
GGGGCCATTACAACCCTGTTACAGCCATCTGTGCTCTACCCAAAACGACATCAAAAAGAT

CGTGGCCTTCTCAACCTCAAGCCAAGTCTAATAATAGTCACCATCGGAATCAACCAAC  
CACACCTAGCCTTCATACACATCTGCACCCACGCCTTTTCAAAGCCATACTATTCATGTGCT  
CCGGATCGATCATCCACAGCCTAAACGACGAACAAGACATCCGCAAAATAGGAGGACTTTT  
CCACGCCCTCCCCACTACCACCTCCGCTCTCATTATTGGCAGCCTAGCCCTAACAGGAACCC  
CATTCCTAACAGGCTTCTACTCTAAAGACCTAATCATCGAAACCGCTAACATATCCCACACA  
AACGCCTGAGCCCTGCTCATCACACTAGTAGCCACCTCCCTCACAGCCGCCTACAGCACACG  
AATCATCTTCTTCACACTATTAGGACAACCCCGATCCAACACCCTAATCAACATCAACGAAA  
ACAACCCCTCACTAACAACCCAATCAAACGCCTAATGCTAGGGAGCATCTTCGCCGGATTCT  
CTACTATACAACAACATCCCCCAACAACCATGCCCAAAACAACCTATACCACAATACCTAAA  
ATACACCGCCCTCGCCACTACAATCCTAGGCCTAATCATAGCCCTAGAAGTGTGCAACCTGT  
CCCTAAACCTAAGCCACAAACCCCTCAAGTGCCTTCAAATTCTCAACCTTACTAGGCTAC  
TTCCCCACAATCATTCACCGCTCAGGACCCCTCTGATCACTAACAACAAGCCAAAAACTAGC  
ATCCCTTATTCTAGACCTAATCTGACTAGAAAATATCATACCAAAGTCAATCTCACACTTCCA  
CATAAAAGCCTCCCTAATAACATCCAACCAAAAAGGCTCAATCAAACCTATACTTCCTGTCT  
TCGCAGTGACAATAGTCCTCGCTCTCCTCATATTCTATTCCCCCGAGTAACCTCCATAACAAC  
AACAACACAAATAAACAAGACCACCCGGTCATAATCACAACCAAGCACCATGGCTATAA  
AGAGCAGCAACACCCGCAGCTTCCTCACTAAAAAACTAGACCCCCCAACATCATAAGTCG  
CCCAATCACCAGGACCACCAAGATCAAAAACCACACTCAACCCCTCACCTTCAACATATAA  
AGCACTAAAACCAACTCTATGACCACACCCAAAAACAAGCACCAGCACAACCACATTAG  
ACACCCAACTTCAGGATACTCCTCAATGGCTATGGCCGCCGTATAACCAAAAAACAACCAAC  
ATCCCCCAAGATAAATCAAAAAAACCATTAAACCCAAAAAAGACCCACCAAAATTAATA  
CAACCCCAACCTGCACCGCCAGCTACAACCAGACTAAACCCCCCATAAATAGGAGAAGG  
CTTTGAAGAAAACCTAAAAAACTAATCACAATAAACAACCTCAAAATAAACACAACATAT  
GTCATTGTTCCACATGGACTCAAACCATGACCTATGACACGAAAAATCATCGTTGTAATTA  
AACTACGGAACCTAATGACAAACATCCGAAAAACACACCCCTACTCAAAATCATCAACA  
ACTCCTTTATTGATCTCCCCACCCCTCTAACATCTCAGCATGATGAACTTCGGATCACTAC  
TAGGAATCTGCTTAGTCCTACAAATTCTCACAGGACTATTTCTAGCCATACACTACACAGCA  
GACACAGCAACCGCATTCTCATCAGTAACTCACATCTGCCGAGATGTAACTACGGATGAAT  
TATCCGATACATACGCTAACGGAGCTTCCCTGTTCTTCATCTGCCTATTTCGCACACATCGG  
ACGAGGCATCTACTACGGATCCTTTGCCTACAAAGAGACATGAAACATCGGTATCCTGCTCC  
TATTTGCAGTAATAGCAACAGCCTTTATGGGATACGTCCTACCATGAGGACAAATGTCCTTC  
TGAGGTGCTACGGTAATTACAAACCTTTTATCCGCAATACCCTACATCGGGTCTAGCCTAGT  
AGAGTGAGTCTGAGGGGGATTCTCGGTAGACAAAGCAACTCTCACTCGATTCTTCGCTCTTC  
ACTTCATCCTTCCCTTCGTAATTCTTGCCCTAGTACTAGTACACTTACTATTCTTACACGAAA  
CCGGATCCAACAACCAATAGGAATCGTATCCAACCCCGACGTAATCCCCTTCCACCCATAC  
TACACAGCCAAGGACACCCTTGGCCTATTCATCATGCTCACAGCACTAATATCCTTAGCCCT  
ATTCTTCCCCGACCTACTAGGAGACCCAGACAATTATACACCCGCAACCCCTAAACACAC  
CACCCACATCAAACCAGAATGGTACTTCTATTCGCATACGCAATCCTACGCTCAATTCCC  
AACAAATTGGGAGGAGTACTAGCACTAATCCTATCCATCCTCGTACTAGCACTAATCCCCT  
ACTACACACATCAAAACAACGAACATAATGTTCCGACCCCTGAGCCAAACCATCTTCTGAC  
TCCTGGTGGCCGACCTACTAGTTCTCATATGAATCGGAGGACAACCCGTGGAACACCCCTTC  
ATCCTAATCGGACAAGTAGCCTCTATCCTTTATTTACACTAATCCTAGCAGCAATGCCAATC  
GCAGGTATCATCGAAAACAATCTCATAAAATGAAGAGTCTTTGTAGTATATGTCAATACACT  
GGTCTTGTAACAGCAAAGGAATTAACCTCCCCAAGACTCAGGAAGAAGACAAAAGCCC  
TACCATCAGCACCCAAAGCTGAAATTCTCAATAAACTACTTCTGCAACAATTAAGTCCA  
ACAAGCTTTATATAGTATATGCCATGTATAATCGTGCATTAAATGGTTTGCCCATGCATATAA  
GCAGGTACATTATATTATTATAGTACATAGGACATATTATGTATAATCGTGCATTATTGATCT  
AGTACATACATATAAGCAGGTACATTATATTATTATAGTACATAGGACATATTATGTATAAT  
CGTGCATTATTGATCTAGTACATGCATATAAGCAGGTACATAATATCCTTAGAGTACATAGT  
ACATATTATTATTGATCGGACATAGCACATCAAGTCAAATCATTTCCAGTCAACATGCGTAT  
CCCTACCACTGAAGGCCGCCTAATCACCATGCCGCGTGAAATCATCAACCCGCTCATAGTCG

TGTCCTCTTCTCGCTCCGGGCCCATACGGACTGTGGGGTAGTTAAAGTGAACTATACCTG  
GCATCTGGTTCTTACTTCATGTTTCATCTTATATCTAGCCGCTCACTCGTTCCTCTTAAATAAGA  
CATCTCGATGGATTAATTACTAATCAGCCCATGCCTAACATAACTGTGCTGTCATGCCTTTGG  
TATCTTTTAATTTTCGGGGTGCGAGGTTCAACTGGGTCACCGACCTTCGAGCAGGTTGATAA  
CTTGTAGATAGACATTCATTGAATATTATTGGTCGTACATACTAACTCCTAGGTGTTATTCAG  
TCAATGGTTACAGGACATAGAGAATTTTACAACAAAATTTTGAGTTGAGCCTACAGAAATCA  
TAGATCACAATCGCAGACACCAACAAATACTAAAGTAATTAATTTAAATTTATAATTTTAGG  
TTTGATATATCAAACCCCCCTTACCCCCCAAAGCCTCCACGTACTAAACATCTTGTCAAAC  
CCCAAAGCAAGAATACACACGTACACAAAGGCGCTATAAGCACAAAGTATTACGTAAGTA  
TATAGATATACAAACTACTAGCGCAGCTTTCTGTCCACTAGTTAAATACTTAGGTGCTTGA  
ACATATATGGCTGGAAGGCCATGTAGTGACTACGTAATGATTCCTATTAGCCACAATAAAAA  
CAATATACAATAAATACAAATATAGATCAATTCTTATAGGCGCCGATAGCATAAACTATCTG  
CCCCCTATGTACAATTGAATTTAAA

>SRR7524043 (circular) REORGANIZED

GTTAATGTAGCTTAAACCAAAGCAAAGCATTGAAAATGCTTAGATGAGCCCACAACTCC  
ATAAACACACAGGTTTGGTCCCAGCCTTTTTATTAATTTTCAATAGGATTACACATGCAAGTA  
TCCGCCCCCAGTGAAAATGCCCTTCAAGTTATCACAGTACCTGAAGGAGCTGGCATCAAGC  
ACGCCAATAAACGCAGCTAACGACGCCTTGCAGAGCCACACCCCCACGGGAAACAGCAGTG  
ATAAAAATTAGGCTATAAACGAAAGTTCGACCTAGCCATATTGCATTGGGTTGGTAAATCTC  
GTGCCAGCCACCGCGGTCATACGATTAACCCTAGCTAATAAAAAACCGGCGTAAAGCGTGC  
TAAGATAAATCCAATCCAAATAAAGTTAAGCCCTGACCAGGCCGTAAAAAGCCGTGGTTAC  
CGTAAAAATAAACTACGAAAGTAACTTTAATTCACATCGACACACGATAGCTAAGACCCAA  
ACTGGGATTAGATACCCCACTATGCTTAGCCCTAAACCTAAATAATTCACCAGACAAAATTA  
TTCGCCAGAGAACTACTGGCAACAGCCTAAAACTCAAAGGACTTGGCGGTGCTTTACATCCC  
CCTAGAGGAGCCTGTTCTGTAATCGATAAACCCCGATAAACCCCTACCAATTCTAGCTAATAC  
AGCCTATATACCGCCATCTCCAGCAAACCCCTAAAAAGGAAGCACAGTAAGCAAGACTATGA  
AAACATAAATACGTTAGGTCAAGGTGTAGCCCATGAATTGGGAAGAAATGGGCTACATTTTC  
TAAAATAGAACACAAACGAACGCCCTAATGAAAACGAGGGCCAAAGGAGGATTTAGCAGT  
AAGCTGAGAATAGAAAGCTCAACTGAACCCGGCCCTAAAGCACGCACACACCGCCCCGTAC  
CCTCTTCAAATCCCCAAGAATACCTAAACATATTAGACAAACACCAAGGCATGAGAAGAGA  
CAAGTCGTAACAAGGTAAAGCATACTGGAAGGTGTGCTTGGATCACCAAAGTGTAGCTTAAA  
CAAAGCATCTGGCCTACACCCAGAAGATCTCAATAACATGACCACTTTGAACAAATCCTAGC  
CCAACCAACACCCAACATACAACCAAAACAGAGCACATAAACCAAAGCATTTACTAGACTAA  
AGTATAGGCGATAGAAATTACACAACGGCGCTATAGAAAAAGTACCGCAAGGGAAAGATG  
AAAGATGCATTCAAAGTACAAAAAAGCAAAGATTACCCCTTGTACCTTTTGCATAATGGACT  
AACTAGAAACACCCTAGCAAAGAGAACTTAAGCTAGAAACCCCGAAACCAGACGAGCTACC  
TACGAGCAGTTTAAAGAACCCACTCATCTATGTGGCAAAATAGTGAGAAGACTTGTAGGTA  
GAGGTGAAAAGCCTAACGAGCCTGGTGATAGCTGGTTGTCCAAGAAATGAATCTAAGTTCA  
ACTTGAAGCATACCCAAAAGCCCAAAAACCTATAATGTAGGCTTCAAGTATAGTCTAAAAAG  
GTACAGCTTTTTAGAAACAGAATTAAATCTTAATTAGTGAGTAAACAATACAACAACCATAG  
TTGGCCTAAAAGCAGCCATCAATTAAGAAAGCGTCAAAGCTCAACAATAAGACATAAATAA  
TACCACAAATAAAAAATCAACTCCTAAACCAATATTGGACCAATCTATCAATAAATAGAAGA  
AATACTGTTAGTATGAGTAACAAGAAATAGATCTCCTTGCACAAGCTTATATCAGAACGGAT  
GACCCACTGATAATTAACAACGAAACAAATCAAACCCAAAAATAGAAGTTTGTAAATAGA  
TTGTAAACCAACACAGGCGTGCATATTCTCAAAGGAAAGGTTAAACAAATGAAAGGAAC  
TCGGCAAACACAAGCCCCGCCTGTTTACCAAAAACATCACCTCTAGCATAACCAGTATTAGA  
GGCACTGCCTGCCAGTGACTCGCGTTAAACGGCCGCGGTATTCTGACCGTGCAAAGGTAGC  
ATAATCACTTGTTCTCTAAATAAGGACTAGTATGAACGGCTAGACGAGGGTTTTACTGTCTC  
TCATCTGTAACCAAGTGAAATTGACCTCCCCGTGAAGAGGCGGGAATAATATAATAAGACGA  
GAAGACCCTATGGAGCTTTAATTAAACAGCTTAAAATTAACCAACACCACTCTAACAGAGA  
TATAACAAACCAATTAGCCTAAGCTGTCAATTTTGGTTGGGGTGACCTCGGAGCAAAAAACA

ACCTACGAGCGGTCAAATCCAGACTAACAAGTCCAGATAATCCGTTAATTGATCCAACAAC  
TGATCAACGGAACAAGTTACCCTAGGGATAACAGCGCAATCCTATTCGAGAGTCCATATCGA  
CAATAGGGTTTACGACCTCGATGTTGGATCAGGACATCCCAATGGTGCAGAAGCTATTAATG  
GTTTCGTTTGTTC AACGATTAAAGTCCTACGTGATCTGAGTTCAGACCGGAGTAATCCAGGTC  
GGTTTCTATCTATTAATACACTTCTCCCAGTACGAAAGGACAAGAGAAGTAGGGCCTACCTC  
ACACAGGCGCCCTCGAATCAATAAATGACTACCCTCTTAATTTAGCCAATTCACAACAACCC  
CCAGTCCTAGAACCAGGGCCAGCTAGGGTAGCAAAGCACGGCAACTGCACAAGACTTAAGC  
TCTTGTAACAGAGGTTCAACTCCCCTCCCTAGCAGCAATGTACACAATCAACATAATAATAA  
TGATCATCCCCATCCTACTAGCCGTGGCATTCTTAACGCTAGTAGAACGCAAAGTGCTAGGA  
TACATGCAACTACGAAAGGGCCCAAACATCGTGGGCCCTTGAGGCCTGCTACAACCAATCG  
CCGACGCAGTAAAACTATTCACTAAAGAACCCCTACGACCCCTAACATCCTCAACCACAATA  
TTCATCATGGCACCTATCCTAGCACTGACACTCGCACTCACCATGTGAGTACCACTACCAAT  
GCCACACCCACTAGTCAACATAAACCTAGGAGTGCTATTCATACTGGCCATATCAAGCCTCG  
CCGTATACTCCATCTTATGATCAGGATGAGCCTCAAACCTCAAATACGCCCTCATTGGAGCA  
CTACGTGCAGTGGCCCAAACCATCTCATAACGAAGTGACACTAGCAATTATCCTGCTGTCCTT  
ACTGTTAATAAGCGGGTCCTTCACCCTCTCCACCCTAATCACAACCCCAAGAAAAGCTATGAC  
TACTAGTGCCCGCATGACCCCTGGCCATAATATGATTTCATCTCGACCCTAGCCGAGACAAAT  
CGAGCACCCCTTCGACCTAACAGAAGGAGAATCTGAACTCGTATCCGGCTTTAACGTTGAATA  
CGCAGCAGGCCCATTTCGCACTCTTCTTCCTTGCCGAATACGCAAACATCATCATAATAAACA  
TCTTGTCAGTGACGCTCTTCATAGGAGCCTTTCACGACCCCCACACCCCAAGCCTCTACACA  
GTTAATTTTGTAGTAAAAACACTCGCCCTTACCGCCCTATTTCCTATGAATCCGAGCATCCTAC  
CCACGATTCCGCTACGACCAACTAATGCACCTACTATGAAAAAATTTCCTACCACTAACCCCT  
AGCACTGTGCATGTGACACGTATCAATACCAATCGCCCTGTCAAGCATTCCCCCACAATCAT  
AAGAAATATGTCTGACAAAAGAATTACTTTGATAGAGTAAATAATAGAGGTTTAAATCCCCT  
TATTTCTAGAAAAACAGGCATTGAACCTGCACCTGAGAACTCAAAAATCTCCGTGCTACCAA  
CTTACACCACAATCTACAGTAAGGTCAGCTAAGCAAGCTATCGGGCCCATACCCCGAAAATG  
TTGGATCACAACCTTCCCGTACTAATAAACCTCACTATACTAGCCATCCTAACAAACCCTATT  
CTAGGGACCATGCTCGTCCTAATCAGCTCTCACTGACTAATGATTTGAATTGGATTTCGAGAT  
AAACATACTAGCAATAGTCCCTATCCTAATGAAAAAATTTCAGCCACGGGCCATAGAAGCA  
GCCACAAAATACTTCCTAATCCAAGCCACCGCGTCCATACTACTAATGCTAGCCATTACCCT  
AGACCTGATATCTTCTGGACAATGAACCATCACAAAAACACACAACACCCTACCATCAGCCA  
TCATCACCGTAGCTATGGCCATAAACTAGGAATAGCTCCATTCCACTTCTGAGTGCCAGAA  
GTAACACAAGGAAGCCCACTATCATCAGGCATGCTACTCCTAACCTGACAAAAAGTCGCAC  
CAATATCAATCCTATACCAATAATACCCACAATCAACACAAATATACTGACAACCATAGCC  
GCACTCTCAATCCTCATCGGCGGTTGAGGAGGGCTAAACCAGACCCCACTACGAAAAATCA  
TAGCATACTCCTCAATCGCCACATAGGCTGAATAGCAATAATCATAACATAACAACCCGGAC  
ATTGCCATTCTAAACCTACTAGTCTACATCATAATGACACTATCTATATTCGCAATCCTACTA  
TACAACCTCATCAACAACAACCCTATCACTATCCCACCTATCAAACAAGACACCACTAATCAC  
AGCCCTCGCACTACTAATCCTACTATCACTAGGAGGCCTCCCCCACTGACCGGATTTCATGC  
CCAAATGAATAATCATCCAAGAACTAACCAAAAACAACATAGTAATAATACCAACCGTGAT  
AGCAATAACAGCACTACTCAACCTATACTTCTACGTACGCCTGGCGTACTCCACAGCACTAA  
CCATACTCCCAACCACCAACAACATAAAAAATAAAGTGACAATTTCGAAACAACAAAAATCAT  
AAAATAACCCACCTCTAATCATTTTATCCACAATAGCACTCCCACTCACCCCTATAATATC  
AATCCTAAACTAGGGACTTAGGCTACACAGACCGAGAGCCTTCAAAGCTCTAAGCAAATAC  
AACTATTTAGTCCCTGATATAAAGACTGTAGAAATTCAACCTACATCACCTAAACGCAAAT  
CAGGCGCTTTAATTAAGCTAAATCCTCACTAGATTGGTGGGATACAAACCCACGAAACTTTA  
GTTAACAGCTAAACACCCTAATCAACTGGCTTCAATCTACTTCTCCCGCCATAAAGAAGAAA  
GTGGCGGGGAGAAGTCCGGGCAGAATTGAAGCTGCTTCTTTGAATTTGCAATTCAATGTGTAA  
ACACCTCAGGACCTGGCAAGAAGAGGACTCCAACCTCTGTGTTTCAGATTTACAGTCTAATGC  
TTACTCGGCCATCTTACCTATGTTACCAACCGCTGGCTCTTTTCAACAAATCACAAAGACAT  
TGGCACACTATATCTCTTATTTGGCGCCTGGGCCGGAATAGTAGGCACCGCACTAAGTCTTC

TAATTCGCGCTGAGCTAGGTCAGCCTGGGACCCTCTTAGGGGACGACCAAATTTACAATGTG  
ATCGTTACCGCACATGCATTTGTAATAATCTTCTTCATAGTCATGCCAATCATAATCGGGGGC  
TTTGGAAACTGACTAGTACCCCTGATAATTGGAGCCCCTGACATGGCATTCCCCCGTATAAA  
CAACATAAGTTTCTGACTGCTCCCCCCTCTTTCCTACTTCTTCTGGCCTCTTCCATAGTCGAA  
GCGGGGGCTGGAACCGGCTGAACTGTATACCCCCCTTTAGCAGGAAATTTAGCACACGCAG  
GAGCATCTGTAGACCTAACCATCTTCTCTCTTCATCTAGCGGGTGTCTCATCAATCCTTGGGG  
CTATCAATTTTATTACAACAATCATCAACATAAAACCCCCTGCAATAAACCAATACCAAACC  
CCACTATTCGTGTGATCAGTCCTAATTACGGCCGTGCTTCTGCTACTATCTCTACCCGTACTA  
GCTGCTGGCATTACCATACTGTAAACCGACCGTAATCTAAATACAACCTTTTTTGACCCCGCA  
GGAGGAGGTGACCCCATCTATACCAACACCTATTCTGATTCTTCGGACACCCCGAAGTGTA  
CATTCTCATCCTTCCCTGGATTGGAATAATCTCCACATCGTAACCTATTACTCCGGGAAAAA  
AGAGCCCTTTGGATACATGGGCATAGTCTGAGCAATAATATCCATTGGCTTCTGGGCTTCA  
TTGTATGGGCACACCACATGTTACAGTGGGAATAGACGTTGATACACGGGCCTACTTCACA  
TCAGCCACCATAATTATTGCTATCCCCACTGGAGTAAAGGTGTTTAGTTGACTAGCAACCCT  
GCACGGAGGAAACGTAAAATGGGCCCCAGCTATACTATGGGCCCCTGGGCTTTATCTTCCTGT  
TTACAGTCGGGGGTCTAACTGGCATCGTGCTGGCCAACTCGTCCCTAGATATCGTCCTCCAT  
GATACCTACTACGTAGTAGCCCACTTCCACTACGTTCTCTCCATGGGAGCAGTTTTCGCCATC  
ATAGGAGGCTTCGTCCATTGATTCCCCCTGTTCTCAGGATACACGCTCAACAACACATGGGC  
AAAAGTTCACTTTACAATCATATTCGTGGGCGTAAACATGACCTTTTTCCCCCAACACTTCCT  
TGGGCTGTCTGGAATACCTCGACGATACTCGGACTACCCAGACGCTTACACAATGTGAAACA  
CTGTGTCTCCATAGGATCCTTCATCTCATTAAACCGCCGTAATACTCATGGCCTTCATAATCT  
GAGAGGCATTCGCCTCTAAACGGGAAGTCCTAATAGTGGAGTCCACAAATACCAACCTCGA  
ATGACTACACGGCTGCCACCACCCTACCACACATTCGAAGAACCTGCTTTCGTAAATCTGG  
TCAAAACAAGAGAGGAAGGAATCGAACCCTCAAACAATGGTTTCAAGCCAATATCATAGCC  
CCTATGTCTCTCTCAATCACAGAAGTATTAGTAAAATTTACATAACTTTGTCAAAGTTAAATT  
ATAGGTTCAAGCCCTTTATACTTCCATGGCGTACCCGCTCCAATTAGGCTTTCAAGATGCCAC  
GTCCCCAATCATAGAAGAATTACTCCACTTCCACGATCACACACTAATAATCGTGTTCTTGAT  
CAGCTCCCTAGTACTATACATTATCTCTCTCATACTAACAACCAAACCTCACCCACACAAGTA  
CAATAGACGCTCAAGAAGTAGAAACCATTTGAACCATCCTCCCCGCAGTTATCCTAATCCTA  
ATCGCCCTGCCCTCCCTACGCATCCTCTACATAATGGACGAGATTAACAACCCCGCCCTGAC  
AGTAAAAACAATGGGCCATCAATGATACTGAAGCTACGAATACACAGACTACGAAGACCTA  
AGCTTCGACTCATACATAATCCCAACTCAAGACCTAAAACCCGGCGAAGTCCGACTTCTAGA  
AGTGGACAACCGACTTGTACTACCCATAGACACAACCATCCGCATGCTCATCTCATCTGAAG  
ACGTCCTGCACTCTTGAGCCGTCCCATCCCTGGGCCTAAAAACAGATGCTATCCCGGGGCGT  
CTAAACCAAACAACCTGATATCAACCCGGCCCGGCCTATTCTACGGACAGTGCTCAGAAAT  
CTGTGGCTCAAATCACAGCTTCATGCCAATTGTCCTCGAAGTAGTACCCCTAAAAACATTTG  
AAAAGTGAAGTACGTCCCTACTGTAATTCATTGAGAAGCTAATAGCGCTAGCCTTTTAAAGTT  
AGAGATTGAGAGCACGCCTCTCCTCAATGACATGCCTCAACTAGACACTACAACATGATCCA  
TTACAATTATATCCATGATCCTGACCCTCTTTGTCTATTCCAATTAATAATCTCTAAACACT  
ACTACCCACACGACGCAGAGACCTCAACAAAAACACACCACAAAACACTCACCCCTGAGA  
AAAAAAATGAACGAAAATCTATTCACCTCTTTCATTACCCAGTGATAATAGGGATCCCTAT  
TGTAACAATTATCATTATGTTCCCAGTAATCCTCTTCCCAACATCAAACCGACTAATCAACAA  
CCGCATTGTATCCATACAACAATGGCTCCTAAAACAAACATCCAAACAAATAATAAGCATCC  
ACAACTACAAAGGACAGACCTGAACCCTGATATTAATAACACTAATCATTTTCATCGCATCT  
ACTAACCTACTAGGCCTGCTACCCCACTCATTACCCCCACAGCCCACTGTCAATAAACCT  
GAGCATAGCCGTTCTCTATGGGCAGCCACCGTAGTCACAGGTTTTTCGACACAATACAAAAA  
CATCTTTAGCCCACTTCTACCCCAAGGGAACACCAACCCCCCTTATCCAGTGCTAGTGATCA  
TTGAAACAATCAGCCTGCTAATCCAACCCATAGCGCTCGCAGTACGACTGACAGCCAACATC  
ACCGCCGGCCACCTGTTAATACACCTAATCGGAAGCGCAACCCCTTGCCCTAATATCAATCAA  
CCTCACCGTGGCCACAACCTACCTTCATCGTCCTAGTCCTGCTTACAATCCTTGAATTCGCAGT  
CGCACTCATTAGGCCTACGTCTTACCCTTCTAATCAGCCTCTACTTACATGATAACACATA

ATGACCCACCAAACCCACTCATACCACATAGTAAACCCAAGCCCTTGACCCCTAACCGGGGC  
CCTATCTGCCCTCCTAATAACATCGGGCCTAGCAATATGATTCCACTTCAACTCTACAACACT  
ACTCCTCCTAGGACTAACAACAAACCTCTTAACAATATATCAATGATGACGTGACATTGTAC  
GAGAAAGCACCTTTCAAGGCCACCACACACCCACAGTCCAAAAAGGACTACGATACGGCAT  
AATCCTGTTTATTGTCTCAGAAGTATTTTTCTTCGCTGGCTTCTTCTGAGCATTCTACCACTCA  
AGCCTAGCACCTACCCCCGAACCTAGGAGGATGCTGACCCCCCACAGGCATCAACCCGCTAA  
ACCCACTGGAAGTACCTCTACTCAACACATCCGTTCTTTTAGCCTCAGGAGTATCAATTACAT  
GGGCACACCATAGCTTAATAGAAGGCAGCCGAAACCACATAATCCAGGCCCTGCTCATCAC  
AATCCTCCTAGGCATTTACTTCACACTACTGCAGGTCTCAGAATATTACGAAGCACCCCTTAC  
AATCTCCGACGGCGTGTACGGCTCTACCTTCTTTGTGGCAACTGGATTCCACGGCCTACACGT  
CATCATCGGCACCTCCTTCTAAGTGTGTGCCTACTACGACAATAAAATACCACTTTACATC  
AAACCACCACTTAGGATTCTGAAGCTGCCGCCTGATACTGACACTTCGTAGATGTAGTGTGAC  
TGTTCTGTATGTCTCCATTTACTGATGAGGTTCTTATTTTCTAAGTATGCACAGTACAGTTG  
ACTTCCAATCAACAAGCTCTGGCCACAACCCAGAAGAGAATAATAAACCTACTCCTAGCAAT  
AACAACAAACACCATACTAGCATGCCTGCTCATACTAATCGCCTTCTGACTCCCTCAATTAA  
ACACGTACTCGGAAAAGATCACCCCTACGAATGCGGATTTCGACCCCATGGGATCGGCACG  
ACTACCATTCTCCATAAAATTCTTCTAATCGCCATCACATTCTACTATTTCGACCTAGAAAT  
CGCACTACTCCTGCCACTCCCCTGAGCATCACAAACAAACAAACCTAGGCACCATAATCACCG  
TAGCCTTGCTCCTCATCCTACTGCTAGCAATTAGCCTGGCCTACGAATGAACACAAAAAGGC  
CTAGAATGAACTGAGTATGGTAGCTAGTTTACACAAAAACAAATGATTTTCGACTCATTAACCT  
ATGACTTACTCATAGCTACCAAATGTCCCTAATTTACATTAAACACAACACTGGCATTCACTAT  
CTCCCTAATGGGGATATTAATGTACCGATCACACCTAATGTCCTCACTACTATGTCTAGAGG  
GCATAATACTCTCCCTATTCTGAATAATCACCATTAACAATCCTAATAACCACTTCACACTAG  
CCAACATAGCACCCATCATCCTCCTCGTACTAGCAGCATGCGAGGCTGCCCTAGGCCTCTCT  
CTACTAGTACTTGTATCTAACACATACGGCACGGACTACGTACAAAACCTAAACCTGCTACA  
ATGCTAAAATAATTGTCCCCACAGCCATACTAATTCCCCTAACATGACTATCGAACAAAAA  
CATAGTGTGAATCAACGTAACATCACACAGCATGCTAATCAGCCTAACATCTCTAGGCATCT  
TGGGCCAGCATGACCACAACAACATAAGCCTCTCAGCCATCTTCTTCTCTGACCCCTATCA  
GCACCCTTAATCGTATTAACAACATGACTCCTCCCCCTAATACTAACAGCCAGCCAAGCCCA  
CCTCTCCAATGAGCCCCCTGGGCCTAAAAAACTATACATTACCATACTAATCACCCCTCCAAG  
CACTACTAATCATAACATTTCGCCTCCTCTGAGTTCATTATATTCTACATCCTGTTTGAAGCAA  
CACTCGTACCAACCCTAATCATCATCACACGATGAGGAAACCAAGCAGAGCGACTAAACGC  
AGGGTCTACTTCTCTTCTACACAATAGTAGGGTCACTCCCCCTTCTAGTAGTACTCACATA  
CACCCAAAACATAACAGGAACCTAAACATACTAGTACTACAATACTGAGCGAAACCCATA  
AACGACTCTTGATCCAACATGCTAATATGACTAGCATGCATAATAGCATTTCATAGTAAAAAT  
ACCCCTATACGGACTACACCTCTGACTGCCAAAAGCCACGTAGAGGCCCCCATTCGAGGCT  
CCATAGTACTTGCAGCCGTACTACTAAAACCTAGGCGGATACGGCATAATACGCATCACTATC  
ATGCTAGAACCAATAACAACATTCATAGCATACCCCTTCTAATACTATCCCTGTGAGGAAT  
AATCATAACAAGCTCCATCTGCCTTCGCCAAACCGACCTAAAATCACTAATCGCCTACTCCT  
CCGTAAGCCACATAGCACTAGTAATCGTCGCAATCCTAATCCAAACCCCATGAAGCTACATG  
GGGGCCACCGCTCTCATAATCGCCCACGGTCTAACATCCTCCATACTATTTTGCCTAGCAAA  
CACAACTATGAGCGAACCCACAGCCGAACCTATAATACTAGCACGAGGACTGCAAACCCCTC  
CTACCCCTAATAGCTGCCTGATGACTCCTAGCAAGCCTAACCAACCTGGCCCTCCCCCCCAG  
CATCAACCTAATCGGAGAACTATTTCGTAGTAGTATCAACATTCTCGTGGTCCAACACCACCA  
TCATCCTTACTGGAACAAACATTATCATCACAGCCACCTACTCCCTATACATACTAATATCCA  
CCCAACGTGGAAAATACACCCACCACATCAACAACATCTGCCCCTCCTTCACCCGAGAAAAAC  
GCTCTAATGGCACTCCACATACTGCCCCTACTAATGCTATCAACCAACCCCAAAATCATCCT  
AGGGTGCCTTTACTGTAAGTATAGTTTAATAAAAACCTCAGACTGTGGATCTGACAATAGAAG  
ACCACAACCTTCTTACTTACCAAAAAAGCATGCAAGAACTGCTAATTCTGCCCCCATGTATA  
AAAACATGGCTTTTTTAACTTTTAGAGGATGACAGACACCCGTTGGTCTTAGGAACCAAAA  
GACTTGGTGCAACTCCAAGTAAAAGTAATTAACACCCTAACCTGCACCTCCCTTATAACACT

AACAACACTAATCATACCAATCATAATCACCCCCACAAATGCCTACACAAGCAAAAACACTAC  
CCCCACCACGTAAAAAACATAGTCGCACTAGCCTTCGCCGTCAGCATAATCCCAGCAATAGC  
ATTTATATACTCAAACGAAGAAATAACCATCTTCAACTGACACTGAACAACAATCCAAACAA  
TAAAAATAACAATAAGCTTCAAACCTAGACTATTTCTCCACAACATTCATACCAGTGGCCCTA  
TTCGTCACATGGTCTATCATAGAATTCTCTCTATGATATATAAAATCAGACCCCCACATCAAC  
CGATTCTTCAAGTACCTACTAATCTTCCTAATCACAATAATAATCCTAGTATCCGCCAACAAC  
ATATTCCAACCTCTTCATCGGCTGAGAAGGAGTAGGAATCATATCTTTCTCCTAATCGGCTG  
ATGGCACGGACGAACAGATGCAAACACAGCAGCCATACAGGCCATCCTATACAACCGCATC  
GGAGACATTGGACTAATCCTGTCAATGGCATGATTCCTCACAAACCTAAACTCATGGGACCT  
CCAACAAATCCTCATGCTAAACCCCGAGAACACAAACATCCCCCTAGCGGGCCTACTACTAG  
CAGCAACTGGAAAATCCGCACAATTTGGGCTACACCCATGACTCCCCTCAGCCATAGAAGGC  
CCAACCCAGTATCAGCCCTACTCCACTCCAGCACAATAGTAGTCGCAGGGGTATTCCTACT  
AATCCGATTCCACCCCTAATAGAAAACAACAAAACAATCCAAACAACAACCCCTATGCCTA  
GGGGCCATTACAACCCGTGTTACAGCCATCTGTGCTCTCACCCAAAACGACATCAAAAAGAT  
CGTGGCCTTCTCAACCTCAAGCCAAGTCTAATAATAGTCACCATCGGAATCAACCAAC  
CACACCTAGCCTTCATACACATCTGCACCCACGCCTTTTTTCAAAGCCATACTATTCATGTGCT  
CCGGATCGATCATCCACAGCCTAAACGACGAACAAGACATCCGCAAAATAGGAGGACTTTT  
CCACGCCCTCCCCACTACCACCTCCGCTCTCATTATTGGCAGCCTAGCCCTAACAGGAACCC  
CATTCCTAACAGGCTTCTACTCTAAAGACCTAATCATCGAAACCGCTAACATATCCCACACA  
AACGCCTGAGCCCTGCTCATCAGCTAGTAGCCACCTCCCTCACAGCCGCCTACAGCACACG  
AATCATCTTCTTCACACTATTAGGACAACCCCGATCCAACACCCTAATCAACATCAACGAAA  
ACAACCCCTCACTAACAAACCCAATCAAACGCCTAATGCTAGGGAGCATCTTCGCCGGATTTC  
CTACTATACAACAACATCCCCCAACAACCATGCCCAACAACCTATAACCACAATACCTAAA  
ATACACCGCCCTCGCCACTACAATCCTAGGCCTAATCATAGCCCTAGAAGTGTGCAACCTGT  
CCCTAAACCTAAGCCACAACCCCCCTCAAGTGCCTTCAAATTCTCAACCTTACTAGGCTAC  
TTCCCCACAATCATTCACCGCTCAGGACCCCTCTGATCACTAACAACAAGCCAAAAACTAGC  
ATCCCTTATTCTAGACCTAATCTGACTAGAAAATATTATACCAAAGTCAATCTCACACTTCCA  
CATAAAAGCCTCCCTAATAACATCCAACCAAAAAGGCTCAATCAAACCTATACTTCCTGTCT  
TCGCAGTAACAATAATCCTCGCTCTCCTCATATTCTATTCCCCCGAGTAACCTCCATAACAAC  
AACAACACAAATAAAACAAAGACCACCCGGTCATAATCACAAACCAAGCACCATGGCTATAA  
AGAGCAGCAACACCCGCAGCTTCCTCACTAAAAAACTAGACCCCCCAACATCATAAGTCG  
CCCAATCACCAGGACCACCAAGATCAAAAACCACACTCAACCCCTCACCTTCAACATATAA  
AGCACTAAAACCAACTCTATGACCACACCCAAAACAAAAGCACCGAGCACAACCACTTAG  
ACACCCAAACTTCAGGATACTCCTCAATGGCTATGGCCGCCGTATAACCAAAAACAACCAAC  
ATCCCCCAAGATAAATCAAAAAAACCATTAAACCCAAAAAAGACCCACCAAAATTAATA  
CAACCCCAACCTGCACCGCCAGCTACAACCAGACTAAACCCCCCATAAATAGGAGAAGG  
CTTTGAAGAAAACCTAAAAAACTAATCACAAAAATAACACTCAAAATAAACACAACATAT  
GTCATTGTTCCACATGGACTCAAACCATGACCTATGACACGAAAAATCATCGTTGTAATTA  
AACTACGGAAACCTAATGACAAACATCCGAAAAACACACCCCTACTCAAAATCATCAACA  
ACTCCTTTATTGATCTCCCCACCCCTCTAACATCTCAGCATGATGAAACTTCGGATCACTAC  
TAGGAATCTGCTTAGTCCTACAAATTCTCACAGGACTATTTCTAGCCATACACTACACAGCA  
GACACAGCAACCGCATTCTCATCAGTAACTCACATCTGCCGAGATGTAAACTACGGATGAAT  
TATCCGATACATACAGCTAACGGAGCTTCCCTGTTCTTCATCTGCCTATTTCGCACACATCGG  
ACGAGGCATCTACTACGGATCCTTTGCCTACAAAGAGACATGAAACATCGGTATCCTGCTCC  
TATTTGCAGTAATAGCAACAGCCTTTATGGGATACGTCCTACCATGAGGACAAATGTCCTTC  
TGAGGTGCTACGGTAATTACAAACCTTTTATCCGCAATACCCTACATCGGGTCTAGCCTAGT  
AGAGTGAGTCTGAGGGGGATTCTCGGTAGACAAAGCAACTCTCACTCGATTCTTCGCTCTTC  
ACTTCATCCTTCCCTTCGTAATTCTTGCCCTAGTACTAGTACACTTACTATTCTTACACGAAA  
CCGGATCCAACAACCCAATAGGAATCGTATCCAACCCCGACGTAATCCCCTTCCACCCATAC  
TACACAGCCAAGGACACCCTTGGCCTATTCATCATGCTCACAGCACTAATATCCTTAGCCCT  
ATTCTTCCCCGACCTACTAGGAGACCCAGACAATTATACACCCGCAAACCCCTAAACACAC

CACCCACATCAAACCAGAATGGTACTTCCTATTTCGCATACGCAATCCTACGCTCAATTCCC  
AACAAATTGGGAGGAGTACTAGCACTAATCCTATCCATCCTCGTACTAGCACTAATCCCCT  
ACTACACACATCAAACAACGAACATAATGTTCCGACCCCTGAGCCAAACCATCTTCTGAC  
TCCTGGTGGCCGACCTACTAGTTCTCACATGAATCGGAGGACAGCCCGTGGAACACCCCTTC  
ATCCTAATCGGACAAGTGGCCTCTATCCTTTATTTACACTAATCCTAGCAGCAATGCCAATC  
GCAGGTATCATCGAAAACAATCTCATAAAATGAAGAGTCTTTGTAGTATATGTCAATACACT  
GGTCTTGTAACCAGCAAAGGAATTAACCCCTCCCCAAGACTCAGGAAGAAGACAAAAGCCC  
TACCATCAGCACCCAAAGCTGAAATTCTCAATAAACTACTTCCTGCAAACAATTAAGTCCA  
ACAAGCTTTATATAGTATATGCCATGTATAATCGTGCATTAAATGGTTTGCCCCATGCATATAA  
GCAGGTACATTATATTATTATAGTACATAGGACATATTATGTATAATCGTGCATTATTGATCT  
AGTACATACATATAAGCAGGTACATTATATTATTATAGTACATAGGACATATTATGTATAAT  
CGTGCATTATTGATCTAGTACATGCATATAAGCAGGTACATAATATCCTTAGAGTACATAGT  
ACATATTATTATTGATCGGACATAGCACATCAAGTCAAATCATTTCCAGTCAACATGCGTAT  
CCCTACCACTGAAGGCCGCTAATCACCATGCCGCGTGAAATCATCAACCCGCTCATAGTCG  
TGTCCCTCTTCTCGCTCCGGGCCCATAACGGACTGTGGGGTAGTTAAAGTGAACTATACCTG  
GCATCTGGTTCTTACTTCATGTTTCATCTTATATCTAGCCGCTCACTCGTTTCTTAAATAAGA  
CATCTCGATGGATTAATTACTAATCAGCCCATGCCTAACATAACTGTGCTGTCATGCCTTTGG  
TATCTTTTAATTTTCGGGGTGCGAGGTTCAACTGGGTCACCGACCTTCGAGCAGGTTGATAA  
CTTGTAGATAGACATTCATTGAATATTATTGGTCGTACATACTAACTCCTAGGTGTTATTCAG  
TCAATGGTTACAGGACATAGAGAATTTTACAACAAAATTTTGAGTTGAGCCTACAGAAATCA  
TAGATCACAATCGCAGACACCAACAAATACTAAAGTAATTAATTTAAATTTATAATTTTAGG  
TTTGATATATCAAACCCCCCTTACCCCCCAAAGCCTCCACGTACTAAACATCTTGTCAAAC  
CCCAAAGCAAGAATACACACGTACACAAAGGCGCTATAAGCACAAAGTATTACGTAAGTA  
TATAGATATACAAACTACTAGCGCAGCTTTCTGTCCACTAGTTAAATACTTAGGTGCTTGA  
ACATATATGGCTGGAAGGCCATGTAGTGACTACGTAATGATTCCTATTAGCCACAATAAAAA  
CAATATACAATAAATACAAATATAGATCAATTCTTATAGGCGCCGATAGCATAACTATCTG  
CCCCCTATGTACAATTGAATTAAA

>SRR6109207 (circular) ReOrganized

ATACTATAAATCCACCTCTCATTTTATTTCACTTCATACATGCTATTACACACTCTGTGCCATC  
ATAGTATGTTTTCATACATCCTCCCTTCTTTCACACCCTATGTATATCGTACATTAATGGTGTA  
CCCCCCTCCCCCTATGTATATCGTGCATTAAATGGCGTGCCCCATGCATATAAGCATGTACAT  
ACTGTGCTTGCTTTACATGAGGATACTCATTACAAGAACTTATTTCAAGCGATAGTCTATG  
AGCATGTATTTCACTTAGTCCAAGAGCTTGATCACCAGCCTCGAGAAACCAGCAATCCTTG  
CGAGTACGTGTACCTCTTCTCGCTCCGGGCCCATAATTTGTGGGGGTTTCTATACTGAAACTA  
TACCTGGCATCTGGTTCTTACCTCAGGGCCATGTTAGCGTCAACTCAATCCTACTAACCCCTTC  
AAATGGGACATCTCGATGGACTAATGACTAATCAGCCCATGATCACACATAACTGTGGTGTC  
ATGCATTTGGTATTTTTTAATTTTAGGGGGGGAACCTTGCTATGACTCAGCTATGACCGTAAAG  
GTCTCGTCGCAGTCAAATCAGCTGTAGCTGGGCTTATTCATCTTTCGAGGCTCCTCATGGACA  
CCCATAAGGTGCAATTCAGTCAATGGTCACAGGACATAACACTATAGATCACCCGGACTGGC  
GTTACGTGTACGTACGTGTACGTACGTGTACGCACGTGTACGTACGTGTACGCACGTGTACG  
TACGTGTACGTACGTGTACGCACGTGTACGCACGTGTACGCACGTGTACGCACGTGTACGCA  
CGTGTACGTACGTGTACGCGTACGTATTTTAGATACTAAGTTAGCTTAGACAAACCCCCCTT  
ACCCCCCGTAACTTCAAGAAGCTTACATATACTTATGGATGTCCTGCCAAACCCCAAAAACA  
AGACTAAATATATGCGCAAACATGAAGTCACTTACACCTAAACCCATATAATTAAGCTAACC  
CCCCAGCCAATGTTGCAACAACTACGGACATGGGACTCTAAATTTTAATTTATCTATAGATA  
TTTTTCTTTTACTGTGTCTCCCCAGCATTGATTTTTTAATTATCATTATTCCACACCACCAATT  
TCCATTGAGCTATTTACATGAGTTCCAAATCAATTATGTTTCATGTAGCTTAACGAATAAAGC  
AAGGTACTGAAAATGCCTAGATGGGTACGCTACCCCATAGACATAAAGGTTTGGTCCTAGC  
CTTCCTATTAGCCATTAACAAGATTACACATGTAAGTCTCCACGCTCCAGTGAAAATGCCCC



TTAAGTCCTCTTAGACGACCTAAAGGAGCGGGTATCAAGCACACCTTATGGTAGCTCACAAC  
GCCTTGCTTAGCCACACCCCCACGGGAAACAGCAGTGATAAAAATTAAGCTATGAACGAAA  
GTTGACTAAGCTATGTTAATACTAGGGTTGGTAAATCTCGTGCCAGCCACCGCGGTCATAC  
GATTAACCTCGAGTTAATAGGCCTACGGCGTAAAGCGTGTAAGAGAAAAAATCTCCTCTACTA  
AAGTTAAAGTATGATTAAGCTGTAAAAAGCTACCATTAATACTAAAATAAACTACGAAAGT  
GACTTTAAAATTTCTGATTACACGATAGCTAGGGCCCAAACCTGGGATTAGATACCCCACTAT  
GCCTAGCTCTAAACATAGATATTTTACTAAACAAAACCTATTCGCCAGAGAACTACTAGCAAC  
AGCTTAAAACTCAAAGGACTTGGCGGTGCTTTATATCCCCCTAGAGGAGCCTGTTCTGTAAT  
CGATAAACCCCGATAGACCTCACCATCCCTTGCTAATTCAGTTTATATACCGCCATCTTCAGC  
AAACCCTTAAAGGAAAAAAAGTAAGCATAACTACCCTACATAAAAAAGTTAGGTCAAGGT  
GTAACCTATGGGCTGGGAAGAAATGGGCTACATTTTCTATTCAAGAACAACCTTCTACGAAAA  
CTTTTATGAACTAAAAGCTAAAGGCGGATTTAGTAGTAAATTAAGAATAGAGAGCTTAATT  
GAACAGGGCAATGAAGCACGCACACACCGCCCGTCACCCTCCTCGAGTGATATAATTTAATT  
ATAACCTATTTAACTAAGCAAAGCATAAGAGGAGACAAGTCGTAACAAGGTAAGCATACT  
GGAAAGTGTGCTTGGATGAGCCAAAGTGTAGCTTAAACAAAGCGTCTGGCTTACATCCAGA  
AGATTTTATTAATATATGACTACTTTGAACCCAAAGCTAGCCCAAGCAACAATGACTAGTAA  
AACCATTATGAAACATTCAAACAAAACATTTAGTAGCATGACTAGAGTATAGGAGATAGAA  
ATTTTTAACTGGAGCTATAGAGAGAGTACCGCAAGGGAATGATGAAAGATTACCTAAAGTG  
ATAAACAGCAAAGATTGCCCCCTTCTACCTTTTGTATAATGAGTTAGCTAGAAATAACTTAAC  
AAAGAGAACTTAAGCTAAGTCCCCCGAAACCAGACGAGCTACCTATGAACAATCCACTGGG  
ATGAACTCATCTATGTTGCAAAATAGTGAGAAGATCCATAGGTAGAGGTGAAAGGCCTAAC  
GAGCCTGGTGATAGCTGGTTGCCGAGAATAGAATTTTAGTTCGACTTTAAACCTGCCTACAA  
AACTAATAATTCTAATGCAGATTTAAAATATATTCTAAAAAGGTACAGCTTTTTAGAGTTAA  
GGATACAGCCTTACTTAGAGAGTAAATATTTATATAAGCCATAGTAGGCCTAGAGGCAGCCA  
TCAATTAAGAAAGCGTTAAAGCTCAACATCTCTATTAACCTAATACCAAGAATATTTAATCA  
ACTCCTAATGTATTACTGGGTCAATCTATTTAAATATAGAAGTGATAATGCTAATATGAGTA  
ACAAGAAATATTTCTCCCATGCATAAGCTTATAACAGCAACGGATAACCACTGATAGTTAAC  
AACACATAGAAATAACCTAATGATAAAACACCTATTAAATCAATTGTTAGTCCAACACAG  
GCATGCAATCAGGGAAAGATTAAAAGAAGTGAAAGGAACTCGGCAAATACAAACCCCGCCT  
GTTTACCAAAAACATCACCTCCAGCATTTCCAGTATTGGAGGCACTGCCTGCCCGGTGACAT  
CAGTTAAACGGCCGCGGTATTCTGACCGTGCAAAGGTAGCATAATCATTTGTTCTCTAAATA  
AGGACTTGTATGAATGGCCACACGAGGGTTTAACTGTCTCTTACTTCCAATCAGTGAAATTG  
ACCTCCCCGTGAAGAGGCGGGGATAAGACAATAAGACGAGAAGACCCTATGGAGCTTTAAT  
TAACTAATTCAAAAAGAACTACTAACGACCCAACAGGAATAATATATCTCTTTTATGAATT  
AGCAATTTAGGTTGGGGCGACCTCGGAGGACAAAATAGCCTCCGAGTGATTATAAATCTAG  
ACTTACCAGTCAAAATGCTTAATCACTTATTGATCCAAAAATTCTTTTGATCAACGGAACAA  
GTTACCCTAGGGATAACAGCGCAATCCTATCCGAGAGTCCATATCGACAATAGGGTTTACGA  
CCTCGATGTTGGATCAGGACATCCTAATGGTGCAGCAGCTATTAAAGGTTTCGTTTGTTC AAC  
GATTAAAGTCCTACGTGATCTGAGTTCAGACCGGAGCAATCCAGGTCGGTTTCTATCTATTC  
AAATAATTTCTCCCAGTACGAAAGGACAAGAGAAATAAGGCCTACTTCTCTGAAGCGCCTTA  
AGACCAATAGATGAATTTATCTAAATCTAGTAAATCTAACTCCAATATTGCCCAAGAGACAG  
GGCTTTGTTAGGGTGGCAGAGCCCGGTAATTGTGCAAACTTAAACTCTTGTGTCCAGAGGT  
TCAATTCCTCTCCCTAGCATATGTTTATAATTAACATCTTCTCACTAATTGTACCTATTCTTCT  
TGCTGTAGCCTTTCTGACTCTAGTAGAACGAAAAGTACTAGGCTACATACAGCTTCGAAAAG  
GCCCAAATATTGTAGGTCCATATGGTCTCCTACAACCAATCGCAGATGCCGTAAAACCTTTT  
ACTAAAGAACCTTTACGACCACTTACGTCATCCATAACTATATTTATTATAGCCCCTATTCTA  
GCCTTAACACTAGCTCTGACCATGTGAGTCCCCTTACCAATACCGCACCCCCTTATTAACATA  
AACCTAGGAGTACTATTCATACTAGCTATATCAAGTCTAGCTGTATACTCTATTCTCTGATCT  
GGATGAGCCTCAAACCTCAAATATGCCCTAATTGGAGCCCTACGAGCCGTAGCTCAAACGAT  
CTCATATGAAGTCACACTAGCCATTATCCTTTTATCCGTTCTACTAATAAATGGCTCATTTAC  
GCTATCCACGCTAATCATTACCCAAGAACATCTTTGATTAATCTTCCCTGCATGACCACTAGC

TATAATATGATTTATTTCTACCCTAGCAGAAACAAATCGAGCCCCCTTTGACCTAACAGAAG  
GAGAATCAGAACTAGTCTCTGGGTTTAATGTCGAATATGCAGCAGGTCCATTTGCCCTGTTC  
TTCCTAGCAGAATATGCCAACATCATCATAATAAATGCTCTTACAACCTATTCTATTCTTCGGA  
GCATTTACAGCCCCCTACATACCAGAATTATACATTGTTAATTTTACCGTAAAACTTTACTC  
CTCACAATCTCTTTTCTATGAATCCGAGCATCATATCCTCGATTCCGATACGACCAACTAATA  
CACCTACTATGAAAAAACTTTCTACCTCTCACACTAGCTCTATGTATATGACATGTAACCTCTA  
CCTATTATTACAGCAAGCATTCCACCTCAAACGTAAGAAATATGTCTGACAAAAGAATTACT  
TTGATAGAGTAAGCCATAGGGGTTTAAGTCCCCTTATTTCTAGAATCATAGGAATCGAACCT  
AATCTTAAGAACTCAAAAATCTTCGTGCTACCTAACTACACCATATCCTAAAGTAAGGTCAG  
CTAAATAAGCTATCGGGCCCATAACCCCGAAAATGTTGGTTTATCCCCTTCCCATACTAATAA  
AACCAGCCATCCTTATTACCATTACATCCACCGTTGTCTTAGGAACTATAATTGTTCTATTTA  
GCTCCCCTGATTTCATAATCTGAGTTGGCTTTGAAATAAATATACTAGCCATTATCCCAATTC  
TAATAAAAAAATATAACCCACGAGCCATAGAAGCTTCCACAAAATATTTTCTAACACAAGCT  
ACAGCATCCATGCTTCTAATGCTAAGCATCATCAATCTACTATGCTCAGGACACTGGAC  
AGTTTCAACAATTCCCAATCCAGTAGCATCTACCATAATTACTATTGCTCTAACAATAAACT  
TGGCCTATCACCATTTCACTTTTGAGTCCAGAAAGTTACACAAGGCATTTCCCTTATCTTCAGG  
AATAATCCTATTAACATGACAAAAAATTGCACCTTTATCCATTCTATACCAAATTTACCATC  
CGTTAACTCAAATCTCTTACTAATAATAGCTATCACATCCATACTGGTAGGAGGCTGAGGAG  
GATTAAATCAAACCCAACTCCGAAAAATCTTGGCATACTCCTCAATTACCCATATAGGCTGA  
ATGGCTGCTATTATAGTATATAATCCTACCCTAGCAATTCTTAACCTAACAATTTACATCATA  
ATAACTCTAGGAACATTTATACTATTTCATACATAGCTCATCTACAACAACACTATCACTATCT  
TATACATGAAATAAATTTCCCATTAATAGCCCCACTAATCTTAATACTTATACTATCACTAGGA  
GGCCTCCCTCCTCTCTCAGGCTTTATCCCCAAATGAATAATTATTCAAGAATTAACAAAAAA  
CGACATAATTATTATACCTACACTTATAGCCATTACAGCCCTACTAAACCTATATTTTACAC  
ACGCCTAACATATACTACAGCACTAACTATATTTCCCGCAACAAATAATATAAAAAATAAAAT  
GACAATTCGAAACCACAAAAAAGACAACCTCTCCTAGCCCCCTCTAATCGTGACATCAACTATA  
CTACTACCACTAACCCCAATACTAGCAGCTCTTGATTAGAGATTTAGGCTAAACAGACCAAG  
GGCCTTCAAAGCCTCAAGTAAGTGAAGTCCACTTAATCTCTGCAATATTTAAGGACTGCAA  
GAATCTACCTCACATCAACTGAACGCAAAACAATCGCTTTAATTAAGCTAAGCCCTTCTAGA  
TCGGTGGGCTTTTACCCACAAAACTTTAGTTAACAGCTAAAAACCCTAGACAACCTGGCTTC  
AATCTACTTCTCCCGCCGCGTAGGAAAAAAGGCGGGAGAAGCCCCGGCAGAATTGAAGCT  
GCTTCTTTGAATTTGCAATTCAATATGATTACTCACCACAGAGCCTGGTAAAAAGAGGACTT  
AACCCCCATTCTTAGATTTACAGTCTAGTGCTTTTATCAGCCATTTTACCTATGTTCAATTAACC  
GATGACTGTTTTCCACCAACCACAAAGATATTGGCACTCTTTATCTTCTGTTTGGCGCATGAG  
CTGGTATAACGGGCACTGCTCTTAGCCTTCTAATCCGTGCTGAATTAGGTCAGCCTGGAGCT  
CTGTTAGGAGATGACCAAATTTACAATGTAGTTGTAAGTGGCCACGCATTCGTAATAATCTT  
CTTTATAGTTATGCCTATTATGATCGGAGGCTTTGGAAATTGACTAGTACCTTTGATAATTGG  
TGCGCCTGATATAGCATTTCCCCGAATAAACAATATGAGTTTCTGATTACTACCTCCATCCTT  
TCTTCTCCTTCTGGCTTCTTCCATAGTAGAAGCAGGCGCAGGGACTGGATGAACTGTATACC  
CTCCTCTAGCAGGTAACCTTAGCCCATGCAGGAGCATCAGTAGACCTAACAACTTTTTCTCTA  
CATCTGGCAGGGGTTTCTTCTATTTTAGGGGCTATTAACCTTTATTACCACTATCATCAACATG  
AAACCCCCTGCAATATCTCAATATCAAACCTCCCCTATTCGTGTGATCAGTACTTATCACAGCA  
GTACTTCTCCTTCTATCTTTACCAGTCTTAGCAGCTGGAATTACTATACTACTTACAGATCGA  
AATCTCAATACTACTTTCTTCGACCCGGCCGGAGGAGGGGATCCCATTCTATATCAACATCT  
ATTTTGATTCTTTGGCCATCCTGAAGTCTATATTCTAATCCTCCCTGGGTTTGAATAATTTCA  
CACATTGTCACATACTATTACAGGAAAGAAAGAGCCCTTTGGTTATATGGGAATAGTGTGGGC  
AATAATGTCAATTGGATTCTTAGGATTTATTGTATGGGCCCATCATATATTTACTGTAGGCAT  
AGATGTTGATACACGAGCCTATTTTACCTCGGCCACTATAATTATTGCAATCCCGACAGGAG  
TTAAAGTATTCAGCTGACTAGCTACCCTGCATGGAGGAAATATTAAGTGATCCCCTGCCATA  
ATGTGAGCCCTAGGTTTTCATTTTCTATTTACAGTAGGGGGTCTTACAGGCATTGTTCTAGCT  
AACTCATCTCTGGACATTGTCCTCCATGACACATACTACGTAGTAGCACACTTCCACTATGTA

CTATCAATAGGGGCCGTGTTTCGCTATTATAGGAGGCTTCGTCCATTGATTCCCATTATTTTCG  
GGCTATACACTTAATAATACATGAGCAAAAATTCACCTTCGTAATTATATTTGTTGGAGTCAA  
TATAACATTCTTCCCCCAGCACTTCCTAGGTCTATCAGGTATGCCTCGACGATATTCTGATTA  
TCCAGACGCCTATACAGCATGAAACACAGTGTCTTCAATGGGTTTCATTTCATTTCACTAACAG  
CAGTTATGTTAATAATTTTCATAATTTGAGAAGCCTTCGCATCTAAACGAGAAGTGGCAGTG  
ATTGAGCTTACTACAATAATATTGAATGGCTCCACGGATGTCCTCCCCCATAACCATAACATTC  
GAAGAGCCCCGCCACGTCATACTGAAATAAGAAAGGAAGGAATCGAACCTCTAGAATTGG  
TTTCAAGCCAGCATCATAACCACTATGTCTCTCTCAATAAAGAGGTATTAGTAAAAATTACA  
TAACTTTGTCAAAGTTGAATTATAGGTGAAAATCCTTTATATCTCTATGGCGCATCCCTTTCA  
AACAGGCCTTCAAGATGCAACTTCCCCCATCATGGAAGAACTCCTACACTTCCATGATCATA  
CACTAATAATTGTATTCTTAATTAGTTCCCTTAGTTCTCTATATCATTTCATTATATTAECTAC  
TAAATTAACACATACAAATACAATAGACGCACAAGAAGTGGAGACAGTATGAACTATTCTA  
CCAGCTATCATCTTAATTATAATTGCACCTCCATCACTACGAATTCTTTATATGATAGATGAA  
ATTAATAACCCATCATTAECTGTAAAGACTATGGGGCATCAATGATACTGAAGCTATGAGTA  
TACAGATTATGAAGACTTGAGCTTCGATTCTTATATAACCCCAACACAAGAATTAAAGCCCCG  
GAGAGCTGCGATTACTAGAGGTAGATAATCGAGTAGTACTACCCATAGAAATAACAATTCG  
CATATTAATTTCTCAGAAGATGTGCTACATTCGTGAGCTGTCCCATCTCTAGGACTAAAAA  
CTGATGCAATCCCGGGGCGATTAAATCAAACAACCTCTTATGGCCATGCGACCAGGACTATAT  
TATGGCCAATGCTCAGAGATTTGCGGTTCTAATCATAGCTTTATACCCATTGTACTTGAAATA  
GTTCCGCTGTCTTACTTTGAAAAATGATCCGCTTCAATACTATAAAATCATTAAGAAGCTTTA  
TAGCGTTAACCTTTTAAGTTAAAGACTGAGAGTGCAAGTCTCTCCTTAATGGAAATGCCACA  
ATTAGACACATCCACATGATTTATTACAATCCTATCCATGATCTTAACACTATTTATTATATT  
TCAGTTAAAAGTCTCAAAACACAACCTATCCTGAGTTTCCTGAATTA AAAACAACCCCACTAT  
CAAAAAAACCTATGCCTTGAGAAGAAAAATGAACGAAAATCTGTTTCGCCTCTTTTACTACCC  
CAATGATAATAGGAGTACCAATTGTGGTTCTGATTATTATTTCCCAAGTATCTTATTTCCT  
CACCTAATCGATTAATCAATAATCGCCTAGCTACTGTCCAACAATGATTAATTCAATTAGTAT  
CTAAGCATATACTGTCTATTACAAATTATAAAGGACAAACCTGAGCGCTAATACTAATGTCA  
TTAATTTTATTATTGGCTCAACTAACCTTTTAGGCCTATTACCACATTCATTACACCTACTA  
CACAACCTATCAATAAATTTAGGAATGGCCATTCTCTGTGAGCAGGTACAGTAGTTATAGGA  
TTTCGACACAAAACCTAAGGCATCTCTGGCCCACTTTCTACCCCAAGGAACACCTCTTCCTCTG  
ATCCCAATGTTAGTAATTATCGAGACAATTAGTCTGTTTATTCAACCTGTGGCCCTAGCTGTA  
CGACTGACCGCTAATATTACTGCAGGCCATCTACTTATTCATTTAATCGGAGGGGCTACCCT  
AGTTTTAATAAACATTAACCCTGTAAACAGCCCTAATTACCTTTATTATTCTTATTCTACTTACT  
ATTCTCGAATTAGCTGTAGCTCTTATCCAAGCCTATGTTTTACCCCTACTAGTTAGTCTATAC  
TTACATGATAATACCTAATGATCCACCAAACACATGCATATCATATAGTTAACCCCAAGCCCA  
TGGCCACTTACAGGAGCTCTCTCGGCTCTTCTTATAACATCAGGACTAATTATATGATTTTAC  
TTTAACTCGGTATACTTACTAATACTAGGCCTCACCACCAACATACTTACCATGTACCAATGA  
TGACGAGATATCGTCCGGGAAAGTACCTTCCAAGGCCATCACACCCCAATCGTCCAAAAAG  
GACTACGATATGGAATAGTCTTATTTATTGTATCAGAAGTATTTTTCTTCGCGGGGATTCTTTT  
GGGCCTTCTACCACTCAAGCCTAGCACCTACTCCTGAATTAGGAGCATGTTGACCACCTACA  
GGTATCATCCCCTTAAATCCGCTAGAAGTTCCACTACTTAACACCTCTGTACTTCTAGCATCT  
GGGGTATCTATCACTTGAGCTCATCATAGTCTAATAGAAGGAGACCGCAAACATATGCTCCA  
AGCCCTATTTATTACTATTTCACTAGGAGTTTATTTTACACTTCTACAAGCCTCAGAATACTA  
TGAGACATCCTTTACTATTTAGATGGAGTGTATGGTTCAACCTTCTTTATAGCAACTGGATT  
TCATGGGCTTCATGTAATTATTGGTTCAACTTTTCTTACTGTGTGTTTCTACGACAACCTGCAC  
TTTCACTTTACATCCAACCATCACTTTGGCTTTGAAGCGGCAGCATGATACTGACACTTCGTA  
GACGTTGTATGGCTTTTCTTTATGTTTCTATTTACTGATGAGGATCCTACTTCTTTAGTATTA  
ACTAGTACGATTGACCTCCAATCAATAGGCTCTGGTACAAGCCAGAAAGAAGTAATAAACC  
TAATTCTAGCACTTCTAACCAACGTATTATTAGCCTCTCTGCTCGTTCTTATTGCATTCTGACT  
GCCACAACCTAAATATCTATGCAGAAAAAGTAAGTCCTTATGAATGTGGATTGATCCTATAG  
GATCAGCACGCCTTCCTTTCTCTATAAAATTTTTTCTAGTAGCTATTACATTCCTTTTATTCTGA

CTTAGAAATTGCTCTACTCCTCCCGCTTCCTTGAGCATTACAGACTAACAACCTTAATAACTAT  
ACTTATTATAGCTCTATTACTCATTTCCCTATTAGCCGCAAGCCTAGCTTATGAGTGAACCGA  
AAAAGGGCTAGAATGGGCCGAATATGATAATTAGTTTAAACTAAAATAAGTGATTTTCGACTC  
ACTAGATTATGACTAACATCATAATTATCAAATGTCTGTGGTCTATATTAATCTCTTTCTAGC  
CTTTACTATATCCTTAATAGGGCTACTCATCTATCGATCCCATTTAATATCCTCCCTATTATGC  
TTAGAAGGCATGATGCTGTCACTATTTGTTATACTAGCAGTAACAATCCTAAGTAACCACTT  
CACACTAGCCAGTATGACTCCAATCATTCTATTAGTATTTCGCTGCCTGTGAAGCAGCGTTGG  
GGCTTTCTCTGCTAGTAATAGTCTCTAATACCTATGGAAGTACTACGTACAAAATCTTAACC  
TCCTACAATGCTAAAAATTATCCTCCCTACCATAATACTAGTACCCCTTACATGAATATCAAA  
GCCTAACATAATCTGAATTAATACAACAACCTATAGTCTACTCATCAGCCTTATTAGTCTGAC  
ATATCTCAATCAACTCAGTGATAATAGTCTAAACTTCTCATTAACATTCTTTACCGACTCCCT  
ATCAGCCCCCTGTTAGTTCTCACAACATGACTACTGCCCTTAATACTTATAGCTAGTCAATT  
TCACCTGTCAAAAAGAGACCCTGACCCGGAATAATTATATACAAATACTAATTCTCCTGC  
AACTATTCTTAATTATAACATTTTCTGCTACTGAGTTAATCATATTCTATATTTTATTGAAGC  
TACCCTGGTACCGACTTTAGTTATCATTACTCGATGAGGAAACCAAACGAAACGACTAAACG  
CGGGCCTCTATTTTTTATTCTACACCTTAGTAGGATCCTTGCCCTTACTAGTTGCACTGTTATA  
TGCCCAAAACAGCTTAGGATCACTAAATTTTCTCATAGTACAGTACTGAACTCAGCCCTTGC  
CAAATTCCTGATCTAACATTTTTCATGTGGCTGGCATGTATAATAGCATTTCATAGTAAAAATA  
CCGCTATATGGCTTACACCTATGACTACCTAAAGCACATGTAGAAGCTCCTATTGCAGGATC  
CATAGTACTTGCTGCAGTACTTCTAAAACCTAGGGGGATACGGTATAATGCGGATTACAACAA  
TACTCAACCCTCTAACAAATTTTATAGCCTACCCCTTCATAATGCTCTCACTATGAGGAATAA  
TCATAACAAGTTCTATTTGTTTACGCCAGACAGACCTAAAGTCCCTAATTGCATACTCCTCTG  
TTAGTCACATAGCCCTAGTCATTGTAGCAATTCTAATCCAATCCCCATGAAGCTACATAGGA  
GCTACTGCTCTAATAATCGCCCATGGGTAAACATCTTCTATGCTATTCTGTCTTGCAAACCTCT  
AACTACGAGCGAACCCTAGCCGAACCTATAATTCTCGCACGGGGCTTGCAAACGCTTCTTCC  
ACTTATAGCAGCTTGATGACTATTAGCAGGCCTAACTAACTTAGCTCTTCCCTCCTACAATTAA  
TCTGATTGGGGAACCTGTTTGTAGTGATAGCCACATTTTCATGATCCAATATTACCATTCTCTT  
AATAGGAGTTAACATTACCATTACTGCTCTCTACTCTCTATATATACTAATTTCTACACAGCG  
AGGCAAGTATACAGACCACATCAAAAATATTAAGCCATCTTATACACGAGAAAATGCCTTA  
ATAGCCTTACATTTACTACCCCTTTTACTTCTATCTCTTAAACCCTAAAGTAGTTCTAGGCTTTA  
TTTACTGTAAATATAGTTTAAACAAAACATTAGATTGTGAATCTAGTAATAAAAGCTTAAAT  
CTTTTTATTTACCGAAAAAGCATGCAAGAAGTCTAATTCATGCACCCATGCATAAAATCAT  
GGCTTTTTCACTTTTAGGGGATAGAAGTAATCCATTGGTCTTAGGAGCCAAAAAATTGGTG  
CAACTCCAAATAAAAGTAATTAACCTACTTACCTCCTTACCATTACAACCCTATTTATATTA  
ATCATGCCCATTATCCTAACCTGTACCCCGCATATGAAAATAAACTTTACCCGCAATATGT  
AAAAACCACAGTCTCTTATGCCTTCACAATTAGCATAATTCCCATAGTAATATTCATCCACTC  
CGGACAAGAAGCAATCATCTCAAACCTGACACTGAATAACCATCCAAACCCTAAAACCTCAGT  
CTAAGCTTCAAATTAGATTACTTTTCAATAATCTTCGTACCAGTGGCCCTATTTCGTACATGG  
TCAATTATAGAATTCTCTATATGATATATACACGCAGATCCTAACATTAACCGATTCTTTAA  
TATCTACTTATATTCCTCGTCACGATAATAATTCTAGTAACCGCAAATAATCTATTTTCAGCTA  
TTTATCGGCTGAGAGGGAGTAGGAATCATATCATTCTCCTCATTGGATGATGATATGGACG  
AACAGATGCTAATACGGCTGCCCTACAAGCAGTACTATACAACCGCATTGGAGATGTTGGTT  
TTATCATGGCCATAGCTTGATTCTTACTCAATACAAATGCATGGGACTTCCAACAAATCTTTA  
TAATCGAGCATAAAAACCTCAATATTCCACTGGCAGGACTACTTCTAGCAGCTACCGGAAAG  
TCTGCCCAATTTGGACTTCACCCATGACTCCCATCAGCCATAGAAGGCCCCACTCCTGTCTCA  
GCACTACTTCACTCTAGCACAATAGTAGTAGCAGGCGTATTTCTTCTAGTCCGATTTACCCCC  
TTAATAGAACATAACAAGACAATTCAAACGGTTACCCTATGCTTAGGGGCAATAACAACCTT  
GTTTACAGCAATCTGCGCCCTTACCCAAAATGATATCAAAAAAATTATTGCCTTCTCCACCTC  
GAGCCAACTAGGACTAATAATTGTAACAATTGGTATTAATCAGCCTCATCTGGCCTTTCTCC  
ATATCTGCACGCACGCATTCTTCAAGGCCATGCTATTTCTATGCTCCGGATCTATTATTCATA  
GTCTAAACAACGAACAAGATATTCGAAAGATAGGAGGGCTATTTAAAAGTCTACCATTTACC

ACTACTGCTCTAATCATCGGAACTCTAGCACTTACAGGAATGCCCTTCTTAACAGGATTTTAC  
TCCAAAGACTTAATTATTGAAACCGCCAATACGTCATACACCAACGCCTGAGCCTTACTAAC  
AACCCTTATCGCCACATCCATAACTGCCGCCTACAGTACTCGAATTGTATTTTTTACACTTCT  
AGGACAACCTCGCTATAGTCCCATTATCACCATTAACGAGAATAACCAGTTCCTGACTAACT  
CTGTCAAACGATTGCTACTAGGAAGTATCTTTGCGGGATTCTTAATCTCTCATAACATTACAC  
CCACCCTGTCCCACAAATAACCATGCCCTGTCACCTAAAAATGATAGCCCTTACAGTAACA  
ATCCTAGGCTTTATTCTAGCACTAGAACTTAACCTAGCCATACAAAATCTCAAATTTGACTAC  
CCTTTAAGCACGTTCAAATTTTCAAATCAACTAGGATATTTCCCTACTACTCTGCATCGTCTC  
GCACCAATAATAGGTCTATCAATAAGCCAAAAAACAGCATCCATACTGCTAGATGCAATCTG  
ACTAGAGAATGTTCTACCAAAGTCCATCTCCTACTTTCAAATAAAAATCCTCAATCACAGTCTC  
CAACCAAAAAGGGACTAATTAACTATACTTTCTCTCCTTTATAATTACACTAATCTTAAGTCT  
CTTTATACTTAATTTCCACGAGTGACTTCCATAATTACCAATACACCAATAAGGAGAGATCA  
TCCAGTAACAATAACTAATCAAGTACCATAACTATATAAAGCTGCAATTTCCCATAGCCTCTT  
CACTAAAAAATCCTGAATCCCCGTGTGTCATAAATCACCCAATCTCCTATTCCATTAAACTTAA  
ATACTACCTCGGCTTCATCATCCTTTAAAAATATAACAAACAGCCAGTAACTCAGACAACAGA  
CCTACAATAAATGCACCTAGTACAGCCTTATTAGAAAGTCAAACCTCAGGATATTGCTCAGT  
GGCTATGGCCGTAGTGTACCCGAACACTACAAGTATACCCCTAAATAAATTA AAAAGACC  
ATTA AACCCAAAAAAGATCCTCCAAAGCTTAACACAATACCACACCCTACACCCCACTAAC  
AATCAAGACTAAACCTCCGTAGATAGGAGAGGGCTTAGAAGAAAACCCCGCAAAACTAACT  
ACAAAAACGATACTTAAAATAGATACAATGTATGTTATCATCATTCTTACATGGAATCTAAC  
CATGACCAATGACATGAAAAATCATCGTTGTATTTCAACTATAAGAACCCCAATGATCAACA  
TCCGAAAAACTCATCCATTAGTTAAAATTATCAACAACCTCATTGACCTTCCAACACCAT  
CAAACATTTCAACATGATGGAACCTTTGGGTCCCTGTTAGGAGTGTGTCTGATCTTGCAAATCT  
TAACAGGCTTATTTCTAGCCATACACTATACATCAGATACAGCTACAGCCTTTTCATCAGTCG  
CACACATTTGTGCGAGACGTCAACTATGGTTGATTTATCCGATATATACATGCCAATGGGGCC  
TCTATATTTTTTATCTGCCTATTTATACACGTAGGGCGAGGCTTATACTATGGATCATACTA  
TTTCCAGAGACATGGAATATCGGAATTATTCTCCTACTTACAGTTATAGCCACAGCATTCTA  
GGGTATGTACTACCTTGAGGACAAATATCCTTCTGAGGAGCAACCGTCATTACTAACCTACT  
ATCAGCAATTCCTTACATTGGCACTAATCTAGTGGAGTGAGTCTGAGGGGGTTTCTCCGTAG  
ATAAAGCAACACTAACCCGATTTTTTGCTTTTCACTTTATCCTTCCATTTATCATCTCAGCACT  
AGCAATAGTCCATCTATTATTCCTTACGAAACAGGATCTAATAACCCCTCCGGAATTCCAT  
CTGACCCAGACAAAATCCCATTTTACCCCTATCATACAATTAAAGACATCCTAGGCGTCCTA  
TTTCTTGTCTCGCCTTAATAACCCCTGGCTTTATTCTCACCAGACCTGTTAGGAGACCCTGAT  
AACTATACCCCTGCAATCCACTAAGTACCCCGCCACATATTAAGCCTGAATGGTACTTTCT  
ATTTGCCTACGCTATCCTGCGATCTATTCTTAATAAACTAGGAGGGGTGCTAGCTCTAATCTT  
CTCTATTCTAATTCTAACTATTATTCCACTATTACATACATCCAAACAACGAAGCATGATATT  
CCGACCTCTAAGTCAATGCTTATTCTGACTCCTAGTAGCAGACCTACTCACACTAACATGAA  
TTGGAGGACAGCCAGTAGAACACCCCTTCATTATTATTGGGCAATTGGCCTCTATTCTCTACT  
TTACAATTCTTCTAGTACTTATACCTATCACTAGCATTATTGAGAATAGCCTCTCAAAATGAA  
GAGTCTTTGTAGTATATTAATTACTTTGGTCTTGTAACCAAAAACGGAGATTCTCTACTTC  
TCCCTAAGACTCAAGGAAGGAGCAACAACCCCACTACCAGCACCCAAAGCTGGTGTCTACT  
TAAACTATCCCCTG

>SRR6109208 (circular) ReOrganized

ATACTATAAATCCACCTCTCATTTTATTTCACTTCATACATGTTATTACACACTCTGTGCCATC  
ATAGTATGTTTTCATACATCCTCCCTTCTTTACACCCTATGTATATCGTACATTAATGGTGTA  
CCCCCCTCCCCCTATGTATATCGTGCATTAATGGCGTGCCCCATGCATATAAGCATGTACA  
TACTGTGCTTGGCTTTACATGAGGATACTCATTACAAGAACTTATTTCAAGCGATAGTCTATG  
AGCATGTATTTCACTTAGTCCAAGAGCTTGATACCAAGCCTCGAGAAACCAGCAATCCTTG  
CGAGTACGTGTACCTCTTCTCGCTCCGGGCCCATAATTTGTGGGGGTTTCTATACTGAACTA  
TACCTGGCATCTGGTTCTTACCTCAGGGCCATGTTAGCGTCAACTCAATCCTACTAACCCCTTC  
AAATGGGACATCTCGATGGACTAATGACTAATCAGCCCATGATCACACATAACTGTGGTGTC

ATGCATTTGGTATTTTTTAATTTTAGGGGGGGAACCTTGCTATGACTCAGCTATGACCGTAAAG  
GTCTCGTCGCAGTCAAATCAGCTGTAGCTGGGCTTATTCATCTTTTCGAGGCTCCTCATAGACA  
CCCATAAGGTGCAATTCAGTCAATGGTCACAGGACATAACACTATAGATCACCCGGAAGTGGC  
GTTACGTGTACGCACGTGTACGCACGTGTACGTACGTGTACGCACGTGTACGTACGTGTACG  
CACGTGTACGTACGTGTACGCACGTGTACGTACGTGTACGCACGTGTACGTACGTGTACGCA  
CGTGTACGCACGTGTACGCACGTGTACGTACGTGTACGCACGTGTACGTACGTGTACGCATG  
TGTACGTACGTGTACGCACGTGTACGTACGTGTACGTACGTGTACGCACGTGTACGTACGTG  
TACGCACGTGTACGCACGTGTACGTACGTGTACGCACGTGTACGCACGTGTACGCACGTGTA  
CGCGTACGTATTTTAGATACTAAGTTAGCTTAGACAAACCCCCCTTACCCCCGTAACCTCAA  
GAAGCTTACATATACTTATGGATGTCCTGCCAAACCCCCAAAAACAAGACTAAATATATGCGC  
AAACATGAAGTCACTTACACCTAAACCCATATAATTAAGCTAACCCCCCAGCCAATGTTGCA  
ACAACACGGACATGGGACTCTAAATTTTAATTTATCTATAGATATTTTTCTTTTACTGTGTC  
TCCCCAGCATTGATTTTTTAACCTATCATTATTCACACCACCAATTTCCATTGAGCTATTTTAC  
ATGAGTTCCAAATCAATTATGTTTCATGTAGCTTAACGAATAAAGCAAGGTACTGAAAATGCC  
TAGATGGGTACGCTACCCCATAGACATAAAGGTTTGGTCCTAGCCTTCCTATTAGCCATTA  
ACAAGATTACACATGTAAGTCTCCACGCTCCAGTGAAAATGCCCCCTAAGTCCCTCTTAGACG  
ACCTAAAGGAGCGGGTATCAAGCACACCTTATGGTAGCTCACAACGCCTTGCTTAGCCACAC  
CCCCACGGGAAACAGCAGTGATAAAAATTAAGCTATGAACGAAAGTTCGACTAAGCTATGT  
TAATACTAGGGTTGGTAAATCTCGTGCCAGCCACCGCGGTACATACGATTAACTCGAGTTAAT  
AGGCCTACGGCGTAAAGCGTGTAAAAGAAAAAATCTCCTCTACTAAAGTTAAAGTATGATT  
AAGCTGTAAAAAGCTACCATTAATACTAAAAATAAAGTACGAAAGTGACTTTAAATTTCTGA  
TTACACGATAGCTAGGGCCCAAACCTGGGATTAGATACCCCACTATGCCTAGCTCTAAACATA  
GATATTTTACTAAACAAAACCTATTCGCCAGAGAACTACTAGCAACAGCTTAAACCTCAAAGG  
ACTTGGCGGTGCTTTATATCCCCCTAGAGGAGCCTGTTCTGTAATCGATAAACCCCGATAGA  
CCTCACCATCCCTTGCTAATTCAGTTTATATACCGCCATCTTCAGCAAACCCCTTAAAGGAAA  
AAAAGTAAGCATAACTACCCTACATAAAAAAGTTAGGTCAAGGTGTAACCTATGGGCTGGG  
AAGAAATGGGCTACATTTTCTATTCAAGAACAACCTTCTACGAAAACCTTTTATGAACTAAAA  
GCTAAAGGCGGATTTAGTAGTAAATTAAGAATAGAGAGCTTAATTGAACAGGGCAATGAAG  
CACGCACACACCGCCCGTCACCCTCCTCGAGTGATATAATTTAATTATAACCTATTTAACTA  
AGCAAAGCATAAGAGGAGACAAGTCGTAACAAGGTAAGCATACTGGAAAGTGTCCTTGAT  
GAGCCAAAGTGTAAGCTTAAACAAAGCGTCTGGCTTACATCCAGAAGATTTTATTAAATATG  
ACTACTTTGAACCCAAAGCTAGCCCAAGCAACAATGACTAGTAAACCATTAATGAAACATTC  
AAACAAAACATTTAGTAGCATGACTAGAGTATAGGAGATAGAAATTTTAACTGGAGCTAT  
AGAGAGAGTACCGCAAGGGAATGATGAAAGATTACCTAAAGTGATAAACAGCAAAGATTGC  
CCCTTCTACCTTTTGTATAATGAGTTAGCTAGAAATAACTTAACAAAGAGAACTTAAGCTAA  
GTCCCCCGAAACCAGACGAGCTACCTATGAACAATCCACTGGGATGAACTCATCTATGTTGC  
AAAATAGTGAGAAGATCCATAGGTAGAGGTGAAAGGCCTAACGAGCCTGGTGATAGCTGGT  
TGCCCAGAATAGAATTTTAGTTCGACTTTAAACCTGCCTACAAAATAATAATTCTAATGCA  
GATTTAAATATATTCTAAAAAGGTACAGCTTTTTAGAGTTAAGGATACAGCCTTACTTAGA  
GAGTAAATATTTATATAAGCCATAGTAGGCCTAGAGGCAGCCATCAATTAAGAAAGCGTTA  
AAGCTCAACATCTCTATTAACCTAATACCAAGAATATTTAATCAACTCCTAATGTATTACTGG  
GTCAATCTATTTAAATATAGAAGTGATAATGCTAATATGAGTAACAAGAAATATTTCTCCCA  
TGCATAAGCTTATAACAGCAACGGATAACCACTGATAGTTAACAACAACATAGAAATAACC  
TAATGATAAAACACCTATTAAATCAATTGTTAGTCCAACACAGGCATGCAATCAGGGAAAG  
ATTAAGAAAGAGTGAAAGGAACTCGGCAAACACAAACCCCGCCTGTTTACCAAAAACATCAC  
CTCCAGCATTTCAGTATTGGAGGCACTGCCTGCCCGGTGACATCAGTTAAACGGCCGCGGT  
ATTCTGACCGTGCAAAGGTAGCATAATCATTTGTTCTCTAAATAAGGACTTGTATGAACGGC  
CACACGAGGGTTTAACTGTCTCTTACTTCCAATCAGTGAAATTGACCTCCCCGTGAAGAGGC  
GGGGATAAGACAATAAGACGAGAAGACCCTATGGAGCTTTAATTAATACTAATTCAAAAAGAA  
ACTACTAACGACCCAACAGGAATAATATATCTCTTTTATGAATTAGCAATTTAGGTTGGGGC  
GACCTCGGAGGACAAAATAGCCTCCGAGTGATTATAAATCTAGACTTACCAGTCAAAATGCT

TAATCACTTATTGATCCAAAAATTCTTTTGATCAACGGAACAAGTTACCCTAGGGATAACAG  
CGCAATCCTATCCGAGAGTCCATATCGACAATAGGGTTTACGACCTCGATGTTGGATCAGGA  
CATCCTAATGGTGCAGCAGCTATTAAGGTTTCGTTTGTTC AACGATTAAAGTCCTACGTGAT  
CTGAGTTCAGACCGGAGCAATCCAGGTCGGTTTCTATCTATTCAAATAATTTCTCCCAGTACG  
AAAGGACAAGAGAAATAAGGCCTACTTCTCTGAAGCGCCTTAAGACCAATAGATGAATTTA  
TCTAAATCTAGTAAATCTAACTCCAATATTGCCAAGAGACAGGGCTTTGTTAGGGTGGCAG  
AGCCCGGTAATTGTGCAAACTTAAACTCTTGTGTCCAGAGGTTCAATTCCTCTCCCTAGCAT  
ATGTTTATAATTAACATCTTCTCACTAATTGTACCTATTCTTCTTGCTGTAGCCTTTCTGACTC  
TAGTAGAACGAAAAGTACTAGGCTACATACAGCTTCGAAAAGGCCCAAATATTGTAGGTCC  
ATATGGTCTCCTACAACCAATCGCAGATGCCGTAAAACCTTTACTAAAGAACCTTTACGAC  
CACTTACGTCATCCATAACTATATTTATTATAGCCCCTATTCTAGCCTTAACACTAGCTCTGA  
CCATGTGAGTCCCCTTACCAATACCGCACCCCCCTTATTAACATAAACCTAGGAGTACTATTC  
ATACTAGCTATATCAAGTCTAGCTGTATACTCTATTCTCTGATCTGGATGAGCCTCAAACCTCA  
AAATATGCCCTAATTGGAGCCCTACGAGCCGTAGCTCAAACGATCTCATATGAAGTCACACT  
AGCCATTATCCTTTTATCCGTTCTACTAATAAATGGCTCATTTACGCTATCCACGCTAATCAT  
TACCCAAGAACATCTTTGATTAATCTTCCCTGCATGACCCTAGCTATAATATGATTTATTTT  
TACCCTAGCAGAAACAAATCGAGCCCCCTTTGACCTAACAGAAGGAGAATCAGAACTAGTC  
TCTGGGTTTAATGTCGAATATGCAGCAGGTCCATTTGCCCTGTTCTTCCTAGCAGAATATGCC  
AACATCATCATAATAAATGCTCTTACAACCTATTCTATTCTTCGGAGCATTTTACAGCCCCCTAC  
ATACCAGAATTATACATTGTTAATTTTACCGTAAAAACTTTACTCCTCACAATCTCTTTTCTA  
TGAATCCGAGCATCATATCCTCGATTCCGATACGACCAACTAATACACCTACTATGAAAAAA  
CTTTCTACCTCTCACACTAGCTCTATGTATATGACATGTAACCTCTACCTATTATTACAGCAAG  
CATTCCACCTCAAACGTAAGAAATATGTCTGACAAAAGAATTACTTTGATAGAGTAAGCCAT  
AGGGGTTTAAGTCCCCTTATTTCTAGAATCATAGGAATCGAACCTAATCTTAAGAACTCAAA  
AATCTTCGTGCTACCTAACTACACCATATCCTAAAGTAAGGTCAGCTAAATAAGCTATCGGG  
CCCATACCCCGAAAATGTTGGTTTATCCCCTTCCCATACTAATAAAACCAGCCATCCTTATTA  
CCATTATATCCACCGTTGTCTTAGGAACATAAATTGTTCTATTTAGCTCCCACTGATTTCATAA  
TCTGAGTTGGCTTTGAAATAAATATACTAGCCATTATCCCAATTCTAATAAAAAAATATAAC  
CCACGAGCCATAGAAGCTTCCACAAAATATTTTCTAACACAAGCTACAGCATCCATGCTTCT  
AATGCTAAGCATCATCATCAATCTACTATGCTCAGGACACTGGACAGTTTCAACAATTCCCA  
ATCCAGTAGCATCTACCATAATTACTATTGCTCTAACATAAAACTTGGCCTATCACCATTTC  
ACTTTTGAGTCCCAGAAGTTACACAAGGCATTTCCCTTATCTTCAGGAATAATCCTATTAACAT  
GACAAAAAATTGCACCTTTATCCATTCTATACCAAATTTACCATCCGTAACTCAAATCTCT  
TACTAATAATAGCTATCACATCCATACTGGTAGGAGGCTGAGGAGGATTAAATCAAACCCA  
ACTCCGAAAAATCTTGGCATACTCCTCAATTACCCATATAGGCTGAATGGCTGCTATTATAG  
TATATAATCCTACCCTAGCAATTCTTAACCTAACAAATTTACATCATAATAACTCTAGGAACAT  
TTATACTATTTCATACATAGCTCATCTACAACAACACTATCACTATCTTATACATGAAATAAAT  
TCCCATTAAATAGCCCCACTAATCTTAATACTTATACTATCACTAGGAGGCCTCCCTCCTCTCT  
CAGGCTTTATCCCCAAATGAATAATTATTCAAGAATTAACAAAAAACGACATAATTATTATA  
CCTACACTTATAGCCATTACAGCCCTACTAAACCTATATTTTTACACACGCCTAACATATACT  
ACAGCACTAACTATATTTCCCGCAACAAATAATATAAAAAATAAAATGACAATTCAAAACCA  
CAAAAAAGACAACTCTCCTAGCCCCCTCTAATCGTGACATCAACTATACTACTACCACTAACC  
CCAATACTAGCAGCTCTTGATTAGAGATTTAGGCTAAACAGACCAAGGGCCTTCAAAGCCTC  
AAGTAAGTGAAAATCCACTTAATCTCTGCAATATTTAAGGACTGCAAGAATCTATCTCACAT  
CAACTGAACGCAAAACAATCGCTTTAATTAAGCTAAGCCCTTCTAGATCGGTGGGCTTTTAC  
CCCACAAAACCTTTAGTTAACAGCTAAAAACCCTAGACAACCTGGCTTCAATCTACTTCTCCCG  
CCGCGTAGGAAAAAAGGCGGGGAGAAGCCCCGGCAGAATTGAAGCTGCTTCTTTGAATTTG  
CAATTCAATATGATTACTACCACAGAGCCTGGTAAAAAGAGGACTTAACCCCCATTCTTAG  
ATTTACAGTCTAGTGCTTTTATCAGCCATTTTACCTATGTTTATTAAACCGATGACTGTTTTCCA  
CCAACCACAAGGATATTGGCACTCTTTATCTTCTGTTTGGCGCATGAGCTGGTATAACGGGC  
ACTGCTCTTAGCCTTCTAATCCGTGCTGAATTAGGTCAGCCTGGAGCTCTGTTAGGAGATGA

CCAAATTTACAATGTAGTTGTAACCTGCCACGCATTTCGTAATAATCTTCTTTATAGTTATGCC  
TATTATGATCGGAGGCTTTGGAAATTGACTAGTACCTTTGATAATTGGTGCGCCTGATATAG  
CATTTCCCGAATAAACAATATGAGTTTCTGATTACTACCTCCATCCTTTCTTCTCCTTCTGGC  
TTCTTCCATAGTAGAAGCAGGCGCAGGGACTGGATGAACTGTATACCCCCCTCTAGCAGGTA  
ACTTAGCCCATGCAGGAGCATCAGTAGACCTAACAATCTTTTCTCTACATCTGGCAGGGGTT  
TCTTCTATTTTAGGGGCTATTAACCTTTATTACCACTATCATCAACATGAAACCCCCTGCAATA  
TCTCAATATCAAACCTCCCCTATTCGTGTGATCAGTACTTATCACAGCAGTACTTCTCCTTCTA  
TCTTTACCAGTCTTAGCAGCCGGAATTACTATACTACTTACAGATCGAAATCTCAATACTACT  
TTCTTCGACCCGGCCGGAGGAGGGGATCCCATTCTATATCAACATCTATTTTGATTCTTTGGC  
CATCCTGAAGTCTATATTCTAATCCTCCCTGGGTTTGGGAATAATTTACACATTGTACATAC  
TATTCAGGAAAGAAAGAGCCCTTTGGTTATATGGGAATAGTGTGGGCAATAATGTCAATTGG  
GTTCTTAGGATTTATTGTATGGGCCCATCATATATTTACTGTAGGCATAGATGTTGATACACG  
AGCCTATTTTACCTCGGCCACTATAATTATTGCAATCCCGACAGGAGTTAAAGTATTCAGCT  
GACTAGCTACCCTGCATGGAGGAAATATTAAGTGATCCCCTGCCATAATGTGAGCCCTAGGT  
TTCATTTTTCTATTTACAGTAGGGGGTCTTACAGGCATTGTTCTAGCTAACTCATCTCTGGAC  
ATTGTCCTCCATGACACATACTACGTAGTAGCACACTTCCACTATGTACTATCAATAGGGGC  
CGTGTTTCGCTATTATAGGAGGCTTCGTCCATTGATTCCCATTATTTTCGGGCTATACACTTAA  
TAATACATGAGCAAAAATTCACCTTCGTAATTATATTTGTTGGAGTCAATATAACATTCTTCCC  
CCAGCACTTCCTAGGTCTATCAGGTATGCCTCGACGATATTCTGATTATCCAGACGCCTATAC  
AGCATGAAACACAGTGTCTTCAATGGGTTTCATTTCATTTCACTAACAGCAGTTATGTTAATAA  
TTTTCATAATTTGAGAAGCCTTCGCATCTAAACGAGAAGTGGCAGTGATTGAGCTTACTACA  
ACTAATATTGAATGGCTCCACGGATGTCCTCCCCCATACCATACATTCTGAAGAGCCCGCCTA  
CGTCATACTGAAATAAGAAAGGAAGGAATCGAACCCTCTAGAATTGGTTTCAAGCCAACAT  
CATAACCACTATGTCTCTCTCAATAAAGAGGTATTAGTAAAAATTACATAACTTTGTCAAAG  
TTGAATTATAGGTGAAAATCCTTTATATCTCTATGGCGCATCCCTTTCAAACAGGCCTTCAAG  
ATGCAACTTCCCCCATCATGGAAGAACTCCTACACTTCCATGATCATACTAATAATTGTAT  
TCTTAATTAGTTCCCTAGTTCTCTATATCATTTCGAATTATTAATACTACTAAATTAACACATAC  
AAATACAATAGACGCACAAGAAGTGGAGACAGTATGAACTATTCTACCAGCTATCATCTTA  
ATTATAATTGCACTTCCATCACTACGAATTCCTTTATATGATAGATGAAATTAATAACCCATCA  
TTAACTGTAAAGACTATGGGGCATCAATGATACTGAAGCTATGAGTATACAGATTATGAAGA  
CTTGAGCTTCGATTCTTATATAACCCCAACACAAGAATTAAGCCCGGAGAGCTGCGATTAC  
TAGAGGTAGATAATCGAGTAGTACTACCCATAGAAATAACAATTCGCATATTAATTTCCCTCA  
GAAGATGTGCTACATTTCGTGAGCTGTCCCATCTCTAGGACTAAAACTGATGCAATCCCGGG  
GCGATTAAATCAAACAACCTCTTATGGCCATGCGACCAGGACTATATTATGGCCAATGCTCAG  
AGATTTGCGGTTCTAATCATAGCTTTTATACCCATTGTACTTGAAATAGTTCCGCTGTCTTACT  
TTGAAAAATGATCCGCTTCAATACTATAAAATCATTAAGAAGCTTTATAGCGTTAACCTTTTA  
AGTTAAAGACTGAGAGTGCAAGTCTCTCCTTAATGGAAATGCCACAATTAGACACATCCACA  
TGATTTATTACAATCCTATCCATGATCTTAACACTATTTATTATATTTTCAGTTAAAAGTCTCA  
AAACACAACCTATCCTGAGTTTCCTGAATTA AAAACAACCCCACTATCAAAAAAACCTATGCC  
TTGAGAAGAAAAATGAACGAAAATCTGTTTCGCCCTCTTTTACTACCCCAATGATAATAGGAGT  
ACCAATTGTGGTTCTGATTATTATTTTCCCAAGTATCTTATTTCCCTCACCTAATCGATTAATC  
AATAACCGCCTAGCTACTGTCCAACAATGATTAATTCAATTAGTATCTAAGCATATACTGTCT  
ATTCACAATTATAAAGGACAAACCTGAGCGCTAATACTAATGTCATTAATTTTATTATTGGC  
TCAACTAACCTTTTAGGCCTATTACCACATTCATTACACCTACTACACAACCTATCAATAAAT  
TTAGGAATGGCCATTCCCTCTGTGAGCAGGTACAGTAGTTATAGGATTTTCGACACAAAACCTAA  
GGCATCTCTGGCCCACTTTCTACCTCAAGGAACACCTCTTCCCTCTGATCCAGTGTTAGTAAT  
TATCGAGACAATTAGTCTGTTTATTCAACCTGTGGCCCTAGCTGTACGACTGACCGCTAATAT  
TACTGCAGGCCATCTACTTATTCATTTAATCGGAGGGGCTACCCTAGTTTTAATAAACATTAA  
CCCTGTAAACAGCCCTAATTACCTTTATTATTCTTATTCTACTTACTATTCTCGAATTAGCTGTA  
GCTCTTATCCAAGCCTATGTTTTACCCCTACTAGTTAGTCTATACTTACATGATAATACCTAA  
TGATCCACCAAACACATGCATATCATATAGTTAACCCAAGCCCATGGCCACTTACAGGAGCT



CTCTCGGCTCTTCTTATAACATCAGGACTAATTATATGATTTCACTTTAACTCGGTATACTTA  
CTAATACTAGGCCTCACCACCAACATACTTACCATGTACCAATGATGACGAGATATCGTCCG  
GGAAAGTACCTTCCAAGGCCATCACACCCCAATCGTCCAAAAAGGACTACGATATGGAATA  
GTCTTATTTATTGTATCAGAAGTATTTTTCTTCGCGGGATTCTTTTGGGCCTTCTACCACTCAA  
GCCTAGCACCTACTCCTGAATTAGGAGCATGTTGACCACCTACAGGTATCATCCCCTTAAAT  
CCGCTAGAAGTTCCACTACTTAACACCTCTGTACTTTTAGCATCTGGGGTATCTATCACTTGA  
GCCCATCATAGTCTAATAGAAGGAGACCGTAAACATATGCTCCAAGCCCTATTTATTACTAT  
TTCACTAGGAGTTTATTTTACACTTCTACAAGCCTCAGAATACTATGAGACATCCTTTACTAT  
TTCAGATGGAGTGTATGGTTCAACCTTCTTTATAGCAACTGGATTTTCATGGGCTTCATGTAAT  
TATTGGTTCAACTTTTCTTACTGTGTGTTTTCTACGACAACTGCACCTTCACTTTACATCCAAC  
CATCACTTTGGCTTTGAAGCGGCAGCATGATACTGACACTTCGTAGACGTTGTATGGCTTTTC  
CTTTATGTTTCTATTTACTGATGAGGATCCTACTTCTTTAGTATTAAGTACGATTGACTTC  
CAATCAATAGGCTCTGGTACAAGCCAGAAAGAAGTAATAAACCTAATTCTAGCACTTCTAAC  
CAACGTATTATTAGCCTCTCTGCTCGTTCTTATTGCATTCTGACTGCCACAATAAATATCTA  
TGCAGAAAAAGTAAGTCCTTATGAATGTGGATTTGATCCTGTAGGATCAGCACGCCTTCCTT  
TCTCTATAAAATTTTTCTAGTAGCTATTACATTCCTTTTATTCGACTTAGAAATTGCTCTACT  
CCTCCCGCTTCCTTGAGCATTACAGACTAACAACCTAATAACTATACTTATTATAGCTCTATT  
ACTCATTTCCCTATTAGCCGCAAGCCTAGCTTATGAGTGAACCGAAAAGGGGCTAGAATGGG  
CCGAATATGATAATTAGTTTAACTAAAATAAGTGATTTTCGACTCACTAGATTATGACTAAC  
ATCATAATTATCAAATGTCTGTGGTCTATATTAATCTCTTTCTAGCCTTTACTATATCCTTAAT  
AGGGCTACTCATCTACCGATCCCATTTAATATCCTCCCTATTATGCTTAGAAGGCATGATGCT  
GTCACTATTTGTTATACTAACAGTAACAATCCTAAGTAACCACTTCACACTAGCCAGTATGA  
CTCCAATCATTCTATTAGTATTCGCTGCCTGTGAAGCAGCGTTGGGGCTTTCTCTGCTAGTAA  
TAGTCTCTAATACCTATGGAAGTACTACGTACAAAATCTTAACCTCCTACAATGCTAAAAA  
TTATCCTCCCTACCATAATACTAGTACCCCTTACATGAATATCAAAGCCTAACATAATCTGAA  
TTAATACAACAACCTATAGTCTACTCATCAGCCTTATTAGTCTGACATATCTCAATCAACTCA  
GTGATAATAGTCTAACTTCTCATTAAACATTCTTTACCGACTCCCTATCAGCCCCCTGTAG  
TTCTCACAACATGACTACTGCCCTTAATACTTATAGCTAGTCAATTTACCTGTCAAAAAGAGA  
CCCTGACCCGGAaaaaaATTATATATCACAATACTAATTCTCCTGCAACTATTCTTAATTATAA  
CATTTTCTGCTACTGAGTTAATCATATTCTATATTTTATTTGAAGCTACCCTGGTACCGACTTT  
AGTTATCATTACTCGATGAGGAAACCAACAGAACGACTAAACGCGGGCCTCTATTTTTTAT  
TCTACACCTTAGTAGGATCCTTGCCCTTACTAGTTGCACTGTTATATGCCCAAAACAGCTTAG  
GATCACTAAATTTTCTCATAGTACAGTACTGAACTCAGCCCTTGCCAAATTCCTGATCTAACA  
TTTTCATGTGGCTGGCATGTATAATAGCATTATAGTAAAAATACCGCTATATGGCTTACACC  
TATGACTACCCAAAGCACATGTAGAAGCTCCTATTGCAGGATCCATAGTACTTGCTGCAGTA  
CTTCTAAAACTAGGGGGATACGGTATAATGCGGATTACAACAATACTCAACCCTCTAACAAA  
TTTTATAGCCTACCCCTTCATAATGCTCTCACTATGAGGAATAATCATAACAAGTTCTATTTG  
TTTACGCCAGACAGACCTAAAGTCCCTAATTGCATACTCCTCTGTTAGTCACATAGCCCTAGT  
CATTGTAGCAATTCTAATCCAATCCCCATGAAGCTACATAGGAGCTACTGCTCTAATAATCG  
CCCATGGGTAAACATCTTCTATGCTATTCTGTCTTGCAAACCTCTAACTACGAGCGAACCCATA  
GCCGAACATAATTCTCGCACGGGGCTTGCAAACGCTTCTTCCACTTATAGCAGCTTGATGA  
CTATTAGCAGGCCTAACTAACTTAGCTCTTCCTCCTACAATTAATCTGATTGGGGAACTGTTT  
GTAGTGATAGCCACATTTTCATGATCCAATATTACCATTCTCTTAATAGGAGTTAACATTACC  
ATTACTGCTCTCTACTCTCTATATATACTAATTTCTACACAGCGAGGCAAGTATACAGACCAC  
ATCAAAAATATTAAGCCATCTTATACACGAGAAAAATGCCTTAATAGCCTTACATTTACTACC  
CCTTTTACTTCTATCTCTTAACCCTAAAGTAGTTCTAGGCTTTATTTACTGTAAATATAGTTTA  
ACAAAAACATTAGATTGTGAATCTAGTAATAAAAGCTTAAATCTTTTTATTTACCGAAAAAG  
CATGCAAGAAGTCTAATTCATGCACCCATGCATAAAATCATGGCTTTTCAACTTTTAGGG  
GATAGAAGTAATCCATTGGTCTTAGGAGCCAAAAAATTGGTGCAACTCCAAATAAAAGTAA  
TTAACCTACTTACCTCCTTCACCATTACAACCTCTATTTATATTAATCATGCCATTATCCTAAC  
CTGTACCCCAGCATATGAAAATAAACTTTACCCGCAATATGTAAAAACCACAGTCTCTTATG

CCTTCACAATTAGCATAATTCCCATAGTAATATTCATCCACTCCGGACAAGAAGCAATCATC  
TCAAACCTGACACTGAATAACCATCCAAACCCTAAAACCTCAGTCTAAGCTTCAAATTAGATTA  
CTTTTCAATAATCTTCGTACCAGTGGCCCTATTTCGTACACATGGTCAATTATAGAATTCTCTAT  
ATGATATATACACGCAGATCCTAACATTAACCGATTCTTTAAATATCTACTTATATTCCTCGT  
CACGATAATAATTCTAGTAACCGCAAATAATCTATTTTCAGCTATTCATCGGCTGAGAGGGAG  
TAGGAATCATATCATTCTCCTCATTGGATGATGATATGGACGAACAGATGCTAATACGGCT  
GCCCTACAAGCAGTACTATACAACCGCATTGGAGATGTTGGTTTTATCATGGCCATAGCTTG  
ATTCTTACTCAATACTAATGCATGGGACTTCCAACAAATCTTTATAATCGAACATAAAAACC  
TCAATATTCCACTGGCAGGACTACTTCTAGCAGCTACCGGAAAGTCTGCCCAATTTGGACTT  
CATCCATGACTCCCATCAGCCATAGAAGGCCCCACTCCTGTCTCAGCACTACTTCACTCTAGC  
ACAATAGTAGTAGCAGGCGTATTTCTTCTAGTCCGGTTTTACCCCTTAATAGAACATAACAA  
GACAATTCAAACGGTTACCCTATGCTTAGGGGCAATAACAACCTTGTTTACAGCAATCTGCG  
CCCTTACCCAAAATGATATCAAAAAAATTATTGCCTTCTCCACCTCGAGCCAAGTAGGACTA  
ATAATTGTAACAATTGGTATTAATCAGCCTCATCTGGCCTTTCTCCATATCTGCACGCACGCA  
TTCTTCAAGGCCATGCTATTTCTATGCTCCGGATCTATTATTCATAGTCTAAACAACGAACAA  
GATATTGCAAAGATAGGAGGGGCTATTTAAAAGTCTACCATTTACCACTACTGCTCTAATCAT  
CGGAACTCTAGCACTTACAGGAATGCCCTTCTTAACAGGATTTTACTCCAAAGACTTAATTA  
TTGAAACCGCCAATACGTCATACACCAACGCCTGAGCCTTACTAACAACCCCTTATCGCCACA  
TCCATAACTGCCGCCTACAGTACTCGAATTGTATTTTTTACACTTCTAGGACAACCTCGCTAT  
AGTCCCATTATCACCATTAACGAGAATAACCGATTCTGACTAACTCTGTCAAACGATTGCT  
ACTAGGAAGTATCTTTGCGGGATTCTTAATCTCTCATAACATTACACCCACCCTGTCCCACA  
AATAACCATGCCCTGTCACCTAAAAATGATAGCCCTTACAGTAACAATCCTAGGCTTTATTC  
TAGCACTAGAACTTAACCTAGCCATACAAAATCTCAAATTTGACTACCCGTTAAGCACGTTT  
AAATTTTCAAATCAACTAGGATATTTCCCTACTACTCTGCATCGTCTCGCACCAATAATAGGT  
CTATCAATAAGCCAAAAAACAGCATCCATACTGCTAGATGCAATCTGACTAGAGAATGTTCT  
ACCAAAGTCCATCTCCTACTTTCAAATAAAATCCTCAATCACAGTCTCCAACCAAAAAGGGAC  
TAATTAACCTATACTTTCTCTCCTTTATAATTACACTAATCTTAAGTCTCTTTATACTTAATTT  
CCACGAGTGACTTCCATAATTACCAATACACCAATAAGGAGAGATCATCCAGTAACAATAA  
CTAATCAAGTACCATAACTATATAAAGCTGCAATTCCCATAGCCTCTTCACTAAAAAATCCT  
GAATCCCCTGTATCATAAATCACCCAATCTCCTATTCCATTAACTTAAATACTACCTCGGCT  
TCATCATCCTTTAAAAATATAACAAACAGCCAGTAACTCAGACAACAGACCTACAATAAATGC  
ACCTAGTACAGCCTTATTAGAAAGTCAAACCTCAGGATATTGCTCAGTGGCTATGGCCGTAG  
TGTACCCGAACACTACAAGTATACCCCTAAATAAATTAAAAAGACCATTAAACCCAAAAA  
AGATCCTCCAAAGCTTAACACAATACCACACCCTACACCCCACTAACAAATCAAGACTAAAC  
CTCCGTAGATAGGAGAGGGCTTAGAAGAAAACCCCGCAAACTAACTACAAAAACGATACT  
TAAAATAGATACAATGTATGTTATCATCATTCTTACATGGAATCTAACCATGACCAATGACA  
TGAAAAATCATCGTTGTATTTCAACTATAAGAACCCCAATGATCAACATCCGAAAAAATCAT  
CCATTAGTTAAATTTATCAACAACCTCATTGACCTTCCAACACCATCAAACATTTCAACA  
TGATGGAACCTTTGGGTCCCTGTTAGGAGTGTGTCTGATCTTGCAAATCTTAACAGGCTTATTT  
CTAGCCATACACTATACATCAGATACAGCTACAGCCTTTTCATCAGTCGCACACATTTGTCTG  
AGACGTCAACTATGGTTGATTTATCCGATATATACATGCCAATGGGGCCTCTATATTTTTTAT  
CTGCCTATTTATACACGTAGGGCGAGGCTTATACTATGGATCATACCTATTTCCAGAGACAT  
GGAATATCGGAATTATTCTCCTACTTACAGTTATAGCCACAGCATTTCATAGGATATGTACTA  
CCTTGAGGACAAATATCCTTCTGAGGAGCAACCGTCATTACTAACCTACTATCAGCAATTCC  
TTACATTGGCACTAATCTAGTGGAGTGAATCTGAGGGGGTTTCTCCGTAGATAAAGCAACAC  
TAACCCGATTTTTTTGCTTTTCACTTTATCCTTCCATTTATCATCTCAGCACTAGCAATAGTCCA  
TCTATTATTCCTTCACGAAACAGGATCTAATAACCCCTCCGGAATTCATCTGACCCAGACA  
AAATCCCATTTTACCCCTATCATACAATTAAGACATCCTAGGCGTCCTATTTCTTGTCTCG  
CCTTAATAACCCCTGGCTTTATTCTCACCAGACCTGTTAGGAGACCCTGATAACTATACCCCTG  
CAAATCCACTAAGTACCCCGCCACATATTAAGCCTGAATGGTACTTTCTATTTGCCTACGCTA  
TCCTGCGATCTATCCCTAATAAACTAGGAGGGGTGCTAGCTCTAATCTTCTCTATTCTAATTC

TAACTATTATTCCACTATTACATACATCCAAACAACGAAGCATGATATTCCGACCTCTAAGT  
CAATGCTTATTCTGACTCCTAGTAGCAGACCTACTCACACTAACATGAATTGGAGGACAGCC  
AGTAGAACACCCCTTCATTATTATTGGGCAATTGGCCTCTATTCTCTACTTTACAATTCTTCT  
AGTACTTATACCTATCACTAGCATTATTGAGAATAGCCTCTCAAAATGAAGAGTCTTTGTAG  
TATATTAATTACTTTGGTCTTGTAACCAAAAACGGAGATTCTCTACTTCTCCCTAAGACTC  
AAGGAAGGAGCAACAACCCCACTACCAGCACCCAAAGCTGGTGTCTACTTAAACTATCCCC  
TG

>SRR6109209 (circular) ReOrganized

ATACTATAAATCCACCTCTCATTTTATTCACTTCATACATGTTATTACACACTCTGTGCCATC  
ATAGTATGTTTTATACATCCTCCCTTCTTTCACACCCTATGTATATCGTACATTAATGGTGTA  
CCCCCCCCCTCCCCCTATGTATATCGTGCATTAATGGCGTGCCCCATGCATATAAGCATGTAC  
ATACTGTGCTTGGCTTTACATGAGGATACTCATTACAAGAACTTATTTCAAGCGATAGTCTAT  
GAGCATGTATTTCACTTAGTCCAAGAGCTTGATCACCAAGCCTCGAGAAACCAGCAATCCTT  
GCGAGTACGTGTACCTCTTCTCGCTCCGGGGCCATAAATTTGTGGGGGTTTCTATACTGAACT  
ATACCTGGCATCTGGTTCTTACCTCAGGGCCATGTTAGCGTCAACTCAATCCTACTAACCCTT  
CAAATGGGACATCTCGATGGACTAATGACTAATCAGCCCATGATCACACATAACTGTGGTGT  
CATGCATTTGGTATTTTTTAATTTTAGGGGGGGAACCTTGCTATGACTCAGCTATGACCGTAAA  
GGTCTCGTCGCAGTCAAATCAGCTGTAGCTGGGCTTATTCATCTTTCGAGGCTCCTCATAGAC  
ACCCATAAGGTGCAATTCAGTCAATGGTCACAGGACATAACACTATAGATCACCCGGACTG  
GCGTTACGTGTACGCACGTGTACGCACGTGTACGTACGTGTACGCACGTGTACGTACGTGTA  
CGCATGTGTACGTACGTGTACGCACGTGTACGTACGTGTACGTACGTGTACGCACGTGTACG  
CACGTGTACGCACGTGTACGCACGTGTACGCACGTGTACGTACGTGTACGCACGTGTACGCA  
CGTGTACGCACGTGTACGCGTACGTATTTTAGATACTAAGTTAGCTTAGACAAACCCCCCTT  
ACCCCCCGTAACTTCAAGAAGCTTACATATACTTATGGATGTCCTGCCAAACCCCCAAAAACA  
AGACTAAATATATGCGCAAACATGAAGTCACTTACACCTAAACCCATATAATTAAGCTAACC  
CCCCAGCCAATGTTGCAACAACACTACGGACATGGGACTCTAAATTTTAATTTATCTATAGATA  
TTTTTCTTTTACTGTGTCTCCCCAGCATTGATTTTTTAATATCATTATTCCACACCACCAATT  
TCCATTGAGCTATTTACATGAGTTCCAAATCAATTATGTTTCATGTAGCTTAACGAATAAAGC  
AAGGTACTGAAAATGCCTAGATGGGTACGCTACCCCATAGACATAAAGGTTTGGTCTAGC  
CTTCCTATTAGCCATTAACAAGATTACACATGTAAGTCTCCACGCTCCAGTGAAAATGCCCC  
TTAAGTCCTCTTAGACGACCTAAAGGAGCGGGTATCAAGCACACCTTATGGTAGCTCACAAC  
GCCTTGCTTAGCCACACCCCCACGGGAAACAGCAGTGATAAAAATTAAGCTATGAACGAAA  
GTTGACTAAGCTATGTTAATACTAGGGTTGGTAAATCTCGTGCCAGCCACCGCGGTCATAC  
GATTAACCTCGAGTTAATAGGCCTACGGCGTAAAGCGTGTAAGAAAGAAAAATCTCCTCTACTA  
AAGTTAAAGTATGATTAAGCTGTAAAGCTACCATTAATACTAAAATAAACTACGAAAGT  
GACTTTAAAATTTCTGATTACACGATAGCTAGGGCCCCAACTGGGATTAGATACCCCACTAT  
GCCTAGCTCTAAACATAGATATTTTACTAAACAAAACCTATTCGCCAGAGAACTACTAGCAAC  
AGCTTAAAACTCAAAGGACTTGGCGGTGCTTTATATCCCCCTAGAGGAGCCTGTTCTGTAAT  
CGATAAACCCCGATAGACCTCACCATCCCTTGCTAATTCAGTTTATATACCGCCATCTTCAGC  
AAACCCCTTAAAGGAAAAAAAGTAAGCATAACTACCCTACATAAAAAAGTTAGGTCAAGGT  
GTAACCTATGGGCTGGGAAGAAATGGGCTACATTTTCTATTCAAGAACAACCTTCTACGAAAA  
CTTTTATGAACTAAAAGCTAAAGGCGGATTTAGTAGTAAATTAAGAATAGAGAGCTTAATT  
GAACAGGGCAATGAAGCACGCACACACCCGCCCGTCACCCTCCTCGAGTGATATAATTTAATT  
ATAACCTATTTAACTAAGCAAAGCATAAGAGGAGACAAGTCGTAACAAGGTAAGCATACT  
GGAAAGTGTGCTTGGATGAGCCAAAGTGTAAGCTTAAACAAAGCGTCTGGCTTACATCCAGA  
AGATTTTATTAATATATGACTACTTTGAACCCAAAGCTAGCCCAAGCAACAATGACTAGTAA  
AACCATTATGAAACATTCAAACAAAACATTTAGTAGCATGACTAGAGTATAGGAGATAGAA  
ATTTTAACTGGAGCTATAGAGAGAGTACCGCAAGGGAATGATGAAAGATTACCTAAAGTG  
ATAAACAGCAAAGATTGCCCCCTTCTACCTTTTGTATAATGAGTTAGCTAGAAATAACTTAAC  
AAAGAGAACTTAAGCTAAGTCCCCCGAAACCAGACGAGCTACCTATGAACAATCCACTGGG  
ATGAACTCATCTATGTTGCAAAATAGTGAGAAGATCCATAGGTAGAGGTGAAAGGCCTAAC

GAGCCTGGTGATAGCTGGTTGCCCAGAATAGAATTTTAGTTCGACTTTAAACCTGCCTACAA  
AACTAATAATTCTAATGCAGATTTAAAATATATTCTAAAAAGGTACAGCTTTTTAGAGTTAA  
GGATACAGCCTTACTTAGAGAGTAAATATTTATATAAGCCATAGTAGGCCTAGAGGCAGCCA  
TCAATTAAGAAAGCGTTAAAGCTCAACATCTCTATTAACCTAATACCAAGAATATTTAATCA  
ACTCCTAATGTATTACTGGGTCAATCTATTTAAATATAGAAGTGATAATGCTAATATGAGTA  
ACAAGAAATATTTCTCCCATGCATAAGCTTATAACAGCAACGGATAACCACTGATAGTTAAC  
AACAACATAGAAATAACCTAATGATAAAACACCTATTAAATCAATTGTTAGTCCAACACAG  
GCATGCAATCAGGGAAAGATTAAAAGAAGTGAAAGGAACCTCGGCAAACACAAACCCCGCCT  
GTTTACCAAAAACATCACCTCCAGCATTTCAGTATTGGAGGCACTGCCTGCCCGGTGACAT  
CAGTTAAACGGCCGCGGTATTCTGACCGTGCAAAGGTAGCATAATCATTGTCTCTAAATA  
AGGACTTGATGAACGGCCACACGAGGGTTAACTGTCTTACTTCCAATCAGTGAAATTG  
ACCTCCCGGTGAAGAGGGCGGGGATAAGACAATAAGACGAGAAGACCTATGGAGCTTTAAT  
TAACTAATTCAAAAAGAACTACTAACGACCCAACAGGAATAATATATCTCTTTTATGAATT  
AGCAATTTAGGTTGGGGCGACCTCGGAGGACAAAATAGCCTCCGAGTGATTATAAATCTAG  
ACTTACCAGTCAAAATGCTTAATCACTTATTGATCCAAAAATTCTTTTGATCAACGGAACAA  
GTTACCCTAGGGATAACAGCGCAATCCTATCCGAGAGTCCATATCGACAATAGGGTTTACGA  
CCTCGATGTTGGATCAGGACATCCTAATGGTGCAGCAGCTATTAAAGGTTTCGTTTGTTCAAC  
GATTAAAGTCCTACGTGATCTGAGTTCAGACCGGAGCAATCCAGGTCGGTTTCTATCTATTC  
AAATAATTTCTCCCAGTACGAAAGGACAAGAGAAATAAGGCCTACTTCTCTGAAGCGCCTTA  
AGACCAATAGATGAATTTATCTAAATCTAGTAAATCTAACTCCAATATTGCCCAAGAGACAG  
GGCTTTGTTAGGGTGGCAGAGCCCGTAATTGTGCAAACTTAACTCTTGTGTCCAGAGGT  
TCAATTCCTCTCCCTAGCATATGTTTATAATTAACATCTTCTCACTAATTGTACCTATTCTTCT  
TGCTGTAGCCTTTCTGACTCTAGTAGAACGAAAAGTACTAGGCTACATACAGCTTCGAAAAG  
GCCCAATATTGTAGGTCCATATGGTCTCCTACAACCAATCGCAGATGCCGTAAAACCTCTTT  
ACTAAAGAACCTTTACGACCACTTACGTCATCCATAACTATATTTATTATAGCCCCTATTCTA  
GCCTTAACACTAGCTCTGACCATGTGAGTCCCCTTACCAATACCGCACCCCTTATTAACATA  
AACCTAGGAGTACTATTCATACTAGCTATATCAAGTCTAGCTGTATACTCTATTCTCTGATCT  
GGATGAGCCTCAAACCTCAAATATGCCCTAATTGGAGCCCTACGAGCCGTAGCTCAAACGAT  
CTCATATGAAGTCACACTAGCCATTATCCTTTTATCCGTTCTACTAATAAATGGCTCATTTAC  
GCTATCCACGCTAATCATTACCCAAGAACATCTTTGATTAAATCTTCCCTGCATGACCACTAGC  
TATAATATGATTTATTTCTACCCTAGCAGAAACAAATCGAGCCCCCTTTGACCTAACAGAAG  
GAGAATCAGAACTAGTCTCTGGGTTTAAATGTGCAATATGCAGCAGGTCCATTTGCCCTGTTC  
TTCCTAGCAGAATATGCCAACATCATCATAATAAATGCTCTTACAACCTATTCTATTCTTCGGA  
GCATTTACAGCCCCTACATACCAGAATTATACATTGTTAATTTTACCGTAAAACTTTACTC  
CTCACAATCTCTTTTCTATGAATCCGAGCATCATATCCTCGATTCCGATACGACCAACTAATA  
CACCTACTATGAAAAAACTTTCTACCTCTCACACTAGCTCTATGTATATGACATGTAACCTCTA  
CCTATTATTACAGCAAGCATTCCACCTCAAACGTAAGAAATATGTCTGACAAAAGAATTACT  
TTGATAGAGTAAGCCATAGGGGTTTAAAGTCCCCTTATTTCTAGAATCATAGGAATCGAACCT  
AATCTTAAGAACTCAAAAATCTTCGTGCTACCTAACTACACCATATCCTAAAGTAAGGTCAG  
CTAAATAAGCTATCGGGCCCATAACCCCGAAAATGTTGGTTTATCCCCTTCCCATACTAATAA  
AACCAGCCATCCTTATTACCATTATATCCACCGTTGTCTTAGGAACCTATAATTGTTCTATTTA  
GCTCCCCTGATTTCATAATCTGAGTTGGCTTTGAAATAAATATACTAGCCATTATCCCAATTC  
TAATAAAAAAATATAACCCACGAGCCATAGAAGCTTCCACAAAATATTTTCTAACACAAGCT  
ACAGCATCCATGCTTCTAATGCTAAGCATCATCATCAATCTACTATGCTCAGGACACTGGAC  
AGTTTCAACAATTTCCAATCCAGTAGCATCTACCATAATTACTATTGCTCTAACAATAAACT  
TGGCCTATCACCATTTCACTTTTGAGTCCCAGAAGTTACACAAGGCATTTCTTATCTTCAGG  
AATAATCCTATTAACATGACAAAAAATTGCACCTTTATCCATTCTATACCAAATTTACCATC  
CGTAACTCAAATCTCTTACTAATAATAGCTATCACATCCATACTGGTAGGAGGCTGAGGAG  
GATTAAATCAAACCCAACCTCCGAAAAATCTTGGCATACTCCTCAATTACCCATATAGGCTGA  
ATGGCTGCTATTATAGTATATAATCCTACCCTAGCAATTCTTAACCTAACAATTTACATCATA  
ATAACTCTAGGAACATTTATACTATTTCATACATAGCTCATCTACAACAACACTATCACTATCT

TATACATGAAATAAATTCCCATTAATAGCCCCACTAATCTTAATACTTATACTATCACTAGGA  
GGCCTCCCTCCTCTCTCAGGCTTTATCCCCAAATGAATAATTATTCAAGAATTAACAAAAA  
CGACATAATTATTATACCTACACTTATAGCCATTACAGCCCTACTAAACCTATATTTTACAC  
ACGCCTAACATATACTACAGCACTAACTATATTTCCCGCAACAAATAATATAAAAAATAAAAT  
GACAATTCAAAACCACAAAAAAGACAACCTCTCCTAGCCCCCTCTAATCGTGACATCAACTATA  
CTACTACCACTAACCCCAATACTAGCAGCTCTTGATTAGAGATTTAGGCTAAACAGACCAAG  
GGCCTTCAAAGCCTCAAGTAAGTGAATAATCCACTTAATCTCTGCAATATTTAAGGACTGCAA  
GAATCTATCTCACATCAACTGAACGCAAAACAATCGCTTTAATTAAGCTAAGCCCTTCTAGA  
TCGGTGGGCTTTTACCCACAAAACTTTAGTTAACAGCTAAAAACCCTAGACAACCTGGCTTC  
AATCTACTTCTCCCGCCGCTAGGAAAAAAGGCGGGAGAAGCCCCGGCAGAATTGAAGCT  
GCTTCTTTGAATTTGCAATTCAATATGATTACTCACCACAGAGCCTGGTAAAAAGAGGACTT  
AACCCCCATTCTTAGATTTACAGTCTAGTGCTTTTATCAGCCATTTTACCTATGTTCAATTAACC  
GATGACTGTTTTCCACCAACCACAAGGATATTGGCACTCTTTATCTTCTGTTTGGCGCATGAG  
CTGGTATAACGGGCACTGCTCTTAGCCTTCTAATCCGTGCTGAATTAGGTCAGCCTGGAGCT  
CTGTTAGGAGATGACCAAATTTACAATGTAGTTGTAAGTGGCCACGCATTCGTAATAATCTT  
CTTTATAGTTATGCCTATTATGATCGGAGGCTTTGGAAATTGACTAGTACCTTTGATAATTGG  
TGCGCCTGATATAGCATTTCCCCGAATAAACAATATGAGTTTCTGATTACTACCTCCATCCTT  
TCTTCTCCTTCTGGCTTCTTCCATAGTAGAAGCAGGCGCAGGGACTGGATGAACTGTATACC  
CCCCCTTAGCAGGTAACCTAGCCCATGCAGGAGCATCAGTAGACCTAACAACTTTTTCTCTA  
CATCTGGCAGGGGTTTCTTCTATTTTAGGGGCTATTAACCTTTATTACCACTATCATCAACATG  
AAACCCCCCTGCAATATCTCAATATCAAACCTCCCCTATTCGTGTGATCAGTACTTATCACAGCA  
GTACTTCTCCTTCTATCTTTACCAGTCTTAGCAGCCGGAATTACTATACTACTTACAGATCGA  
AATCTCAATACTACTTTCTTCGACCCGGCCGGAGGAGGGGATCCCATTCTATATCAACATCT  
ATTTTGATTCTTTGGCCATCCTGAAGTCTATATTCTAATCCTCCCTGGGTTTGAATAATTTCA  
CACATTGTCACATACTATTCAAGAAAGAAAGAGCCCTTTGGTTATATGGGAATAGTGTGGGC  
AATAATGTCAATTGGGTTCTTAGGATTTATTGTATGGGCCCATCATATATTTACTGTAGGCAT  
AGATGTTGATACACGAGCCTATTTTACCTCGGCCACTATAATTATTGCAATCCCGACAGGAG  
TTAAAGTATTCAGCTGACTAGCTACCCTGCATGGAGGAAATATTAAGTGATCCCTGCCATA  
ATGTGAGCCCTAGGTTTTCATTTTTCTATTTACAGTAGGGGGTCTTACAGGCATTGTTCTAGCT  
AACTCATCTCTGGACATTGTCCTCCATGACACATACTACGTAGTAGCACACTTCCACTATGTA  
CTATCAATAGGGGCCGTGTTTCGCTATTATAGGAGGCTTCGTCCATTGATTCCCATTATTTTCG  
GGCTATACACTTAATAATACATGAGCAAAAATTCACTTCGTAAATTATATTTGTTGGAGTCAA  
TATAACATTCTTCCCCCAGCACTTCCTAGGTCTATCAGGTATGCCTCGACGATATTCTGATTA  
TCCAGACGCCTATACAGCATGAAACACAGTGTCTTCAATGGGTTTCATTCAATTTCACTAACAG  
CAGTTATGTTAATAATTTTCATAATTTGAGAAGCCTTCGCATCTAAACGAGAAGTGGCAGTG  
ATTGAGCTTACTACAATAATATTGAATGGCTCCACGGATGTCTCCCCCATAACCATACATT  
GAAGAGCCCGCCTACGTCATACTGAAATAAGAAAGGAAGGAATCGAACCCCTCTAGAATTGG  
TTTCAAGCCAACATCATAACCACTATGTCTCTCTCAATAAAGAGGTATTAGTAAAAATTACA  
TAACTTTGTCAAAGTTGAATTATAGGTGAAAATCCTTTATATCTCTATGGCGCATCCCTTTCA  
AACAGGCCTTCAAGATGCAACTTCCCCCATCATGGAAGAACTCCTACACTTCCATGATCATA  
CACTAATAATTGTATTCTTAATTAGTTCCCTTAGTTCTCTATATCATTTCATTATATTAACTAC  
TAAATTAACACATACAAATACAATAGACGCACAAGAAGTGGAGACAGTATGAACTATTCTA  
CCAGCTATCATCTTAATTATAATTGCACTTCCATCACTACGAATTCTTTATATGATAGATGAA  
ATTAATAACCCATCATTAACTGTAAAGACTATGGGGCATCAATGATACTGAAGCTATGAGTA  
TACAGATTATGAAGACTTGAGCTTCGATTCTTATATAACCCCAACACAAGAATTAAGCCCCG  
GAGAGCTGCGATTACTAGAGGTAGATAATCGAGTAGTACTACCCATAGAAATAACAATTTCG  
CATATTAATTTCTCAGAAGATGTGCTACATTCGTGAGCTGTCCCATCTCTAGGACTAAAAA  
CTGATGCAATCCCGGGGCGATTAAATCAAACAACCTTTATGGCCATGCGACCAGGACTATAT  
TATGGCCAATGCTCAGAGATTTGCGGTTCTAATCATAGCTTTATACCCATTGTACTTGAAATA  
GTTCCGCTGTCTTACTTTGAAAAATGATCCGCTTCAATACTATAAAATCATTAAGAAGCTTTA  
TAGCGTTAACCTTTTAAGTTAAAGACTGAGAGTGCAAGTCTCTCCTTAATGGAAATGCCACA

ATTAGACACATCCACATGATTTATTACAATCCTATCCATGATCTTAACACTATTTATTATATT  
TCAGTTAAAAGTCTCAAAACACAACCTATCCTGAGTTTCCTGAATTA AAAACAACCCCACTAT  
CAAAAAAACCTATGCCTTGAGAAGAAAAATGAACGAAAATCTGTTTCGCTCTTTTACTACCC  
CAATGATAATAGGAGTACCAATTGTGGTTCTGATTATTATTTCCCAAGTATCTTATTTCCCT  
CACCTAATCGATTAATCAATAACCGCCTAGCTACTGTCCAACAATGATTAATTCAATTAGTA  
TCTAAGCATATACTGTCTATTACAAATTATAAAGGACAAACCTGAGCGCTAATACTAATGTC  
ATTAATTTTATTTATTGGCTCAACTAACCTTTTAGGCCTATTACCACATTCATTCACACCTACT  
ACACAACCTATCAATAAAATTTAGGAATGGCCATTCTCTGTGAGCAGGTACAGTAGTTATAGG  
ATTTGACACAAAACTAAGGCATCTCTGGCCCACTTTCTACCTCAAGGAACACCTCTTCCTCT  
GATCCCAGTGTTAGTAATTATCGAGACAATTAGTCTGTTTATTCAACCTGTGGCCCTAGCTGT  
ACGACTGACCGCTAATATTACTGCAGGCCATCTACTTATTCATTTAATCGGAGGGGCTACCC  
TAGTTTTAATAAACATTAACCCGTGAACAGCCCTAATTACCTTTATTATTCTTATTCTACTTAC  
TATTCTCGAATTAGCTGTAGCTCTTATCCAAGCCTATGTTTTACCCTACTAGTTAGTCTATA  
CTTACATGATAATACCTAATGATCCACCAAAACACATGCATATCATATAGTTAACCCAAGCCC  
ATGGCCACTTACAGGAGCTCTCTCGGCTCTTCTTATAACATCAGGACTAATTATATGATTTCA  
CTTTAACTCGGTATACTTACTAATACTAGGCCTCACCACCAACATACTTACCATGTACCAATG  
ATGACGAGATATCGTCCGGGAAAGTACCTTCCAAGGCCATCACACCCCAATCGTCCAAAAA  
GGACTACGATATGGAATAGTCTTATTTATTGTATCAGAAGTATTTTTCTTCGCGGGATTCTTT  
TGGGCCTTCTACCACTCAAGCCTAGCACCTACTCCTGAATTAGGAGCATGTTGACCACCTAC  
AGGTATCATCCCCTTAAATCCGCTAGAAGTTCCACTACTTAACACCTCTGTACTTTTAGCATC  
TGGGGTATCTATCACTTGAGCCCATCATAGTCTAATAGAAGGAGACCGTAAACATATGCTCC  
AAGCCCTATTTATTACTATTTCACTAGGAGTTTATTTTACACTTCTACAAGCCTCAGAATACT  
ATGAGACATCCTTTACTATTTCAAGATGGAGTGTATGGTTCAACCTTCTTTATAGCAACTGGAT  
TTCATGGGCTTCATGTAATTATTGGTTCAACTTTTCTTACTGTGTGTTTTCTACGACAACTGCA  
CTTTCACTTTACATCCAACCATCACTTTGGCTTTGAAGCGGCAGCATGATACTGACACTTCGT  
AGACGTTGTATGGCTTTTCTTTTATGTTTCTATTTACTGATGAGGATCCTACTTCTTTAGTATT  
AACTAGTACGATTGACTTCCAATCAATAGGCTCTGGTACAAGCCAGAAAGAAGTAATAAAC  
CTAATTCTAGCACTTCTAACCAACGTATTATTAGCCTCTCTGCTCGTTCTTATTGCATTCTGAC  
TGCCACAACATAAATATCTATGCAGAAAAAGTAAGTCCTTATGAATGTGGATTGTATCCTGTA  
GGATCAGCACGCCTTCTTTCTCTATAAAATTTTTTCTAGTAGCTATTACATTCCTTTTATTCTG  
ACTTAGAAATTGCTCTACTCCTCCCGCTTCTTGAGCATTACAGACTAACAACTTAATAACTA  
TACTTATTATAGCTCTATTACTCATTTCCCTATTAGCCGCAAGCCTAGCTTATGAGTGAACCG  
AAAAGGGGCTAGAATGGGCCGAATATGATAATTAGTTTAACTAAAATAAGTGATTTTCGAC  
TCACTAGATTATGACTAACATCATAATTATCAAATGTCTGTGGTCTATATTAATCTCTTTCTA  
GCCTTTACTATATCCTTAATAGGGCTACTCATCTACCGATCCCATTTAATATCCTCCCTATTAT  
GCTTAGAAGGCATGATGCTGTCACTATTTGTTATACTAACAGTAACAATCCTAAGTAACCAC  
TTCACACTAGCCAGTATGACTCCAATCATTCTATTAGTATTCGCTGCCTGTGAAGCAGCGTTG  
GGGCTTTCTCTGCTAGTAATAGTCTCTAATACCTATGGAACCTGACTACGTACAAAATCTTAAC  
CTCCTACAATGCTAAAAATTATCCTCCCTACCATAATACTAGTACCCCTTACATGAATATCAA  
AGCCTAACATAATCTGAATTAATACAACAACCTATAGTCTACTCATCAGCCTTATTAGTCTG  
ACATATCTCAATCAACTCAGTGATAATAGTCTAAACTTCTCATTAACATTCTTTACCGACTCC  
CTATCAGCCCCCTGTAGTTCTCACAACATGACTACTGCCCTTAATACTTATAGCTAGTCAA  
TTTCACCTGTCAAAAGAGACCCCTGACCCGGAAAAAATTATATATCACAATACTAATTCTCCT  
GCAACTATTCTTAATTATAACATTTTCTGCTACTGAGTTAATCATATTCTATATTTTATTTGAA  
GCTACCCTGGTACCGACTTTAGTTATCATTACTCGATGAGGAAACCAACAGAACGACTAAA  
CGCGGGCCTCTATTTTTTATTCTACACCTTAGTAGGATCCTTGCCCTTACTAGTTGCACTGTTA  
TATGCCCAAAACAGCTTAGGATCACTAAATTTTCTCATAGTACAGTACTGAACTCAGCCCTT  
GCCAAATTCCTGATCTAACATTTTCATGTGGCTGGCATGTATAATAGCATTCTATAGTAAAAA  
TACCGCTATATGGCTTACACCTATGACTACCCAAAGCACATGTAGAAGCTCCTATTGCAGGA  
TCCATAGTACTTGCTGCAGTACTTCTAAAACCTAGGGGGGATACGGTATAATGCGGATTACAAC  
AATACTCAACCCCTCTAACAAATTTTATAGCCTACCCCTTCATAATGCTCTCACTATGAGGAAT

AATCATAACAAGTTCTATTTGTTTACGCCAGACAGACCTAAAGTCCCTAATTGCATACTCCTC  
TGTTAGTCACATAGCCCTAGTCATTGTAGCAATTCTAATCCAATCCCCATGAAGCTACATAG  
GAGCTACTGCTCTAATAATCGCCCATGGGTAAACATCTTCTATGCTATTCTGTCTTGCAAAC  
CTAACTACGAGCGAACCCATAGCCGAACATAAATTCTCGCACGGGGCTTGCAAACGCTTCTT  
CCACTTATAGCAGCTTGATGACTATTAGCAGGCCTAACTAACTTAGCTCTTCCTCCTACAATT  
AATCTGATTGGGGAACCTGTTTGTAGTGATAGCCACATTTTCATGATCCAATATTACCATTCTC  
TTAATAGGAGTTAACATTACCATTACTGCTCTCTACTCTCTATATATACTAATTTCTACACAG  
CGAGGCAAGTATACAGACCACATCAAAAATATTAAGCCATCTTATACACGAGAAAATGCCT  
TAATAGCCTTACATTTACTACCCCTTTTACTTCTATCTCTTAACCCTAAAGTAGTTCTAGGCTT  
TATTTACTGTAAATATAGTTTAAACAAAAACATTAGATTGTGAATCTAGTAATAAAAGCTTAA  
ATCTTTTTATTTACCGAAAAAGCATGCAAGAACTGCTAATTCATGCACCCATGCATAAAATC  
ATGGCTTTTTCAACTTTTAGGGGATAGAAGTAATCCATTGGTCTTAGGAGCCAAAAAATTGG  
TGCAACTCCAAATAAAAGTAATTAACCTACTTACCTCCTTCACCATTACAACCTCTATTTATAT  
TAATCATGCCCATTATCCTAACCTGTACCCCGAGCATATGAAAATAAACTTTACCCGCAATAT  
GTAAAAACACAGTCTCTTATGCCTTCACAATTAGCATAATTCCCATAGTAATATTCATCCAC  
TCCGGACAAGAAGCAATCATCTCAAACCTGACACTGAATAACCATCCAAACCCTAAAACCTCA  
GTCTAAGCTTCAAATTAGATTACTTTTTCAATAATCTTCGTACCAGTGGCCCTATTCGTCACAT  
GGTCAATTATAGAATTCTCTATATGATATATACACGCAGATCCTAACATTAACCGATTCTTTA  
AATATCTACTTATATTCCTCGTCACGATAATAATTCTAGTAACCGCAAATAATCTATTTACAGC  
TATTCATCGGCTGAGAGGGAGTAGGAATCATATCATTCTCCTCATTGGATGATGATATGGA  
CGAACAGATGCTAATACGGCTGCCCTACAAGCAGTACTATACAACCGCATTGGAGATGTTGG  
TTTTATCATGGCCATAGCTTGATTCTTACTCAATACTAATGCATGGGACTTCCAACAAATCTT  
TATAATCGAACATAAAAAACCTCAATATTCCACTGGCAGGACTACTTCTAGCAGCTACCGGAA  
AGTCTGCCCAATTTGGACTTCATCCATGACTCCCATCAGCCATAGAAGGCCCCACTCCTGTCT  
CAGCACTACTTCACTCTAGCACAAATAGTAGTAGCAGGCGTATTTCTTCTAGTCCGGTTTTACC  
CCTTAATAGAACATAACAAGACAATTCAAACGGTTACCCTATGCTTAGGGGCAATAACAACC  
TTGTTTACAGCAATCTGCGCCCTTACCCAAAATGATATCAAAAAAATTATTGCCTTCTCCACC  
TCGAGCCAACTAGGACTAATAATTGTAACAATTGGTATTAATCAGCCTCATCTGGCCTTTCTC  
CATATCTGCACGCACGCATTCTTCAAGGCCATGCTATTTCTATGCTCCGGATCTATTATTCAT  
AGTCTAAACAACGAACAAGATATTCGAAAGATAGGAGGGCTATTTAAAAGTCTACCATTTA  
CCACTACTGCTCTAATCATCGGAACCTCTAGCACTTACAGGAATGCCCTTCTTAACAGGATTTT  
ACTCCAAAGACTTAATTATTGAAACCGCCAATACGTCATACACCAACGCCTGAGCCTTACTA  
ACAACCCTTATCGCCACATCCATAACTGCCGCCTACAGTACTCGAATTGTATTTTTTACACTT  
CTAGGACAACCTCGCTATAGTCCCATATCACCATTAAACGAGAATAACCAGTTCCTGACTAA  
CTCTGTCAAACGATTGCTACTAGGAAGTATCTTTGCGGGATTCTTAATCTCTCATAACATTAC  
ACCCACCACTGTCCCACAAATAACCATGCCCTGTCACCTAAAAATGATAGCCCTTACAGTAA  
CAATCCTAGGCTTTATTCTAGCACTAGAACTTAACCTAGCCATACAAAATCTCAAATTTGACT  
ACCCGTAAAGCACGTTCAAATTTTCAAATCAACTAGGATATTTCCCTACTACTCTGCATCGTC  
TCGCACCAATAATAGGTCTATCAATAAGCCAAAAAACAGCATCCATACTGCTAGATGCAATC  
TGACTAGAGAATGTTCTACCAAAGTCCATCTCCTACTTTCAAATAAAAATCCTCAATCACAGT  
CTCCAACCAAAAGGGACTAATTAACTATACTTTCTCTCCTTTATAATTACACTAATCTTAAG  
TCTCTTTATACTTAATTTCCACGAGTGACTTCCATAATTACCAATACACCAATAAGGAGAGAT  
CATCCAGTAACAATAACTAATCAAGTACCATAACTATATAAAGCTGCAATTCCCATAGCCTC  
TTCATAAAAAATCCTGAATCCCCTGTATCATAAATCACCCAATCTCCTATTCCATTAAACTT  
AAATACTACCTCGGCTTCATCATCCTTTAAAATATAACAAACAGCCAGTAACCTCAGACAACA  
GACCTACAATAAATGCACCTAGTACAGCCTTATTAGAAAGTCAAACCTCAGGATATTGCTCA  
GTGGCTATGGCCGTAGTGTACCCGAACACTACAAGTATACCCCTAAATAAATTAAAAAGAC  
CATTAAACCAAAAAAAGATCCTCCAAAGCTTAACACAATACCACACCCTACACCCCCACTAA  
CAATCAAGACTAAACCTCCGTAGATAGGAGAGGGCTTAGAAGAAAACCCCGCAAAACTAAC  
TACAAAAACGATACTTAAATAGATACAATGTATGTTATCATCATTCTTACATGGAATCTAA  
CCATGACCAATGACATGAAAAATCATCGTTGTATTTCAACTATAAGAACCCCAATGATCAAC

ATCCGAAAACTCATCCATTAGTTAAAATTATCAACAACCTATTTCATTGACCTTCCAACACC  
ATCAAACATTTCAACATGATGGAACCTTGGGTCCCTGTTAGGAGTGTGTCTGATCTTGCAAA  
TCTTAACAGGCTTATTTCTAGCCATACACTATACATCAGATACAGCTACAGCCTTTTCATCAG  
TCGCACACATTTGTGCGAGACGTCAACTATGGTTGATTTATCCGATATATACATGCCAATGGG  
GCCTCTATATTTTTTATCTGCCTATTTATACACGTAGGGCGAGGCTTATACTATGGATCATACT  
CTATTTCCAGAGACATGGAATATCGGAATTATTCTCCTACTTACAGTTATAGCCACAGCATTCT  
ATAGGATATGTACTACCTTGAGGACAAATATCCTTCTGAGGAGCAACCGTCATTACTAACCT  
ACTATCAGCAATTCCTTACATTGGCACTAATCTAGTGGAGTGAATCTGAGGGGGTTTCTCCG  
TAGATAAAGCAACACTAACCCGATTTTTTTGCTTTTCACTTTATCCTTCCATTTATCATCTCAGC  
ACTAGCAATAGTCCATCTATTATTCCTTCACGAAACAGGATCTAATAACCCCTCCGGAATTC  
CATCTGACCCAGACAAAATCCCATTTTACCCCTATCATACAATTAAGACATCCTAGGCGTC  
CTATTTCTTGTCTCGCCTTAATAACCCCTGGCTTTATTCTCACCAGACCTGTTAGGAGACCCT  
GATAACTATACCCCTGCAAATCCACTAAGTACCCCGCCACATATTAAGCCTGAATGGTACTT  
TCTATTTGCCTACGCTATCCTGCGATCTATCCCTAATAAACTAGGAGGGGTGCTAGCTCTAAT  
CTTCTCTATTCTAATTCTAACTATTATTCCTACTATTACATACATCCAAACAACGAAGCATGAT  
ATTCCGACCTCTAAGTCAATGCTTATTCTGACTCCTAGTAGCAGACCTACTCACACTAACATG  
AATTGGAGGACAGCCAGTAGAACACCCCTTCATTATTATTGGGCAATTGGCCTCTATTCTCT  
ACTTTACAATTCTTCTAGTACTTATACCTATCACTAGCATTATTGAGAATAGCCTCTCAAAAT  
GAAGAGTCTTTGTAGTATATTAATTACTTTGGTCTTGTAACCAAAAACGGAGATTCTCTAC  
TTCTCCCTAAGACTCAAGGAAGGAGCAACAACCCCACTACCAGCACCCAAAGCTGGTGTCT  
ACTTAACTATCCCCTG

>SRR6109210 AssemblyGraph Reorganized

ATACTATAAATCCACCTCTCATTTTATTCACTTCATACATGCTATTACACACTCTGTGCCATC  
ATAGTATGTTTTCATACATCCTCCCTTCTTTACACCCTATGTATATCGTACATTAATGGTGTA  
CCCCCCCCCTCCCCCTATGTATATCGTGCATTAATGGCGTGCCCCATGCATATAAGCATGTAC  
ATACTGTGCTTGGCTTTACATGAGGATACTCATTACAAGAACTTATTTCAAGCGATAGTCTAT  
GAGCATGTATTTCACTTAGTCCAAGAGCTTGATCACCAAGCCTCGAGAAACCAGCAATCCTT  
GCGAGTACGTGTACCTCTTCTCGCTCCGGGCCATAATTTGTGGGGGTTTCTATACTGAACT  
ATACCTGGCATCTGGTTCTTACCTCAGGGCCATGTTAGCGTCAACTCAATCCTACTAACCCCT  
CAAATGGGACATCTCGATGGACTAATGACTAATCAGCCCATGATCACACATAACTGTGGTGT  
CATGCATTTGGTATTTTTTAATTTTAGGGGGGGAACCTTGCTATGACTCAGCTATGACCGTAAA  
GGTCTCGTCGCAGTCAAATCAGCTGTAGCTGGGCTTATTCATCTTTTCGAGGCTCCTCATGGAT  
ACCCATAAGGTGCAATTCAGTCAATGGTCACAGGACATAACACTATAGATCACCCGGACTG  
GCGTTACGTGTACGTACGTGTACGTACGTGTACGTACGTGTACGCACGTGTACGTACGTGTA  
CGTACGTGTACGTACGTGTACGCACGTGTACGTACGTGTACGCACCCGGACTGGCGTTACGT  
GTACGTACGTGTACGTACGTGTACGTACGTGTACGCACGTGTACGTACGTGTACGTACGTGT  
ACGTACGTGTACGCACGTGTACGTACGTGTACGCACGTGTACGTACGTGTACGCACGTGTAC  
GCACGTGTACGCACGTGTACGTACGTGTACGTACGTGTACGTACGTGTACGTACGTGTACGC  
ACGTGTACGCACGTGTACGCACGTGTACGCACGTGTACGCACGTGTACGCACGTGTACGTAC  
GTGTACGCGTACGTATTTTAGATACTAAGTTAGCTTAGACAAACCCCCCTTACCCCCCGTAA  
CTTCAAGAAGCTTACATATACTTATGGATGTCCTGCCAAACCCCAAAAACAAGACTAAATAT  
ATGCGCAAACATGAAGTCACTTACACCTAAACCCATATAATTAAGCTAACCCCCCAGCCAAT  
GTTGCAACAACACTACGGACATGGGACTCTAAATTTTAATTTATCTATAGATATTTTTCTTTTAC  
TGTGTCTCCCCAGCATTGATTTTTTAATTATCATTATTCCACACCACCAATTTCCATTGAGCTA  
TTTCACATGAGTTCCAAATCAATTATGTTTCATGTAGCTTAACGAATAAAGCAAGGTACTGAA  
AATGCCTAGATGGGTCACGCTACCCCATAGACATAAAGGTTTGGTCTAGCCTTCCTATTAG  
CCATTAACAAGATTACACATGTAAGTCTCCACGCTCCAGTGAAAATGCCCCTTAAGTCCTCT  
TAGACGACCTAAAGGAGCGGGTATCAAGCACACCTTATGGTAGCTCACAACGCCTTGCTTAG  
CCACACCCCCACGGGAAACAGCAGTGATAAAAATTAAGCTATGAACGAAAGTTCGACTAAG  
CTATGTTAATACTAGGGTTGGTAAATCTCGTGCCAGCCACCGCGGTCATACGATTAACTCGA  
GTTAATAGGCCTACGGCGTAAAGCGTGTAAAAGAAAAAATCTCCTCTACTAAAGTTAAAGT



ATGATTAAGCTGTAAAAAGCTACCATTAATACTAAAATAAACTACGAAAGTGACTTTAAAT  
TTCTGATTACACGATAGCTAGGGCCCAAAGTGGGATTAGATACCCCACTATGCCTAGCTCTA  
AACATAGATATTTTACTAAACAAAAGTATTCGCCAGAGAACTACTAGCAACAGCTTAAAGT  
CAAAGGACTTGCGGTGCTTTATATCCCCCTAGAGGAGCCTGTTCTGTAATCGATAAACCCC  
GATAGACCTCACCATCCCTTGCTAATTCAGTTTATATACCGCCATCTTCAGCAAACCCCTTAA  
AGGAAAAAAGTAAGCATAACTACCCTACATAAAAAAGTTAGGTCAAGGTGTAACCTATGG  
GCTGGGAAGAAATGGGCTACATTTTCTATTCAAGAACAACCTTCTACGAAAACCTTTTATGAAA  
CTAAAAGCTAAAGGCGGATTTAGTAGTAAATTAAGAATAGAGAGCTTAATTGAACAGGGCA  
ATGAAGCACGCACACACCGCCCGTCACCCTCCTCGAGTGATATAATTTAATTATAACCTATT  
TAAACTAAGCAAAGCATAAGAGGAGACAAGTCGTAACAAGGTAAGCATACTGGAAAGTGTG  
CTTGGATGAGCCAAAGTGTAGCTTAAACAAAGCGTCTGGCTTACATCCAGAAGATTTTCATTA  
ATATATGACTACTTTGAACCCAAAGCTAGCCCAAGCAACAATGACTAGTAAAACCATTATGA  
AACATTCAAACAAAACATTTAGTAGCATGACTAGAGTATAGGAGATAGAAATTTTAACTGG  
AGCTATAGAGAGAGTACCGCAAGGGAATGATGAAAGATTACCTAAAGTGATAAACAGCAAA  
GATTGCCCTTCTACCTTTTGTATAATGAGTTAGCTAGAAATAACTTAACAAAGAGAACTTA  
AGCTAAGTCCCCGAAACCAGACGAGCTACCTATGAACAATCCACTGGGATGAACTCATCTA  
TGTTGCAAAATAGTGAGAAGATCCATAGGTAGAGGTGAAAGGCCTAACGAGCCTGGTGATA  
GCTGGTTGCCGAGAATAGAATTTTAGTTTCGACTTTAAACCTGCCTACAAAACCTAATAATTCT  
AATGCAGATTTAAATATATTCTAAAAAGGTACAGCTTTTTAGAGTTAAGGATACAGCCTTA  
CTTAGAGAGTAAATATTTATATAAGCCATAGTAGGCCTAGAGGCAGCCATCAATTAAGAAA  
GCGTTAAAGCTCAACATCTCTATTAACCTAATACCAAGAATATTTAATCAACTCCTAATGTAT  
TACTGGGTCAATCTATTTAAATATAGAAGTGATAATGCTAATATGAGTAACAAGAAATATTT  
CTCCCATGCATAAGCTTATAACAGCAACGGATAACCACTGATAGTTAACAACAACATAGAA  
ATAACCTAATGATAAAACACCTATTAAATCAATTGTTAGTCCAACACAGGCATGCAATCAGG  
GAAAGATTAAAGAAGTGAAAGGAACTCGGCAAAATACAAACCCCGCCTGTTTACCAAAAAC  
ATCACCTCCAGCATTTCAGTATTGGAGGCACTGCCTGCCCCGGTGACATCAGTTAAACGGCC  
GCGGTATTCTGACCGTGCAAAGGTAGCATAATCATTGTCTCTAAATAAGGACTTGTATGA  
ATGGCCACACGAGGGTTTAACTGTCTCTTACTTCCAATCAGTGAAATTGACCTCCCCGTGAA  
GAGGCGGGGATAAGACAATAAGACGAGAAGACCCTATGGAGCTTTAATTAACCTAATTCAAA  
AAGAACTACTAACGACCCAACAGGAATAATATATCTCTTTTATGAATTAGCAATTTAGGTT  
GGGGCGACCTCGGAGGACAAAATAGCCTCCGAGTGATTATAAATCTAGACTTACCAGTCAA  
AATGCTTAATCACTTATTGATCCAAAAATTCTTTTATGATCAACGGAACAAGTTACCCTAGGGA  
TAACAGCGCAATCCTATCCGAGAGTCCATATCGACAATAGGGTTTACGACCTCGATGTTGGA  
TCAGGACATCCTAATGGTGCAGCAGCTATTAAAGGTTTCGTTTGTTCACGATTAAAGTCCTA  
CGTGATCTGAGTTCAGACCGGAGCAATCCAGGTCGGTTTCTATCTATTCAAATAATTTCTCCC  
AGTACGAAAGGACAAGAGAAATAAGGCCTACTTCTCTGAAGCGCCTTAAGACCAATAGATG  
AATTTATCTAAATCTAGTAAATCTAACTCCAATATTGCCCAAGAGACAGGGCTTTGTTAGGG  
TGGCAGAGCCCGTAATTGTGCAAACTTAACTCTTGTGTCCAGAGGTTCAATTCCTCTCC  
CTAGCATATGTTTATAATTAACATCTTCTCACTAATTGTACCTATTCTTCTTGCTGTAGCCTTT  
CTGACTCTAGTAGAACGAAAAGTACTAGGCTACATACAGCTTCGAAAAGGCCCAAATATTGT  
AGGTCCATATGGTCTCCTACAACCAATCGCAGATGCCGTAAGTCTTTACTAAAGAACCTT  
TACGACCACTTACGTATCCATAACTATATTTATTATAGCCCCTATTCTAGCCTTAACACTAG  
CTCTGACCATGTGAGTCCCCTTACCAATACCGCACCCCTTATTAACATAAACCTAGGAGTA  
CTATTCATACTAGCTATATCAAGTCTAGCTGTATACTCTATTCTCTGATCTGGATGAGCCTCA  
AACTCAAAATATGCCCTAATTGGAGCCCTACGAGCCGTAGCTCAAACGATCTCATATGAAGT  
CACACTAGCCATTATCCTTTTATCCGTTCTACTAATAAATGGCTCATTTACGCTATCCACGCT  
AATCATTACCCAAGAACATCTTTGATTAATCTTCCCTGCATGACCACTAGCTATAATATGATT  
TATTTCTACCCTAGCAGAAACAAATCGAGCCCCCTTTGACCTAACAGAAGGAGAATCAGAAC  
TAGTCTCTGGGTTTAAATGTCGAATATGCAGCAGGTCCATTTGCCCTGTTCTTCTAGCAGAA  
ATGCCAACATCATCATAATAAATGCTCTTACAACCTATTCTATTCTTCGGAGCATTTTCACAGCC  
CCTACATACCAGAATTATACATTGTTAATTTTACCGTAAAACTTTACTCCTCACAATCTCTT

TTCTATGAATCCGAGCATCATATCCTCGATTCCGATACGACCAACTAATACACCTACTATGA  
AAAACTTTCTACCTCTCACACTAGCTCTATGTATATGACATGTAACCTACCTATTATTACA  
GCAAGCATTCCACCTCAAACGTAAGAAATATGTCTGACAAAAGAATTACTTTGATAGAGTAA  
GCCATAGGGGTTTAAGTCCCCTTATTTCTAGAATCATAGGAATCGAACCTAATCTTAAGAAC  
TCAAAAATCTTCGTGCTACCTAACTACACCATATCCTAAAGTAAGGTCAGCTAAATAAGCTA  
TCGGGCCCATAACCCCGAAAATGTTGGTTTATCCCCTTCCCATACTAATAAAACCAGCCATCCT  
TATTACCATTACATCCACCGTTGTCTTAGGAACATAAATTGTTCTATTTAGCTCCCCTGATT  
CATAATCTGAGTTGGCTTTGAAATAAATATACTAGCCATTATCCCAATTCTAATAAAAAAAT  
ATAACCCACGAGCCATAGAAGCTTCCACAAAATATTTTCTAACACAAGCTACAGCATCCATG  
CTTCTAATGCTAAGCATCATCATCAATCTACTATGCTCAGGACACTGGACAGTTTCAACAATT  
CCCAATCCAGTAGCATCTACCATAATTACTATTGCTCTAACAATAAAACTTGGCCTATCACC  
ATTTCACTTTTGAGTCCCAGAAGTTACACAAGGCATTTCCCTTATCTTCAGGAATAATCCTATT  
AACATGACAAAAAATTGCACCTTTATCCATTCTATACCAAATTTACCCTCCGTTAACTCAA  
ATCTCTTACTAATAATAGCTATCACATCCATACTGGTAGGAGGCTGAGGAGGATTAAATCAA  
ACCCAATCCGAAAAATCTTGGCATACTCCTCAATTACCCATATAGGCTGAATGGCTGCTAT  
TATAGTATATAATCCTACCCTAGCAATTCTTAACCTAACAATTTACATCATAATAACTCTAGG  
AACATTTATACTATTCATACATAGCTCATCTACAACAACACTATCACTATCTTATACATGAAA  
TAAATTCCCATTAAATAGCCCCACTAATCTTAATACTTATACTATCACTAGGAGGCCTCCCTCC  
TCTCTCAGGCTTTATCCCCAAATGAATAATTATTCAAGAATTAACAAAAAACGACATAATTA  
TTATACCTACACTTATAGCCATTACAGCCCTACTAAACCTATATTTTTACACACGCCTAACAT  
ATACTACAGCACTAACTATATTTCCCGCAACAAATAATATAAAAAATAAAATGACAATTTCGAA  
ACCACAAAAAAGACAACCTCTCCTAGCCCCCTAATCGTGACATCAACTATACTACTACCCT  
AACCCCAATACTAGCAGCTCTTGATTAGAGATTTAGGCTAAACAGACCAAGGGCCTTCAAAG  
CCTCAAGTAAGTGAAAATCCACTTAATCTCTGCAATATTTAAGGACTGCAAGAATCTACCTC  
ACATCAACTGAACGCAAAACAATCGCTTTAATTAAGCTAAGCCCTTCTAGATCGGTGGGCTT  
TTACCCCAACAAAACCTTTAGTTAACAGCTAAAAACCCTAGACAACCTGGCTTCAATCTACTTCT  
CCCGCCGCGTAGGAAAAAAGGCGGGGAGAAGCCCCGGCAGAATTGAAGCTGCTTCTTTGAA  
TTTGCAATTCAATATGATTACTCACACAGAGCCTGGTAAAAAGAGGACTTAACCCCATTC  
TTAGATTTACAGTCTAGTGCTTTTATCAGCCATTTTACCTATGTTTCATTAACCGATGACTGTTT  
TCCACCAACCACAAAGATATTGGCACTCTTTATCTTCTGTTTGGCGCATGAGCTGGTATAACG  
GGCACTGCTCTTAGCCTTCTAATCCGTGCTGAATTAGGTCAGCCTGGAGCTCTGTTAGGAGA  
TGACCAAATTTACAATGTAGTTGTAACCTGCCCACGCATTTCGTAATAATCTTCTTTATAGTTAT  
GCCTATTATGATCGGAGGCTTTGGAAATTGACTAGTACCTTTGATAATTGGTGCGCCTGATAT  
AGCATTTCCCCGAATAAAACAATATGAGTTTCTGATTACTACCTCCATCCTTTCTTCTCCTTCTG  
GCTTCTTCCATAGTAGAAGCAGGCGCAGGGACTGGATGAACGTATACCTCCTCTAGCAGG  
TAACTTAGCCCATGCAGGAGCATCAGTAGACCTAACAATCTTTTCTCTACATCTGGCAGGGG  
TTTCTTCTATTTTAGGGGCTATTAACCTTTATTACCACTATCATCAACATGAAACCCCTGCAA  
TATCTCAATATCAAACCTCCCCTATTCGTGTGATCAGTACTTATCACAGCAGTACTTCTCCTTC  
TATCTTTACCAGTCTTAGCAGCTGGAATTACTATACTACTTACAGATCGAAATCTCAATACTA  
CTTTCTTCGACCCGGCCGGAGGAGGGGATCCCATTTCTATATCAACATCTATTTTGATTCTTTG  
GCCATCCTGAAGTCTATATTCTAATCCTCCCTGGGTTTGGGAATAATTTACACATTGTCACAT  
ACTATTCAGGAAAGAAAGAGCCCTTTGGTTATATGGGAATAGTGTGGGCAATAATGTCAATT  
GGATTCTTAGGATTTATTGTATGGGCCCATCATATATTTACTGTAGGCATAGATGTTGATACA  
CGAGCCTATTTTACCTCGGCCACTATAATTATTGCAATCCCGACAGGAGTTAAAGTATTTCAG  
CTGACTAGCTACCCTGCATGGAGGAAATATTAAGTGATCCCCTGCCATAATGTGAGCCCTAG  
GTTTCATTTTCTATTTACAGTAGGGGGTCTTACAGGCATTGTTCTAGCTAACTCATCTCTGG  
ACATTGTCTCCATGACACATACTACGTAGTAGCACACTTCCACTATGTACTATCAATAGGG  
GCCGTGTTTCGCTATTATAGGAGGCTTCGTCCATTGATTCCCATATTTTTCGGGCTATACACTT  
AATAATACATGAGCAAAAATTCACTTCGTAATTATATTTGTTGGAGTCAATATAACATTCTTC  
CCCCAGCACTTCCTAGGTCTATCAGGTATGCCTCGACGATATTCTGATTATCCAGACGCCTAT  
ACAGCATGAAACACAGTGTCTTCAATGGGTTCATTCAATTTCACTAACAGCAGTTATGTTAAT

AATTTTCATAATTTGAGAAGCCTTCGCATCTAAACGAGAAGTGGCAGTGATTGAGCTTACTA  
CAACTAATATTGAATGGCTCCACGGATGCCCTCCCCCATACCATAACATTCGAAGAGCCCGCC  
CACGTCATACTGAAATAAGAAAGGAAGGAATCGAACCCTCTAGAATTGGTTTTCAAGCCAGC  
ATCATAAACCCTATGTCTCTCTCAATAAAAGAGGTATTAGTAAAAATTACATAAACTTTGTCAA  
AGTTGAATTATAGGTGAAAATCCTTTATATCTCTATGGCGCATCCCTTTCAAACAGGCCTTCA  
AGATGCAACTTCCCCCATCATGGAAGAACTCCTACACTTCCATGATCATACTAATAATTG  
TATTCTTAATTAGTTCCTTAGTTCCTATATCATTTCGAATTATATTAACACTACTAAATTAACACA  
TACAAATACAATAGACGCACAAGAAGTGGAGACAGTATGAACTATTCTACCAGCTATCATCT  
TAATTATAATTGCACTTCCATCACTACGAATTCTTTATATGATAGATGAAATTAATAACCCAT  
CATTAACTGTAAAGACTATGGGGCATCAATGATACTGAAGCTATGAGTATACAGATTATGAA  
GACTTGAGCTTCGATTCTTATATAACCCCAACACAAGAATTAAGCCCGGAGAGCTGCGATT  
ACTAGAGGTAGATAATCGAGTAGTACTACCCATAGAAATAACAATTCGCATATTAATTTCT  
CAGAAGATGTGCTACATTCGTGAGCTGTCCCATCTCTAGGACTAAAACTGATGCAATCCCG  
GGGCGATTAAATCAAACAACCTCTTATGGCCATGCGACCAGGACTATATTATGGCCAATGCTC  
AGAGATTTGCGGTTCTAATCATAGCTTTATACCCATTGTACTTGAAATAGTTCGCTGTCTTA  
CTTTGAAAAATGATCCGCTTCAATACTATAAAATCATTAAAGAAGCTTTATAGCGTTAACCTTT  
TAAGTTAAAGACTGAGAGTGCAAGTCTCTCCTTAATGGAAATGCCACAATTAGACACATCCA  
CATGATTTATTACAATCCTATCCATGATCTTAACACTATTTATTATATTTTCAGTTAAAAGTCT  
CAAAACACAACCTATCCTGAGTTTCCTGAATTA AAAACAACCCCACTATCAAAAAACCTATG  
CCTTGAGAAGAAAAATGAACGAAAATCTGTTTCGCCTCTTTTACTACCCCAATGATAATAGGA  
GTACCAATTGTGGTTCTGATTATTATTTTCCCAAGTATCTTATTTCCCTCACCTAATCGATTAA  
TCAATAACCGCCTAGCTACTGTCCAACAATGATTAATTCAATTAGTATCTAAGCATATACTGT  
CTATTCACAATTATAAAGGACAAACCTGAGCGCTAATACTAATGTCATTAATTTTATTATTG  
GCTCAACTAACCTTTTAGGCCTATTACCACATTCATTACACCTACTACACAACCTATCAATAA  
ATTTAGGAATGGCCATTCTCTGTGAGCAGGTACAGTAGTTATAGGATTCGACACAAAACCT  
AAGGCATCTCTGGCCCACTTTCTACCCCAAGGAACACCTCTTCCTCTGATCCCAATGTTAGTA  
ATTATCGAGACAATTAGTCTGTTTATTCAACCTGTGGCCCTAGCTGTACGACTGACCGCTAAT  
ATTACTGCAGGCCATCTACTTATTCAATTAATCGGAGGGGCTACCCTAGTTTTAATAAACATT  
AACCTGTAAACAGCCCTAATTACCTTTATTATTCTTATTCTACTTACTATTCTCGAATTAGCTG  
TAGCTCTTATCCAAGCCTATGTTTTACCCCTACTAGTTAGTCTATACTTACATGATAATACCT  
AATGATCCACCAACACATGCATATCATATAGTTAATCCAAGCCCATGGCCACTTACAGGAG  
CTCTCTCGGCTCTTCTTATAACATCAGGACTAATTATATGATTTCACTTTAACTCGGTATACTT  
ACTAATACTAGGCCTCACCAACATACTTACCATGTACCAATGATGACGAGATATCGTCC  
GGGAAAGTACCTTCCAAGGCCATCACACCCCAATCGTCCAAAAAGGACTACGATATGGAAT  
AGTCTTATTTATTGTATCAGAAGTATTTTTCTTCGCGGGATTCTTTTGGGCCTTCTACCACTCA  
AGCCTAGCACCTACTCCTGAATTAGGAGCATGTTGACCACCTACAGGTATCATCCCCTTAAA  
TCCGCTAGAAGTTCCACTACTTAACACCTCTGTACTTCTAGCATCTGGGGTATCTATCACTTG  
AGCTCATCATAGTCTAATAGAAGGAGACCGCAAACATATGCTCCAAGCCCTATTTATTACTA  
TTTCACTAGGAGTTTATTTTCACTTCTACAAGCCTCAGAATACTATGAGACATCCTTTACTA  
TTTCAGATGGAGTGATGGTTCAACCTTCTTTATAGCAACTGGATTTTCATGGGCTTCATGTAA  
TTATTGGTTCAACTTTTCTTACTGTGTGTTTTCTACGACAACCTGCACTTTCACTTTACATCCAA  
CCATCACTTTGGCTTTGAAGCGGCAGCATGATACTGACACTTCGTAGACGTTGTATGGCTTTT  
CCTTTATGTTTCTATTTACTGATGAGGATCCTACTTCTTTAGTATTAACCTAGTACGATTGACCT  
CCAATCAATAGGCTCTGGTACAAGCCAGAAAGAAGTAATAAACCTAATTCTAGCACTTCTAA  
CCAACGTATTATTAGCCTCTCTGCTCGTTCTTATTGCATTCTGACTGCCACAACCTAAATATCT  
ATGCAGAAAAAGTAAGTCCTTATGAATGTGGATTTGATCCTATAGGATCAGCACGCCTTCCT  
TTCTCTATAAAATTTTTTCTAGTAGCTATTACATTCTTTTATTTCGACTTAGAAATTGCTCTAC  
TCCTCCCGCTTCCTTGAGCATTACAGACTAACAACCTTAATAACTATACTTATTATAGCTCTAT  
TACTCATTTCCCTATTAGCCGCAAGCCTAGCTTATGAGTGAACCGAAAAGGGGCTAGAATGG  
GCCGAATATGATAATTAGTTTAAACTAAAATAAGTGATTTGCACTCACTAGATTATGACTAA  
CATCATAATTATCAAATGTCTGTGGTCTATATTAATCTCTTTCTAGCCTTTACTATATCCTTAA

TAGGGCTACTCATCTATCGATCCCATTTAATATCCTCCCTATTATGCTTAGAAGGCATGATGC  
TGTCACTATTTGTTATACTAGCAGTAACAATCCTAAGTAACCACTTCACACTAGCCAGTATG  
ACTCCAATCATTCTATTAGTATTCGCTGCCTGTGAAGCAGCGTTGGGGCTTTCTCTGCTAGTA  
ATAGTCTCTAATACCTATGGAAGTACTACGTACAAAATCTTAACCTCCTACAATGCTAAAA  
ATTATCCTCCCTACCATAATACTAGTACCCCTTACATGAATATCAAAGCCTAACATAATCTGA  
ATTAATACAACAACCTATAGTCTACTCATCAGCCTTATTAGTCTGACATATCTCAATCAACTC  
AGTGATAATAGTCTAAACTTCTCATTAAACATTCTTTACCGACTCCCTATCAGCCCCCTGTTA  
GTTCTCACAACATGACTACTGCCCTTAATACTTATAGCTAGTCAATTTACCTGTCAAAAGAG  
ACCTGACCCGGAATAATTATATATCACAATACTAATTCTCCTGCAACTATTCTTAATTATA  
ACATTTTCTGCTACTGAGTTAATCATATTCTATATTTTATTTGAAGCTACCTGGTACCGACTT  
TAGTTATCATTACTCGATGAGGAAACCAAACGAAACGACTAAACGCGGGCCTCTATTTTTTA  
TTCTACACCTTAGTAGGATCCTTGCCCTTACTAGTTGCACTGTTATATGCCCAAAACAGCTTA  
GGATCACTAAATTTTCTCATAGTACAGTACTGAACTCAGCCCTTGCCAAATTCCTGATCTAAC  
ATTTTCATGTGGCTGGCATGTATAATAGCATTTCATAGTAAAAATACCGCTATATGGCTTACA  
CCTATGACTACCTAAAGCACATGTAGAAGCTCCTATTGCAGGATCCATAGTACTTGCTGCAG  
TACTTCTAAAACTAGGGGGATACGGTATAATGCGGATTACAACAATACTCAACCCTCTAACA  
AATTTTATAGCCTACCCCTTCATAATGCTCTCACTATGAGGAATAATCATAACAAGTTCTATT  
TGTTTACGCCAGACAGACCTAAAGTCCCTAATTGCATACTCCTCTGTAGTCACATAGCCCTA  
GTCATTGTAGCAATTCTAATCCAATCCCCATGAAGCTACATAGGAGCTACTGCTCTAATAAT  
CGCCCATGGGTAAACATCTTCTATGCTATTCTGTCTTGCAAACCTCTAACTACGAGCGAACCCA  
TAGCCGAACCTATAATTCTCGCACGGGGCTTGCAAACGCTTCTTCCACTTATAGCAGCTTGAT  
GACTATTAGCAGGCCTAACTAACTTAGCTCTTCCTCCTACAATTAATCTGATTGGGGAACTGT  
TTGTAGTGATAGCCACATTTTCATGATCCAATATTACCATTCTCTTAATAGGAGTTAACATTA  
CCATTACTGCTCTCTACTCTCTATATATACTAATTTCTACACAGCGAGGCAAGTATACAGACC  
ACATCAAAAATATTAAGCCATCTTATACACGAGAAAAATGCCTTAATAGCCTTACATTTACTA  
CCCCTTTTACTTCTATCTCTTAACCCTAAAGTAGTTCTAGGCTTTATTTACTGTAAATATAGTT  
TAACAAAAACATTAGATTGTGAATCTAGTAATAAAAGCTTAAATCTTTTTATTTACCGAAAA  
AGCATGCAAGAACTGCTAATTCATGCACCCATGCATAAAATCATGGCTTTTTCAACTTTTAG  
GGGATAGAAGTAATCCATTGGTCTTAGGAGCCAAAAAATTGGTGCAACTCCAAATAAAAGT  
AATTAACCTACTTACCTCCTTCACCATTACAACCCTATTTATATTAATCATGCCCATATCCT  
AACCTGTACCCCAAGCATATGAAAATAAACTTTACCCGCAATATGTAAAAACCACAGTCTCTT  
ATGCCTTCACAATTAGCATAATTCCCATAGTAATATTCATCCACTCCGGACAAGAAGCAATC  
ATCTCAAACCTGACACTGAATAACCATCCAAACCCTAAAACCTCAGTCTAAGCTTCAAATTAGA  
TTACTTTTCAATAATCTTCGTACCAGTGGCCCTATTCGTACATGGTCAATTATAGAATTCTC  
TATATGATATATACACGCAGATCCTAACATTAACCGATTCTTTAAATATCTACTTATATTCCT  
CGTCACGATAATAATTCTAGTAACCGCAAATAATCTATTTTCAGCTATTTATCGGGCTGAGAGG  
GAGTAGGAATCATATCATTCTCCTCATTGGATGATGATATGGACGAACAGATGCTAATACG  
GCTGCCCTACAAGCAGTACTATACAACCGCATTGGAGATGTTGGTTTTATCATGGCCATAGC  
TTGATTCTTACTCAATACAAATGCATGGGACTTCCAACAAATCTTTATAATCGAGCATAAAA  
ACCTCAATATTCCACTGGCAGGACTACTTCTAGCAGCTACCGGAAAGTCTGCCCAATTTGGA  
CTTCACCCATGACTCCCATCAGCCATAGAAGGCCCCACTCCTGTCTCAGCACTACTTCACTCT  
AGCACAATAGTAGTAGCAGGCGTATTTCTTCTAGTCCGATTTACCCCTTAATAGAACATAA  
CAAGACAATTCAAACGGTTACCCTATGCTTAGGGGCAATAACAACCTTGTTTACAGCAATCT  
GCGCCCTTACCCAAAATGATATCAAAAAAATTATTGCCTTCTCCACCTCGAGCCAACCTAGGA  
CTAATAATTGTAACAATTGGTATTAATCAGCCTCATCTGGCCTTTCTCCATATCTGCACGCAC  
GCATTCTTCAAGGCCGTGCTATTTCTATGCTCCGGATCTATTATTCATAGTCTAAACAACGAA  
CAAGATATTGCAAAGATAGGAGGGCTATTTAAAAGTCTACCATTTACCACTACTGCTCTAAT  
CATCGGAACCTTAGCACTTACAGGAATGCCCTTCTTAACAGGATTTTACTCCAAGACTTAA  
TTATTGAAACCGCCAATACGTCATACACCAACGCCTGAGCCTTACTAACAACCCTTATCGCC  
ACATCCATAACTGCCGCCTACAGTACTCGAATTGTATTTTTTACACTTCTAGGACAACCTCGC  
TATAGTCCCATTATCACCATTAACGAGAATAACCAGTTCCTGACTAACTCTGTCAAACGATT

TG

>SRR6109211 (circular) ReOrganized

ATACTATAAAATCCAACCTCTCATTTTATTCACCTTCATACATGCTATTACACACTCTGTGCCATC  
 ATAGTATGTTTTCATACATCCTCCCTTCTTTCACACCCTATGTATATCGTACATTAATGGTGTA  
 CCCCCCCTCCCCCTATGTATATCGTGCATTAATGGCGTGCCCCATGCATATAAGCATGTAC  
 ATACTGTGCTTGGCTTTACATGAGGATACTCATTACAAGAACTTATTTCAAGCGATAGTCTAT  
 GAGCATGTATTTCACTTAGTCCAAGAGCTTGATCACCAAGCCTCGAGAAACCAGCAATCCTT  
 GCGAGTACGTGTACCTCTTCTCGCTCCGGGGCCATAAATTTGTGGGGGTTTCTATACTGAAACT  
 ATACCTGGCATCTGGTTCTTACCTCAGGGCCATGTTAGCGTCAACTCAATCCTACTAACCCTT  
 CAAATGGGACATCTCGATGGACTAATGACTAATCAGCCCATGATCACACATAACTGTGGTGT  
 CATGCATTTGGTATTTTTTAATTTTAGGGGGGGAAGTTGCTATGACTCAGCTATGACCGTAAA  
 GGTCTCGTCGCAGTCAAATCAGCTGTAGCTGGGCTTATTCATCTTTCGAGGCTCCTCATGGAT  
 ACCCATAAGGTGCAATTCAGTCAATGGTCACAGGACATAACACTATAGATCACCCGGACTG  
 GCGTTACGTGTACGTACGTGTACGTACGTGTACGTACGTGTACGCACGTGTACGTACGTGTA

CGCACGTGTACGTACGTGTACGCACGTGTACGCACGTGTACGCACGTGTACGCACGTGTACG  
CACGTGTACGTACGTGTACGCGTACGTATTTTAGATACTAAGTTAGCTTAGACAAACCCCC  
TTACCCCCCGTAACTTCAAGAAGCTTACATATACTTATGGATGTCCTGCCAAACCCCCAAAA  
CAAGACTAAATATATGCGCAAACATGAAGTCACTTACACCTAAACCCATATAATTAAGCTAA  
CCCCCAGCCAATGTTGCAACAACACTACGGACATGGGACTCTAAATTTTAATTTATCTATAGA  
TATTTTCTTTTACTGTGTCTCCCCAGCATTGATTTTTTAATTATCATTATTCCACACCACCAA  
TTTCCATTGAGCTATTTACATGAGTTCCAAATCAATTATGTTTCATGTAGCTTAACGAATAAA  
GCAAGGTACTGAAAATGCCTAGATGGGTCACGCTACCCCATAGACATAAAGGTTTGGTCCTA  
GCCTTCCTATTAGCCATTAACAAGATTACACATGTAAGTCTCCACGCTCCAGTGAAAATGCC  
CCTTAAGTCCTCTTAGACGACCTAAAGGAGCGGGTATCAAGCACACCTTATGGTAGCTCACA  
ACGCCTTGCTTAGCCACACCCCCACGGGAAACAGCAGTGATAAAAATTAAGCTATGAACGA  
AAGTTCGACTAAGCTATGTTAATACTAGGGTTGGTAAATCTCGTGCCAGCCACCGCGGTCTAT  
ACGATTAACCTCGAGTTAATAGGCCTACGGCGTAAAGCGTGTAAAAGAAAAAATCTCCTCTAC  
TAAAGTTAAAGTATGATTAAGCTGTAAAAAGCTACCATTAATACTAAAATAAACTACGAAA  
GTGACTTTAAAATTTCTGATTACACGATAGCTAGGGCCCCAACTGGGATTAGATACCCCACT  
ATGCCTAGCTCTAAACATAGATATTTTACTAAACAAAACCTATTCGCCAGAGAACTACTAGCA  
ACAGCTTAAAACTCAAAGGACTTGGCGGTGCTTTATATCCCCCTAGAGGAGCCTGTTCTGTA  
ATCGATAAACCCCGATAGACCTCACCATCCCTTGCTAATTCAGTTTATATACCGCCATCTTCA  
GCAAACCCCTTAAAAGGAAAAAAGTAAGCATAACTACCCTACATAAAAAAGTTAGGTCAAG  
GTGTAACCTATGGGCTGGGAAGAAATGGGCTACATTTTCTATTCAAGAACAACCTTCTACGAA  
AACTTTTATGAACTAAAAGCTAAAGGCGGATTTAGTAGTAAATTAAGAATAGAGAGCTTA  
ATTGAACAGGGCAATGAAGCACGCACACACCGCCGTCACCCTCCTCGAGTGATATAATTTA  
ATTATAACCTATTTAACTAAGCAAAGCATAAGAGGAGACAAGTCGTAACAAGGTAAGCAT  
ACTGGAAAGTGTGCTTGGATGAGCCAAAGTGTAGCTTAAACAAAGCGTCTGGCTTACATCCA  
GAAGATTTTATTATATGACTACTTTGAACCCAAAGCTAGCCCAAGCAACAATGACTAGT  
AAAACCATTAATGAAACATTCAAACAAAACATTTAGTAGCATGACTAGAGTATAGGAGATAG  
AAATTTTTAACTGGAGCTATAGAGAGAGTACCGCAAGGGAATGATGAAAGATTACCTAAAG  
TGATAAACAGCAAAGATTGCCCCTTCTACCTTTTGTATAATGAGTTAGCTAGAAATAACTTA  
ACAAAGAGAACTTAAGCTAAGTCCCCGAAACCAGACGAGCTACCTATGAACAATCCACTG  
GGATGAACTCATCTATGTTGCAAAATAGTGAGAAGATCCATAGGTAGAGGTGAAAGGCCTA  
ACGAGCCTGGTGATAGCTGGTTGCCCAGAATAGAATTTAGTTGACTTTAAACCTGCCTAC  
AAAATAATAATTCTAATGCAGATTTAAAATATATTCTAAAAAGGTACAGCTTTTATAGAGTT  
AAGGATACAGCCTTACTTAGAGAGTAAATATTTATATAAGCCATAGTAGGCCTAGAGGCAG  
CCATCAATTAAGAAAGCGTTAAAGCTCAACATCTCTATTAACCTAATACCAAGAATATTTAA  
TCAACTCCTAATGTATTACTGGGTCAATCTATTTAAATATAGAAGTGATAATGCTAATATGA  
GTAACAAGAAATATTTCTCCCATGCATAAGCTTATAACAGCAACGGATAACCACTGATAGTT  
AACAACAACATAGAAATAACCTAATGATAAAACACCTATTAAATCAATTGTTAGTCCAACAC  
AGGCATGCAATCAGGGAAAGATTAAAAGAAGTGAAAGGAACTCGGCAAATACAAACCCCG  
CCTGTTTACCAAAAACATCACCTCCAGCATTTCAGTATTGGAGGCACTGCCTGCCCCGGTGA  
CATCAGTTAAACGGCCGCGGTATTCTGACCGTGCAAAGGTAGCATAATCATTGTTCTCTAA  
ATAAGGACTTGTATGAATGGCCACACGAGGGTTTAACTGTCTCTTACTTCCAATCAGTGAAA  
TTGACCTCCCCGTGAAGAGGCGGGGATAAGACAATAAGACGAGAAGACCCTATGGAGCTTT  
AATTAACCTAATTCAAAAAGAACTACTAACGACCCAACAGGAATAATATATCTCTTTTATGA  
ATTAGCAATTTAGGTTGGGGCGACCTCGGAGGACAAAATAGCCTCCGAGTGATTATAAATCT  
AGACTTACCAGTCAAAATGCTTAATCACTTATTGATCCAAAAATTCTTTTGATCAACGGAAC  
AAGTTACCCTAGGGATAACAGCGCAATCCTATCCGAGAGTCCATATCGACAATAGGGTTTAC  
GACCTCGATGTTGGATCAGGACATCCTAATGGTGCAGCAGCTATTAAAGGTTTCGTTTGTCA  
ACGATTAAGTCCTACGTGATCTGAGTTCAGACCGGAGCAATCCAGGTCGGTTTCTATCTAT  
TCAAATAATTTCTCCAGTACGAAAGGACAAGAGAAATAAGGCCTACTTCTCTGAAGCGCCT  
TAAGACCAATAGATGAATTTATCTAAATCTAGTAAATCTAACTCCAATATTGCCCAAGAGAC  
AGGGCTTTGTTAGGGTGGCAGAGCCCGGTAATTGTGCAAACTTAACTCTTGTGTCCAGAG

GTTCAATTCCTCTCCCTAGCATATGTTTATAATTAACATCTTCTCACTAATTGTACCTATTCTT  
CTTGCTGTAGCCTTTCTGACTCTAGTAGAACGAAAAGTACTAGGCTACATACAGCTTCGAAA  
AGGCCCAAATATTGTAGGTCCATATGGTCTCCTACAACCAATCGCAGATGCCGTAAAACCTCT  
TACTAAAGAACCTTTACGACCACTTACGTCATCCATAACTATATTTATTATAGCCCCCTATTC  
TAGCCTTAACACTAGCTCTGACCATGTGAGTCCCCTTACCAATACCGCACCCCCTTATTAACA  
TAAACCTAGGAGTACTATTTCATACTAGCTATATCAAGTCTAGCTGTATACTCTATTCTCTGAT  
CTGGATGAGCCTCAAACCTCAAATATGCCCTAATTGGAGCCCTACGAGCCGTAGCTCAAACG  
ATCTCATATGAAGTCACACTAGCCATTATCCTTTTATCCGTTCTACTAATAAATGGCTCATTT  
ACGCTATCCACGCTAATCATTACCCAAGAACATCTTTGATTAATCTTCCCTGCATGACCACTA  
GCTATAATATGATTTATTTCTACCCTAGCAGAAACAAATCGAGCCCCCTTTGACCTAACAGA  
AGGAGAATCAGAACTAGTCTCTGGGTTTAATGTGAATATGCAGCAGGTCCATTTGCCCTGT  
TCTTCCTAGCAGAATATGCCAACATCATCATAATAAATGCTCTTACAACCTATTCTATTCTTCG  
GAGCATTTACAGCCCCCTACATACCAGAATTATACATTGTAAATTTTACCGTAAAAACTTTAC  
TCCTCACAATCTCTTTTCTATGAATCCGAGCATCATATCCTCGATTCCGATACGACCAACTAA  
TACACCTACTATGAAAAAACTTTCTACCTCTCACACTAGCTCTATGTATATGACATGTAACCTC  
TACCTATTATTACAGCAAGCATTCCACCTCAAACGTAAGAAATATGTCTGACAAAAGAATTA  
CTTTGATAGAGTAAGCCATAGGGGTTTAAGTCCCCTTATTTCTAGAATCATAGGAATCGAAC  
CTAATCTTAAGAACTCAAAAATCTTCGTGCTACCTAACTACACCATATCCTAAAGTAAGGTC  
AGCTAAATAAGCTATCGGGCCCATACCCCGAAAATGTTGGTTTATCCCCTTCCCATACTAAT  
AAAACCAGCCATCCTTATTACCATTACATCCACCGTTGTCTTAGGAACTATAATTGTTCTATT  
TAGCTCCCCTGATTTCATAATCTGAGTTGGCTTTGAAATAAATATACTAGCCATTATCCCAAT  
TCTAATAAAAAAATATAACCCACGAGCCATAGAAGCTTCCACAAAATATTTTCTAACACAAG  
CTACAGCATCCATGCTTCTAATGCTAAGCATCATCATCAATCTACTATGCTCAGGACACTGG  
ACAGTTTCAACAATTCCCAATCCAGTAGCATCTACCATAATTACTATTGCTCTAACAAATAAA  
ACTTGGCCTATCACCATTTCACCTTTGAGTCCCAGAAGTTACACAAGGCATTTCCCTTATCTTC  
AGGAATAATCCTATTAACATGACAAAAAATTGCACCTTTATCCATTCTATACCAAATTTTAC  
CATCCGTTAACTCAAATCTCTTACTAATAATAGCTATCACATCCATACTGGTAGGAGGCTGA  
GGAGGATTAAATCAAACCCAACTCCGAAAAATCTTGGCATACTCCTCAATTACCCATATAGG  
CTGAATGGCTGCTATTATAGTATATAATCCTACCCTAGCAATTCTTAACCTAACAAATTTACAT  
CATAATAACTCTAGGAACATTTATACTATTTCATACATAGCTCATCTACAACAACACTATCACT  
ATCTTATACATGAAATAAATTCCCATTAATAGCCCCACTAATCTTAATACTTATACTATCACT  
AGGAGGCCTCCCCTCTCTCAGGCTTTATCCCCAAATGAATAATTATTCAAGAATTAACAA  
AAAACGACATAATTATTATACCTACACTTATAGCCATTACAGCCCTACTAAACCTATATTTTT  
ACACACGCCTAACATATACTACAGCACTAACTATATTTCCCGCAACAAATAATATAAAAAATA  
AAATGACAATTTCGAAACCACAAAAAAGACAACCTCTCCTAGCCCCCTCTAATCGTGACATCAAC  
TATACTACTACCACTAACCCCAATACTAGCAGCTCTTGATTAGAGATTTAGGCTAAACAGAC  
CAAGGGCCTTCAAAGCCTCAAGTAAGTGAAAATCCACTTAATCTCTGCAATATTTAAGGACT  
GCAAGAATCTACCTCACATCAACTGAACGCAAAACAATCGCTTTAATTAAGCTAAGCCCTTC  
TAGATCGGTGGGCTTTTACCCCAAAAACTTTAGTTAACAGCTAAAAACCCTAGACAACCTGG  
CTTCAATCTACTTCTCCCGCCGCGTAGGAAAAAAGGCGGGGAGAAGCCCCGGCAGAATTGA  
AGCTGCTTCTTTGAATTTGCAATTCAATATGATTACTCACACAGAGCCTGGTAAAAAGAGG  
ACTTAACCCCCATTCTTAGATTTACAGTCTAGTGCTTTTATCAGCCATTTTACCTATGTTTCATT  
AACCGATGACTGTTTTCCACCAACCACAAAGATATTGGCACTCTTTATCTTCTGTTTGGCGCA  
TGAGCTGGTATAACGGGCACTGCTCTTAGCCTTCTAATCCGTGCTGAATTAGGTCAGCCTGG  
AGCTCTGTTAGGAGATGACCAAATTTACAATGTAGTTGTAAGTGGCCACGCATTCGTAATAA  
TCTTCTTTATAGTTATGCCTATTATGATCGGAGGCTTTGGAAATTGACTAGTACCTTTGATAA  
TTGGTGCGCCTGATATAGCATTTCCCGAATAAACAATATGAGTTTCTGATTACTACCTCCAT  
CCTTTCTTCTCCTTCTGGCTTCTTCCATAGTAGAAGCAGGCGCAGGGACTGGATGAACTGTAT  
ACCTCCTCTAGCAGGTAACCTTAGCCCATGCAGGAGCATCAGTAGACCTAACAAATCTTTTCT  
CTACATCTGGCAGGGGTTTCTTCTATTTTAGGGGCTATTAACCTTATTACCCTATCATCAAC  
ATGAAACCCCCTGCAATATCTCAATATCAAACCTCCCCTATTCTGTGATCAGTACTTATCACA

GCAGTACTTCTCCTTCTATCTTTACCAGTCTTAGCAGCTGGAATTACTATACTACTTACAGAT  
CGAAATCTCAATACTACTTTCTTCGACCCGGCCGGAGGAGGGGATCCCATTCTATATCAACA  
TCTATTTTGATTCTTTGGCCATCCTGAAGTCTATATTCTAATCCTCCCTGGGTTTGGAATAATT  
TCACACATTGTCACATACTATTCAGGAAAGAAAGAGCCCTTTGGTTATATGGGAATAGTGTG  
GGCAATAATGTCAATTGGATTCTTAGGATTTATTGTATGGGCCCATCATATATTTACTGTAGG  
CATAGATGTTGATACACGAGCCTATTTTACCTCGGCCACTATAATTATTGCAATCCCGACAG  
GAGTTAAAGTATTCAGCTGACTAGCTACCCTGCATGGAGGAAATATTAAGTGATCCCCTGCC  
ATAATGTGAGCCCTAGGTTTTCATTTTTCTATTTACAGTAGGGGGTCTTACAGGCATTGTTCTA  
GCTAACTCATCTCTGGACATTGTCCTCCATGACACATACTACGTAGTAGCACACTTCCACTAT  
GTACTATCAATAGGGGGCCGTGTTTCGCTATTATAGGAGGCTTCGTCCATTGATTCCCATTATTT  
TCGGGCTATACACTTAATAATACATGAGCAAAAATTCACTTCGTAATTATATTTGTTGGAGTC  
AATATAACATTCTTCCCCCAGCACTTCCTAGGTCTATCAGGTATGCCCTCGACGATATTCTGAT  
TATCCAGACGCCTATACAGCATGAAACACAGTGTCTTCAATGGGTTCAATTCATTTCACTAAC  
AGCAGTTATGTTAATAATTTTCATAATTTGAGAAGCCTTCGCATCTAAACGAGAAGTGGCAG  
TGATTGAGCTTACTACAATAATATTGAATGGCTCCACGGATGCCCTCCCCCATACCATACA  
TTCGAAGAGCCCCGCCACGTCATACTGAAATAAGAAAGGAAGGAATCGAACCCCTCTAGAAT  
TGGTTTCAAGCCAGCATCATAACCACTATGTCTCTCTCAATAAAGAGGTATTAGTAAAAAATT  
ACATAACTTTGTCAAAGTTGAATTATAGGTGAAAATCCTTTATATCTCTATGGCGCATCCCTT  
TCAAACAGGCCTTCAAGATGCAACTTCCCCCATCATGGAAGAAGTCCCTACACTTCCATGATC  
ATACACTAATAATTGTATTCTTAATTAGTTCCTTAGTTCTCTATATCATTTCATTATATTAAC  
TACTAAATTAACACATACAAATACAATAGACGCACAAGAAGTGGAGACAGTATGAACTATT  
CTACCAGCTATCATCTTAATTATAATTGCACCTCCATCACTACGAATTCTTTATATGATAGAT  
GAAATTAATAACCCATCATTAACTGTAAAGACTATGGGGCATCAATGATACTGAAGCTATGA  
GTATACAGATTATGAAGACTTGAGCTTCGATTCTTATATAACCCCAACACAAGAATTAAGC  
CCGAGAGCTGCGATTACTAGAGGTAGATAATCGAGTAGTACTACCCATAGAAATAACAAT  
TCGCATATTAATTTCTCAGAAAGATGTGCTACATTTCGTGAGCTGTCCCATCTCTAGGACTAAA  
AACTGATGCAATCCCGGGGCGATTAAATCAAACAACTCTTATGGCCATGCGACCAGGACTAT  
ATTATGGCCAATGCTCAGAGATTTGCGGTTCTAATCATAGCTTTATACCCATTGTACTTGAAA  
TAGTTCGCTGTCTTACTTTGAAAAATGATCCGCTTCAATACTATAAAAATCATTAAAGAAGCTT  
TATAGCGTTAACCTTTTAAAGTTAAAGACTGAGAGTGCAAGTCTCTCCTTAATGGAAATGCCA  
CAATTAGACACATCCACATGATTTATTACAATCCTATCCATGATCTTAACACTATTTATTATA  
TTTCAGTTAAAAGTCTCAAAACACAACCTATCCTGAGTTTCCTGAATTA AAAACAACCCCACT  
ATCAAAAAAACCTATGCCTTGAGAAGAAAAATGAACGAAAATCTGTTTCGCCTCTTTTACTAC  
CCCAATGATAATAGGAGTACCAATTGTGGTTCTGATTATTATTTTCCCAAGTATCTTATTTCC  
CTCACCTAATCGATTAATCAATAACCGCCTAGCTACTGTCCAACAATGATTAATTCAATTAGT  
ATCTAAGCATATACTGTCTATTCACAATTATAAAGGACAAACCTGAGCGCTAATACTAATGT  
CATTAAATTTTATTTATTGGCTCAACTAACCTTTTAGGCCTATTACCACATTCATTACACCTAC  
TACACA ACTATCAATAAAATTTAGGAATGGCCATTCTCTGTGAGCAGGTACAGTAGTTATAG  
GATTTTCGACACAAA ACTAAGGCATCTCTGGCCCACTTTCTACCCCAAGGAACACCTCTTCCT  
CTGATCCCAATGTTAGTAATTATCGAGACAATTAGTCTGTTTATTCAACCTGTGGCCCTAGCT  
GTACGACTGACCGCTAATATTACTGCAGGCCATCTACTTATTCATTTAATCGGAGGGGGCTAC  
CCTAGTTTTTAATAAACATTAACCCCTGTAACAGCCCTAATTACCTTTATTATTCTTATTCTACTT  
ACTATTCTCGAATTAGCTGTAGCTCTTATCCAAGCCTATGTTTTACCCCTACTAGTTAGTCTA  
TACTTACATGATAATACCTAATGATCCACCAAACACATGCATATCATATAGTTAATCCAAGC  
CCATGGCCACTTACAGGAGCTCTCTCGGCTCTTCTTATAACATCAGGACTAATTATATGATTT  
CACTTTAACTCGGTATACTTACTAATACTAGGCCTCACCACCAACATACTTACCATGTACCAA  
TGATGACGAGATATCGTCCGGGAAAGTACCTTCCAAGGCCATCACACCCCAATCGTCCAAAA  
AGGACTACGATATGGAATAGTCTTATTTATTGTATCAGAAGTATTTTTCTTCGCGGGATTCTT  
TTGGGCCTTCTACCACTCAAGCCTAGCACCTACTCCTGAATTAGGAGCATGTTGACCACCTA  
CAGGTATCATCCCTTAAATCCGCTAGAAGTCCACTACTTAACACCTCTGTACTTCTAGCAT  
CTGGGGTATCTATCACTTGAGCTCATCATAGTCTAATAGAAGGAGACCGCAAACATATGCTC



CAAGCCCTATTTATTACTATTTCACTAGGAGTTTATTTTACACTTCTACAAGCCTCAGAATAC  
TATGAGACATCCTTTACTATTTTCAGATGGAGTGTATGGTTCAACCTTCTTTATAGCAACTGGA  
TTTCATGGGCTTCATGTAATTATTGGTTCAACTTTTCTTACTGTGTGTTTTCTACGACAACTGC  
ACTTTCACTTTACATCCAACCATCACTTTGGCTTTGAAGCGGCAGCATGATACTGACACTTCG  
TAGACGTTGTATGGCTTTTCCTTTATGTTTCTATTTACTGATGAGGATCCTACTTCTTTAGTAT  
TAACTAGTACGATTGACCTCCAATCAATAGGCTCTGGTACAAGCCAGAAAGAAGTAATAAAA  
CCTAATTCTAGCACTTCTAACCAACGTATTATTAGCCTCTCTGCTCGTTCTTATTGCATTCTGA  
CTGCCACAATAAATATCTATGCAGAAAAAGTAAGTCCTTATGAATGTGGATTTGATCCTAT  
AGGATCAGCACGCCTTCCTTTCTCTATAAAAATTTTTCTAGTAGCTATTACATTCCTTTTATTC  
GACTTAGAAATTGCTCTACTCCTCCCGCTTCCTTGAGCATTACAGACTAACAACCTTAATAACT  
ATACTTATTATAGCTCTATTACTCATTTCCCTATTAGCCGCAAGCCTAGCTTATGAGTGAACC  
GAAAAGGGGCTAGAATGGGCCGAATATGATAATTAGTTTAAACTAAAATAAGTGATTTTCGA  
CTCACTAGATTATGACTAACATCATAATTATCAAATGTCTGTGGTCTATATTAATCTCTTTCT  
AGCCTTTACTATATCCTTAATAGGGCTACTCATCTATCGATCCCATTTAATATCCTCCCTATT  
ATGCTTAGAAGGCATGATGCTGTCACTATTTGTTATACTAGCAGTAACAATCCTAAGTAACC  
ACTTCACACTAGCCAGTATGACTCCAATCATTCTATTAGTATTCGCTGCCTGTGAAGCAGCGT  
TGGGGCTTTCTCTGCTAGTAATAGTCTCTAATACCTATGGAAGTACTACGTACAAAATCTTA  
ACCTCCTACAATGCTAAAAATTATCCTCCCTACCATAATACTAGTACCCCTTACATGAATATC  
AAAGCCTAACATAATCTGAATTAATACAACAACCTATAGTCTACTCATCAGCCTTATTAGTC  
TGACATATCTCAATCAACTCAGTGATAATAGTCTAAACTTCTCATTAACATTCTTTACCGACT  
CCCTATCAGCCCCCTGTTAGTTCTCACAACATGACTACTGCCCTTAATACTTATAGCTAGTC  
AATTTACCTGTCAAAAGAGACCCTGACCCGAAAAAATTATATATCACAATACTAATTCTC  
CTGCAACTATTCTTAATTATAACATTTTCTGCTACTGAGTTAATCATATTCTATATTTTATTTG  
AAGCTACCCTGGTACCGACTTTAGTTATCATTACTCGATGAGGAAACCAAACAGAACGACTA  
AACGCGGGCCTCTATTTTTTATTCTACACCTTAGTAGGATCCTTGCCCTTACTAGTTGCACTG  
TTATATGCCCAAAACAGCTTAGGATCACTAAATTTTCTCATAGTACAGTACTGAACTCAGCC  
CTTGCCAAATTCCTGATCTAACATTTTCATGTGGCTGGCATGTATAATAGCATTTCATAGTAAA  
AATACCGCTATATGGCTTACACCTATGACTACCTAAAGCACATGTAGAAGCTCCTATTGCAG  
GATCCATAGTACTTGCTGCAGTACTTCTAAAAGTACGGGGGATACGGTATAATGCGGATTACA  
ACAATACTCAACCCCTCTAACAAATTTTATAGCCTACCCCTTCATAATGCTCTCACTATGAGGA  
ATAATCATAACAAGTTCTATTTGTTTACGCCAGACAGACCTAAAGTCCCTAATTGCATACTCC  
TCTGTTAGTCACATAGCCCTAGTCATTGTAGCAATTCTAATCCAATCCCCATGAAGCTACATA  
GGAGCTACTGCTCTAATAATCGCCCATGGGTAAACATCTTCTATGCTATTCTGTCTTGCAAAC  
TCTAACTACGAGCGAACCCATAGCCGAACCTATAATTCTCGCACGGGGCTTGCAAACGCTTCT  
TCCACTTATAGCAGCTTGATGACTATTAGCAGGCCTAACTAACTTAGCTCTTCCTCCTACAAT  
TAATCTGATTGGGGAACGTGTTTGTAGTGATAGCCACATTTTCATGATCCAATATTACCATTCT  
CTTAATAGGAGTTAACATTACCATTACTGCTCTCTACTCTCTATATATACTAATTTCTACACA  
GCGAGGCAAGTATACAGACCACATCAAAAATATTAAGCCATCTTATACACGAGAAAAATGCC  
TTAATAGCCTTACATTTACTACCCCTTTTACTTCTATCTCTTAACCCCTAAAGTAGTTCTAGGCT  
TTATTTACTGTAAATATAGTTTAAACAAAAACATTAGATTGTGAATCTAGTAATAAAAAGCTTA  
AATCTTTTTATTTACCGAAAAAGCATGCAAGAACTGCTAATTCATGCACCCATGCATAAAAT  
CATGGCTTTTTCAACTTTTAGGGGATAGAAGTAATCCATTGGTCTTAGGAGCCAAAAAATTG  
GTGCAACTCCAAATAAAAAGTAATTAACCTACTTACCTCCTTACCATTACAACCCATTTTATA  
TTAATCATGCCATTATCCTAACCTGTACCCAGCATATGAAAATAAACTTTACCCGCAATAT  
GTAAAAACACAGTCTCTTATGCCTTCACAATTAGCATAAATCCCATAGTAATATTCATCCAC  
TCCGGACAAGAAGCAATCATCTCAAAGTACACTGAATAACCATCCAAACCCCTAAAACCTCA  
GTCTAAGCTTCAAATTAGATTACTTTTCAATAATCTTCGTACCAGTGGCCCTATTCGTCACAT  
GGTCAATTATAGAATTCTCTATATGATATATACACGCAGATCCTAACATTAACCGATTCTTTA  
AATATCTACTTATATTCCTCGTCACGATAATAATTCTAGTAACCGCAAATAATCTATTTTCAGC  
TATTTATCGGCTGAGAGGGAGTAGGAATCATATCATTTCTCCTCATTGGATGATGATATGGA  
CGAACAGATGCTAATACGGCTGCCCTACAAGCAGTACTATACAACCGCATTGGAGATGTTGG

TTTTATCATGGCCATAGCTTGATTCTTACTCAATACAAATGCATGGGACTTCCAACAAATCTT  
TATAATCGAGCATAAAAAACCTCAATATTCCACTGGCAGGACTACTTCTAGCAGCTACCGGAA  
AGTCTGCCCCAATTTGGACTTCACCCATGACTCCCATCAGCCATAGAAGGCCCCACTCCTGTCT  
CAGCACTACTTCACTCTAGCACAATAGTAGTAGCAGGCGTATTTCTTCTAGTCCGATTTCCACC  
CCTTAATAGAACATAACAAGACAATTCAAACGGTTACCCTATGCTTAGGGGCAATAACAACC  
TTGTTTACAGCAATCTGCGCCCTTACCCAAAATGATATCAAAAAAATTATTGCCTTCTCCACC  
TCGAGCCAACTAGGACTAATAATTGTAACAATTGGTATTAATCAGCCTCATCTGGCCTTTCTC  
CATATCTGCACGCACGCATTCTTCAAGGCCGTGCTATTTCTATGCTCCGGATCTATTATTCAT  
AGTCTAAACAACGAACAAGATATTGAAAGATAGGAGGGCTATTTAAAAGTCTACCATTTA  
CCACTACTGCTCTAATCATCGGAACTCTAGCACTTACAGGAATGCCCTTCTTAACAGGATTTT  
ACTCCAAAGACTTAATTATTGAAACCGCCAATACGTCATACACCAACGCCTGAGCCTTACTA  
ACAACCTTATCGCCACATCCATAACTGCCGCCTACAGTACTCGAATTGTATTTTTTACACTT  
CTAGGACAACCTCGCTATAGTCCCATTTATCACCATTAACGAGAATAACCAGTTCCTGACTAA  
CTCTGTCAAACGATTGCTACTAGGAAGTATCTTTGCGGGATTCTTAATCTCTCATAACATTAC  
ACCCACCACTGTCCCAAAATAACCATGCCCTGTCACCTAAAAATGATAGCCCTTACAGTAA  
CAATCCTAGGCTTTATTCTAGCACTAGAACTTAACCTAGCCATACAAAATCTCAAATTTGACT  
ACCTTTAAGCACGTTCAAATTTTCAAATCAACTAGGATATTTCCCTACTACTCTGCATCGTC  
TCGCACCAATAATAGGTCTATCAATAAGCCAAAAAACAGCATCCATACTGCTAGATGCAATC  
TGACTAGAGAATGTTCTACCAAAGTCCATCTCCTACTTTCAAATAAAAATCCTCAATCACAGT  
CTCCAACCAAAAGGGACTAATTAACTATACTTTCTCTCCTTTATAATTACACTAGTCTTAAG  
TCTCTTTATACTTAATTTCCACGAGTGACTTCCATAATTACCAATACACCAATAAGGAGAGAT  
CATCCAGTAACAATAACTAATCAAGTACCATAACTATATAAAGCTGCAATTCCCATAGCCTC  
TTCATAAAAAATCCTGAATCCCCTGTGTCATAAATCACCCAATCTCCTATTCCATTAACTT  
AAATACTACCTCGGCTTCATCATCCTTTAAAATATAACAAACAGCCAGTAACTCAGACAACA  
GACCTACAATAAATGCACCTAGTACAGCCTTATTAGAAAGTCAAACCTCAGGATATTGCTCA  
GTGGCTATGGCCGTAGTGTACCCGAACACTACAAGTATACCCCTAAATAAATTA AAAAGAC  
CATTAAACCAAAAAAAGATCCTCCAAAGCTTAACACAATACCACACCCTACACCCCCACTAA  
CAATCAAGACTAAACCTCCGTAGATAGGAGAGGGCTTAGAAGAAAACCCCGCAAACTAAC  
TACAAAAACGATACTTAAAATAGATACAATGTATGTTATCATCATTCTTACATGGAATCTAA  
CCATGACCAATGACATGAAAAATCATCGTTGTATTCAACTATAAGAACCCCAATGATCAAC  
ATCCGAAAACTCATCCATTAGTTAAAATTATCAACAACCTATTCAATTGACCTTCCAACACC  
ATCAAACATTTCAACATGATGAACTTTGGGTCCCTGTTAGGAGTGTGTCTGATCTTGCAAA  
TCTTAACAGGCTTATTTCTAGCCATACACTATACATCAGATACAGCTACAGCCTTTTCATCAG  
TCGCACACATTTGTGCGAGACGTCAACTATGGTTGATTTATCCGATATATACATGCCAATGGG  
GCCTCTATATTTTTTATCTGCCTATTTATACACGTAGGGCGAGGCTTATACTATGGATCATAC  
CTATTTCCAGAGACATGGAATATCGGAATTATTCTCCTACTTACAGTTATAGCCACAGCATTCT  
ATAGGGTATGTA CTACCTTGAGGACAAATATCCTTCTGAGGAGCAACCGTCATTACTAACCT  
ACTATCAGCAATTCCTTACATTGGCACTAATCTAGTGGAGTGAGTCTGAGGGGGTTTCTCCG  
TAGATAAAGCAACACTAACCCGATTTTTTTGCTTTTCACTTTATCCTTCCATTTATCATCTCAGC  
ACTAGCAATAGTCCATCTATTATTCCTTACGAAACAGGATCTAATAACCCCTCCGGAATTC  
CATCTGACCCAGACAAAATCCCATTTTACCCCTATCATACAATTAAAGACATCCTAGGCGTC  
CTATTTCTTGTCCTCGCCTTAATAACCCCTGGCTTTATTCTCACCAGACCTGTTAGGAGACCCT  
GATAACTATACCCCTGCAAATCCACTAAGTACCCCGCCACATATTAAGCCTGAATGGTACTT  
TCTATTTGCCTACGCTATCCTGCGATCTATTCTTAATAAACTAGGAGGGGTGCTAGCTCTAAT  
CTTCTCTATTCTAATTCTAACTATTATTCCACTATTACATACATCCAAACAACGAAGCATGAT  
ATTCCGACCTCTAAGTCAATGCTTATTCTGACTCCTAGTAGCAGACCTACTCACACTAACATG  
AATTGGAGGACAGCCAGTAGAACACCCCTTCATTATTATTGGGCAATTGGCCTCTATTCTCT  
ACTTTACAATTCTTCTAGTACTTATACCTATCACTAGCATTATTGAGAATAGCCTCTCAAAAT  
GAAGAGTCTTTGTAGTATATTAATTACTTTGGTCTTGTAACCAAAAAACGGAGATTCTCTAC  
TTCTCCCTAAGACTCAAGGAAGGAGCAACAACCCCACTACCAGCACCCAAAGCTGGTGTCT  
ACTTAAACTATCCCCTG

>SRR6109216 (circular)

ATACTATAAATCCACCTCTCATTTTATTCACTTCATACATGTTATTACACACTCTGTGCCATC  
ATAGTATGTTTTTCATACATCCTCCCTTCTTTACACCCTATGTATGTCGTACATTAATGGTGTA  
CCCCCCTCCCCCTATGTATATCGTGCATTAATGGCGTGCCCCATGCATATAAGCATGTACA  
TACTGTGCTTGGCTTTACATGAGGATACTCATTACAAGAACTTATTTCAAGCGATAGTCTATG  
AGCATGTATTTCACTTAGTCCAAGAGCTTGATCACCAAGCCTCGAGAAACCAGCAATCCTTG  
CGAGTACGTGTACCTCTTCTCGCTCCGGGCCCATAATTTGTGGGGGTTTCTATACTGAAACTA  
TACCTGGCATCTGGTTCTTACTTCAGGGCCATGTTAGCGTCAACTCAATCCTACTAACCCTTC  
AAATGGGACATCTCGATGGACTAATGACTAATCAGCCCATGATCACACATAACTGTGGTGTC  
ATGCATTTGGTATTTTTTAAATTTTTAGGGGGGGAACCTTGCTATGACTCAGCTATGACCGTAAA  
GGTCTCGTCGCAGTCAAATCAGCTGTAGCTGGGCTTATTCATCTTTCGAGGCTCCTCATAGAC  
ACCCATAAGGTGCAATTCAGTCAATGGTCACAGGACATAACACTATAGATCACCCGGACTG  
GCGTTACGTGTACGTACGTGTACGTACGTGTACGTACGTGTACGTACGTGTACGTACGTGTACG  
CGCACGTGTACGTACGTGTACGCACGTGTACGTACGTGTACGCACGTGTACGTACGTGTACG  
TACGTGTACGTACGTGTACGCACGTGTACGTACGTGTACGCACGTGTACGTACGTGTACGTA  
CGTGTACGCACGTGTACGCACGTGTACGCACGTGTACGCACGTGTACGCACGTGTACGCACG  
TGTACGCACGTGTACGTACGTGTACGTACGTGTACGTACGTGTACGCGTACGTATTTTAGAT  
ACTAAGTTAGCTTAGACAAACCCCCCTTACCCCCCGTAACTTCAAGAAGCTTACATATACTT  
ATGGATGTCCTGCCAAACCCCAAAAACAAGACTAAATATATGCGCAAACATGAAGTCACTT  
ACACCTAAACCCATATAATTAAGCTAACCCCCCAGCCAATGTTGCAACAACACTACGGACATGG  
GACTCTAAATTTTAATTTATCTATAGATATTTTTCTTTTACTGTGTCTCCCCAGCATTGATTTT  
TTAATTATCATTATTCCACACCACCAATTTCCATTGAGCTATTTACATGAGTTCCAAATCAA  
TTATGTTTCATGTAGCTTAACGAATAAAGCAAGGTACTGAAAATGCCTAGATGGGTCACGCTA  
CCCCATAGACATAAAGGTTTGGTCCTAGCCTTCCTATTAGCCATTAACAAGATTACACATGT  
AAGTCTCCACGCTCCAGTGAAAATGCCCTTAAGTCCTCTTAGACGACCTAAAGGAGCGGGT  
ATCAAGCACACCTTATGGTAGCTCACAACGCCTTGCTTAGCCACACCCCCACGGGAAACAGC  
AGTGATAAAAATTAAGCTATGAACGAAAGTTCGACTAAGCTATGTTAATACTAGGGTTGGTA  
AATCTCGTGCCAGCCACCGCGGTCTACGATTAACCTCGAGTTAATAGGCCTACGGCGTAAAG  
CGTGTAAGAAAGAAAAATCTCCTCTACTAAAGTTAAAGTATGATTAAGCTGTAAAGAGCTACC  
ATTAATACTAAAATAAACTACGAAAGTGACTTTAAATTTCTGATTACACGATAGCTAGGGC  
CCAACTGGGATTAGATACCCCACTATGCCTAGCTCTAAACATAGATATTTTACTAAACAAA  
ACTATTCGCCAGAGAACTACTAGCAACAGCTTAAACTCAAAGGACTTGGCGGTGCTTTATA  
TCCCCCTAGAGGAGCCTGTTCTGTAATCGATAAACCCCGATAGACCTCACCATCCCTTGCTA  
ATTCAAGTTTATATACCGCCATCTTCAGCAAACCCCTTAAAGGAAAAAAGTAAGCATAACTA  
CCCTACATAAAAAAGTTAGGTCAAGGTGTAACCTATGGGCTGGGAAGAAATGGGCTACATT  
TTCTATTCAAGAACAACTTCTACGAAAACCTTTTATGAACTAAAAGCTAAAGGCGGATTTAG  
TAGTAAATTAAGAATAGAGAGCTTAATTGAACAGGGCAATGAAGCACGCACACACCGCCCCG  
TCACCCTCCTCGAGTGATATAATTTAATTATAACCTATTTAACTAAGCAAAGCATAAGAGG  
AGACAAGTCGTAACAAGGTAAGCATACTGGAAAGTGTGCTTGGATGAGCCAAAGTGTAGCT  
TAAACAAAGCGTCTGGCTTACATCCAGAAGATTTCAATTAATATATGACTACTTTGAACCCAA  
AGCTAGCCCAAGCAACAATGACTAGTAAAACCATTATGAAACATTCAAACAAAACATTTAG  
TAGCATGACTAGAGTATAGGAGATAGAAATTTTTAACTGGAGCTATAGAGAGAGTACCGCA  
AGGGAATGATGAAAGATTACCTAAAGTGATAAACAGCAAAGATTGCCCTTCTACCTTTTGT  
ATAATGAGTTAGCTAGAAATAACTTAACAAAGAGAACTTAAGCTAAGTCCCCCGAAACCAG  
ACGAGCTACCTATGAACAATCCACTGGGATGAACTCATCTATGTTGCAAAATAGTGAGAAG  
ATCCATAGGTAGAGGTGAAAGGCCTAACGAGCCTGGTGATAGCTGGTTGCCCAGAATAGAA  
TTTTAGTTCGACTTTAAACCTGCCTACAAAACCTAATAATTCTAATGCAGATTTAAATATATT  
CTAAAAAGGTACAGCTTTTTAGAGTTAAGGATACAGCCTTACTTAGAGAGTAAATATTTATA  
TAAGCCATAGTAGGCCTAGAGGCAGCCATCAATTAAGAAAGCGTTAAAGCTCAACATCTCT  
ATTAACCTAATACCAAGAATATTTAATCAACTCCTAATGTATTACTGGGCCAATCTATTTAAA  
TATAGAAGTGATAATGCTAATATGAGTAACAAGAAATATTTCTCCCATGCATAAGCTTATAA

CAGCAACGGATAACCACTGATAGTTAACAACAACATAGAAATAACCTAATGATAAAACACC  
TATTAAATCAATTGTTAGTCCAACACAGGCATGCAATCAGGGAAAGATTAAAAGAAGTGAA  
AGGAACTCGGCAAACACAAACCCCGCCTGTTTACCAAAAACATCACCTCCAGCATTTCAGT  
ATTGGAGGCACTGCCTGCCCCGGTGACATCAGTTAAACGGCCGCGGTATTCTGACCGTGCAAA  
GGTAGCATAATCATTTGTTCTCTAAATAAGGACTTGTATGAACGGCCACACGAGGGTTTAAC  
TGTCTCTTACTTCCAATCAGTGAAATTGACCTCCCCGTGAAGAGGCGGGGATAAGACAATAA  
GACGAGAAGACCCTATGGAGCTTTAATTAATAATTCAAAAAGAACTACTAACGACCCAA  
CAGGAATAATATATCTCTTTTATGAATTAGCAATTTAGGTTGGGGCGACCTCGGAGGACAAA  
ATAGCCTCCGAGTGATTATAAATCTAGACTTACCAGTCAAAATGCTTAATCACTTATTGATCC  
AAAAATTCTTTTGATCAACGGAACAAGTTACCCTAGGGATAACAGCGCAATCCTATCCGAGA  
GTCCATATCGACAATAGGGTTTACGACCTCGATGTTGGATCAGGACATCCTAATGGTGCAGC  
AGCTATTAAAGGTTTCGTTTGTTCACGATTAAAGTCCTACGTGATCTGAGTTCAGACCGGAG  
CAATCCAGGTCGGTTTCTATCTATTCAAATAATTTCTCCAGTACGAAAGGACAAGAGAAAT  
AAGGCCTACTTCTCTGAAGCGCCTTAAGACCAATAGATGAATTTATCTAAATCTAGTAAATC  
TAACTCCAATATTGCCCAAGAGACAGGGCTTTGTTAGGGTGGCAGAGCCCGGTAATTGTGCA  
AACTTAAACTCTTGTGTCCAGAGGTTCAATTCCTCTCCCTAGCATATGTTTATAATTAACAT  
CTTCTCACTAATTGTACCTATTCTTCTTGCTGTAGCCTTTCTGACTCTAGTAGAACGAAAAGT  
ACTAGGCTACATACAGCTTCGAAAAGGCCCAAATATTGTAGGTCCATATGGTCTCTACAAC  
CAATCGCAGATGCCGTAAAACTCTTTACTAAAGAACCTTTACGACCACTTACGTCATCCATA  
ACTATATTTATTATAGCCCCCTATTCTAGCCTTAACACTAGCTCTGACCATGTGAGTCCCCTTA  
CCAATACCGCACCCCCTTATTAACATAAACCTAGGAGTACTATTCATACTAGCTATATCAAG  
TCTAGCTGTATACTCTATTCTCTGATCTGGATGAGCCTCAAACCTCAAAATATGCCCTAATTGG  
AGCCCTACGAGCCGTAGCTCAAACGATCTCATATGAAGTCACACTAGCCATTATCCTTTTAT  
CCGTTCTACTAATAAATGGCTCATTTACGCTATCCACGCTAATCATTACCCAAGAACGTCTTT  
GATTAATCTTCCCTGCATGACCACTAGCTATAATATGATTTATTTCTACCCTAGCAGAAACAA  
ATCGAGCCCCCTTGACCTAACAGAAGGAGAATCAGAACTAGTCTCTGGGTTTAATGTGCAA  
TATGCAGCAGGTCCATTTGCCCTGTTCTTCCTAGCAGAATATGCCAACATCATCATAATAAAT  
GCTCTTACAACCTATTCTATTCTTCGGAGCATTTTACAGCCCCCTACATACCAGAATTATATATT  
GTTAATTTTACCGTAAAACTTTACTCCTCACAATCTCTTTTCTATGAATCCGAGCATCATAT  
CCTCGATTCCGATATGACCAACTAATACACCTACTATGAAAAAATTTTCTACCTCTCACACTA  
GCTCTATGTATATGACATGTAACCTCTACCTATTATTACAGCAAGCATTCCACCTCAAACGTAA  
GAAATATGTCTGACAAAAGAATTACTTTGATAGAGTAAGCCATAGGGGTTTAAGTCCCCTTA  
TTTCTAGAATCATAGGAATCGAACCTAATCTTAAGAACTCAAAAATCTTCGTGCTACCTAAC  
TACACCATATCCTAAAGTAAGGTCAGCTAAATAAGCTATCGGGCCCATACCCCGAAAATGTT  
GGTTTATCCCCTTCCCATACTAATAAAACCAGCCATCCTTATTACCATTACATCCACCGTTGT  
CTTAGGAACATAATTGTTCTATTTAGCTCCCACTGATTCATAATCTGAGTTGGCTTTGAAAT  
AAATATACTAGCCATTATCCCAATTCTAATAAAAAAATATAACCCACGAGCCATAGAAGCTT  
CCACAAAATATTTTCTAACACAAGCTACAGCATCCATGCTTCTAATGCTAAGCATCATCATC  
AATCTACTATGCTCAGGACACTGGACAGTTTCAACAATTCCCAATCCAGTAGCATCTACCAT  
AATTACTATTGCTCTAACAATAAAACTTGGCCTATCACCATTTCACTTTTGAGTCCCAGAAGT  
TACACAAGGCATTTCTTATCTTCAGGAATAATCCTATTAACATGACAAAAAATTGCACCTTT  
ATCCATTCTATACCAAATTTACCCATCCGTTAACTCAAATCTCTTACTAATAATAGCTATCAC  
ATCCATACTGGTAGGAGGCTGAGGAGGATTAAATCAAACCCAACTCCGAAAAATCTTGGCA  
TACTCCTCAATTACCCATATAGGCTGAATGGCTGCTATTATAGTATATAATCCTACCCTAGCA  
ATTCTTAACCTAACAATTTACATCATAATAACTCTAGGAACATTTATACTATTACATACATAGC  
TCATCTACAACAACACTATCACTATCTTATACATGAAATAAATTCCCATTAAATAGCCCCACTA  
ATCTTAATACTTATACTATCACTAGGAGGCCTCCCTCCTCTCTCAGGCTTTATCCCCAAATGA  
ATAATTATTCAAGAATTAACAAAAAACGACATAATTATTATACCTACACTTATAGCCATTAC  
AGCCCTACTAAACCTATATTTTTACACACGCCTAACATATACTACAGCACTAACTATATTTCC  
CGCAACAAATAATATAAAAAATAAAATGACAATTCGAAACCACAAAAAAGACAACCTCTCCTA  
GCCCCTCTAATCGTGACATCAACTATACTACTACCACTAACCCCAATACTAGCAGCTCTTGAT

TAGAGATTTAGGCTAAACAGACCAAGGGCCTTCAAAGCCTCAAGTAAGTGAAAATCCACTT  
AATCTCTGCAATATTTAAGGACTGCAAGAATCTATCTCACATCAACTGAACGCAAAACAATC  
GCTTTAATTAAGCTAAGCCCTTCTAGATCGGTGGGCTTTTACCCACAAAACCTTTAGTTAACA  
GCTAAAAACCCTAGACAACCTGGCTTCAATCTACTTCTCCCGCCGCGTAGGAAAAAAGGCG  
GGAGAAGCCCCGGCAGAATTGAAGCTGCTTCTTTGAATTTGCAATTCAATATGATTACTCAC  
CACAGAGCCTGGTAAAAAGAGGACTTAACCCCCATTCTTAGATTTACAGTCTAGTGCTTTTA  
TCAGCCATTTTACCTATGTTTCAATTAACCGATGACTGTTTTCCACCAACCACAAAGATATTGGC  
ACTCTTTATCTTCTGTTTGGCGCATGAGCTGGTATAACGGGCACTGCTCTTAGCCTTCTAATC  
CGTGCTGAATTAGGTCAGCCTGGAGCTCTGTTAGGAGATGACCAAATTTACAATGTAGTTGT  
AACTGCCACGCATTCGTAATAATCTTCTTTATAGTTATGCCTATTATGATCGGAGGCTTTGG  
AAATTGACTAGTACCTTTGATAATTGGTGCGCCTGATATAGCATTTCGCCGAATAAACAATA  
TGAGTTTCTGATTACTACCTCCATCCTTTCTTCTCCTTCTGGCTTCTTCCATAGTAGAAGCAGG  
CGCAGGGACTGGATGAACTGTATACCCCCCTCTAGCAGGTAACCTAGCCCATGCAGGAGCAT  
CAGTAGACCTAACAACTCTTTCTCTACATCTGGCAGGGGTTTCTTCTATTTTAGGGGCTATTA  
ACTTTATTACCACTATCATCAACATGAAACCCCCTGCAATATCTCAATATCAAACCTCCCCTAT  
TCGTGTGATCAGTACTTATCACAGCAGTACTTCTCCTTCTATCTTTACCAGTCTTAGCAGCTG  
GAATTACTATACTACTTACAGATCGAAATCTCAATACTACTTTCTTCGACCCGGCCGGAGGA  
GGGGATCCCATTTCTATATCAACATCTATTTTGATTCTTTGGCCATCCTGAAGTCTATATTCTA  
ATCCTCCCTGGGTTTGAATAATTTACACATTGTACATACTATTACAGGAAAGAAAGAGCC  
CTTTGGTTATATAGGAATAGTGTGGGCAATAATGTCAATTGGGTTCTTAGGATTTATTGTATG  
GGCCCATCATATATTTACTGTAGGCATAGATGTTGATACACGAGCCTATTTTACCTCGGCCAC  
TATAATTATTGCAATCCCGACAGGAGTTAAAGTATTACAGCTGACTAGCTACCCTGCATGGAG  
GAAATATTAAGTGATCCCCTGCCATAATGTGAGCCCTAGGTTTCATTTTTCTATTTACAGTAG  
GGGGTCTTACAGGCATTGTTCTAGCTAACTCATCTCTGGACATTGTCCTCCATGACACATACT  
ACGTAGTAGCACACTTCCACTATGTACTATCAATAGGGGCCGTGTTTCGCTATTATAGGAGGC  
TTCGTCCATTGATTCCCATTTATTTTCGGGCTATACACTTAATAATACATGAGCAAAAATTCAC  
TTCGTAAATTATATTTGTTGGAGTCAATATAACATTCTTCCCCCAGCACTTCCTAGGTCTATCA  
GGTATGCCTCGACGATATTCTGATTATCCAGACGCCTATACAGCATGAAACACAGTGTCTTC  
AATGGGTTTCATTCAATTTCACTAACAGCAGTTATGTTAATAATTTTCATAATTTGAGAAGCCTT  
CGCATCTAAACGAGAAGTGCGCAGTGATTGAGCTTACTACAATAATTTGAATGGCTCCACG  
GATGTCCTCCCCCATAACCATACTTCGAAGAGCCCGCCTACGTCATACTGAAATAAGAAAGG  
AAGGAATCGAACCCCTCTAGAATTGGTTTCAAGCCAACATCATAACCACTATGTCTCTCTCAA  
TAAAGAGGTATTAGTAAAAATTACATAACTTTGTCAAAGTTGAATTATAGGTGAAAATCCTT  
TATATCTCTATGGCGCATCCCTTTCAAACAGGCCTTCAAGATGCAACTTCCCCCATCATGGAA  
GAACTCCTACACTTCCATGATCATACTAATAATTGTATTCTTAATTAGCTCCTTAGTTCTC  
TATATCATTTCAATTATATTAATACTACTAAATTAACACATACAAATACAATAGACGCACAAGA  
AGTGGAGACAGTATGAACTATTCTACCAGCTATCATCTTAATTATAATTGCACTTCCATCACT  
ACGAATTCTTTATATGATAGATGAAATTAATAGCCCATCATTAAGTGTAAAGACTATGGGGC  
ATCAATGATACTGAAGCTATGAGTATACAGATTATGAAGACTTGAGCTTCGATTCTTATATA  
ACCCCAACACAAGAATTAAGCCCGGAGAGCTGCGATTACTAGAGGTAGATAATCGAGTAG  
TACTACCCATAGAAATAACAATTCGCATATTAATTTCCCTCAGAAGATGTGCTACATTTCGTGA  
GCTGTCCCATCTCTAGGACTAAAACTGATGCAATCCCGGGGCGATTAAATCAAACAACCTCT  
TATGGCCATGCGACCAGGACTATATTATGGCCAATGCTCAGAGATTTGCGGTTCTAATCATA  
GCTTTATACCCATTGTACTTGAAATAGTTCCGCTGTCTTACTTTGAAAAATGATCCGCTTCAA  
TACTATAAAATCATTAAAGAAGCTTTATAGCGTTAACCTTTTAAGTTAAAGACTGAGAGTGCA  
AGTCTCTCCTTAATGAAATGCCACAATTAGACACATCCACATGATTTATTACAATCCTATCC  
ATGATCTTAACACTATTTATTATATTTTCAGTTAAAAGTCTCAAAACACAACCTATCCTGAGTTT  
CCTGAATTA AAAACAACCCCACTATCAAAAAAACCTATGCCTTGAGAAGAAAAATGAACGA  
AAATCTGTTTCGCTCTTTTACTACCCCAATGATAATAGGAGTACCAATTGTGGTTCTGATTAT  
TATTTTCCCAAGTATCTTATTTCCCTCACCTAATCGATTAATCAATAACCGCCTAGCTACTGT  
CCAACAATGATTAATTCAATTAGTATCTAAGCATATACTGTCTATTACAAATTATAAAGGAC

AAACCTGAGCGCTAATACTAATGTCATTAATTTTATTTATTGGCTCAACTAACCTTTTAGGCC  
TATTACCACATTCATTACACCTACTACACAACCTATCAATAAAATTTAGGAATGGCCATTCCTC  
TGTGAGCAGGTACAGTAGTTATAGGATTTTCGACACAAAACCTAAGGCATCTCTGGCCCACTTT  
CTACCCCAAGGAACACCTCTTCCTCTGATCCCAGTGTTAGTAATTATCGAGACAATTAGTCTG  
TTTATTCAACCTGTGGCCCTAGCTGTACGACTGACCGCTAATATTACTGCAGGCCATCTACTT  
ATTCATTTAATCGGAGGGGCTACCCTAGTTTTTAATAAACATTAACCCTGTAACAGCCCTAATT  
ACCTTTATTATTCTTATTCTACTTACTATTCTCGAATTAGCTGTAGCTCTTATCCAAGCCTATG  
TTTTACCCCTACTAGTTAGTCTATACTTACATGATAATACCTAATGATCCACCAAACACATGC  
ATATCATATAGTTAACCCAAGCCCATGGCCACTTACAGGAGCTCTCTCGGCTCTTCTTATAAC  
ATCAGGACTAATTATATGATTTCACTTTAACTCGGTATACTTACTAATACTAGGCCTCACCAC  
CAACATACTTACCATGTACCAATGATGACGAGATATCGTCCGGGAAAGTACCTTCCAAGGCC  
ATCACACCCCAATCGTCCAAAAAGGACTACGATATGGAATAGTCTTATTTATTGTATCAGAA  
GTATTTTTCTTCGCGGGATTCTTTTGGGCCTTCTACCCTCAAGCCTAGCACCTACTCCTGAA  
TTAGGAGCATGTTGACCACCTACAGGTATCATCCCCTTAAATCCGCTAGAAGTTCCTACTT  
AACACCTCTGTACTTCTAGCATCTGGGGTATCTATCACTTGAGCTCATCATAGTCTAATAGAA  
GGAGACCGTAAACATATGCTCCAAGCCCTATTTATTACTATTTCACTAGGAGTTTATTTTACA  
CTTCTACAAGCCTCAGAATACTATGAGACATCCTTTACTATTTTCAGATGGAGTGTATGGTTCA  
ACCTTCTTTATAGCAACTGGATTTTCATGGGCTTCATGTAATTATTGGTTCAACTTTTCTTACTG  
TGTGTTTTCTACGACAACCTGCCTTTCACTTTACATCCAACCATCACTTTGGCTTTGAAGCGG  
CAGCATGATACTGACACTTCGTAGACGTTGTATGGCTTTTCTTTATGTTTCTATTTACTGAT  
GAGGATCCTACTTCTTTAGTATTAACCTAGTACGATTGACTTCCAATCAATAGGCTCTGGTACA  
AGCCAGAAAGAAGTAATAAACCTAATTCTAGCACTTCTAACCAACGTATTATTAGCCTCTCT  
GCTCGTTCTTATTGCATTCTGACTGCCACAACCTAAATATCTATGCAGAAAAAGTAAGTCCTTA  
TGAATGTGGATTTGATCCTATAGGATCAGCACGCCTTCCTTTCTCTATAAAATTTTTTCTAGT  
AGCTATTACATTCTTTTATTCGACTTAGAAATTGCTCTACTCCTCCCGCTTCCTTGAGCATT  
CAGACTAACAACCTAATAACTATGCTTATTATAGCTCTATTACTCATTTCCTATTAGCCGCA  
AGCCTAGCTTATGAGTGAACCGAAAAAGGGGCTAGAATGGGCCGAATATGATAATTAGTTTA  
AACTAAAATAAGTGATTTTCGACTCACTAGATTATGACTAACATCATAATTATCAAATGTCTG  
TGGTCTATATTAATCTCTTTCTAGCCTTTACTATATCCTTAATAGGGCTACTCATCTACCGATC  
CCATTTAATATCCTCCCTATTATGCTTAGAAGGCATGATGCTGTCCTATTTGTTATACTAAC  
AGTAACAATCCTAAGTAACCACTTCACACTAGCCAGTATGACTCCAATCATTCTATTAGTATT  
CGCTGCCTGTGAAGCAGCGTTGGGGCTTTCTCTGCTAGTAATAGTCTCTAATACTATGGAA  
CTGACTACGTACAAAATCTTAACCTCCTACAATGCTAAAAATTATCCTCCCTACCATAATACT  
AGTACCCCTTACATGAATATCAAAGCCTAACATAATCTGAATTAATACAACAACCTATAGTC  
TACTCATCAGCCTTATTAGTCTGACATATCTCAATCAACTCAGTGATAATAGTCTAACTTCT  
CATTAAACATTCTTTACCGACTCCCTATCAGCCCCCTGTAGTTCTCACACATGACTACTGC  
CCTTAATACTTATAGCTAGTCAATTTACCTGTCAAAAGAGACCCTGACCCGGAAAAAATTA  
TATATACAATACTAATTCTCCTGCAACTATTCTTAATTATAACATTTTCCGCTACTGAGTTA  
ATCATATTCTATATTTTATTTGAAGCTACCCCTGGTACCGACTTTAGTTATCACTACTCGATGA  
GGAAACCAAACAGAACGACTAAACGCGGGCCTCTATTTTTTATTCTACACCTTAGTAGGATC  
CTTGCCCTTACTAGTTGCACTGTTATATGCCCAAAACAGCTTAGGATCACTAAATTTTCTCAT  
AGTACAGTACTGAACTCAGCCCTTGCCAAATTCCTGATCTAACATTTTCATGTGGCTGGCATG  
TATAATAGCATTCATAGTAAAAATACCGCTATATGGCTTACACCTATGACTACCCAAAGCAC  
ATGTAGAAGCTCCTATTGCAGGATCCATAGTACTTGCTGCAGTACTTCTAAAACCTAGGGGGA  
TACGGTATAATGCGGATTACAACAATACTCAACCCTCTAACAAATTTTATAGCCTACCCCTTC  
ATAATGCTCTCACTATGAGGAATAATCATAACAAGTTCTATTTGTTTACGCCAGACAGACCT  
AAAGTCCCTAATTGCATACTCCTCTGTTAGTACATAGCCCTAGTCATTGTAGCAATTCTAAT  
CCAATCCCCATGAAGCTACATAGGAGCTACTGCTCTAATAATCGCCCATGGGTAAACATCTT  
CTATGCTATTCTGTCTTGCAAACCTCTAACTACGAGCGAACCCTAGCCGAACCTATAATTCTCG  
CACGGGGCTTGCAAACGCTTCTTCCACTTATAGCAGCTTGATGACTATTAGCAGGCCTAACT  
AACTTAGCTCTTCTCCTACAATTAATCTGATTGGGGAACCTGTTTGTAGTGATAGCCACATTT

TCATGATCCAATATTACCATTCTCTTAATAGGAGTTAACATTACCATTACTGCTCTCTACTCT  
CTATATATACTAATTTCTACACAGCGAGGCAAGTATACAGACCACATCAAAAATATTAAGCC  
ATCTTATACACGAGAAAAATGCCTTAATAGCCTTACATTTACTACCCCTTTTACTTCTATCTCTT  
AACCCCTAAAGTAGTTCTAGGCTTTATTTACTGTAAATATAGTTTAACAAAAACATTAGATTGT  
GAATCTAGTAATAAAAAGCTTAAATCTTTTTATTTACCGAAAAAGCATGCAAGAAGTGTAAAT  
TCATGCACCCCATGCATAAAATCATGGCTTTTTCAACTTTTAGGGGATAGAAGTAATCCATTG  
GTCTTAGGAGCCAAAAAATTGGTGCAACTCCAAATAAAAAGTAATTAACCTACTTACCTCCTT  
CACCATTACAACCCTATTTATATTAATCATGCCATTATCCTAACCTGTACCCCGCATATGA  
AAATAAACTTTACCCGCAATATGTAAAAACCACAGTCTCTTATGCCTTCACAATTAGCATAA  
TTCCCATAGTAATATTCATCCACTCCGGACAAGAAGCAATCATCTCAAACCTGACACTGAATA  
ACCATCCAAACCCTAAAACCTCAGTCTAAGCTTCAAATTAGATTACTTTTTCAATAATCTTCGTA  
CCAGTGGCCCTATTCGTCACATGGTCAATTATAGAATTCTCTATATGATATATACACGCAGAT  
CCTAACATTAACCGATTCTTTAAATATCTACTTATATTCCTCGTCACGATAATAATTCTAGTA  
ACCGCAAATAATCTATTTTCAGCTATTCATCGGCTGAGAGGGAGTAGGAATCATATCATTCTCT  
CCTCATTGGATGATGATATGGACGAACAGATGCTAATACGGCTGCCCTACAAGCAGTACTAT  
ACAACCGCATTGGAGATGTTGGTTTTATCATGGCCATAGCTTGATTCTTACTCAATACAAATG  
CATGGGACTTCCAACAAATCTTTATAATCGAACATAAAAAACCTCAATATTCCACTGGCAGGA  
CTACTTCTAGCAGCTACCGGAAAGTCTGCCCAATTTGGACTTCATCCATGACTCCCATCAGCC  
ATAGAAGGCCCCACTCCTGTCTCAGCACTACTTCACTCTAGCACAATAGTAGTAGCAGGCGT  
ATTTCTTCTAGTCCGATTTACCCCTTAATAGAACATAACAAGACAATTCAAACGGTTACCCCT  
ATGCTTAGGGGCAATAACAACCTTGTTTACAGCAATCTGCGCCCTTACCCAAAATGATATCA  
AAAAAATTATTGCCTTCTCCACCTCGAGCCAACTAGGACTAATAATTGTAACAATTGGTATT  
AATCAGCCTCATCTGGCCTTTCTCCATATCTGCACGCACGCATTCTTCAAGGCCATGCTATTT  
CTATGCTCCGGATCTATTATTCATAGTCTAAACAACGAACAAGATATTCGAAAGATAGGAGG  
GCTATTTAAAAGTCTACCATTTACCACTACTGCTCTAATCATCGGAACCTCTAGCACTTACAGG  
AATGCCCTTCTTAACAGGATTTTACTCCAAAGACTTAATTATTGAAACCGCCAATACGTCAT  
ACACCAACGCCTGAGCCTTACTAACAACCCCTATCGCCACATCCATAACTGCCGCCTACAGT  
ACTCGAATTGTATTTTTTACACTTCTAGGACAACCTCGCTATAGTCCCATATCACCATTAAC  
GAGAATAACCAGTTCCTGACTAACTCTGTCAAACGATTGCTACTAGGAAGTATCTTTGCGGG  
ATTCCTAATCTCTCATAACATTACACCCACCACTGTCCACAAATAACCATGCCCTGTCACCT  
AAAAATGATAGCCCTTACAGTAACAATCCTAGGCTTTATTCTAGCACTAGAACTTAACCTAG  
CCATACAAAATCTCAAATTTGACTACCCGTTAAGCACGTTCAAATTTTCAAATCAACTAGGA  
TATTTCCCTACTACTCTGCATCGTCTCGCACCAATAATAGGTCTATCAATAAGCCAAAAAAC  
AGCATCCATACTGCTAGATGCAATCTGACTAGAGAATGTTCTACCAAAGTCCATCTCCTACT  
TTCAAATAAAATCCTCAATCACAGTCTCCAACCAAAAAGGGACTAATTAACTATACTTTCTC  
TCCTTTATAATTACACTAATCTTAAGTCTCTTTATACTTAATTTCCACGAGTGACTTCCATAAT  
TACCAATACACCAATAAGGAGAGATCATCCAGTAACAATAACTAATCAAGTACCATAACTA  
TATAAAGCTGCAATTCCCATAGCCTCTTCACTAAAAAATCCTGAATCCCCTGTATCATAAATC  
ACCCAATCTCCTATTCCATTAACTTAAATACTACCTCGGCTTCATCATCCTTTAAAATATAA  
CAAACAGCCAGTAACTCAGACAACAGACCTACAATAAATGCACCTAGTACAGCCTTATTAG  
AAAGTCAAACCTCAGGATATTGCTCAGTGGCTATGGCCGTAGTGTACCCGAACACTACAAGT  
ATACCCCTAAATAAATTA AAAAAGACCATTAAACCCAAAAAAGATCCTCCAAAGCTTAACA  
CAATACCACACCCTACACCCCACTAACAATCAAGACTAAACCTCCGTAGATAGGAGAGGG  
CTTAGAAGAAAACCCCGCAAACTAATAAAAAACGATACTTAAAATAGATACAATGTAT  
GTTATCATCATTCTTACATGGAATCTAACCATGACCAATGACATGAAAAATCATCGTTGTATT  
TCAACTATAAGAACCCCAATGATCAACATCCGAAAAACTCATCCATTAGTTAAAATTGTCAA  
CAACTCATTGACCTTCCAACACCATCAAACATTTCAACATGATGGAACCTTTGGGTCCCT  
GTTAGGAGTGTGTCTGATCTTGCAAATCTTAACAGGCTTATTTCTAGCCATACACTATACATC  
AGATACAGCTACAGCCTTTTCATCAGTCGCACACATTTGTGCGAGACGTCAACTATGGTTGAT  
TTATCCGATATATACATGCCAATGGGGCCTCTATATTTTTATCTGCCTATTTATACACGTAG  
GGCGAGGCTTATACTATGGATCATACCTATTTCCAGAGACATGGAATATCGGAATTATTCTC

CTACTTACAGTTATAGCCACAGCATTTCATAGGATATGTACTACCTTGAGGACAAATATCCTT  
CTGAGGAGCAACCGTCATTACTAACCTACTATCAGCAATTCCTTACATTGGCACTAATCTAG  
TGGAGTGAATCTGAGGGGGTTTCTCCGTAGATAAAGCAACACTAACCCGATTTTTTGGCTTTC  
ACTTTATCCTTCCATTTATCATCTCAGCACTAGCAATAGTCCATCTATTATTCCTTCACGAAA  
CAGGATCTAATAACCCCTCCGGAATTCCATCTGACCCAGACAAAATCCCATTTTACCCCTAT  
CATACAATTAAAGACATCCTAGGCGTCCTATTTCTTGTCTCGCCTTAATAACTCTGGCTTTA  
TTCTCACCAGACCTGTTAGGAGACCCTGATAACTATACCCCTGCAAACCCACTAAGTACCCC  
GCCACATATTAAGCCTGAATGGTACTTTCTATTTGCCTACGCTATCCTGCGATCTATCCCTAA  
TAAACTAGGAGGGGTGCTAGCTCTAATCTTCTCTATTCTAATTCTAACTATTATTCCACTATT  
ACATACATCCAAACAACGAAGCATGATATTCCGACCTCTAAGTCAATGCTTATTCTGACTCC  
TAGTAGCAGACCTACTCACACTAACATGAATTGGAGGACAGCCAGTAGAACACCCCTTCATT  
ATTATTGGGCAATTGGCCTCTATTCTCTACTTTACAATTCTTCTAGTACTTATACCTATCACTA  
GCATTATTGAGAATAGCCTCTCAAAATGAAGAGTCTTTGTAGTATATTAATTACTTTGGTCTT  
GTAAACCAAAAACGGAGATTCTCTACTTCTCCCTAAGACTCAAGGAAGGAGCAACAACCC  
CACTACCAGCACCCAAAGCTGGTGTCTACTTAACTATCCCCTG
